# Supplementary material
Source: ML conference proceedings conference paper supplement (https://aclanthology.org/P19-1544)
Supplement: Supplementary [file P19-1544.Supplementary.zip]

Archive with 103 entries (78 files):
- SF-ID-network/
- SF-ID-network/.DS_Store
- __MACOSX/
- __MACOSX/SF-ID-network/
- __MACOSX/SF-ID-network/._.DS_Store
- SF-ID-network/train_slot_only.py
- __MACOSX/SF-ID-network/._train_slot_only.py
- SF-ID-network/train_ID_only.py
- __MACOSX/SF-ID-network/._train_ID_only.py
- SF-ID-network/utils.py
- __MACOSX/SF-ID-network/._utils.py
- SF-ID-network/train.py
- __MACOSX/SF-ID-network/._train.py
- SF-ID-network/data/
- SF-ID-network/data/.DS_Store
- __MACOSX/SF-ID-network/data/
- __MACOSX/SF-ID-network/data/._.DS_Store
- SF-ID-network/data/atis/
- SF-ID-network/data/atis/valid/
- SF-ID-network/data/atis/valid/label
- __MACOSX/SF-ID-network/data/atis/
- __MACOSX/SF-ID-network/data/atis/valid/
- __MACOSX/SF-ID-network/data/atis/valid/._label
- SF-ID-network/data/atis/valid/seq.in
- __MACOSX/SF-ID-network/data/atis/valid/._seq.in
- SF-ID-network/data/atis/valid/seq.out
- __MACOSX/SF-ID-network/data/atis/valid/._seq.out
- __MACOSX/SF-ID-network/data/atis/._valid
- SF-ID-network/data/atis/.DS_Store
- __MACOSX/SF-ID-network/data/atis/._.DS_Store
- SF-ID-network/data/atis/test/
- SF-ID-network/data/atis/test/label
- __MACOSX/SF-ID-network/data/atis/test/
- __MACOSX/SF-ID-network/data/atis/test/._label
- SF-ID-network/data/atis/test/seq.in
- __MACOSX/SF-ID-network/data/atis/test/._seq.in
- SF-ID-network/data/atis/test/seq.out
- __MACOSX/SF-ID-network/data/atis/test/._seq.out
- __MACOSX/SF-ID-network/data/atis/._test
- SF-ID-network/data/atis/train/
- SF-ID-network/data/atis/train/label
- __MACOSX/SF-ID-network/data/atis/train/
- __MACOSX/SF-ID-network/data/atis/train/._label
- SF-ID-network/data/atis/train/seq.in
- __MACOSX/SF-ID-network/data/atis/train/._seq.in
- SF-ID-network/data/atis/train/seq.out
- __MACOSX/SF-ID-network/data/atis/train/._seq.out
- __MACOSX/SF-ID-network/data/atis/._train
- __MACOSX/SF-ID-network/data/._atis
- SF-ID-network/data/snips/
- SF-ID-network/data/snips/valid/
- SF-ID-network/data/snips/valid/label
- __MACOSX/SF-ID-network/data/snips/
- __MACOSX/SF-ID-network/data/snips/valid/
- __MACOSX/SF-ID-network/data/snips/valid/._label
- SF-ID-network/data/snips/valid/seq.in
- __MACOSX/SF-ID-network/data/snips/valid/._seq.in
- SF-ID-network/data/snips/valid/seq.out
- __MACOSX/SF-ID-network/data/snips/valid/._seq.out
- __MACOSX/SF-ID-network/data/snips/._valid
- SF-ID-network/data/snips/test/
- SF-ID-network/data/snips/test/label
- __MACOSX/SF-ID-network/data/snips/test/
- __MACOSX/SF-ID-network/data/snips/test/._label
- SF-ID-network/data/snips/test/seq.in
- __MACOSX/SF-ID-network/data/snips/test/._seq.in
- SF-ID-network/data/snips/test/seq.out
- __MACOSX/SF-ID-network/data/snips/test/._seq.out
- __MACOSX/SF-ID-network/data/snips/._test
- SF-ID-network/data/snips/train/
- SF-ID-network/data/snips/train/label
- __MACOSX/SF-ID-network/data/snips/train/
- __MACOSX/SF-ID-network/data/snips/train/._label
- SF-ID-network/data/snips/train/seq.in
- __MACOSX/SF-ID-network/data/snips/train/._seq.in
- SF-ID-network/data/snips/train/seq.out
- __MACOSX/SF-ID-network/data/snips/train/._seq.out
- __MACOSX/SF-ID-network/data/snips/._train
- __MACOSX/SF-ID-network/data/._snips
- __MACOSX/SF-ID-network/._data
- SF-ID-network/ReadMe.pdf
- __MACOSX/SF-ID-network/._ReadMe.pdf
- SF-ID-network/.idea/
- SF-ID-network/.idea/webServers.xml
- __MACOSX/SF-ID-network/.idea/
- __MACOSX/SF-ID-network/.idea/._webServers.xml
- SF-ID-network/.idea/inspectionProfiles/
- SF-ID-network/.idea/inspectionProfiles/profiles_settings.xml
- __MACOSX/SF-ID-network/.idea/inspectionProfiles/
- __MACOSX/SF-ID-network/.idea/inspectionProfiles/._profiles_settings.xml
- __MACOSX/SF-ID-network/.idea/._inspectionProfiles
- SF-ID-network/.idea/workspace.xml
- __MACOSX/SF-ID-network/.idea/._workspace.xml
- SF-ID-network/.idea/modules.xml
- __MACOSX/SF-ID-network/.idea/._modules.xml
- SF-ID-network/.idea/misc.xml
- __MACOSX/SF-ID-network/.idea/._misc.xml
- SF-ID-network/.idea/SlotGated-SLU-master.iml
- __MACOSX/SF-ID-network/.idea/._SlotGated-SLU-master.iml
- SF-ID-network/.idea/deployment.xml
- __MACOSX/SF-ID-network/.idea/._deployment.xml
- __MACOSX/SF-ID-network/._.idea
- __MACOSX/._SF-ID-network
