# Supplementary material
Source: ML conference proceedings conference paper supplement (https://aclanthology.org/P19-1544)
Supplement: Supplementary [file P19-1544.Supplementary.zip]

## Source Code Description

##Following is the structure and description of our files:

- **SF-ID-network:** It consists of the source code and dataset in the experiments.
  - **train.py:** The code that is used to train the model containing SF-ID network
  - **train\_ID\_only.py:** The code that is used to train the train only containing SF subnet
  - **train\_SF\_only.py:** The code that is used to train the train only containing ID subnet
  - **utils.py:** It contains some functions relevant with data processing and the evaluation of F1 score in slot-filling task
  - **data:** It involves the data used in the experiments
    - **atis:** This file is about atis dataset, including train/valid/test set.
    - **snips:** This file is about snips dataset, including train/valid/test set.

## Environment:

tensorflow 1.11.0

python 3.5.2

## Training parameters:

- dataset:** It depends on which dataset is used in the experiment, atis or snips
- priority\_order:** It depends on the execution order of the two subnets, slot-first or intent-first
- use-crf:** It depends on whether CRF layer is used, it belongs to boolean type. When it is set as True, CRF layer is used.
- iteration number:** It depends on the iteration number used in iteration mechanism.

## A command example:

```
python train.py --dataset=snips --priority_order=intent_first --use_crf=False --iteration_num=3
```
