# Supplementary material
Source: ML conference proceedings conference paper supplement (https://aclanthology.org/P19-1544)
Supplement: Supplementary [file P19-1544.Supplementary.zip › SF-ID-network/data/atis/test/label]

atis_flight
atis_airfare
atis_flight
atis_flight
atis_flight
atis_flight
atis_flight
atis_flight
atis_flight
atis_flight
atis_flight
atis_flight
atis_flight#atis_airfare
atis_flight
atis_flight
atis_flight
atis_flight
atis_flight
atis_flight
atis_flight
atis_flight
atis_flight
atis_flight
atis_flight
atis_flight
atis_flight
atis_flight
atis_flight
atis_flight
atis_flight
atis_flight
atis_flight
atis_ground_service
atis_flight
atis_day_name
atis_flight
atis_day_name
atis_flight
atis_flight
atis_flight
atis_flight
atis_flight
atis_flight
atis_flight
atis_flight
atis_flight
atis_flight
atis_flight
atis_flight
atis_flight
atis_meal
atis_meal
atis_flight
atis_flight
atis_flight
atis_flight
atis_flight
atis_flight
atis_flight
atis_flight
atis_flight
atis_flight
atis_flight
atis_flight
atis_flight
atis_flight
atis_flight
atis_flight
atis_flight
atis_flight
atis_flight
atis_flight
atis_flight
atis_flight
atis_flight
atis_flight
atis_flight
atis_flight
atis_flight
atis_flight
atis_flight
atis_flight
atis_flight
atis_flight
atis_flight
atis_flight
atis_flight
atis_flight
atis_flight
atis_flight
atis_flight
atis_flight
atis_flight
atis_airport
atis_flight
atis_flight
atis_flight
atis_flight
atis_flight
atis_flight
atis_flight
atis_flight
atis_flight
atis_airfare
atis_airline
atis_flight_time
atis_flight
atis_flight
atis_city
atis_airline
atis_flight
atis_flight
atis_flight
atis_flight
atis_flight
atis_flight
atis_flight
atis_flight
atis_flight
atis_ground_service
atis_flight
atis_flight
atis_flight
atis_flight
atis_flight
atis_flight
atis_flight
atis_flight
atis_flight
atis_airline
atis_flight
atis_flight
atis_flight
atis_flight
atis_flight
atis_flight
atis_ground_service
atis_ground_fare
atis_ground_fare
atis_flight
atis_ground_service
atis_flight
atis_flight
atis_flight
atis_flight
atis_flight
atis_flight
atis_flight
atis_flight
atis_flight
atis_flight
atis_flight
atis_flight
atis_flight
atis_airline
atis_flight
atis_flight
atis_flight
atis_flight
atis_flight
atis_flight
atis_flight
atis_flight
atis_quantity
atis_quantity
atis_quantity
atis_flight
atis_flight
atis_airport
atis_flight
atis_flight
atis_flight
atis_airfare
atis_airfare
atis_flight
atis_abbreviation
atis_meal
atis_flight
atis_flight
atis_flight
atis_flight
atis_flight
atis_flight
atis_flight
atis_flight
atis_flight
atis_flight
atis_flight
atis_flight
atis_flight
atis_distance
atis_distance
atis_distance
atis_distance
atis_ground_fare
atis_ground_fare
atis_ground_fare
atis_ground_fare
atis_airline
atis_flight
atis_flight
atis_airfare
atis_aircraft
atis_flight
atis_airfare
atis_flight
atis_flight#atis_airfare
atis_flight#atis_airfare
atis_flight#atis_airfare
atis_flight
atis_flight
atis_flight
atis_flight
atis_flight#atis_airfare
atis_airline
atis_airline
atis_distance
atis_flight
atis_flight
atis_flight
atis_flight
atis_flight
atis_flight
atis_flight
atis_flight
atis_flight
atis_flight
atis_flight
atis_flight
atis_airfare#atis_flight
atis_abbreviation
atis_distance
atis_distance
atis_distance
atis_distance
atis_ground_fare
atis_flight
atis_flight
atis_flight
atis_flight
atis_flight
atis_airline
atis_capacity
atis_capacity
atis_flight
atis_flight
atis_flight
atis_flight
atis_flight
atis_flight
atis_flight
atis_airfare
atis_abbreviation
atis_flight
atis_flight
atis_flight
atis_flight
atis_flight
atis_flight
atis_flight
atis_flight
atis_airline
atis_airfare
atis_airfare
atis_flight
atis_flight
atis_flight
atis_flight
atis_flight
atis_flight
atis_flight
atis_flight
atis_flight
atis_flight
atis_flight
atis_flight
atis_flight
atis_flight
atis_flight
atis_flight
atis_abbreviation
atis_flight
atis_flight
atis_flight
atis_flight
atis_flight
atis_flight
atis_flight
atis_flight
atis_flight
atis_flight
atis_abbreviation
atis_airline
atis_flight
atis_flight
atis_flight
atis_flight
atis_flight
atis_flight
atis_flight
atis_flight
atis_flight
atis_flight
atis_flight
atis_airline
atis_flight
atis_flight
atis_flight
atis_flight
atis_airfare
atis_airfare
atis_airfare
atis_airfare
atis_ground_service
atis_flight
atis_ground_service
atis_airline
atis_airfare
atis_flight
atis_flight
atis_flight
atis_flight
atis_flight
atis_flight
atis_flight
atis_flight
atis_abbreviation
atis_flight
atis_flight
atis_meal
atis_ground_service
atis_flight
atis_flight
atis_airfare
atis_abbreviation
atis_airfare
atis_flight
atis_flight
atis_flight
atis_flight
atis_flight
atis_abbreviation
atis_abbreviation
atis_flight
atis_flight
atis_flight
atis_abbreviation
atis_flight
atis_flight
atis_flight
atis_flight
atis_ground_service
atis_flight
atis_ground_service
atis_flight
atis_flight
atis_flight
atis_airline
atis_flight
atis_abbreviation
atis_abbreviation
atis_flight
atis_abbreviation
atis_flight
atis_airline
atis_flight
atis_flight
atis_ground_service
atis_capacity
atis_capacity
atis_flight
atis_ground_service
atis_capacity
atis_flight
atis_airline
atis_flight
atis_flight
atis_ground_service
atis_flight
atis_ground_service
atis_flight
atis_ground_service
atis_aircraft
atis_flight
atis_flight
atis_flight
atis_flight
atis_flight
atis_flight
atis_flight
atis_flight
atis_flight
atis_flight
atis_flight
atis_flight
atis_flight
atis_flight
atis_flight
atis_flight
atis_flight
atis_flight
atis_flight
atis_flight
atis_flight
atis_flight
atis_flight#atis_airfare
atis_flight#atis_airfare
atis_flight#atis_airfare
atis_airfare
atis_airfare
atis_airfare
atis_flight
atis_flight
atis_flight
atis_flight
atis_flight
atis_flight
atis_flight
atis_flight
atis_flight
atis_flight
atis_flight
atis_flight
atis_ground_service
atis_flight
atis_flight
atis_flight
atis_flight
atis_flight
atis_flight
atis_flight
atis_flight
atis_flight
atis_flight
atis_flight
atis_flight
atis_flight
atis_airfare
atis_flight
atis_airfare
atis_airfare
atis_flight
atis_flight
atis_flight
atis_flight
atis_flight
atis_flight
atis_flight
atis_ground_service
atis_flight
atis_ground_service
atis_flight
atis_flight
atis_flight
atis_flight
atis_flight
atis_flight
atis_flight
atis_flight
atis_flight
atis_flight
atis_airfare
atis_flight
atis_flight
atis_airfare
atis_airfare
atis_airfare
atis_airfare
atis_airfare
atis_airfare
atis_flight
atis_flight
atis_flight
atis_flight
atis_flight
atis_flight
atis_flight
atis_flight
atis_flight
atis_flight
atis_flight
atis_flight
atis_flight
atis_flight
atis_ground_service
atis_flight
atis_flight
atis_flight
atis_flight
atis_flight
atis_flight
atis_ground_service
atis_flight#atis_airline
atis_ground_service
atis_flight
atis_ground_service
atis_flight
atis_flight#atis_airfare
atis_flight#atis_airfare
atis_flight_no#atis_airline
atis_flight_no
atis_airport
atis_airport
atis_airport
atis_airport
atis_flight
atis_airport
atis_airport
atis_flight
atis_flight
atis_airline
atis_flight
atis_abbreviation
atis_flight
atis_flight
atis_aircraft
atis_flight
atis_flight
atis_airfare
atis_airfare
atis_flight
atis_ground_service
atis_flight
atis_flight
atis_flight
atis_flight
atis_flight
atis_flight
atis_flight_no
atis_flight
atis_abbreviation
atis_flight
atis_abbreviation
atis_airfare
atis_flight
atis_abbreviation
atis_abbreviation
atis_abbreviation
atis_abbreviation
atis_flight
atis_flight
atis_flight
atis_airline
atis_flight
atis_flight
atis_airline
atis_flight
atis_abbreviation
atis_flight
atis_abbreviation
atis_abbreviation
atis_abbreviation
atis_abbreviation
atis_flight
atis_flight
atis_flight
atis_flight
atis_flight
atis_flight
atis_flight
atis_flight
atis_flight
atis_flight
atis_flight
atis_flight
atis_airline
atis_ground_service
atis_ground_service
atis_flight
atis_flight
atis_flight
atis_airline
atis_airline
atis_airline
atis_airline
atis_airline
atis_flight
atis_airline
atis_flight
atis_flight
atis_flight
atis_airline
atis_flight
atis_flight
atis_airline
atis_ground_service
atis_flight
atis_ground_service
atis_flight
atis_flight
atis_flight
atis_flight
atis_flight
atis_flight
atis_abbreviation
atis_flight
atis_abbreviation
atis_abbreviation
atis_airline
atis_airline
atis_airline
atis_airline
atis_flight
atis_flight
atis_flight#atis_airfare
atis_flight
atis_flight
atis_flight
atis_airline
atis_flight
atis_flight
atis_flight
atis_flight
atis_flight
atis_flight
atis_flight
atis_flight
atis_flight
atis_flight
atis_flight
atis_flight
atis_distance
atis_airport
atis_airport
atis_airport
atis_airport
atis_airport
atis_airport
atis_airport
atis_city
atis_city
atis_flight
atis_flight
atis_flight
atis_flight
atis_flight
atis_flight
atis_flight
atis_flight
atis_flight
atis_flight
atis_aircraft
atis_flight#atis_airfare
atis_abbreviation
atis_flight
atis_airfare
atis_airfare
atis_flight
atis_flight
atis_flight
atis_flight
atis_flight
atis_airline
atis_flight
atis_capacity
atis_flight
atis_ground_service
atis_ground_service
atis_flight
atis_flight
atis_flight
atis_flight
atis_airfare
atis_flight
atis_airfare
atis_flight
atis_flight
atis_flight
atis_flight
atis_flight
atis_flight
atis_flight
atis_flight
atis_flight
atis_flight
atis_flight
atis_flight
atis_flight
atis_flight
atis_flight
atis_flight
atis_flight
atis_flight
atis_flight
atis_flight
atis_flight
atis_airfare
atis_airfare
atis_flight_no
atis_flight_no
atis_flight
atis_flight_no
atis_flight_no
atis_flight_no
atis_flight_no
atis_airfare
atis_airfare
atis_flight
atis_flight
atis_flight
atis_flight
atis_flight
atis_flight
atis_flight
atis_airfare
atis_airfare
atis_flight
atis_flight
atis_flight
atis_flight
atis_flight
atis_flight
atis_flight
atis_flight
atis_flight
atis_flight
atis_flight
atis_flight
atis_flight
atis_flight
atis_flight
atis_flight
atis_flight
atis_flight
atis_flight
atis_city
atis_city
atis_city
atis_flight
atis_flight
atis_flight
atis_flight
atis_abbreviation
atis_aircraft
atis_abbreviation
atis_airport
atis_flight
atis_flight
atis_flight
atis_meal
atis_meal
atis_flight
atis_flight
atis_flight
atis_flight
atis_airfare
atis_airfare
atis_airfare
atis_airfare
atis_airfare
atis_flight
atis_flight
atis_flight
atis_flight
atis_flight
atis_flight
atis_flight
atis_flight
atis_flight
atis_capacity
atis_capacity
atis_capacity
atis_capacity
atis_capacity
atis_capacity
atis_airline
atis_airline
atis_airline
atis_flight
atis_capacity
atis_abbreviation
atis_capacity
atis_capacity
atis_capacity
atis_capacity
atis_flight
atis_flight
atis_flight
atis_capacity
atis_aircraft
atis_aircraft
atis_aircraft
atis_capacity
atis_capacity
atis_capacity
atis_flight
atis_flight
atis_flight
atis_flight
atis_flight
atis_ground_service
atis_flight
atis_abbreviation
atis_ground_service
atis_ground_service
atis_ground_service
atis_ground_service
atis_flight
atis_flight
atis_ground_service
atis_flight
atis_flight
atis_flight
atis_flight
atis_airline
atis_flight
atis_flight
atis_flight
atis_flight
atis_flight
atis_airfare
atis_flight
atis_flight
atis_flight
atis_flight
atis_flight
atis_flight
atis_flight
atis_flight
atis_flight
atis_aircraft
atis_flight
atis_flight
atis_flight
atis_flight
atis_flight
atis_ground_service
atis_ground_service
atis_flight
atis_flight
atis_flight
atis_flight
atis_flight
atis_flight
atis_flight
atis_flight
atis_flight
atis_flight
atis_flight
atis_flight
atis_flight
atis_flight
atis_flight
atis_flight
atis_flight
atis_flight
atis_flight
atis_flight
atis_flight
atis_flight
atis_flight
atis_flight
atis_flight
atis_flight
atis_flight
atis_flight
atis_flight
atis_flight
atis_flight
atis_flight
atis_flight
atis_flight
atis_flight
atis_flight
atis_flight
atis_flight
atis_flight
atis_flight
atis_flight
atis_flight
atis_flight
atis_flight
atis_flight
atis_flight
atis_flight
atis_flight
atis_flight
atis_flight
atis_flight
atis_flight
atis_flight
atis_airline
atis_flight
atis_flight
atis_flight
atis_airport
atis_flight
atis_airport
atis_flight
atis_flight
atis_flight
atis_flight
atis_flight
