# Supplementary material
Source: ML conference proceedings conference paper supplement (https://aclanthology.org/P19-1544)
Supplement: Supplementary [file P19-1544.Supplementary.zip › SF-ID-network/data/atis/test/seq.in]

i would like to find a flight from charlotte to las vegas that makes a stop in st. louis
on april first i need a ticket from tacoma to san jose departing before 7 am
on april first i need a flight going from phoenix to san diego
i would like a flight traveling one way from phoenix to san diego on april first
i would like a flight from orlando to salt lake city for april first on delta airlines
i need a flight from toronto to newark one way leaving wednesday evening or thursday morning
monday morning i would like to fly from columbus to indianapolis
on wednesday april sixth i would like to fly from long beach to columbus after 3 pm
after 12 pm on wednesday april sixth i would like to fly from long beach to columbus
are there any flights from long beach to columbus on wednesday april sixth
find a flight from memphis to tacoma dinner
on next wednesday flight from kansas city to chicago should arrive in chicago around 7 pm return flight on thursday
show flight and prices kansas city to chicago on next wednesday arriving in chicago by 7 pm
flight on american from miami to chicago arrive in chicago about 5 pm
find flights arriving new york city next saturday
find nonstop flights from salt lake city to new york on saturday april ninth
show flights from burbank to milwaukee for today
show flights tomorrow evening from milwaukee to st. louis
show flights saturday evening from st. louis to burbank
show flights from burbank to st. louis on monday
show flights from burbank to milwaukee on monday
show flights tuesday evening from milwaukee to st. louis
show flights wednesday evening from st. louis to burbank
which flights travel from kansas city to los angeles
what flights travel from las vegas to los angeles
which flights travel from kansas city to los angeles on april ninth
which flights travel from las vegas to los angeles california and arrive on april ninth between 4 and 5 pm
which flights on us air go from orlando to cleveland
which flights travel from cleveland to indianapolis on april fifth
which flights travel from indianapolis to san diego on april fifth
which flights go from cleveland to indianapolis on april fifth
which flights travel from nashville to tacoma
does tacoma airport offer transportation from the airport to the downtown area
which flights travel from tacoma to san jose
what day of the week do flights from nashville to tacoma fly on
what are the flights from tacoma to san jose
what days of the week do flights from san jose to nashville fly on
what are the flights from tacoma to san jose
i need a flight that goes from boston to orlando
are there any flights from boston to orlando connecting in new york
are there any flights from boston to orlando connecting in columbus
does this flight serve dinner
i need a flight from charlotte to miami
i need a nonstop flight from miami to toronto
i need a nonstop flight from toronto to st. louis
i need a flight from toronto to st. louis
i need a flight from st. louis to charlotte
i need a flight on united airlines from la guardia to san jose
i need a flight from tampa to milwaukee
i need a flight from milwaukee to seattle
what meals are served on american flight 811 from tampa to milwaukee
what meals are served on american flight 665 673 from milwaukee to seattle
i need a flight from memphis to las vegas
i need a flight from las vegas to ontario
i need a flight from ontario to memphis
which flights go from milwaukee to tampa and stop in nashville
which flights leave newark after noon next saturday and arrive in los angeles
which flights leave detroit and arrive at st. petersburg around 9 am
which flights on northwest airline leave detroit and arrive at st. petersburg
which flights leave chicago next tuesday and arrive in detroit around 6 pm
show me round trip flights from chicago to detroit leaving next tuesday and returning the day after
which round trip flights leave chicago next tuesday around 6 pm and arrive in detroit
which round trip flights leave chicago next tuesday and arrive in detroit around 6 pm
which flights leave on monday from montreal and arrive in chicago in the morning
which flights leave chicago on april twelfth and arrive in indianapolis in the morning
which flights leave on wednesday april thirteenth from indianapolis and arrive in montreal in the morning
which flights leave april twelfth from indianapolis and arrive in montreal around 10 pm
i'd like to go from long beach to st. louis and i'd like to stop in dallas i'd also like to have lunch during my flight
next wednesday i would like to leave kansas city on a trip to chicago which arrives in chicago around 7 pm
i would like to return from chicago around 7 pm to kansas city
i would like to leave this afternoon on an american flight from cincinnati to burbank
on sunday evening i would like to leave montreal quebec on a flight to san diego california
what are the flights on sunday from montreal quebec to san diego california
on tuesday are the flights from san diego california to indianapolis indiana i would like the flight to be in the afternoon
on thursday morning i would like a nonstop flight from indianapolis to toronto
on friday morning i would like to fly from toronto to montreal
i would like an early morning flight today from los angeles to charlotte
on wednesday night i would like a flight from charlotte to newark
on friday night i would like a flight from newark to los angeles
find a flight from tampa to montreal by way of new york
please find a flight from miami florida to las vegas nevada arriving before 4 o'clock pm
please find a flight from las vegas to michigan
please find a flight from detroit michigan to st. petersburg arriving before 10 pm
please find a flight from st. petersburg to miami on thursday
please find a flight from san diego to toronto on alaska airlines
please find the flights from columbus to houston with a layover in nashville tomorrow
please give me the flights from nashville to houston nonstop with dinner served
please find flights available from kansas city to newark
please find a flight that goes from kansas city to newark to orlando back to kansas city
please find a flight from kansas city to newark
please find a flight from newark to orlando
please find a flight from orlando to kansas city
i would like to fly from columbus to phoenix through cincinnati in the afternoon
i would like to know what airports are in los angeles
does the airport at burbank have a flight that comes in from kansas city
which flights arrive in burbank from kansas city on saturdays in the afternoon
which flights arrive in burbank from las vegas on saturday april twenty third in the afternoon
which flights are available from orlando to cleveland that arrive around 10 pm
what flights are available from indianapolis to san diego on april twenty first in the late afternoon
what flights leave cleveland going to indianapolis on april twenty first in the morning
which flights are available on april twenty first in the morning from nashville to tacoma
which flights are available from tacoma to san jose in the morning on april twenty second
which flights are available from san jose to nashville leaving in the morning on april twenty three
what is the most expensive one way fare between detroit and westchester county
what airlines fly between detroit and westchester county
what are the departure times from detroit to westchester county
what is the latest flight from baltimore to oakland that serves dinner
what is the earliest flight between baltimore and oakland that serves breakfast
to what cities from boston does america west fly first class
what airline flies from boston to san diego
what is the latest breakfast flight from dallas to tampa
show me all lufthansa flights from seattle to boston with stopovers in minneapolis
show me all flights from seattle to boston with stopovers in minneapolis
list philadelphia to san francisco flights with stopovers in dallas
show me the connecting flights between boston and denver and the types of aircraft used
show me all the morning flights from philadelphia to fort worth
show me all the flights from kansas city to st. paul
show me northwest flight 608 from kansas city to st. paul
show me all the flights from indianapolis to charlotte on monday
what is the ground transportation between the charlotte airport charlotte airport and downtown charlotte
show me all the flights from charlotte to minneapolis that leave at 2 pm or later on monday
show me all the flights from charlotte to minneapolis on tuesday morning
show me the direct flights from charlotte to minneapolis on tuesday morning
show me flight us 1500 on monday from charlotte to minneapolis please
show me all the flights from minneapolis to indianapolis on tuesday that leave after 2 pm
show me the flights from minneapolis to indiana
show me the flights in from minneapolis to indianapolis on tuesday afternoon
show me flight us 1207 from indianapolis to charlotte on monday and flight us 1500 from charlotte to minneapolis on monday and flight twa 639 from minneapolis to indianapolis
show me all the flights from las vegas to new york city
which different airlines go from las vegas to new york city
show me all the flights on america west and twa from las vegas to jfk on a friday
what are the flights from tacoma to miami that leave after 6 pm tomorrow
i'd like to fly from san diego to houston on june tenth
is there an american airlines flight from houston to newark on june tenth after 6 pm
is there an american airlines flight from houston to newark on june tenth after 3 pm
i need to get from cincinnati to denver on june sixth by 6 pm
what's the ground transportation in denver
what's the fare for a taxi to denver
what are the fares for ground transportation in denver
i need to fly from denver to westchester county on june seventh after 3 pm
what's the ground transportation in westchester county
i need to take a united airlines flight on june eighth from westchester county to cincinnati after 3 pm
what united airlines flights on june eighth go from westchester county to cincinnati
on june eighth what flights go from westchester county to cincinnati
does us air fly from cincinnati to denver on june sixth
list the flights from cincinnati to denver on june sixth
list the flights from denver to westchester county on june seventh
list the flights from westchester county to cincinnati on june eighth
list the flights from cincinnati to westchester county on june sixth
list the flights from westchester county to denver on june seventh
list the flights from denver to cincinnati on june eighth
list the flights from denver to cincinnati on june sixth after 4 pm
list the flights from cincinnati to westchester county on june seventh
list the flights from westchester county to cincinnati on june seventh leaving after 5 pm
what airlines off from love field between 6 and 10 am on june sixth
what flights arrive at love field on june sixth
list the flights from montreal to philly before 9 am
list the flights from cleveland to memphis
list the flights from memphis to cleveland
list the flights from denver to baltimore arriving on july first
list the flights from dallas to baltimore arriving july first
list the flights from pittsburgh to baltimore arriving on july first
list the flights on canadian airlines international
how many canadian airlines international flights use j31
how many canadian airlines international flights use aircraft 320
how many canadian airlines flights use aircraft dh8
show me the flights on american airlines which fly from st. petersburg to ontario canada with a stopover in st. louis
show me the flights on american airlines which go from st. petersburg to ontario california by way of st. louis
which airport is closest to ontario california
show me the flights from houston to orlando
show me the flights from orlando to houston
show me the flights from detroit to las vegas
show me the cheapest round trip coach fare from las vegas to detroit
show me the cheapest round trip coach fare on twa from las vegas to detroit
show me the delta flights which serve a snack to coach passengers
what is meal code sb
what meals are available on dl 468 which al arrives in san francisco at 950 am
show me the delta flights from tampa to san francisco
show me delta flight 486
list the tower air flights on mondays
list all tower air flights with meals
what flights depart from baltimore
what flights depart from baltimore and arrive at san francisco on a friday
what flights leave from cincinnati in the morning and arrive in tampa
which flights depart from tampa and arrive in cincinnati in the evening
which flights depart from tampa in the early evening and arrive in cincinnati
which flights depart from philadelphia and arrive in atlanta
which flights depart from a atlanta and arrive in toronto
which flights depart from toronto and arrive in washington dc
which flights depart from new york and arrive in los angeles after 10 am
how far is new york's la guardia from downtown
how far is toronto international from downtown
how far is los angeles international from downtown
how far is san francisco international from downtown
how much is the limousine service in boston
how much is a limousine service in la guardia
how much is a limousine service in toronto international
how much is limousine service in los angeles
what airlines fly between washington dc and columbus ohio
what flights are there between washington dc and columbus ohio
what are the flights between washington dc and columbus ohio
what are the fares for all flights between washington and columbus
at the charlotte airport how many different types of aircraft are there for us air
list all us air flights arriving in charlotte on saturday at 1 pm
what is the first class round trip airfare from india indianapolis to memphis
list all flights from memphis to miami
list all flights and their fares from indianapolis to memphis on a monday morning
list all flights and their fares from memphis to miami on a wednesday evening
list all flights and their fares for all flights between miami and indianapolis
list all flights from cleveland to kansas city on monday
list all flights from kansas city to cleveland
list all flights from cleveland to nashville
list all flights from nashville to cleveland on sunday
list all sunday flights from cleveland to nashville and their fares
what airlines are departing from baltimore
which airlines fly from baltimore to san francisco
how long does a flight from baltimore to san francisco take
which flights are leaving from kansas city to atlanta early monday morning
which flights are leaving atlanta and arriving in st. louis close to 230 pm on tuesday
please list flights from st. louis to st. paul which depart after 10 am thursday morning
list flights from st. paul to kansas city friday in the evening with a meal included
list early morning flights from cincinnati to tampa
list early evening flights from tampa to cincinnati
list evening flights from tampa to cincinnati
list flights from philadelphia to atlanta friday am
list flights from atlanta to toronto friday afternoon
list flights from toronto to washington dc saturday am
list flights from washington dc to philadelphia saturday pm
list direct flights from new york city to los angeles after 10 am
list the airfare for american airlines flight 19 from jfk to lax
what is fare code m
list the distance in miles from boston airport to downtown boston
list the distance in miles from new york's la guardia airport to downtown new york city
list the distance in miles from toronto international airport to downtown toronto
list the distance in miles from san francisco international airport to san francisco downtown
list limousine rates for the city of boston
list american airlines flights from houston to milwaukee departing friday pm
list flights from houston to milwaukee friday pm
list american airlines flights from milwaukee to san jose wednesday
list american airlines flights from san jose to dallas friday afternoon
list flights from dallas to houston arriving sunday afternoon
list airlines flying from seattle to salt lake city
what is the seating capacity for aircraft l10
what is the seating capacity for delta be1
list flights from seattle to salt lake city on delta l10
list flights from seattle to salt lake city on delta be1
list flights from boston to pittsburgh daily
list flights from pittsburgh to newark daily
list flights from newark to boston daily
list us air flights leaving saturday from charlotte airport at 1 pm
list us air flights leaving saturday from charlotte airport around 1 pm
list first class airfare round trip from indianapolis to memphis
what is fare code f
list flights from memphis to miami wednesday evening
list flights from miami to indianapolis sunday
list flights from ontario california to orlando florida
list flights from ontario california to salt lake city utah
list flights from ontario california to salt lake city utah monday
list flights from salt lake city utah to phoenix arizona monday
list flights from salt lake city to phoenix arizona tuesday
list flights from phoenix arizona to ontario california wednesday
what airlines fly from baltimore to san francisco
what is the fare for a first class round trip ticket from detroit to st. petersburg
what is the airfare for a round trip first class ticket from detroit to st. petersburg
kansas city to atlanta monday morning flights
monday morning flights from atlanta to kansas city
kansas city to atlanta monday morning flights
atlanta to st. louis tuesday before 230 pm flights
st. louis to st. paul thursday after 10 am
st. paul to kansas city friday night
cleveland to kansas city arrive monday before 3 pm
kansas city to cleveland flight arrive wednesday before 5 pm
cleveland to nashville flight friday morning
nashville to cleveland sunday before 9
first class flights pittsburgh to newark monday morning
flights newark to los angeles wednesday morning
los angeles to minneapolis thursday afternoon
minneapolis to pittsburgh flight
minneapolis to pittsburgh first class flight
i would like flights leaving from milwaukee to orlando
what does hp stand for
i would like flights from ontario to tacoma
i would like flights from minneapolis to san diego
i would like flights from salt lake city to cincinnati
i would like to see flights from cincinnati to salt lake city
i'd like flights from new york to miami
i would like flights from miami to new york
i would like a flight leaving san francisco for san diego
i would like flights from san diego to las vegas
i would like a flight from san diego to las vegas
i would like flights from las vegas to san francisco
what does fare code bn mean
i would like to have the airline that flies toronto detroit and st. louis
i would like a flight from toronto to detroit
i would like a flight from detroit to st. louis
i would like a flight from toronto to st. louis
i would like flights from san francisco to long beach
i would like flights leaving san francisco to san diego
i would like a flight from san francisco to st. petersburg
show me a one way flight from milwaukee to orlando leaving wednesday afternoon after 6 pm
show me one way flights from milwaukee to orlando on wednesday
show me flights from columbus to chicago first class that leave before 10 am
show me the cheapest round trip between st. petersburg and detroit that arrives before 7 pm
show me nonstop flights from kansas city to phoenix
what is airline wn
show me the cheapest first class round trip from new york to miami
now show me all the round trips from new york to miami
show me the cheapest one way flight from san francisco to houston
now show me the cheapest one way flight from houston to boston
show me the cheapest round trip fares from houston to boston
show me the cheapest round trip fares from san francisco to houston
show me the cheapest round trip fare from san francisco to houston on february twenty eighth 1994
show me the cheapest one way fare from san francisco to houston on february twenty eighth 1994
now show me ground transportation in houston on monday afternoon
now show me one way flights from houston to boston
and now show me ground transportation that i could get in boston late night
show me airlines that have flights between toronto and detroit between detroit and st. louis and between st. louis and toronto
show me round trip fares from toronto to detroit on delta northwest us air and united airlines
show me flights between detroit and st. louis on delta northwest us air and united airlines
show me flights from montreal to orlando and long beach
show me flights from montreal to orlando
i need a flight on friday afternoon in june from new york to cleveland
i need a flight from new york to los angeles on saturday evening on us air
i'd like a red eye flight from new york to los angeles on saturday evening on us air
i'd like a flight from new york to los angeles on saturday morning on us air
i need a flight from san francisco to milwaukee on monday morning
what does ua mean
i need a flight from milwaukee to washington dc on monday night
how about flights from milwaukee to washington dc on tuesday mornings
what meals are there on flight 382 from milwaukee to washington dc on tuesday morning
i'll need to rent a car in washington dc
can i get a flight on tuesday night from washington dc to oakland
how about from dc to oakland on wednesday morning
how much does it cost to fly on twa from columbus to milwaukee
what does q mean
how much does it cost to fly from columbus to st. louis round trip on twa
what's the cheapest flight from columbus to st. louis round trip on twa
what's the cheapest round trip flight on twa from columbus to st. paul
i want to fly from milwaukee to los angeles
can i get the shortest flight from milwaukee to orlando
what is the shortest flight from milwaukee to long beach
what does m mean
what does ap 57 mean
what is the shortest flight from milwaukee to st. petersburg
what is the shortest flight from milwaukee to long beach
what is the shortest flight from milwaukee to san diego
what does ap 20 mean
can i get a flight today from san francisco to detroit michigan
what's the cheapest flight from san francisco to detroit today
i want to fly from san francisco to milwaukee and from milwaukee to denver
what's the cheapest flight from san francisco to milwaukee
i need to rent a car in milwaukee
what's the cheapest flight tomorrow from milwaukee to denver
what ground transportation is available at denver
what's the cheapest flight from san francisco to denver
what flights leave from cleveland and go to dallas
show me all nonstop flights from st. petersburg to charlotte
what airline is us
show me flights between toronto and san diego
what is phl
what is mci
show me the flights between oakland and salt lake city
what does not sa mean
what is the earliest daily flight between oakland and salt lake city
what airline is dl
what is the latest daily flight between oakland and salt lake city
show me the flights between los angeles and dallas
what ground transportation is available from dallas fort worth airport to downtown dallas
how many passengers can an l1011 aircraft hold
what is the seating capacity of a dc9
what are the flights between dallas and phoenix
what ground transportation is available between phoenix airport and downtown phoenix
what is the seating capacity for the aircraft m80
are there any flights between dallas and phoenix using a dc10 aircraft
what airline is aa
show me the flights between milwaukee and indiana
what are the flights between milwaukee and pittsburgh
what ground transportation is available between pittsburgh airport and downtown pittsburgh
show me the flights between pittsburgh and washington dc
what ground transportation is available between dca and downtown washington
what are the flights between dca and milwaukee
what ground transportation is available between milwaukee airport and downtown milwaukee
determine the type of aircraft used on a flight from cleveland to dallas that leaves before noon
find a flight between st. petersburg and charlotte the flight should leave in the afternoon and arrive as soon after 5 pm as possible it should be a nonstop flight
list a flight on delta airlines from toronto to san diego
list a flight on american airlines from toronto to san diego
list a flight from toronto to san diego
list flights from oakland to salt lake city leaving after 1700 wednesday
list flights from oakland to salt lake city leaving after midnight thursday
list flights between phoenix and las vegas
list flights from las vegas to denver
list flights from milwaukee to washington dc before 1200
list flights from washington dc to pittsburgh leaving after 1800
list flights from washington dc to pittsburgh
list flights between pittsburgh and milwaukee
i'd like a flight to san diego from washington dc
i'd like to fly from cleveland to dallas
i want to fly from washington dc to phoenix arizona
i need a flight from phoenix to atlanta
i would like to fly from atlanta to san diego
i would like to fly from san diego to seattle
i would like to fly from orlando to kansas city
i need a flight from kansas city to minneapolis
i need a flight from san diego to washington dc
i need a flight from washington dc to san diego
i need a round trip flight from san diego to washington dc and the fares
i need a round trip from atlanta to washington dc and the fares leaving in the morning
i need a round trip from phoenix to washington dc and the fare leaving in the morning
what is the lowest fare for a flight from washington dc to boston
what is the lowest fare from washington dc to montreal
what is the lowest fare from toronto to washington dc
i want a flight from montreal to washington dc
i want a flight from nashville to seattle that arrives no later than 3 pm
i want a flight from memphis to seattle that arrives no later than 3 pm
i need a flight from indianapolis to seattle arriving in seattle at 1205 pm
i want a flight round trip from memphis to seattle
i want to fly from nashville to seattle and i want the cheapest fare round trip
i want to fly from memphis to seattle round trip with the cheapest fare
i want to fly from indianapolis to seattle round trip with the cheapest fare
please list flights from orlando to philadelphia
please list flights from san francisco to charlotte
please list flights from milwaukee to philadelphia
please list flights from philadelphia to san francisco
please show ground transportation to milwaukee
please list flights from san francisco to milwaukee
list flights from houston to denver
list flights from houston to phoenix
list flights from phoenix to houston
list flights from newark to houston
show flights from denver to houston
show flights from st. petersburg to charlotte
show flights from orlando to kansas city
show flights from kansas city to minneapolis
show flights from kansas city to orlando
show flights from minneapolis to kansas city
show flights from kansas city to orlando
list flights from washington dc to boston
list fares from washington dc to montreal
list flights from washington dc to montreal
list fares from washington dc to toronto that should be good
list fares from washington dc to boston
list flights from washington dc to montreal
list flights from washington dc to toronto
list flights from toronto to washington dc
list flights from oakland to salt lake city
what flights go from dallas to phoenix
what flights go from phoenix to salt lake city
i need an early flight from milwaukee to denver
what types of ground transportation are available in denver
what flights go from denver to st. louis on tuesday morning
is ground transportation available in st. louis
i need to fly from st. louis to milwaukee on wednesday afternoon
flights from washington to seattle
flights from atlanta to seattle
flights from san diego to seattle
i would like flight information from phoenix to denver
could i have flight information on flights from salt lake city to phoenix please
could i have flight information on flights from pittsburgh to phoenix please
i would like information on flights leaving from washington dc to denver
i need information on flights from washington to boston that leave on a saturday
i need the flights from washington to montreal on a saturday
i need the fares on flights from washington to toronto on a saturday
i want to go from boston to washington on a saturday
i need a flight from cleveland to dallas that leaves before noon see if too much information
get fares from washington to boston
get saturday fares from washington to boston
get fares from washington to montreal
get saturday fares from washington to montreal
get saturday fares from washington to toronto
get the saturday fare from washington to toronto
list saturday flights from washington to boston
list saturday flights from boston to washington
get flights from milwaukee to dtw
list flights from milwaukee to detroit
get flights from detroit to toronto
get flights from toronto to milwaukee
get last flight from oakland to salt lake city on wednesday or first flight from oakland to salt lake city on thursday
get first flight from oakland to salt lake city on thursday
get last flight from oakland to salt lake city on wednesday
list last wednesday flight from oakland to salt lake city
get flight from toronto to san diego stopping at dtw
get flights between st. petersburg and charlotte
i need a flight from milwaukee to indianapolis leaving monday before 9 am
i need a flight departing from milwaukee to indianapolis leaving monday before 8 am
is there ground transportation available at the indianapolis airport
i need flight information for a flight departing from indianapolis to cleveland departing tuesday at noon
i need flight information for a flight departing from cleveland to milwaukee wednesday after 6 pm
i need flight information for flights departing from cleveland going back to milwaukee wednesday after 5 pm
i need flight information for flights departing from cleveland to milwaukee on wednesday after 5 pm
i need flight information for flights departing from cleveland to milwaukee on wednesday after 5 pm
i need a flight from denver to salt lake city on monday
is there ground transportation available at the denver airport
i need flight and airline information for a flight from denver to salt lake city on monday departing after 5 pm
is there ground transportation available at the salt lake city airport
i need a flight from salt lake city to phoenix departing wednesday after 5 pm
is there ground transportation available at the phoenix airport
i need a flight from oakland to salt lake city on wednesday departing after 6 pm
i need flight and fare information for thursday departing prior to 9 am from oakland going to salt lake city
i need flight and fare information departing from oakland to salt lake city on thursday before 8 am
i need flight numbers and airlines for flights departing from oakland to salt lake city on thursday departing before 8 am
i need flight numbers for those flights departing on thursday before 8 am from oakland going to salt lake city
list airports in arizona nevada and california please
list california nevada arizona airports
list the arizona airport
list california airports
list flights from las vegas to phoenix
list california airports
list airports
list wednesday night flights from oakland to salt lake city
list flights from oakland to salt lake city before 6 am thursday morning
which airlines fly between toronto and san diego
please list afternoon flights between st. petersburg and charlotte
what is tpa
what are the flights from cleveland to dallas
please list only the flights from cleveland to dallas that leave before noon
what type of aircraft are flying from cleveland to dallas before noon
i need information on flights from indianapolis to seattle
i need a flight from memphis to seattle
i need a ticket from nashville to seattle
i need a ticket from nashville tennessee to seattle
i need flight information from milwaukee to tampa
i need to rent a car at tampa
i need a daily flight from st. louis to milwaukee
i need flights departing from oakland and arriving salt lake city
i need information on flights from toronto to san diego
i need information on flights from toronto to san diego
i want a flight from toronto to san diego
i need information on flights between st. petersburg and charlotte
i need the flight numbers of flights leaving from cleveland and arriving at dallas
which flights go from new york to miami and back
what does fare code qo mean
show me flights from milwaukee to orlando one way
what the abbreviation us stand for
i'd like a one way ticket from milwaukee to orlando either wednesday evening or thursday morning
show me flights from milwaukee to orlando
what does fare code f mean
what does fare code h mean
what does fare code y mean
what are restrictions ap 57
please show me first class flights from indianapolis to memphis one way leaving before 10 am
now show me all round trip flights from burbank to seattle that arrive before 7 pm in seattle
round trip flights from orlando to montreal please
what airline is dl
show me all delta airlines flights from montreal to orlando
show me all flights from orlando to montreal please
which airline is kw
please list all flights from new york to miami any any type of class
what does fare code bh mean
show me a return flight from miami to jfk please
what does fare code bh mean
what does fare code bh mean
what does fare code bh mean
what does fare code bh mean
show me one way flights from milwaukee to orlando after 6 pm on wednesday
show me the flights from indianapolis to memphis
show me round trip flights from burbank to seattle
show me round trip flights from orlando to montreal
show me nonstop flights from montreal to orlando
show me round trips between montreal and orlando
show me round trip flights from montreal to orlando
show me the cheapest one way flights from montreal to orlando
show me the cheapest one way flights from orlando to montreal
show me the cheapest economy flights from miami to new york
kansas city to las vegas economy
kansas city to las vegas economy
what airline is hp
ground transportation in las vegas
ground transportation for las vegas
las vegas to baltimore economy
las vegas to baltimore economy
baltimore to kansas city economy
what airline is us
which airline is us
which airline is us
which airline is us
which airline is us
columbus to chicago one way before 10 am
what airline is hp
st. petersburg to detroit
from milwaukee to orlando one way after 5 pm wednesday
and from milwaukee to atlanta before 10 am daily
what airline is yx
show me all flights from san jose to phoenix
show me all flights from san jose to phoenix
what airline is hp
show me ground transportation in phoenix
show me flights from phoenix to fort worth
show me ground transportation in fort worth
show me flights from fort worth to san jose
show me first class flights from new york to miami round trip
show me first class flights from new york to miami round trip
show me all round trip flights from new york to miami nonstop
show me all round trip flights from miami to new york nonstop
show me one way flights from indianapolis to memphis before 10 am on any day
what does fare code f mean
show me round trip flights from burbank to tacoma
what does the restriction ap58 mean
what does fare code h mean
what airline is as
what airline is as
what airline is as
what airline is as as in sam
show me nonstop flights from st. petersburg to toronto
show me nonstop flights from toronto to st. petersburg
show me the nonstop flights and fares from toronto to st. petersburg
show me the nonstop flights from toronto to st. petersburg
show me weekday flights from milwaukee to orlando one way
show me weekday flights from milwaukee to orlando one way
what airline is hp
list flights from chicago to san diego
list flights from chicago to san diego
list flights from kansas city to denver
list flights from denver to phoenix
list flights from phoenix to las vegas
list flights from las vegas to san diego
list flights from chicago to kansas city in the morning
list flights from houston to san jose
list flights from houston to milwaukee
list flights from milwaukee to san jose on wednesday
list flights from san jose to dallas on friday
list flights from dallas to houston
list distance from airports to downtown in new york
list airports in new york
list airports in new york
list airports in la
list airports
list airports in la
list airports in la
list the airports in la
list la
list la
list flights from new york to la
list flights from la guardia to burbank
list flights from la to orlando
list flights from ontario california to orlando
list flights from ontario california to orlando
list flights from indianapolis to memphis with fares on monday
list flights from indianapolis to memphis on monday
list flights from memphis to miami on wednesday
list flights from miami to indianapolis on sunday
list flights from charlotte on saturday afternoon
list type of aircraft for all flights from charlotte
list flights and fares from tacoma to orlando round trip leaving saturday returning next saturday
what class is fare code q
list flights from orlando to tacoma on saturday of fare basis code of q
list airfares for first class round trip from detroit to st. petersburg
list coach round trip airfare from detroit to st. petersburg
list flights from pittsburgh to newark on monday morning
list flights from minneapolis to pittsburgh on friday
list flights before 9 am from cincinnati to tampa
list flights from cincinnati to tampa before noon
list flights from tampa to cincinnati after 3 pm
list airlines that fly from seattle to salt lake city
list delta flights from seattle to salt lake city
list seating capacities of delta flights from seattle to salt lake city
list delta flights from seattle to salt lake city with aircraft type
what ground transportation is there in baltimore
list ground transportation in baltimore
list flights from baltimore to san francisco on friday
give me the flights from los angeles to pittsburgh on tuesday
give me the flights from pittsburgh to los angeles thursday evening
give me the round trip flights from cleveland to miami next wednesday
give me the fares for round trip flights from cleveland to miami next wednesday
give me the flights and fares for a trip to cleveland from miami on wednesday
give me the fares from miami to cleveland next sunday
give me the flights from milwaukee to phoenix on saturday or sunday on american airlines
give me the flights from phoenix to milwaukee on wednesday evening
give me the flights from phoenix to milwaukee on wednesday on american airlines
give me the flights from phoenix to milwaukee on american airlines
give me the flights from phoenix to milwaukee
give me the meal flights departing early saturday morning from chicago to seattle nonstop
give me the flights from chicago to seattle saturday morning that have meals
give me flights from seattle to chicago that have meals on continental
give me the flights from seattle to chicago that have meals on continental saturday morning
give me the flights from chicago to seattle on continental that have meals early saturday morning
give me a combination of continental flights from chicago to seattle that have meals early saturday morning
give me the saturday morning flights with meals from chicago to minneapolis
give me the saturday morning flights on continental that have meals from chicago to minneapolis
give me the saturday morning flights from chicago to st. paul on continental that have meals
give me the flights from new york to las vegas nonstop
give me the flights from memphis to las vegas nonstop
give me the cheapest round trip flights from indianapolis to orlando around december twenty fifth
i need a friday flight from newark to tampa
i need a sunday flight from tampa to charlotte
give me a flight from charlotte to baltimore on tuesday morning
can i have a morning flight from baltimore to newark please
cheapest round trip fare from or indianapolis to orlando on december twenty fifth
cheapest one way fare from indianapolis to orlando on december twenty seventh
flight number from dallas to houston
flight number from houston to dallas
saturday flight on american airlines from milwaukee to phoenix
flight numbers on american airlines from phoenix to milwaukee
flight numbers from chicago to seattle
flight numbers from chicago to seattle on continental
flight numbers from seattle to chicago on continental
is there a fare from pittsburgh to cleveland under 200 dollars
how much is coach flight from pittsburgh to atlanta
newark to tampa on friday
tampa to charlotte sunday morning
charlotte to baltimore on tuesday
baltimore to newark wednesday morning
dallas to houston after 1201 am
houston to dallas before midnight
indianapolis to orlando december twenty seventh
cheapest fare from indianapolis to orlando on the twenty seventh of december
cheapest fare round trip from indianapolis to orlando on december twenty seventh
cleveland to miami on wednesday arriving before 4 pm
miami to cleveland sunday afternoon
new york city to las vegas and memphis to las vegas on sunday
new york city to las vegas and memphis to las vegas on sunday
new york to las vegas sunday afternoon
memphis to las vegas sunday afternoon
new york to las vegas on sunday afternoon
chicago to seattle saturday morning
chicago to las vegas saturday morning
los angeles to pittsburgh afternoon tuesday
los angeles to pittsburgh afternoon on monday
pittsburgh to los angeles thursday evening
milwaukee to phoenix on saturday
phoenix to milwaukee on sunday
phoenix to milwaukee on wednesday
a flight from baltimore to san francisco arriving between 5 and 8 pm
how many northwest flights leave st. paul
how many northwest flights leave washington dc
how many flights does northwest have leaving dulles
what cities does northwest fly out of
list the cities from which northwest flies
what cities does northwest fly to
i would like a connecting flight from dallas to san francisco leaving after 4 o'clock
please list all the flights from dallas to san francisco
tell me again the morning flights on american airlines from philadelphia to dallas
tell me the flights that leave philadelphia and go to dallas
what is a d9s
what type of plane is a d9s
what is a d9s
show me the airports serviced by tower air
show me the first class and coach flights between jfk and orlando
show me the first class and coach flights from kennedy airport to miami
show me the first class and coach flights from jfk to miami
are meals ever served on tower air
are snacks served on tower air
show delta airlines flights from jfk to miami
show delta airlines from boston to salt lake
show delta airlines flights from boston to salt lake
show delta airlines flights from boston to salt lake city
what are the fares for flights between boston and washington dc
what is the least expensive fare from boston to salt lake city
what are the lowest fares from washington dc to salt lake city
what is the lowest fare from bwi to salt lake city
show me the cost of a first class ticket from detroit to las vegas and back
what is the earliest arriving flight from boston to washington dc
what is the earliest arriving flight between boston and washington dc
what's the earliest arriving flight between boston and washington dc
what is the earliest arriving flight from houston to orlando
what is the earliest arriving flight from houston to orlando
show me the flights between houston and orlando
show me the flights between houston and orlando
show me the flights from houston to orlando
list all flights leaving denver between 8 pm and 9 pm
what is the seating capacity on the aircraft 733
what is the seating capacity of a 72s
what is the seating capacity of the aircraft 72s
what is the seating capacity of the aircraft m80
what is the seating capacity of the type of aircraft m80
what is the seating capacity of an m80
what airlines serve denver
list the airlines with flights to or from denver
what airlines fly into denver
list all flights arriving in denver between 8 and 9 pm
what is the capacity of the 73s
what is 73s
what is seating capacity on the aircraft 73s
what is the seating capacity of a 757
how many people will a 757 hold
how many passengers can fly on a 757
list all of the daily flights arriving in denver between 8 and 9 pm
list all of the daily flights arriving in denver from 8 to 9 pm
show me all of the daily flights arriving in denver between 8 pm and 9 pm
what is the seating capacity of the 757
tell me about the m80 aircraft
tell me about the m80 aircraft
tell me about the type of aircraft called an m80
what is the seating capacity of the 733
what is the seating capacity of the m80
what is the seating capacity on the aircraft m80
list all flights arriving or leaving denver between 8 and 9 pm
list all flights arriving in denver between 8 and 9 pm
list all flights on all types of aircraft arriving in denver between 8 and 9 pm
please list all flights from nashville to memphis on monday morning
please list the flights from nashville to memphis on monday morning
is there ground transportation from the memphis airport into town when if i arrive at 842 in the morning
please list the flights from memphis to new york city on a monday night
what is cvg
what ground transportation is available from la guardia airport into new york city
is there ground transportation from lga into new york city
please list the ground transportation from lga into new york city
please list ground transportation from ewr into new york city
show me the morning flights from memphis to new york city
give me the flights from new york city to nashville leaving after 5 pm on wednesday
tell me about the ground transportation from nashville airport
what are the nonstop flights from cincinnati to charlotte leaving after noon and arriving before 7 pm
how many flights does alaska airlines have to burbank
list the alaska airline flights from burbank to anywhere
list the alaska airline flights from burbank
which airline is as
list the alaska airlines flights arriving in burbank
list the alaska airlines flights a departing from burbank
list all alaska airlines flights
list all flights departing from seattle
list the flights from indianapolis to memphis that leave before noon
list the cheapest fare from charlotte to las vegas
i want a flight from los angeles to charlotte early in the morning
i would like a morning flight from charlotte to newark
i'd like a morning flight from newark to los angeles
i'd like an evening flight from newark to los angeles
i would like a flight that leaves on sunday from montreal quebec to san diego california
i would like a flight on tuesday which leaves from san diego to indianapolis indiana and that leaves in the afternoon
i would like to leave thursday morning from indianapolis to toronto
i would like a flight on friday morning from toronto to montreal
i would like a flight from cincinnati to burbank on american
what type of aircraft is used for the american flight leaving at 419 pm
i need a flight leaving kansas city to chicago leaving next wednesday and returning the following day
what flights go from long beach to st. louis
what are the flights from memphis to las vegas
what are the flights from las vegas to ontario
what are the flights from ontario to memphis
what type of ground transportation is there at the las vegas airport
is there taxi service at the ontario airport
what are the flights from tampa to milwaukee
what are the flights from milwaukee to seattle
what are the flights from la guardia to san jose on united
what are the flights on mondays that travel from charlotte north carolina to phoenix arizona
what are the flights from phoenix arizona to st. paul minnesota on tuesday
what are the flights on thursday leaving from st. paul minnesota to st. louis
what are the flights from st. louis to charlotte north carolina leaving on friday
what are the flights from boston to orlando that stop in new york
i need a morning flight from burbank to milwaukee on next monday
how about a flight from milwaukee to st. louis that leaves monday night
and a flight from st. louis to burbank that leaves tuesday afternoon
how about a flight leaving tuesday night from st. louis to burbank
i need a flight from salt lake to newark airport that arrives on saturday before 6 pm
i'd like a flight from cincinnati to newark airport that arrives on saturday before 6 pm
i need a flight on american airlines from miami to chicago that arrives around 5 pm
i need a flight from memphis to tacoma that goes through los angeles
what are the flights between cincinnati and san jose california which leave after 6 pm
what are the nonstop flights between san jose and houston texas
what are the nonstop flights between houston and memphis
what are the flights between memphis and cincinnati on wednesday
what are the american flights from newark to nashville
the flights from ontario to westchester that stop in chicago
please list the flights from los angeles to charlotte
please list the flights from charlotte to newark
please list the flights from newark to los angeles
please list the flights from cincinnati to burbank on american airlines
please give me the flights from kansas city to chicago on june sixteenth
please give me the flights from chicago to kansas city on june seventeenth
please list all the flights from kansas city to chicago on june sixteenth
please list all the flights from chicago to kansas city on june seventeenth
i'd like to travel from burbank to milwaukee
can you find me a flight from salt lake city to new york city next saturday before arriving before 6 pm
can you find me another flight from cincinnati to new york on saturday before 6 pm
can you list all of the delta flights from salt lake city to new york next saturday arriving before 6 pm
i'd like to fly from miami to chicago on on american airlines arriving around 5 pm
i'd like to travel from kansas city to chicago next wednesday
i'd like a round trip flight from kansas city to chicago on wednesday may twenty sixth arriving at 7 pm
yes i'd like to find a flight from memphis to tacoma stopping in los angeles
find flight from san diego to phoenix on monday am
find flight from phoenix to detroit on monday
find flight from detroit to san diego on tuesday
find flight from cincinnati to san jose on monday
find flight from san jose to houston on wednesday
find flight from houston to memphis on friday
find flight from memphis to cincinnati on sunday
find american flight from newark to nashville around 630 pm
please find a flight round trip from los angeles to tacoma washington with a stopover in san francisco not exceeding the price of 300 dollars for june tenth 1993
are there any flights on june tenth from burbank to tacoma
please find a flight from ontario to westchester that makes a stop in chicago on may seventeenth one way with dinner
like to book a flight from burbank to milwaukee
show me all the flights from burbank to milwaukee
find me all the flights from milwaukee to st. louis
now show me all the flights from st. louis to burbank
is there one airline that flies from burbank to milwaukee milwaukee to st. louis and from st. louis to burbank
find me all the round trip flights from burbank to milwaukee stopping in st. louis
i'd like to book two flights to westchester county
i want to book a flight from salt lake city to westchester county
tell me all the airports near westchester county
i'd like to book a flight from cincinnati to new york city on united airlines for next saturday
tell me all the airports in the new york city area
please find all the flights from cincinnati to any airport in the new york city area that arrive next saturday before 6 pm
find me a flight from cincinnati to any airport in the new york city area
i'd like to fly from miami to chicago on american airlines
i would like to book a round trip flight from kansas city to chicago
find me a flight that flies from memphis to tacoma
