# Supplementary material
Source: ML conference proceedings conference paper supplement (https://aclanthology.org/P19-1544)
Supplement: Supplementary [file P19-1544.Supplementary.zip › SF-ID-network/data/atis/train/seq.in]

i want to fly from baltimore to dallas round trip
round trip fares from baltimore to philadelphia less than 1000 dollars round trip fares from denver to philadelphia less than 1000 dollars round trip fares from pittsburgh to philadelphia less than 1000 dollars
show me the flights arriving on baltimore on june fourteenth
what are the flights which depart from san francisco fly to washington via indianapolis and arrive by 9 pm
which airlines fly from boston to washington dc via other cities
i'm looking for a flight from charlotte to las vegas that stops in st. louis hopefully a dinner flight how can i find that out
okay and then from pittsburgh i'd like to travel to atlanta on september fourth
show me all the flights from philadelphia to cincinnati
okay i'd like a flight on us air from indianapolis to san diego in the afternoon what's available
on tuesday what flights leave phoenix to st. paul minnesota and leave after noon
american flights from chicago to los angeles morning
what types of ground transportation are there to san francisco airport
in the next two days i want to fly from nashville to san jose or to tacoma
does continental airlines fly from denver to san francisco
chicago to milwaukee
how many flights does twa have in business class
show me the flights from dallas to baltimore in first class
i'd like to find the least expensive one way fare from boston to philadelphia
how many booking classes are there
what are the flights from tacoma to san jose on wednesday the nineteenth
what flights leave pittsburgh july fifth after 7 pm and arrive in san francisco
please list all the arriving and departing flights from general mitchell international
what time zone is denver in
show me ground transportation in boston and in baltimore
i want to find the first flight from baltimore to boston that serves a meal
from seattle to salt lake city
can you show me the flights from dallas to baltimore with economy fares
what flights leave from phoenix
what are the flights from pittsburgh to denver
show flights leaving miami to cleveland on us air that leave after noon
please give me a list of all the flights between dallas and baltimore and their cost
what does fare code y mean
ground transportation in phoenix
okay could you tell me what flight leaves dallas to san francisco by united airline
show me all flights from denver to san francisco next wednesday which leave after noon
is there a flight from atlanta to san francisco that stops over in denver
show departures and arrivals in atlanta for american airlines
find me the earliest flight from boston to atlanta and the latest return from atlanta to boston within the same day
i want to fly from milwaukee to orlando on either wednesday evening or thursday morning
i want a flight originating in denver going to pittsburgh and atlanta in either order
show me the flights from dallas to atlanta
what flights are available from denver to san francisco
what is the cost of a flight from boston to denver
show me the earliest flight from san jose to pittsburgh that serves a snack
could you please give me the round trip fare from denver to atlanta
do you have a flight leaving boston at 645 am going to washington
what are all the flights into atlanta's airport
show me the flights from atlanta to denver on friday
what does fare code qx mean
i would like information on twa flights from washington to philadelphia
which airlines fly from boston to washington dc but stopover in some other city
ground transportation in oakland
list all afternoon flights on united airlines from san francisco to denver
show me all flights from san francisco to pittsburgh on a monday
what is the latest flight leaving boston to denver
okay i would like to know the type of aircraft used on a flight from cleveland to dallas please
please show me the flights from las vegas to detroit on the twenty eighth
what airlines fly from st. petersburg to milwaukee and from milwaukee to tacoma
i'd like to take a flight that begins in boston and lands at dallas fort worth but i'd like to stop over in philadelphia
give me the earliest flight tomorrow on united airlines from st. petersburg to milwaukee
american airlines from denver to milwaukee
what flight is available at noontime from boston to washington what flight is available around noontime from boston to washington
i need a return flight from philadelphia to boston
northwest flights with stops in denver
what is the first class fare from baltimore to dallas
could you please tell me the airlines that fly from toronto to san diego
what is the earliest flight from memphis to cincinnati on june thirtieth
show me the nonstop flights from dallas to houston
show me economy fares from dallas to baltimore
i would like a flight on continental airlines on august twentieth from washington to pittsburgh
do you have a flight on wednesday from denver to washington dc nonstop
what is ewr
i want to fly boston to san francisco
what flight leaves dallas for atlanta on august twenty seventh in the evening
wednesday morning flights between baltimore and newark
show me flights from dallas to pittsburgh
what flights are there arriving in chicago on continental after 11 pm
what is the lowest cost fare that delta has between boston and san francisco
i'd like to go from boston to san francisco
round trip air fares from pittsburgh to philadelphia less than 1000 dollars
does any airline have a jet flight between pittsburgh and baltimore
what is mco
show me the flights from newark new jersey to ontario international next saturday
i want to fly from dallas fort worth to philadelphia
show me flights between new york city and las vegas
how long does it take to get from atlanta airport into the city of atlanta
show me all first class prices from dallas to baltimore
is there a flight between san francisco and boston with a stopover in dallas fort worth
show me ground transportation information for san francisco
need an inexpensive flight from baltimore to san francisco
find the earliest flight from boston to oakland that serves breakfast
i'd like to fly from philadelphia to dallas to san francisco
show me all the direct flights from atlanta to baltimore
latest flight from houston to san jose
what're the flights from new york city to las vegas that arrive on a sunday
i would like to fly united airlines from washington dc to denver colorado
okay i need to see economy flights on united between dallas and baltimore
please show me flights from pittsburgh to atlanta on wednesday morning serving breakfast
i need information for flights leaving baltimore and arriving in atlanta
show me all flights from san francisco to pittsburgh which arrive in pittsburgh before 9 o'clock am tomorrow
show me the fares from dallas to san francisco
please give me flights available from baltimore to philadelphia
what are the flights on january first 1992 from boston to san francisco
flights from denver to baltimore between 10 am and 2 pm
what ground transportation is there in atlanta
list nonstop flights from baltimore washington to oakland that arrive between 445 and 515 pm
show flights from baltimore to san francisco between 6 pm and 8 pm on friday
i want to fly from denver to san francisco
coach fares only weekdays for denver to boston
what are the coach fares for flights from newark to la leaving after 3 pm
from philadelphia to toronto
i would like a nonstop flight from philadelphia to pittsburgh
what are my choices of flights leaving early afternoon from minneapolis to indianapolis
what is the cheapest flight flying from boston to atlanta before 8
list possible round trip daily flights between boston and oakland
please give me round trip fares from baltimore to philadelphia
find a flight from long beach to st. louis stopping in dallas
please list the flights from st. paul to kansas city on friday night that serve meals
what is lowest cost air fare available for a flight from dallas to baltimore arriving on july fourth
can you show me the flights from baltimore to dallas
i need flight information on saturday for a flight from philadelphia to dallas
show me the flights from denver that go to pittsburgh and then atlanta
what is the earliest flight you have leaving boston heading to philadelphia
what are the least expensive flights from denver to atlanta
what kind of ground transportation is there once i get to dallas
show me the flights that go from atlanta to washington on thursday mornings
find a flight on delta from philadelphia to san francisco
do you have any flights from boston to dallas fort worth that stop over in philadelphia
what is ff
show all nonstop flights from boston to san francisco
what kind of ground transportation is available in denver
i would like to travel from indianapolis to houston
find travel arrangements for a round trip flight from boston to pittsburgh
please list the tuesday flights from atlanta to st. louis
show me all flights from atlanta to san francisco
what is the cheapest fare i can get from dallas to denver
what is the latest flight from salt lake city to st. petersburg
chicago to san francisco on continental
could you show me all the flights from oakland to salt lake city
what cities are served by canadian airlines international
san francisco to philadelphia please
flights from nashville to seattle
what flights are available friday afternoon from philadelphia to oakland california
tell me about flights from toronto to salt lake city leaving toronto between 530 and 7 pm
what kinds of ground transportation is available in dallas fort worth
requesting flight information from boston to denver on wednesday
can you list all flights departing from toronto and landing in san diego with a stopover in denver
all flights from denver to pittsburgh leaving after 6 pm and before 7 pm
list flights from phoenix to detroit on wednesday
what is the distance between pittsburgh airport and downtown pittsburgh
show me the flights from love field to any other airport
find a flight from charlotte to las vegas that stop in st. louis that serve dinner and i want to find the airline for this flight
list all flights from washington dc to tampa florida
can you tell me the cheapest one way fare from boston to san francisco
what airlines are there
i would like a flight between denver and san francisco leaving from denver in the afternoon and arriving at 5 pm it must be a nonstop flight
is there an airline that advertises having more flights than any other airline
phoenix to denver
what is the lowest fare from denver to atlanta
all flights from boston to washington dc on november eleventh
flight from nashville to cleveland
i would like to see the flights from baltimore to philadelphia please
i want a flight on twa from boston to denver
can you list flights from boston to washington with the lowest one way fares that leave on saturday
give me flights that arrive in baltimore from atlanta denver and pittsburgh
all flights leaving washington dc to san francisco that are first class
i need a flight from baltimore to seattle
what are the ground transportation services in philadelphia
what does fare code qo mean
ground transportation washington
show me the latest flight to love field
what airlines fly between boston and atlanta
what is american's last flight from boston to washington dc on july twenty first
show flights from boston to denver on wednesday morning
show me all flights from philadelphia to boston on monday which serve a meal and arrive before noon
list all daily flights between boston and oakland and between oakland and boston using delta airlines
i need a flight from ontario to los angeles on a thursday
what are the fares from dallas to san francisco on flight dl 217
what are the flights from montreal to chicago
list daily flights of united airline from denver to baltimore with first class service
is there ground transportation from the atlanta airport to downtown atlanta
please show me early morning flights from atlanta to philadelphia on wednesday
what flights from baltimore to san francisco arrive before 8 pm in san francisco
okay could you get me a round trip ticket from indianapolis to kansas city
show me the flights from miami to denver
what is the earliest flight flying from pittsburgh to atlanta on july fifth
find a flight between denver and oakland the flight should leave in the afternoon and arrive near 5 pm the flight should also be nonstop
what ground transportation is available in newark
i want a flight from philadelphia to dallas with a stop in atlanta
i need information on flights from kansas city missouri to salt lake city utah i am interested in only those flights on delta airlines
when is the first flight leaving from oakland to boston
flights from phoenix to las vegas
tell me about flights leaving from atlanta and going to charlotte north carolina next monday i need to know about flights that arrive in charlotte between 415 and 530 pm
show me delta flights from dallas to denver
in denver what kind of ground transportation is there from the airport to downtown
give me a flight from philadelphia to denver on sunday
show me all fares between philadelphia and san francisco that are less than 200 dollars one way
explain meal codes sd d
i want the flights from denver to pittsburgh
what are all flights from boston to denver
show me the cheapest fare from dallas to baltimore
i'm trying to fly from denver to boston and i want a flight that serves a meal
what's the cheapest fare from san francisco to baltimore
list the round trip flights from st. paul to san jose
what's the earliest flight i can get between boston and dallas
i'd like to know what type of plane flies from boston to dallas fort worth after 530
could you please show me all the weekday flights between denver and dallas
i'd like to fly from columbus to nashville tomorrow morning
which of the flights from pittsburgh to baltimore on july twenty fifth 1991 carries the smallest number of passengers
show me all flights from new york to miami leaving on a tuesday and show me all flights from miami to new york leaving on sunday
list the takeoffs and landings at general mitchell international
can you give me a list of the flights from atlanta to boston
show me the first class fares from baltimore to dallas
flight information from denver to san francisco
can you tell me how to get from the airport in philadelphia to downtown
flights from baltimore to philadelphia please
show me the flights from los angeles to pittsburgh which arrive at pittsburgh on monday
what are the flights dallas to boston on monday morning
i'd like to book an flight on american airlines from boston to san francisco with one stop in pittsburgh
shortest flight from ontario california to orlando florida
flights between new york and miami
show me city served both by nationair and canadian airlines international
what flights go from pittsburgh to newark after 823 in the morning
show me all flights from san francisco to la guardia nonstop
list all daily flights between boston and oakland as well as boston and oakland using american airline
show me about the ground transportation in boston
please tell me how many nonstop flights there are from boston to atlanta
list the flights from philadelphia to dallas on american airlines
show me the fares for delta flights from dallas to san francisco
what type of aircraft are used on flights from cleveland to dallas that leave before noon
do you have a night flight from washington to boston on august twenty seventh
what nonstop flights are available from oakland to pittsburgh
are there any flights next monday morning from pittsburgh to san francisco
please show me the return flights from miami to new york
ground transportation in baltimore
show me flights from denver to atlanta on june sixteenth
show me the cheapest flights from san francisco to boston
what are the rental car rates in san francisco
explain fare code qx
i would like to fly from pittsburgh to san francisco
i'm trying to find a flight from columbus to phoenix through cincinnati
show me the flights from salt lake city to st. petersburg on wednesday
show me all ground transportation in washington dc
i'd like a ticket from denver to atlanta with a stopover in pittsburgh is this possible
show me the airlines that fly from san francisco to boston
do you have a flight from atlanta to baltimore nonstop on a boeing 757 arriving baltimore around 7 pm
show me flights available from atlanta to baltimore leaving on monday morning
can you list all flights from toronto to san diego
please give me direct morning flights from pittsburgh to atlanta
is there limousine service available at baltimore airport
show me the flights from toronto to salt lake city which leave toronto after 6 pm
can i get a rental car in dallas
i need a listing of flights from new york city to montreal canada departing thursday in the morning
i'd like to find the cheapest one way fare from baltimore to denver
show me flights from baltimore to philadelphia please
how much does the american airlines flight 71 from dallas to san francisco cost
what is the earliest flight arriving in charlotte from st. louis on friday
show me the cheapest flights round trip from new york to san jose
first class round trip airfare from indianapolis to memphis
tell me about ground transportation at san francisco
show flights from denver to oakland that arrive after 12 o'clock
please list the flights from dallas fort worth to dc baltimore on july twenty third
i want to fly from philadelphia to dallas to san francisco on monday july eighth
how many nonstop flights going from dallas to oakland july twenty seventh
show me the flight with the smallest seating capacity which leaves pittsburgh and arrives in baltimore on june fourteenth
flight from long beach to columbus on twenty seventh
what are the classes of service for continental airlines
what is the earliest flight from boston to bwi that serves a snack
show me flights from washington dc to san francisco with a stopover in denver
what airlines flies out of atlanta
list flights from houston to memphis june twenty ninth
i need a late flight from san francisco to boston on wednesday
what type of aircraft leaves from boston to washington dc at 9 am
flights from baltimore to san francisco
show me all flights that arrive in philadelphia from baltimore denver or pittsburgh
i'm looking for flights from pittsburgh to philadelphia leaving before 9 am
what is the distance from boston airport to boston
i'd like the cheapest one way fare from boston to atlanta please
show me flights between new york city and las vegas on sunday
what is the cheapest one way fare from boston to baltimore
weekday flights from san francisco to denver
show me the nonstop flights from nashville to st. louis
i'd like to find a flight from miami florida to las vegas nevada that would arrive before 4 pm on sunday
show me the lowest price from dallas to baltimore
i'd like to book the cheapest one way flight from denver to pittsburgh on july fifteenth
how many flights are there between san francisco and philadelphia on august eighteenth
please list all available flights from oakland california to philadelphia on wednesday
how much is a first class ticket from baltimore to san francisco
list all flights from new york to las vegas that fly nonstop on sunday and list flights from memphis to las vegas that fly nonstop on sunday
show me the latest flight from las vegas to denver
i want information on flights from atlanta to washington dc give me information on flights after 4 pm on wednesday
i need to fly from kansas city to chicago leaving next wednesday and returning the following day
i need a flight from st. petersburg to miami for thursday
list the cheapest one way flight from miami florida to charlotte north carolina
are there any flights on us air from pittsburgh to atlanta on wednesday
what is the least expensive flight from atlanta to boston
what are the flights from orlando to kansas city
show me the flights from baltimore to dallas
show first flight from boston to philadelphia
i would like the earliest morning flight from atlanta to philadelphia on wednesday morning
list types of aircraft that fly between boston and san francisco
i want to fly from boston to san francisco
first flights from pittsburgh to atlanta on a thursday
please list the friday night flights from st. paul to kansas city
what are the seating capacities of planes between pittsburgh and baltimore
i need a flight from kansas city to chicago that leaves wednesday and arrives in chicago around 7 pm
information on ground transportation from airport to downtown boston
what flights go from newark to boston after 5 pm
what flights go from boston to pittsburgh after 6 o'clock next tuesday
i want to fly from boston to baltimore
i'd like flights on american from philadelphia to dallas arriving before 1145 am
what is the earliest united airlines flight flying from denver to baltimore and arriving on july fourth
what flights are available from atlanta to oakland with one way economy fares
what planes does united use
show me the flights from denver to las vegas
list the flights between san jose and houston
find me flights that are nonstop between boston and dallas
find the cheapest one way fare from boston to oakland
i'd like a flight tomorrow from san diego to toronto
what are the flights from kansas city to burbank on saturday may twenty two on america west
show me the flights from philadelphia to baltimore
what are the early weekday flights from san francisco to pittsburgh
flights from indianapolis to seattle washington
flights from atlanta to washington dc on thursday morning
flights from phoenix to las vegas
now show me the flights from denver to philadelphia on a saturday
please give me the prices for all flights from philadelphia to denver airport next sunday
show me the flights from baltimore to boston
on eastern flight 825 flying from atlanta to denver can you tell me what type of aircraft is used on a flight when it leaves at 555
what flights from burbank to milwaukee leave burbank tomorrow
show all airlines flying from pittsburgh to san francisco
is there ground transportation from the milwaukee airport to the downtown area
i want to fly from atlanta to philadelphia nonstop
what is the cheapest flight from washington to san francisco on friday
could you give me the schedule of flights for american and delta to dfw on august fifteenth
what is the cost for these flights from baltimore to philadelphia
i want to travel from philadelphia to san francisco with a stopover in dallas
show me all flights both direct and connecting from dallas fort worth to either san francisco or oakland that depart after 7 pm
show me all flights from pittsburgh to dallas
dallas to san francisco leaving after 4 in the afternoon please
i'm trying to make a connection between denver and san francisco does delta airline fly between those two
is there a flight around 3 pm from charlotte to minneapolis
flights from long beach to nashville
what is the cheapest flight from long beach to memphis
show me all the flights from boston to denver that serve lunch
what is the latest flight leaving newark for los angeles wednesday
flight from philadelphia to dallas arriving before 4 pm on saturday
what is fare code f
how many fare codes belong to economy class
show me the cheapest round trip fare from baltimore to dallas
which northwest flights stop in denver before noon
what are the most expensive first class tickets between atlanta and dallas
fly from denver to philadelphia on continental
give me nonstop flights from new york city to las vegas
what is the cheapest fare one way between pittsburgh and denver
list daily flights from oakland to boston using continental airlines
what is the earliest flight that i can get from bwi to boston logan
what northwest airline flights leave denver before noon
list the nonstop flights from denver to washington dc
i would like a nonstop flight between pittsburgh and philadelphia leaving in the afternoon and arriving in the vicinity of 5 pm
show me the flights from pittsburgh to baltimore
do i get a meal on the atlanta to bwi flight eastern 210
is there an atlanta flight to denver connecting
what is the cheapest one way ticket from denver to pittsburgh
i want to go between boston and washington early in the morning
what are the flights from boston to san francisco
what's the last flight leaving from pittsburgh to oakland
all round trip flights between new york and miami that are first class
show me the flights from boston to pittsburgh on wednesdays and thursdays
what are the flights on january first 1992 from boston to san francisco
i'd like to have flight from denver to pittsburgh
show me all flights arriving to denver from oakland
give me the flights from milwaukee to st. louis leaving sunday morning
yes what flights will be used on july seventh in the morning from atlanta to boston
show me the flights from new york to los angeles with stop in milwaukee
show me flights from pittsburgh to san francisco
round trip houston to las vegas nonstop
what is the earliest flight from ontario to memphis
what's the lowest round trip fare from dallas to atlanta
what flights are available from denver to philadelphia on wednesday
show me airlines going from pittsburgh going to denver and then continuing to san francisco on monday
please show me all the flights from indianapolis to san diego tomorrow
all flights and fares from denver to pittsburgh on us air number 1039 on a thursday
list least expensive flight from dallas to baltimore
give me the flights from pittsburgh to los angeles thursday evening
how much is a first class ticket from washington to san francisco leaving on friday
give me the least expensive first class round trip ticket on us air from cleveland to miami
okay i need to get a flight from houston to seattle
what are the flights from kansas city to burbank on saturday may twenty two on southwest
please list the flight times from newark to boston
all flights from boston to washington
show me fares less than 400 dollars for flights from dallas to baltimore
a first class flight to san francisco on american airlines tuesday next week
show all flights between san francisco and philadelphia for september fifteenth
what is the earliest american airlines flight leaving philadelphia for dallas
i want all flights from atlanta to washington dc on thursday
what is the earliest flight from boston to philadelphia
show me the flights from baltimore to atlanta
i need to fly from washington to san francisco but i'd like to stop over at dallas can you tell me a schedule of flights that will do that
i would like to know if i fly on american flight number 813 from boston to oakland if i will stop enroute at another city
is there an airport limousine at the atlanta airport
please list the morning flights from kansas city to atlanta
from denver to baltimore
what's the cheapest one way flight from denver to pittsburgh
show me one way flights from milwaukee to orlando leaving on wednesday morning
what are the flights from cleveland to indianapolis on wednesday may twelfth on either twa delta or continental
how many cities are served by continental with first class flights
eastern flight 825 from atlanta to denver leaving at 555 what type of aircraft is used on that flight
show me the flights leaving from love field
what's the next smallest plane after a turboprop
give me the flights from baltimore to pittsburgh
information on american airline flights from washington to philadelphia early morning times of flight
show me flights from baltimore to philadelphia
on the flight from baltimore to san francisco on us air leaving at 420 what type of aircraft is used
i'd like the earliest flight information from boston to san francisco with a meal
which airlines have first class flights today
show me ground transportation information for pittsburgh
i want to fly from detroit to st. petersburg on northwest airlines and leave around 9 am tell me what aircraft are used by this flight and tell me the flight number
show me all flights that go from new york to miami on tuesday and go from miami to new york on sunday
information on flights from pittsburgh to philadelphia
show me all flights from philadelphia to san francisco with one stop in dallas
show me flights from denver to dc on wednesday
can you list all round trip flights from orlando to kansas city and then to minneapolis
show me the flights from love field
i want a nonstop flight from indianapolis to toronto that leaves thursday morning
show flights from denver to oakland arriving between 12 and 1 o'clock
what are the nonstop flights from kansas city to burbank arriving on saturday may twenty two
show me the cheapest round trip fares from san francisco to salt lake city
also show me flights from san francisco to pittsburgh on tuesday
what is the cheapest one way fare from san francisco to boston on wednesday august twenty first
show me all flights from san francisco to new york nonstop
we're going from denver to san francisco
show me the flights from miami to san diego with one stop in denver
nonstop or connecting flights from seattle to boston
show me flights from denver to boston on tuesday
what is the smallest aircraft available to fly on from pittsburgh to baltimore
show me flights from pittsburgh to dc
show me all flights from phoenix to milwaukee on wednesday
what are the flights from las vegas to burbank on saturday may twenty two
what's the first flight from boston to san francisco
show me all flights from new york to miami leaving on a tuesday and returning on sunday
please list all flights between boston and san francisco nonstop
show me the flights from denver to westchester county
what is the seating capacity of the various airplanes that united airlines uses
show me the flights from westchester county to cincinnati
what is the least expensive one way fare from boston to pittsburgh
what airlines fly from boston to san francisco
what does code yn mean
what flights do you have from baltimore to san francisco
is there transportation from the atlanta airport to downtown atlanta
is there a meal on delta flight 852 from san francisco to dallas fort worth
show me the airfare from pittsburgh to san francisco
give me flights from pittsburgh to baltimore
what is the last flight from dallas to boston
what flights go from philadelphia to san francisco with a stopover in dallas
please give me ground transportation information for denver
what ground transport is available in charlotte
what are the flights available between 10 am and 3 pm between pittsburgh and fort worth
please tell me the type of aircraft used from atlanta to denver before 12 o'clock noon
american flights from san francisco please
show me the flights from philadelphia to atlanta
display all fare codes
round trip fares from baltimore to philadelphia less than 1000 dollars round trip fares from denver to philadelphia less than 1000 dollars round trip fares from pittsburgh to philadelphia less than 1000 dollars
show me the flights next tuesday between philadelphia and san francisco
i would like to fly to denver for under 500 dollars please show me the airfares between pittsburgh and denver
what is as
can you list all the airlines that have flights from boston to san francisco
how can i get from boston to atlanta and back in the same day and have the most hours on the ground in atlanta
show me the flights leaving charlotte to atlanta around 7 pm next tuesday
i now need a flight from san jose to houston leaving on sunday the fourth
i'd like information on boston to washington
what ground transportation is available in pittsburgh
which airlines fly from boston to washington dc
show me the flights from baltimore to boston
what flights do you have from boston to pittsburgh on wednesday of next week after 6 pm
show me the flights out of love field
i need a flight from newark to los angeles leaving tomorrow evening
flights from montreal
what pm flights are available from philadelphia to pittsburgh
show me flights from denver to philadelphia
i'd like flight information between boston and washington september third
i'd like to fly from minneapolis to long beach two days from today in the early morning
how many fares are there one way from tacoma to montreal
show me the flights from atlanta to boston
list all the landings at general mitchell international
which northwest and united flights go through denver before noon
round trip fares from baltimore to philadelphia under 1000 dollars
morning flight from dallas to atlanta
what is fare code fn
i would like a flight from pittsburgh to san francisco on august twentieth
what are my meal options from boston to denver
i want to fly from miami to chicago on american airlines and arrive at around 5 o'clock in the afternoon show me all flights
show me all flights from pittsburgh which leave tomorrow and arrive in boston
flights from indianapolis to seattle
newark to cleveland
list flights from boston to san francisco that serve only breakfast
show me flights from los angeles to pittsburgh for tuesday
are there any flights from chicago to minneapolis on saturday on continental
all flights from boston to washington dc after 5 pm on november eleventh economy class
list all day time flights from pittsburgh to boston
when are the american flights from phoenix to milwaukee
give me the flights from washington dc to philadelphia for december second
boston to denver monday
show me the flights on delta or twa which go through atlanta
is there a plane from boston to washington
what ground transportation is available in san francisco
show afternoon flights from dallas to san francisco
shortest evening flight from tampa to cincinnati
i want to leave chicago next tuesday and arrive in detroit around 6 pm
all flights from pittsburgh to philadelphia that arrive at 6 o'clock next tuesday
find the latest flight from san francisco to atlanta that serves a meal
i would like to book a flight from baltimore to newark early in the morning on april ninth
flights from newark new jersey to cleveland ohio
show me the flights from boston to oakland
how much is the cheapest flight from denver to pittsburgh with a stop in atlanta
please list the flight times from pittsburgh to newark
show me the cheapest one way flights from dallas to san francisco leaving dallas after 4 pm
give me a flight from tampa to charlotte on sunday
i want a flight from los angeles to charlotte that leaves on a weekday morning
show me all direct flights from dallas fort worth to either san francisco or oakland
list types of planes that fly between pittsburgh and baltimore
please give me flights available from denver to philadelphia
show me flights leaving from dallas to baltimore
price of flight from cleveland to nashville
can you show me flights that are economy class from baltimore to dallas
what flights from st. paul to kansas city on friday with a meal
flights from montreal and phoenix to las vegas
show me the southwest airlines flights from san diego to san francisco
what are the prices of these flights
i would like to fly from boston to baltimore please tell me what are the times of the flights
can i see ground transportation from long beach airport to downtown
show me flights from atlanta to baltimore
i want a flight from pittsburgh to los angeles that departs after 6 pm on thursday
i'd like a first class flight from denver to baltimore on january first
flight on monday from philadelphia to oakland california early morning
first class fares from dallas to baltimore please
i would like information on flights from san francisco to pittsburgh leaving after 8 pm monday night
show me the price of all flights from atlanta to washington dc
what kind of aircraft is used on the first class american airlines flight from philadelphia to san francisco with a dallas stopover
on flight us air 2153 from san francisco to baltimore what time and what city does the plane stop in between
show me all flights out of boston on june twentieth that have business class
how many flights arrive at general mitchell international
i'd like to know if you have any flights from denver to philadelphia
round trip flights from salt lake city to cincinnati nonstop flights if possible
what flights go from dallas to san francisco before 6 o'clock sunday afternoon
show me the earliest flight from denver to las vegas
delta flights from san francisco please
show me a list of flights from boston to atlanta leaving after noon and arriving before 7 pm
leaving washington going to san francisco the latest flight
please give me the cheapest flight from denver to pittsburgh
i would like information on flights from oakland california to dallas leaving on sunday morning
what airlines fly from new york to milwaukee to los angeles
what are the afternoon flights between washington and boston
please give me flight schedules from pittsburgh to philadelphia
does american airlines fly from boston to san francisco
please give me flight schedules from baltimore to philadelphia
are there any nonstop flights leaving from dallas to baltimore july seventh with who united airlines
from denver to pittsburgh on april twenty first i need the cheapest flight
what is the earliest flight from boston to washington
what are my choices of flights to get from charlotte to minneapolis arriving about 7 pm in minneapolis
what flights leave from newark to los angeles in the afternoon
i'd like to find a flight between dallas and philadelphia
what is the cheapest way to travel round trip from milwaukee to san francisco
show me the airlines
is there any flight leaving washington around 3 o'clock for denver
what flights available between pittsburgh and baltimore on august eleventh
what does restriction ap 57 mean
flights from newark to boston
show flights leaving boston on wednesday morning and arriving in denver
on july twenty third all flights on american airlines from philadelphia to san francisco
i'd like to fly from denver to pittsburgh to atlanta could you find me the cheapest way to do this
what's the cheapest round trip fare between boston and washington
nonstop flights from new york city to las vegas on sunday
display all flights from st. petersburg and charlotte flights should leave after noon arrive after 5 pm nonstop flight
show me all daily flights between milwaukee and orlando
find me a flight from boston to san francisco with a layover in denver
how much does it cost to fly eastern airlines from atlanta to boston
i would like to fly from boston to denver early in the morning
list all the flights from charlotte to atlanta that return around 7 pm
i need a listing of flights from kansas city missouri to salt lake city utah
i'd like a flight from detroit to st. petersburg for tuesday
show me the airlines that fly from denver to san francisco
what flights are available from boston to denver
what flights do you have between pittsburgh and atlanta
i want to arrive in detroit around 6 pm and i'm leaving from chicago
show me what flights are available from baltimore to dallas with economy fares
show me the most expensive one way flight from detroit to westchester county
round trip fare from baltimore to philadelphia less than 1000 dollars
which airlines fly from toronto to san diego and have a stopover in denver
what are the coach fares from charlotte to la wednesday night
could you tell me what the abbreviation us stands for
could you give me a flight between pittsburgh and philadelphia
show me the flights from san diego to newark
can i have a list of all the thursday flights from baltimore to atlanta that leave after 1 pm
what is the latest flight from philadelphia to boston
what are the flights from baltimore to dallas on sunday afternoon
show me airlines with flights from pittsburgh to boston please
i'd like to know the earliest flight from boston to san francisco
list flights from philadelphia to dallas that stop in atlanta
show me one way flights from tampa to st. louis departing before 10 am
what ground transportation is available in denver
i need a thursday flight from pittsburgh to baltimore arriving in baltimore before 9 o'clock
list the number of flights arriving in dallas fort worth from boston before noon
what is the round trip fare on continental 1291 from dallas to san francisco and return
show flights from denver into san francisco
i would like a flight from washington to boston flight 324 on august twentieth
i need a flight from pittsburgh to new york departing after 5 pm
i want a list of flights from pittsburgh to baltimore on thursday that arrive in baltimore before 10 am
what flights does delta have from dallas to denver after 5 o'clock
what is the earliest flight from boston to san francisco on november seventh
i'd like information on a flight from denver to san francisco on united air
and what are the flights from nashville to tacoma on the eighteenth again
list flights from denver to baltimore
what ground transportation is available at the atlanta airport
does any airline offer dc10 service between denver and boston
i would like to fly from st. paul to san jose monday morning from san jose to houston tuesday morning and from houston to st. paul on wednesday morning
list all flights that leave from baltimore or denver or pittsburgh and arrive in philadelphia
what flights are currently available between boston and dallas fort worth
show me round trip fares from denver to philadelphia
list all american airlines flights from phoenix to milwaukee on wednesday
i need a connecting flight on continental on june fifth from chicago to seattle
which airlines are represented in the database
what is the first flight from boston to dallas
on monday i would like to travel from charlotte north carolina to phoenix arizona i would like to arrive in phoenix before 4 pm
what is the fare going from atlanta to boston one way on november seventh
list all flights arriving at general mitchell international
please show me airlines with flights from denver to boston stop philadelphia
what flights are there from atlanta to baltimore
list the flights from philadelphia to san francisco via dallas
which flight from pittsburgh to baltimore carries the smallest number of passengers
which airline has the smallest plane leaving pittsburgh and arriving in baltimore on july fourth
is there a flight leaving at 1505 from pittsburgh to baltimore on july twenty fifth 1991
what flights go from pittsburgh to denver after 2 pm
does continental fly from boston to san francisco with a stop in denver
what flights are there from baltimore to newark
show me the flights to and from love field
what is the cheapest flight from denver to pittsburgh on july twenty sixth
show me all flights from san diego to miami with a stop in denver
us 3724 baltimore to philadelphia what is the fare
list the three earliest flights from atlanta to philadelphia on wednesday
please list all flights from philadelphia to boston
okay show me all the flights to baltimore
show me fares from houston to las vegas
i need a flight from indianapolis to houston on twa
list all flights on continental departing on monday before noon from denver to chicago
now i need flights leaving from atlanta and arriving in philadelphia on wednesday morning
flights from dc to denver
please show me any united flights including connections between boston and san francisco at 5 in the evening
i would like information for flights from baltimore to dallas on early tuesday morning
may i have a listing of flight numbers from columbus ohio to minneapolis minnesota on monday
flight numbers from minneapolis to long beach on june twenty six
i need a flight from philadelphia to denver
give me american airlines from milwaukee to phoenix on saturday and sunday
show me flights from baltimore to dallas
find me the earliest flight from boston to denver that serves breakfast
show me the flights from st. petersburg to toronto that arrive early in the morning
show me all flights from atlanta to dallas round trip less than 1100 dollars
i want to make a round trip flight from washington to san francisco and return
which flights depart los angeles destination charlotte that leave on a monday morning
what stops does dl 838 make from san francisco to atlanta
show me all flights from boston to denver which arrive in denver wednesday before noon
i would like the first flight from toronto to montreal next friday
what is the cheapest flight from boston to san francisco
flights and fares from denver to oakland
what limousine service in los angeles
i'd like to go from boston to denver at 9 o'clock saturday night
i want a flight from san diego to indianapolis that leaves tuesday afternoon
now i'd like a schedule for the flights on tuesday morning from oakland no from dallas fort worth to atlanta
what does the fare code f mean
list all the airlines that fly into general mitchell international
show me flights from san francisco to atlanta
find me the earliest flight from boston to atlanta
show me the most expensive fare
please list all flights tuesday dallas atlanta
is there an airline that services boston dc and dallas
i'd like a flight from kansas city to los angeles that arrives in los angeles in the late afternoon
what are all flights from philadelphia to denver on wednesdays
what is fare code h
may i have a listing of flights from minneapolis to long beach california on tuesday
show me all flights between san francisco and philadelphia for september fifteenth
show me flights denver to washington on thursday
please list the flights from phoenix to san diego
i'm traveling to dallas from philadelphia
what kind of aircraft will i be flying on if i take a first class american airlines flight from philadelphia to dallas
do you have a flight from boston to fort worth
what is restriction ap57
please list united flights between boston and denver departing at 9 am
how far is the airport from downtown pittsburgh
show me the evening flights from philadelphia to atlanta
flights from nashville to seattle
ground transportation from airport in boston to downtown boston
does lufthansa fly between boston and oakland
list round trip flights from orlando to kansas city
flights from pittsburgh to newark
does united airlines fly from boston to dallas fort worth
how about flights from dallas to atlanta on wednesday morning
what is ewr
give me fares from atlanta to baltimore
find me a flight from atlanta to baltimore
what is the fare for flights from denver to atlanta
give me the flights and fares on december twenty seventh from indianapolis to orlando
show me all the prices of flights from baltimore to dallas
show me airline abbreviations
show me all nationair flights from toronto
show me evening flights to baltimore
please show me all one way first class flights from indianapolis to memphis
are there any flights from philadelphia to dallas which stop in atlanta
give me the round trip coach fare from baltimore to dallas
what is the latest flight from san francisco to washington
on a flight from san francisco to atlanta that leaves before 8 am is there such a flight
show morning flights from philadelphia to dallas
now please give me the latest flight tomorrow on twa from milwaukee to tacoma
list all the flights that fly into general mitchell international
can you list the earliest flights from oakland to salt lake city on thursday
what time does flight aa 459 depart
what ground transportation is available from the denver airport to downtown denver
list all flights from orlando to kansas city then to minneapolis
i'd like to go from detroit to san diego on wednesday evening june second
where does flight ua 281 from boston to oakland stop
i would like the time your earliest flight from washington to philadelphia
i would like an afternoon flight from denver colorado to dallas texas
what flights are available from pittsburgh to baltimore on july twenty fifth 1991
what does dfw mean
i would like an evening flight from pittsburgh to los angeles on june third
show me all flights to dallas that are less than 1500 dollars round trip
show me all flights from boston to denver which arrive in denver wednesday before 6
are there any nonstop flights from san francisco to boston on thursdays
is there ground transportation from the airport in denver to downtown
what ground transportation is there in dallas
flights from baltimore to dallas
flights from new york city to montreal
i would like a to know the type of aircraft leaving from atlanta bound to boston on friday this week
i'd like a flight tomorrow evening from nashville to houston that includes dinner for tomorrow
give me a list of flights between denver and oakland
all right what i'd like to do is find the cheapest one way fare from boston to denver
what are the cheapest flights from pittsburgh to atlanta
which airlines have flights from denver to pittsburgh
what airlines fly between san francisco and denver
houston airports
i'd like to get a flight from washington to oakland with a stopover in dallas fort worth for september fifteenth
and how can i get to the boston airport from downtown boston
what's the smallest plane that flies from pittsburgh to baltimore on eight sixteen
in atlanta i would like information on ground transportation
list all round trip flights between indianapolis and orlando on the twenty seventh of december
show me all round trips from new york to miami leaving on tuesday
what is the ground transportation available in the city of philadelphia
how do i get from boston to pittsburgh
i need a flight from boston to pittsburgh that leaves early in the morning
show me all flights from chicago to kansas city on thursday june seventeenth arriving in kansas city at around 7 o'clock in the evening
show me the flights from baltimore to philadelphia
what is the economy thrift fare from boston to washington
what is delta's schedule of morning flights to atlanta
what flights go from atlanta to washington dc on thursday
i'd like to know the shortest trip between boston and san francisco
may i have a listing of flights from minneapolis to long beach california on wednesday
now i need a flight on tuesday from phoenix to detroit
list the flights and departure times for flights leaving dallas fort worth for boston after 6 pm
is bwi washington
show me all daily flights between milwaukee and orlando
i'd like to fly from san francisco to boston with a stopover in dallas fort worth and i want to fly on delta airlines
show me flights from atlanta to baltimore
what is the cheapest flight from pittsburgh to atlanta one way
flights from denver to westchester county new york weekdays
show me flights from atlanta to washington please
are there any flights from boston to san francisco which stop in washington dc
show all nonstop flights from atlanta to san francisco
i want to fly from boston to denver with a stop in philadelphia
show the flights that leave philadelphia that go to atlanta that leave early on thursday morning
flights from newark to cleveland daily
show me flights leaving from baltimore to dallas
please list all the flights from boston to san francisco leaving before 10 am
please list the flight times from newark to boston
can you please show me the flights from pittsburgh to boston on wednesday of next week that arrive before noon
show me all flights from atlanta to san francisco which leave atlanta after 5 o'clock pm tomorrow
what is the fare on november seventh going one way from san francisco to oakland
show me all the information about the flight from baltimore to dallas which is listed dl 1055 dl 405
show me the flights available from dallas to baltimore august third
pittsburgh to atlanta please with a stopover in fort worth
what is the last flight from atlanta to boston
please list all united flights between pittsburgh and baltimore
i want to travel from pittsburgh to oakland around midnight could you give me the flights
show me the flights between atlanta and washington dc for wednesdays
what first class flights are available from denver to baltimore on july twenty fifth 1991
what is the first flight from boston to san francisco on saturday
i would like to see the flights from baltimore to philadelphia
what is mco
what does code y mean
is there a twa flight from las vegas to new york
list the flights arriving in atlanta from baltimore before noon on august fourth
hi i need to go from newark to nashville on american airlines leaving around 630 pm
what is the latest afternoon flight departing san francisco and arriving in boston on november ninth
show me all the united airlines flights leaving dallas
show me the flights
on april eighth i would like to book a flight from charlotte to baltimore
i need a flight from dallas to san francisco
what is united airlines service between boston and san francisco
how many first class flights does united have leaving from all airports today
information on afternoon flights from philadelphia to denver
what is the schedule of flights from boston to denver next monday
please show me flights from dallas to denver
i need a flight from los angeles to charlotte today
can you list the latest flights from oakland to salt lake city on wednesday
my question is i want to go to san francisco and i live in denver and i would like to fly on united airlines do you have an early flight
please show me the flights from washington to san francisco
show me the flights from baltimore to oakland
show me all the delta flights leaving pittsburgh between 12 and 4 in the afternoon
does any airline have an afternoon flight from atlanta to boston
i would like information on any flights from san francisco to pittsburgh arriving in pittsburgh before 8 am tuesday morning
please list fares for all the flights from atlanta to philadelphia on august the first
i'd like to see the flights from denver to philadelphia again
does dl stand for delta
i would like information on flights leaving atlanta in the afternoon arriving in dallas
what's the latest flight from san jose to houston
american airlines from phoenix to milwaukee
what does us stand for
find travel arrangements for a round trip flight from baltimore to pittsburgh after 8 o'clock pm before 10 o'clock pm
hi i want a round trip ticket to dallas
saturday flights from las vegas to phoenix
now i need flights leaving denver in the afternoon on wednesday and arriving in san francisco
show me all the flights between dallas fort worth and either san francisco or oakland that depart between 5 and 7 pm
i would like a flight from denver to pittsburgh
show me flights from baltimore to dallas
what flights from st. paul to kansas city on friday with dinner served
i need to fly from boston to denver on to san francisco and back
how can i get from the airport in pittsburgh to downtown
show me the flights leaving from love field
looking for a flight from dc to minnesota
i need to take ten people from phoenix to san diego please give me the flights during week days
what is the cheapest round trip fare from pittsburgh to atlanta
which airline can fly me from atlanta to denver to san francisco
what is restriction ap 57
list all flights on sunday from san francisco to pittsburgh nonstop
show me the latest nonstop flight from denver to washington dc
show me flights from baltimore to philadelphia arriving after 2100
please show me the flights from washington dc to san francisco california
what's the airport at orlando
show me the flights from all airports to love field
are there any direct flights from atlanta to philadelphia arriving in philadelphia about 12 noon
what's the price of the least expensive first class round trip ticket on us air from cleveland to miami
i need to go to san diego from toronto but i want to stopover in denver
how long does the ground transportation take from the salt lake city airport
i'd like a nonstop flight from atlanta to baltimore that gets in around 7 pm
please list the flights from denver to phoenix
okay just on november twenty third i want to fly from atlanta to denver and i need to know what flights are available
explain the fare codes
is there a flight on eastern airlines from boston to denver
i'm looking for a flight traveling from boston to denver one way and the cheapest way possible
flight from salt lake city to oakland california
show me a list of the flights from san francisco to boston
please list flights from atlanta to philly
what is the fare from boston to san francisco on united airlines flight 21
show me flights from denver to washington dc wednesday
find a flight from boston to washington on monday
how much is an economy ticket from washington to san francisco on september thirtieth
list all round trip fares from phoenix to washington
i would like the cheapest flight from boston to san francisco
i need flight information leaving atlanta and arriving in baltimore for monday
i want to fly united airlines from boston to denver
what kind of airplane is flight ua 281 from boston to denver
tell me about flights on american airlines from dallas to san francisco on june twenty ninth
on continental flight 1765 from boston to san francisco what type of meal is served
show me all the eastern airlines flights leaving pittsburgh between 12 and 4 in the afternoon
what does iah mean
are there any american airlines flights flying into pittsburgh between 12 and 4 in the afternoon
show me ground transportation in dallas please
please show me all airports in denver
please list all flights on united airlines and northwest airlines that go into denver and all flights on northwest airlines and united airlines that fly out of denver
show me all flights from orlando to san diego on a boeing 737
i would like to book a flight from chicago into seattle on june first on continental airlines
what is the latest flight in the day from baltimore to atlanta
show the flights from denver to san francisco
show me all nonstop flights between denver and oakland leaving after noon and arriving after 5 pm
show me the cities served by nationair
find me a flight on united from boston to san francisco with a stopover in denver
list the earliest flight from st. paul to san jose
what's the earliest flight from phoenix to salt lake city
i'd like to fly from philadelphia to san francisco with a stopover in dallas
what are the flights from boston to orlando
is there a flight from nashville to houston in the evening tomorrow
show me round trip fares from las vegas to houston nonstop
what is fare code f
flight from milwaukee to chicago
show me all the flights from denver to las vegas
what is the cost of united airlines flight 415 from chicago to kansas city thursday night
what is the earliest flight from boston that will arrive in denver
give me the flights for american airline from dallas to san francisco
find travel arrangements for a one way flight from san francisco to dallas
does midwest express serve cleveland
i would like to book a flight from baltimore to san francisco before 12 o'clock on tuesday
pittsburgh to boston saturday
does twa have a flight from indianapolis to houston arriving at 11 am
what are the cheapest round trip flights from denver to pittsburgh
does midwest express serve montreal
are there any flights from boston to san francisco which stop in denver
i'd like a return flight from baltimore to boston
what is the earliest flight from pittsburgh to san francisco
show me flights from pittsburgh to san francisco on sunday
what do you have on monday from dallas fort worth to oakland california
what is the cheapest flight from long beach to memphis
show me all flights from denver to philadelphia which leave next saturday afternoon
first class price san francisco pittsburgh round trip
show me the cheapest flights from atlanta to denver
show me all flights from san diego to phoenix on a boeing 737
what are the evening flights flying out of dallas and going to san francisco on american airlines
okay give me the flights that leave denver after 7 pm next monday arriving in boston
what do you have from philadelphia to dallas on saturday morning
give me the cheapest round trip flight from dallas to baltimore
flights from miami to cleveland
flights from cincinnati to salt lake city
list flights from montreal to washington with the lowest one way fares that leaves on saturday
wednesday morning flights between baltimore and newark new jersey
from toronto to atlanta in the afternoon
what flights has continental from atlanta
could you please show me all flights from milwaukee to montreal
list the delta airlines flights from boston to philadelphia
what is the least expensive flight from baltimore to san francisco
what does s designate as a meal
could you please tell me the first flight leaving baltimore to san francisco on a 747 on august twenty seventh
i'd like to fly from boston to oakland through denver
what are the first class fares from boston to pittsburgh on thursday
what is the earliest flight from boston to atlanta
how far is it from salt lake city airport to salt lake city
i would like to fly from dallas to denver on the morning of august twenty seventh leaving at 650
show me airlines between boston and san francisco
please list the cheapest flight from dallas to baltimore arriving on may seventh
show flights between boston and philadelphia
i want to leave oakland and arrive in boston at 5 o'clock in the afternoon
what flights are available on sunday to pittsburgh from san francisco
show me the airlines that fly between toronto and denver
what's the earliest flight from boston to bwi that serves dinner
show me the flights from boston to atlanta
give me a flight between boston and denver
please give me the united airlines flights from denver to baltimore that are the first class flights please
what flights are there between atlanta and denver
show me the flights from pittsburgh to baltimore arriving in baltimore on june fourteenth
show me all flights and fares from denver to san francisco
what first class airplane goes from philadelphia to san francisco and stops in dallas in the afternoon on monday
what flights leave after 7 pm from pittsburgh to philadelphia
flights from indianapolis nashville memphis to seattle
please show me flights from pittsburgh to boston on saturday morning after 8 am
i'd like a flight from montreal to san diego for sunday
list all flights from baltimore to atlanta after 12 noon thursday
show me a list of ground transportation at boston airport
philadelphia to san francisco with one stop in dallas please
please list for me the flights on united airlines between boston and denver
list flights from pittsburgh to boston leaving after 3 in the afternoon
i need a flight from san diego to indianapolis leaving in the afternoon on tuesday
what is the price of a one way fare from boston to denver on continental airlines
i need a flight from kansas city to chicago next wednesday that reaches chicago around 7 in the evening
show me one way flights from milwaukee to orlando wednesday
i'd like to see flights from baltimore to atlanta that arrive before noon and i'd like to see flights from denver to atlanta that arrive before noon
what flights leave after 7 pm from boston to pittsburgh
i would like to book a flight on continental airlines from chicago to seattle on june first
of the flights available from dallas to baltimore on august third which airline has the least expensive flight
give me the flights and fares on december twenty seventh from indianapolis to orlando
show me the flights from boston to baltimore
what is the cheapest fare from boston to san francisco
list for me only the united flights between denver and oakland
give me the flights and fares on december twenty seventh from orlando to indianapolis
what flights go from boston to dallas
does delta airlines fly from pittsburgh to atlanta
are there any flights next monday morning from pittsburgh to san francisco
i want a flight from atlanta to washington that leaves after 3 pm
i would like an afternoon flight leaving tuesday san diego to indianapolis
please give me information on a flight on april seventeen from philadelphia to boston as early as possible
list the earliest flights from st. paul to houston
i need to go from philadelphia to dallas
i would like a flight from nashville to st. louis that arrives in st. louis around 6 pm and is nonstop
list all the arriving flights at general mitchell international
okay i'm sorry could you tell me what flights leave atlanta and arrive in philadelphia around 5 o'clock
may i see all the flights from cleveland to dallas
do you have a flight from atlanta to boston
show me the flights from denver to westchester county
is there a thursday night flight from pittsburgh to san francisco on us air
show me flights going from san francisco to pittsburgh first class on monday of leaving after 12 noon
afternoon flight from denver to san francisco
what are the flights from atlanta to boston in the afternoon
what ground transportation is available at boston
on tuesday i'd like to find a flight from detroit to st. petersburg that arrives before 10 pm
all flights from charlotte to anywhere on us air
what airlines fly between atlanta and san francisco
what flights are provided by american airlines
show me the flights from philadelphia to dallas
okay does twa have a flight from dallas to san francisco
what's the lowest one way fare from pittsburgh to denver
how many stops are on all flights from boston to san francisco that depart before 12 o'clock noon
what kind of airline is flight ua 281 from boston to denver
now list for me only the united flights that flight from oakland to boston
what is the abbreviation d10
show me all flights from pittsburgh to atlanta which leave after 5 o'clock pm tomorrow
i'd like a flight from washington that stops in denver and goes on to san francisco
i'd like a list of all the flights from san francisco to pittsburgh on sunday please
show me flights on wednesday morning boston to denver for united airlines first class
how do i get from pittsburgh airport to downtown pittsburgh
what is the cheapest one way fare from denver to pittsburgh
what nonstop flights between boston and washington arrive after 5 o'clock pm
what is fare code h
which delta flights depart from san francisco heading toward boston after 12 noon
american flights from cincinnati to houston
what is the cheapest fare from dallas to denver round trip
dallas to oakland monday
what flights are there from milwaukee to phoenix on saturday
i need a flight from pittsburgh to los angeles thursday evening
give me flights that arrive in baltimore from atlanta
what're the flights from memphis to las vegas that arrive on a sunday
i would like an early morning flight on june first from chicago into seattle on continental airlines
round trip fares from baltimore to philadelphia under 1000 dollars
please show me the return flight number from toronto to st. petersburg
is there ground transportation in st. louis
what's the earliest flight from dallas to houston
list the american airlines flights from dallas to san francisco
fares between atlanta and boston
what is the fare on the first flight from atlanta to denver on thursday morning
i need an early flight from denver to san francisco please and i would like breakfast served on that
i'd like to see the fare code again qx
i would like to fly from pittsburgh to atlanta on us air
i want to leave boston at 838
show me airports near washington dc
what ground transportation is available from pittsburgh to downtown
what flights leave seattle on sunday on continental after 9 pm
what are the cities served by delta airlines
show flights from dallas to san francisco
what does the abbreviation dl mean
i need to know if there are any direct flights from st. petersburg florida to tacoma washington leaving preferably tomorrow morning
show me the cheapest flights round trip from new york to san jose arriving in san jose before 7 pm
i need ground transportation in dallas please show me what's available
show me the flights arriving at love field from all other airports
before 10 o'clock on tuesday is there a 747 that flies from baltimore to san francisco
what is the cheapest flight from atlanta to pittsburgh one way
please show me flights from dallas to denver
what is the code for business class
list aircraft types that fly between boston and san francisco
does northwest fly into denver
what is your least expensive fare between atlanta and boston
i would like to fly the cheapest rate available from pittsburgh to atlanta on wednesday morning
what's the lowest round trip fare from dallas to baltimore
what's the difference between fare code q and fare code b
i'd like to book a flight from atlanta to denver
what flights are there from los angeles to pittsburgh
list all flights from denver to philadelphia
what is the first class fare from indianapolis to orlando
find travel arrangements for a round trip flight from dallas to pittsburgh
is there a delta flight from boston to denver
what flights from new york to los angeles
which flights go from philadelphia to san francisco
what does d s stand for for meals
i'd like to book a flight from san diego to toronto
what flights are there from pittsburgh to dallas on wednesday morning
list the flights from philadelphia to dallas on american airlines
what airline is ac
list the flights from dallas to baltimore
which airlines fly between baltimore and san francisco
show me the afternoon flights from washington to boston
which flights arrive in st. louis from st. paul on thursday morning
do you have any airlines that would stop at denver on the way from baltimore to san francisco
show me the cheapest flights from dallas to baltimore
please show me all the flights from boston
what flights from atlanta to washington
give me the flights from miami to new york using tower air
what flights from houston to milwaukee on friday on american airlines
show me all the flights from baltimore to columbus
give me flights from atlanta to baltimore
what flights leave from phoenix to anywhere
show me round trip fares from san jose to salt lake city
show me all the flights on delta airlines and twa that go to atlanta in the morning
what are the flights from boston to baltimore
is there ground transportation from san diego airport to the downtown area
i want a flight from san francisco to denver leaving san francisco in the afternoon arriving denver around 5 in the afternoon
what is the latest flight from milwaukee to seattle tomorrow
show the flights from pittsburgh to san francisco again on monday
pittsburgh to atlanta wednesday
i want to fly from boston to san francisco
what flights from miami to indianapolis on sunday
please show me airlines with flights from denver to philadelphia
list ground transportation options at phoenix
all flights from boston to washington dc on november tenth
i need to go from boston to atlanta in the same day find me the earliest flight from boston
boston to pittsburgh
cheapest airfare from tacoma to orlando
what are the flights from san francisco to denver
i'd like to see all the one way flights from denver to pittsburgh
what's the earliest flight from san francisco to boston
show me the continental flights leaving chicago early saturday morning
list the flights on friday afternoon from philadelphia to oakland
show me all us air flights from atlanta to denver for the day after tomorrow
show me all the flights from denver to las vegas
list all the flights that depart from general mitchell international
what airline stands for hp
how can i get from the denver airport to downtown
on tuesday i'd like to fly from detroit to st. petersburg
show afternoon flights from houston to dallas
i'd like to see the flights from atlanta to washington dc
show me the schedule for airlines leaving pittsburgh going to san francisco for next monday
boston to pittsburgh wednesday
what airlines fly from boston to washington
i need a flight from denver to washington dc on wednesday
american flight 4400 from cincinnati to houston
like information on flights from san francisco to boston on thursday morning
last nonstop flight from los angeles to pittsburgh on monday night
list the flights from st. petersburg to toronto
please list am flights leaving san francisco boston
first flights and fares from pittsburgh to atlanta on a thursday
show me the flights from baltimore to oakland
i would like a ticket leaving from denver colorado to atlanta georgia with a stop in pittsburgh
i would like to know the latest flight on wednesday you have leaving from oakland to salt lake city which offers a meal
show me flights from pittsburgh to philadelphia
list flights from pittsburgh to baltimore on thursday morning nonstop
are there any flights from boston to san francisco stopping in denver
fine can you give me information on ground transportation in washington dc to downtown
how many first class flights does united have leaving from all cities today
show me all flights from indianapolis
how much is a first class round trip from atlanta to san francisco
what flight do you have from dallas to denver on august twenty seventh in the morning
show me a list of flights from san francisco to boston for august thirtieth
what airlines have business class service between boston and san francisco
list all takeoffs and landings at general mitchell international
what city is the airport mco in
what are all flights from pittsburgh to boston on wednesdays
does delta airline fly from denver to pittsburgh
show all flights with first class from baltimore to dallas
my destination is san francisco i live in denver i would like a flight on august thirtieth in the morning on any airline that will get me there
i would like to travel from boston to denver early in the morning
what is the cheapest flight from denver to oakland
how long does it take to get from denver to oakland
what is the cheapest one way fare between boston and oakland
what does mco stand for
please show me airlines with flights from boston to denver
all flights from san francisco to los angeles
what is the earliest flight leaving denver going to boston
find the flights that leave philadelphia and arrive in dallas by noon
i need a flight from san francisco to pittsburgh from pittsburgh to new york and then new york to san francisco
is there an airline that has a flight from philadelphia to san francisco with a stop in dallas
list all flights on united from san francisco to boston
what's the cheapest one way flight from oakland to boston
please list the rental car information in pittsburgh
i would like to fly from denver to pittsburgh on the cheapest flight possible
are there any nonstop flights from indianapolis to san diego on wednesday may twelfth
show me the airlines between boston and denver
i would like a twa flight from atlanta to san francisco with a stopover in denver
what are the lowest one way fares from atlanta to pittsburgh
from las vegas to new york a nonstop twa and fare
i need a flight from philadelphia to denver
flights from kansas city to cleveland and price
what is the earliest flight on friday from washington to san francisco
please list the flights from ontario california to orlando florida
list daily flights from boston to oakland using united airlines
show me all flights from baltimore or denver or pittsburgh that fly to philadelphia
i would like to fly from pittsburgh to atlanta
list all flights on united from san francisco to boston with fare code qx
show me flights from san francisco to denver on weekdays
does continental fly from denver to pittsburgh
list all nonstop flights from los angeles to pittsburgh before 5 pm on tuesday
show me all flights from san francisco to pittsburgh on friday
what flights leave denver before noon on northwest airlines
how many flights does delta have with a class of service code f
show me all flights from san francisco to boston on november tenth
show me all flights from san diego to new york using dc10
show me the flights on twa from atlanta in the morning
show me all flights from charlotte to philadelphia
do you have a flight from charlotte to atlanta on june first
newark to cleveland
show me the flights from san francisco to boston
please show me the cost of flight ua 201 from boston to denver and flight ua 343 from boston to denver
what flight do you have from san francisco to pittsburgh on the evening of august twenty seventh
what are the flights from boston to denver on tuesday october fifteenth
i'd like flight information from dallas fort worth to boston on tuesday
flights from newark to tampa on friday on us air
show me the flights from dallas to atlanta
i'm looking for ground transportation in dallas
what airline is ea the abbreviation for
is there a flight from atlanta to san francisco on november seventh at noon
what does ff mean
please show me united nonstop flights between boston and san francisco departing around 5 in the evening
what airlines have flights from boston to philadelphia that leave before 630 am
i need information on flights leaving philadelphia on friday arriving in oakland california
what flights from montreal to las vegas on saturday
please show me flights available from pittsburgh to atlanta on a weekday
show me the earliest flight on wednesday from baltimore to newark
what is the cheapest coach flight between dallas and baltimore leaving august tenth
how much does a first class round trip ticket from cleveland to miami on us air cost
find me the cheapest one way fare i can get from boston to denver
i need a flight from new york to montreal thursday may six arriving before noon
how about flights leaving san francisco and arriving in boston for any day
cheapest flight from miami to indianapolis
give me the flights from boston to san francisco leaving early today
what type of aircraft leaves from boston to washington dc at 9 am during a weekday
show all flights from miami to jfk
i want to fly from dallas to san francisco
what is the name of the airport in philadelphia
i'd like to see flights from baltimore to atlanta
i would like to arrange a flight from denver to pittsburgh
show me a list of flights from boston to dc arriving before 9 am on july twenty second
oakland to philadelphia saturday
show me all the saturday flights from pittsburgh to baltimore
list all round trip flights from indianapolis to orlando departing either on december twenty seventh or on december twenty eighth
show me all the flights to baltimore after 6 o'clock pm
one way flights from ontario to tacoma leaving before 10 am on any day and first class
need a flight from pittsburgh to denver
what flight goes from denver to baltimore first class on united airlines arriving on may seventh
what does fare code qo mean
do you have a flight from salt lake city to st. petersburg on june second
i would like to book a flight from chicago to seattle on june first
what airlines fly from philadelphia to san francisco
all flights to baltimore after 12 pm
what aircraft has the largest seating capacity
ground transportation in las vegas
what do you have tomorrow after 5 o'clock from atlanta to san francisco
ground transportation please in the city of boston between airport and downtown
show me the cheapest fare from baltimore to dallas
i would like direct coach flights from pittsburgh to atlanta
show me ground transportation in denver
what flights does delta have from denver to dallas after 5
show me flights from philadelphia to baltimore
what flights do you have available from denver dallas and pittsburgh into baltimore
round trip fares from baltimore to philadelphia under 1000 dollars
are there any flights from denver to atlanta which connect in pittsburgh
i want to fly denver to pittsburgh
please list all flights between boston and philadelphia operating on sundays
show me all the northwest flights from new york to milwaukee that leave at 720 am
what is ua
what is the ground transportation in san diego
what flights from any city land at general mitchell international
please give me a flight leaving boston going to washington arriving in washington at 5 o'clock in the afternoon
show me all flights on us airlines from boston to oakland california which leave after 11 o'clock am
i would like information on ground transportation in the city of atlanta from airport to downtown
i need one first class ticket from dallas fort worth to san francisco
please show me airlines with flight service from boston to denver from denver to philadelphia and from philadelphia to boston
what airlines fly between boston and san francisco and stop in denver
show me all flights from san francisco to washington dc
show me the flights from toronto to cincinnati
flights from memphis to seattle
do you have a delta flight to san francisco from denver on august thirtieth in the early morning
ground transportation in denver
which flights go from pittsburgh to atlanta in the evening
show me all flights from montreal to nashville
i'd like to take a flight from washington dc stop in denver and with my final destination as san francisco
i want to fly from boston to denver and i don't want any stopovers and i'd like to fly only during the afternoon
i'd like an early flight tomorrow from columbus to nashville
list all flights from boston to atlanta after 6 o'clock pm on wednesday
i'd like to arrange a flight from pittsburgh to atlanta
what flights are available wednesday afternoon from atlanta to san francisco
flight information from san francisco to pittsburgh
what flights are available from denver to philadelphia on monday
i need a flight from san francisco to boston that leaves after 7 am
is there a flight between oakland and boston with a stopover in dallas fort worth on twa
i need a flight from new york to toronto thursday may six arriving by noon
what is the total schedule for delta's flights to all airports
show me all flights from boston to denver which arrive in denver wednesday before noon
friday's flights between newark and tampa
what is the ground transportation available in fort worth
i would like information information on flights from san francisco to denver on thursday morning
please list all flights that leave denver before noon on northwest airlines
does united airlines fly from denver to baltimore
what is the cost of round trip ticket first class between oakland and atlanta
show me the list of flights from philadelphia to denver that leave in the afternoon
i want to see the cheapest flights from denver to atlanta
list the flights from salt lake city to st. petersburg
what northwest flights stop in denver
atlanta to pittsburgh
what is the price of a first class ticket from milwaukee to san francisco round trip
can you find out about the ground transportation available in atlanta
list flights leaving dallas on saturday and arriving in san francisco before 4 pm
can you list all flights from washington to toronto
are there any flights available from baltimore to dallas monday afternoon
give me all the flights from new york to miami round trip
please show me ground transportation in denver
how do you get from the airport to downtown dallas please
what time does the tuesday morning 755 flight leaving washington arrive in san francisco
hi i need to get a flight from memphis to salt lake city departing before 10 am
from phoenix to denver on a monday
show me cheap flights from baltimore to dallas
how many flights go from dallas to baltimore on july nineteenth
what ground transportation is available into washington
from sfo to denver
what flights from salt lake city to new york city arrive next saturday before 6 pm
show all wednesday morning flights from denver to boston
show me the flights from oakland to denver
show me all the night fares between philadelphia and san francisco
what flights from chicago to kansas city in the morning
list the nonstop flights from miami to washington dc
show me the ground transportation in denver
what are flights from boston to st. petersburg
could you please tell me the cheapest flight from boston to san francisco
please find the earliest possible flight from boston to denver
what flights from washington to toronto
what airline is the flight originating in atlanta on november seventh at noon and arriving in san francisco at 210 pm
show flights from san francisco to denver on wednesday and thursday
what are the cost of morning flights from atlanta to baltimore
flight information from oakland to denver
what is the price of flights from indianapolis to memphis
i want to fly dallas to san francisco on monday july eighth
i would like a us air flight from toronto to san diego with a stopover in denver please
give me the american airlines flights from phoenix to milwaukee on wednesday
which airlines fly between boston and pittsburgh
can you tell me the cheapest flight between boston and san francisco
what flights are between boston and atlanta on july thirty first
baltimore to philadelphia wednesday
i live in denver and i'd like to make a trip to pittsburgh
please list the flights from toronto to washington dc
what am flights are available from pittsburgh to boston
can you tell me what flights you have from baltimore to dallas
show me the flights from denver to philadelphia
i'm interested in flying from atlanta to boston i'd like to fly during breakfast
can you tell me which flight from dallas to baltimore has the least expensive fare
show me flights from denver to washington dc on a wednesday
what are the afternoon flights leaving from dallas to san francisco on american airlines
all united airlines flights with stopovers in denver
list daily flights from oakland to boston using delta airlines
from pittsburgh to baltimore
please list ground transport in san francisco
i would like the evening schedule of flights from san francisco to washington
what's the cheapest of the dallas to atlanta flights which are after 2 in the afternoon
which united airlines flight flies across this continent and leaves from boston goes to dallas and makes a stopover in philadelphia
show me all flights from denver to pittsburgh which serve a meal for the day after tomorrow
what is the last flight from san francisco to boston this wednesday
what are the flights from boston to atlanta
i want a flight from cincinnati to burbank on american airlines and leave in the afternoon
show me flights from dallas to houston and from houston to dallas
what is the earliest flight departing san francisco and arriving in boston on november ninth
show me the airlines that fly from toronto to san francisco
what is the flight number for the continental flight which leaves denver at 1220 pm and goes to san francisco
please list all flights from san francisco to pittsburgh on sunday
could you tell me about flights from philadelphia to dallas that arrives in the early afternoon
show me the cheapest flights from baltimore to dallas
tell me about ground transportation between the dallas fort worth airport and downtown dallas
what is the distance from san francisco international airport to san francisco
show me flights from denver to philadelphia
please list all flights on united airlines out of denver before noon
what flights from kansas city to chicago next wednesday arrive at chicago at about 7 pm
all flights and fares from pittsburgh to dallas round trip after 12 pm less than 1100 dollars
what aircraft is co 1209
show me one way flights from milwaukee to orlando
okay i'm looking for a flight from tampa to st. louis leaving before 10 am any day
is there ground transportation in dallas from the dallas airport to downtown dallas
list the morning flights between atlanta and dallas
all flights from dallas to san francisco
what ground transportation is available in denver
us air flights departing from charlotte around 1 pm
list flights from san francisco to pittsburgh
show me all flights on southwest airlines from san diego to san francisco
list all nonstop flights from los angeles to pittsburgh which arrive before 5 pm on tuesday
what are the most expensive first class tickets between boston and san francisco
i'd like to know the earliest flights from boston to atlanta georgia
show me the flights from baltimore to seattle
how many airports does oakland have
i want to depart washington april twentieth to atlanta least expensive fare
show me the earliest flights from boston to denver on wednesday
what are the latest flights from boston to dallas on the evening of july seventh
what are the coach fares from la to charlotte monday morning
i need the cheapest direct flight from atlanta to denver leaving on may seventh
are there any flights from atlanta to denver
show me flights from philadelphia to san francisco on wednesdays
show me all flights to philadelphia in the evening
show me all flights from atlanta to washington with prices
i'd like to go from st. paul to kansas city on friday with a meal
what are the flights from denver to oakland
i'm sorry i wanted to fly twa is there a flight between oakland and boston with a stopover in dallas fort worth on twa
show me all flights that depart from san francisco and go to either boston philadelphia or baltimore
show me a list of all the airlines that offer business class service
ground transportation in san jose
show me all the flights that arrive in baltimore from anywhere between 1850 and midnight
give me flights without fares from atlanta to baltimore
show me the flights from baltimore to oakland
show me the flights arriving at love field
list the flights from denver to baltimore
can you please tell me the type of aircraft used flying from atlanta to denver on eastern flight 825 leaving at 555
can you show me the price of a flight to washington from atlanta on thursday morning
what is fare code h
i would like to leave early in the morning
show me the flights from philadelphia to baltimore in the morning
show me the flights into love field
could i have listings of flights from new york to montreal canada leaving on wednesday
show me all the direct flights from baltimore to atlanta
from denver to baltimore
show me ground transportation in boston
give me a list of flights between pittsburgh and baltimore
what is the cheapest ticket from baltimore to san francisco on friday august thirtieth
what is the earliest flight leaving boston and going to washington on september third
looking for a flight from toronto to san diego
what is the cheapest flight on american airlines from cleveland to miami
list the cheapest round trip flights from orlando to kansas city
show me the flights from dallas to boston
how much is a flight from washington to montreal
i want the cheapest flight from pittsburgh to atlanta
what are the evening flights from atlanta to baltimore
how many united flights are there from san francisco please
flight information on january twenty third from denver to san francisco
list the flights arriving in baltimore from denver on august third
list flights from philadelphia to san francisco via dallas
i want a flight from houston to memphis on tuesday morning
what flights from los angeles to minneapolis
show me all flights direct only from boston to san francisco or oakland that arrive before 10 am local time
can you tell me the latest evening flight from atlanta to denver on july seventh
show all flights and fares from pittsburgh to san francisco
i wish to fly from boston to washington please find an airline for me
what is the schedule of ground transportation from washington airport into downtown
show me the flights from boston to atlanta and the return flights from atlanta to boston
show me flights from pittsburgh to atlanta on monday afternoon
bring up flights from milwaukee to orlando on wednesday night or thursday morning
what is the cost of a round trip ticket flying from boston to dallas dallas to oakland leaving july first
from seattle to salt lake city
i live in montreal and i want to travel to chicago then indianapolis and then return home
i would like to travel from washington dc to pittsburgh on august twentieth
flight 417 from cincinnati to dallas
please show me the flights from denver to baltimore between 10 am and 2 pm
show me flights from dallas to san francisco on wednesdays
what does ewr mean
flight between st. petersburg and charlotte
give me a flight from charlotte to baltimore on tuesday morning
i'd like to book the cheapest one way flight from denver to pittsburgh
leave flight from boston to atlanta leave boston approximately 1 pm
oakland to denver
i'd like the cheapest cost fare to fort worth from boston
name the earliest flight from boston to san francisco
when is the first flight in the morning from boston to denver
what are the flights from indianapolis to san diego on wednesday the twelfth
show me the flights from boston to pittsburgh on wednesday
show me all flights from san francisco to atlanta
what are all flights to denver from philadelphia on sunday
all right do you have a flight from atlanta to boston
show me the flights from st. petersburg to toronto that arrive before noon
list all flights at general mitchell international
give me return flights from philadelphia to san francisco for december third
flights from san jose to st. paul
i actually want to go from ontario to westchester via chicago
show me flights from denver to philadelphia arriving after 2100
saturday or sunday flights between milwaukee and phoenix american airlines
what is the flight number of the earliest flight between boston and washington dc
i'd like a flight on american from newark to nashville
show me the shortest flight from boston to denver which arrives in denver wednesday before noon
next sunday flights from miami to cleveland after 1200 hours
also give me a list of flights between oakland and boston
what is the yn code
what time does the earliest flight which goes from atlanta to denver leave
i would like to find out the ground travel available in atlanta
what flights are there from san francisco to philadelphia daily with economy class
show flights from san francisco to denver on a thursday
tell me about ground transportation at toronto
what flights from atlanta to st. louis on tuesday arriving around 230 pm
can you give me the latest flight from atlanta to denver on july seventh
i'd like to see all flights from baltimore to philadelphia
flights from newark to cleveland
what are the flights from boston to washington
i'm looking for a flight from boston to denver that has no stopovers and is only in the afternoon
do you have an 819 flight from denver to san francisco
ground transportation in dallas and boston
flights from pittsburgh to baltimore between 10 am and 2 pm
list all nonstop flights from la to pittsburgh before 5 pm on tuesday
i would like the cheapest one way fare from dallas to denver
show me the flights from san francisco to dallas on continental airlines
i'd like to fly from denver to atlanta with a stop in pittsburgh
what flights leave pittsburgh after 5 pm on thursday and arrive in los angeles
i would like to see the economy fares for denver to philadelphia
which cities are serviced by both american and delta airlines
show me all flights from san francisco to boston philadelphia or baltimore
what is the fare on american airlines flight 928 from dallas fort worth to boston
what is the latest departure from boston to pittsburgh on the seventh of july
i need a reservation from baltimore to san francisco
i need a flight from philadelphia to san francisco next wednesday
show me ground transport in seattle
cheapest airfare from orlando to tacoma
are there any limousines or taxi services available at the boston airport
what does the fare code f mean
delta flights to dallas please
what flights are available with q fares from boston to pittsburgh
show me all flights from new york to miami leaving on a tuesday
how many people fit on a 72s airplane
list daily flights from oakland to boston using twa
what airlines fly from dallas to baltimore
flights from montreal and phoenix to las vegas arriving at the same time
what flights from orlando to tacoma on saturday
on november twenty third what flights are available between boston and denver on american airlines
what's the cost of a first class fare from philadelphia to san francisco
what flights are there from newark to chicago on continental
is there ground transportation from the pittsburgh airport to downtown pittsburgh
i'm trying to find a flight from kansas city to burbank on saturday the twenty second
how much is a round trip fare from indianapolis to seattle
oakland to san francisco please breakfast flight
i'm going to leave philadelphia and i want to go to san francisco and i want to fly first class american and i want a stop in dallas can you please tell me what type of aircraft you will be flying
what is the first class fare on united flight 352 from denver to boston
all flights to baltimore after 6 pm
please list the morning flights from philadelphia to toronto
i also need service from dallas to boston arriving by noon
i will need a car at new york
give me the cheapest flight from dallas to baltimore on saturday
show me first class fares from dallas to baltimore
listing of all first class flights from washington to san francisco
on a breakfast flight from philadelphia to dallas via atlanta
give me the list of flights for continental between denver and boston
also show me the first flight from atlanta to denver on a thursday
i need a round trip flight from cincinnati to san jose california
what is the cheapest fare from washington to san francisco leaving on september thirtieth
explain the fare code q
show me all flights from pittsburgh to boston both direct and connecting that depart pittsburgh after 7 pm
what flights are there from milwaukee to phoenix on saturday
i would like to see the flights from denver to philadelphia
i'm looking for a flight that goes from ontario to westchester and stops in chicago
philadelphia to dallas saturday
flights from pittsburgh to baltimore between 10 am and 2 pm
denver to atlanta
what flights between dfw and oakland arrive in oakland between 1133 am and 43 pm
find travel arrangements for a round trip flight from boston to pittsburgh arriving after 8 pm
the latest flight from baltimore to oakland please and i'd like a meal with that
what is the earliest flight from memphis to las vegas
show me the flights going from pittsburgh to san francisco on monday
does the phoenix airport have ground transportation to and from downtown
show me the flights from cincinnati
show me all all flights from pittsburgh to atlanta on wednesday which leave before noon and serve breakfast
list a round trip fare from kansas city to minneapolis flights
what ground transportation is available in baltimore
define airline hp
what is airline us
please list all flights into denver before noon on united airlines and northwest airlines
i need a flight tomorrow from atlanta to baltimore
please show me flights from san francisco to dallas
flight from boston to baltimore
what is the last flight from san francisco to dallas fort worth
flights from cleveland to miami
list all round trip fares from st. petersburg to washington
show me flights from boston to denver on tuesday
what flights leave baltimore for boston after 6 o'clock on friday
list all nonstop flights on wednesday from baltimore to newark before noon
how much does it cost to fly directly from philadelphia to san francisco on american airlines
show me the flights from pittsburgh to los angeles on thursday
what is the earliest flight in the morning leaving boston for baltimore
what are the morning flights from boston to philadelphia
please list the flights leaving from st. louis to st. paul after 10 am
information on flights from denver to philadelphia
what flights land at general mitchell international
what flights are there from tampa to charlotte
what type of airplane is an m80
flights from pittsburgh to los angeles thursday evening
ground transportation san francisco
which airlines have flights between charlotte and newark
please list all the takeoffs and landings for general mitchell international
give me flights that arrive in baltimore from denver
what time are the flights leaving from denver to pittsburgh on july seventh
is there a flight from boston to atlanta which leaves boston in the afternoon and arrives close to 5 pm
do you have one to denver from philadelphia
what are the cheapest flights from denver to pittsburgh that stop in atlanta
flights from atlanta to dallas in the afternoon
show me flights from new york to miami
find a flight from toronto to san diego with a layover in san francisco on air canada
show me the flights from dallas to baltimore
what are the restrictions on the cheapest one way fare between boston and oakland
how much does it cost to fly on delta from dallas to baltimore
give me sunday nonstop flights from memphis to las vegas
list all flights from seattle on continental which depart after 430 pm
now get me from pittsburgh to denver
what is the cheapest round trip fare between boston and san francisco
list daily flights from denver to baltimore
flights from cincinnati to los angeles departing after 718 am
i'd like to fly from philadelphia to dallas through atlanta
san francisco to denver
i would like to book an early morning flight from tampa to charlotte on april sixth
are there delta flights leaving atlanta
what's the cheapest one way flight from oakland to washington dc
what does the fare code yn mean
i want a flight from philadelphia to dallas that at least has one stop
what are the flights that leave detroit and arrive in chicago around 7 pm next wednesday
give me a flight from tampa to charlotte on sunday
i'd like a flight from columbus to phoenix stopping in cincinnati and serving dinner what's available
show any flights leaving san francisco on sunday and arriving in pittsburgh
what does hou mean
show me the flights from philadelphia to atlanta georgia
list all arrivals from any airport to baltimore on thursday morning arriving before 9 am
what flights are available tuesday afternoon from pittsburgh to atlanta
list the shortest flight from san jose to houston
list flights from atlanta to boston on wednesday afternoon and thursday morning
show me the economy flights from baltimore to dallas
list the flights arriving in baltimore from pittsburgh on august third
i would like to see the economy fares for pittsburgh to philadelphia
what's a flight that goes from baltimore to seattle
tell me about flights from indianapolis to houston
list flights leaving denver and arriving in orlando on saturday departing after 12 pm
is there a flight departing from san francisco and arriving in oakland on november seventh in the evening
give me all the flights from new york to miami round trip with costs less than 466 dollars
show me the daily flight schedule between boston and pittsburgh
find travel arrangements for a round trip flight from dallas to pittsburgh
i need a flight leaving pittsburgh next monday arriving in fort worth before 10 am
show flights from memphis to las vegas
what are the two american airlines flights that leave from dallas to san francisco in the evening
which airlines serve pittsburgh
nonstop flights seattle to kansas city
i would like to fly from boston to san francisco
show me all flights from miami to new york
what ground transportation is there from the airport in atlanta to downtown
what flights are there from phoenix to milwaukee
i would like the first flight into houston from dallas on march first and the last flight from houston to dallas on march first
i'd like information on a flight from atlanta to denver a morning flight
show flights from san francisco to denver on either wednesday the twenty third or thursday the twenty fourth
i'd also like to see a list of the flights from pittsburgh to atlanta
flights from kansas city to cleveland on wednesday arriving before 5 pm
show me flights from pittsburgh to philadelphia
show me the list of us air flights between boston and dc
what airlines from washington dc to columbus
what are the united airlines flights between baltimore and denver on august twelfth
i would like the flight number and the time for the cheapest fare that is the least expensive first class fare from san francisco to pittsburgh leaving after 8 pm monday night
i would like to fly from atlanta to san francisco with a stopover in dallas
what flights leave phoenix on american airlines
american flights to houston from cincinnati
which airlines fly from boston to washington
i want to travel from atlanta to baltimore early in the morning first flight
what are connecting flights from chicago into seattle on june fifth
what are the flights from new york city to las vegas
show me ground transportation in denver
what are the flights available after 3 pm between denver and san francisco
earliest flight on american airlines from washington dc to san francisco
show me the flights arriving at love field
what is the cost of limousine service in philadelphia
what do you know about car rental in denver
what's the earliest flight leaving denver for pittsburgh
show me flights from baltimore to philadelphia
i'd need information please on a flight from washington dc san francisco california
show me flights from san francisco to denver after 4 pm
what does the fare code qx mean
show me the one way fares from san diego to miami nonstop
what is fare code h
i'd like a united airlines flight on wednesday from san francisco to boston
all flights from baltimore to atlanta between 1 o'clock and 3 o'clock in the afternoon
fares from dallas to baltimore
how many airlines fly from new york to los angeles by way of milwaukee
flights from houston to los angeles departing after 1026
is there a flight from baltimore to san francisco with a stop in denver on twa
tell me about flights from atlanta to charlotte north carolina leaving on monday and arriving in charlotte
is there a flight between washington dc and san francisco on us air at 8 am
what kind of plane is used on the earliest flight from boston to san francisco afternoon
what ground transportation is there in oakland
flights from oakland to san francisco
what evening flights do you have available from baltimore to philadelphia
show me all the flights to baltimore from denver or philadelphia or pittsburgh
what are the cheapest one way flights from denver to atlanta
show me all prices of first class from baltimore to dallas
how much is the 718 am flight from las vegas to new york twa
is the american flight 813 from boston to oakland a nonstop flight
show me all flights from kansas city to chicago on june sixteenth arriving around 7 o'clock in the evening
i'm looking for a flight that goes from san jose to houston on may thirtieth and that leaves after noon
show me the flights from philadelphia to boston
flight from washington dc to salt lake city
show me the flights from san francisco to las vegas
what flights go from newark to boston after 1024 in the morning
which airline has more business class flights than any other airline
do you have any flights from pittsburgh to boston on wednesday of next week in the morning
which airlines have first class flights today
what is the ap57 restriction
which flights on northwest and united airlines stop in denver before noon
daily flights from newark to cleveland departing 5 o'clock pm
i would like to make a round trip between washington and san francisco
what airlines service pittsburgh airport
show me round trip flights from denver to baltimore that offer first class service on united
i would like an early morning flight from chicago into seattle on continental airlines
philadelphia to boston monday
i'm interested in round trip flights from boston to washington
show me all flights from montreal
can you tell me about flights from san jose to nashville on saturday afternoon
list all the takeoffs and landings at general mitchell international
what flights go from chicago to seattle on saturday on continental airlines
what is the cheapest round trip flight from denver to atlanta
are there any united airlines flights between boston and dallas
show nonstop flights from new york to miami on a tuesday which cost less than 466 dollars one way
what does ea mean
show flights first class on american from philadelphia to dallas fort worth
i'd like to know the ground travel available in fort worth
give me the list of flights for continental airlines between boston and denver
what does restriction ap 57 mean
now i need a one way flight from pittsburgh to denver
show me flights between milwaukee and phoenix on saturday or sunday american airlines
define airline ua
i would like a flight from denver to pittsburgh
what's the first flight from dallas to houston
show me the cheapest flights from san francisco to philadelphia
flights from kansas city to cleveland on wednesday before 5 pm
how many stops on continental 1765 from boston to san francisco
i'd like to book the cheapest flight from atlanta to denver on august first
list all flights from boston to san francisco on united airlines
yes i'd like a flight from long beach to st. louis by way of dallas
what is the lowest fare from denver to pittsburgh
flights from newark new jersey to minneapolis
show me the flights from baltimore to oakland
i'm requesting flight information on a flight from san francisco to pittsburgh on friday
how many different flight classes are there
what kind of ground transportation can you offer me in seattle
show me the flights from tacoma to miami after 6 pm
i need to fly from boston to denver this monday
which airline has the most arrivals in atlanta
show me the fares for a first class ticket from baltimore to dallas
how many cities are served by delta airlines with first class flights
give me the first flight from boston to atlanta
what is the first flight from boston to atlanta
show me the evening flights from philadelphia to baltimore
what are all the flights available between pittsburgh and dallas fort worth
is there a flight from pittsburgh to baltimore that arrives between 6 and 7 pm
show me one more time the first class fares from baltimore to dallas
what flights are there from memphis to las vegas
ground transportation baltimore
i would like the fare on the us air 1039 from denver to pittsburgh on april twenty
what car rentals are available next sunday from denver airport
show me all flights direct and connecting from boston to pittsburgh that arrive in pittsburgh before 10 am
list all tuesday night flights from boston to denver
what's the lowest round trip fare from atlanta to bwi
i would like a flight from philadelphia to dallas that makes a stop in atlanta
is there a flight leaving san francisco to denver
i would like to fly from atlanta to denver on september fifteenth
i need to take ten people from denver to san diego with a stopover in phoenix please give me the flights
what flights go from philadelphia to dallas via atlanta
what is the round trip fare on continental 1291 from denver to san francisco and return
what flights are there on sunday from seattle to chicago
ground transportation oakland
i need to find a flight from philadelphia to san francisco that has a stopover in dallas
show me the flights from san diego to washington dc
i would like your rates between atlanta and boston on september third
show me boston ground transportation
what is the cost for a one way trip from pittsburgh to atlanta
could you please find me the cheapest one way fare from boston to philadelphia
from baltimore to san francisco
show all flights from baltimore to dallas on monday evening and the cost of each flight
show me the airlines between toronto and denver
all flights pittsburgh to baltimore on thursday arrival by 10 am
what is the cheapest fare for a one way flight from boston to atlanta
i'd like an afternoon flight from atlanta to san francisco with a stopover in denver arriving i'd say about mealtime
wednesday from baltimore to newark
philadelphia to boston saturday
i'd like a flight on july ninth from orlando to kansas city in the afternoon
show me the flights from cincinnati to denver
i am looking to get one air fare from baltimore to san francisco on a 747 leaving august twenty seventh
i would like to fly from denver to pittsburgh on united airlines
show me all fares from new york to miami leaving on a tuesday
show all flights on united airlines from san francisco to denver to washington dc
how long is the flight from atlanta to san francisco at noon on november seventh
what is the last flight of the day to leave baltimore for boston
which flights from pittsburgh to atlanta have the lowest coach class fares
what flights are available from philadelphia to denver on sundays
can you tell me the afternoon nonstop flights departing from atlanta to boston
show me all the flights from new york to milwaukee
show me all flights from milwaukee to orlando one way
what airlines leave from washington
i would like a flight from kansas city to st. paul departing at 4 pm
please show me the round trip flights from st. petersburg to toronto
show me the flights from denver to san francisco
list the flights from baltimore to seattle that stop in minneapolis
show me the last flight available in the evening from boston to dc on july twenty first
leaving denver flying to san francisco before 10 am what type of aircraft is used
code ff
show me all flights from new york to miami on a tuesday with round trip fares under 932 dollars
i want to fly from milwaukee to orlando
all flights and fares from atlanta to dallas round trip after 12 pm less than 1100 dollars
show me the flights on american airlines from fort worth to denver on the evening of july eleventh
please list the flights from chicago to kansas city
list the nonstop flights on wednesday june second from miami to washington arriving in washington between 1115 am and 1245 pm
i would like to know flights on june fifteenth from long beach to columbus after 12 noon please
is there a round trip flight from baltimore to denver connecting in dallas
i'd like to find the cheapest flight from boston to san francisco
what cities does continental service
show me the flights that leave on thursday mornings from atlanta to washington and include whether meals are offered and what the prices are
what flights are available from denver to baltimore first class on united airlines arriving may seventh before noon
can you show me the list of flights that fly from washington to san francisco via dallas
all right what us air flights leave from indianapolis to san diego after 130 in the afternoon
i want to travel from washington dc to philadelphia on tuesday morning
i need the flights that leave denver after 7 pm next monday and fly to pittsburgh
hi i'd like a flight on alaska airlines from san diego to toronto please
ground transportation in westchester county
flights from indianapolis to seattle
i would like information on ground transportation city of boston between airport and downtown
what is the transportation time from the airport to boston
list flights from san francisco to denver on friday
i would like to travel from boston to denver
which airlines fly into and out of denver
show me the flights before 8 am on august second from boston to denver on delta
may i see all the flights from washington to san francisco please
i need information on a flight from boston to denver
i'd like to go from boston to san francisco with a stop in dallas
show me flights from philadelphia to denver on a monday
show me the fare for delta flight 296 from atlanta to philadelphia
looking for a flight to salt lake city
are they all nonstop flights from kansas city to st. paul
what is the least expensive flight today from atlanta to san francisco
from atlanta to washington dc
what kind of airplane goes from philadelphia to san francisco monday stopping in dallas in the afternoon first class flight
can you show me evening flights from nashville to houston that serve dinner
show me the flights from cincinnati to denver
i would like to find a flight from charlotte north carolina to las vegas i would like a stopover in st. louis
what is the cost of a flight from boston to san francisco
show me all the flights from atlanta to baltimore on any airline on thursday
what is the cost of a ticket going from denver to boston july twenty fifth 1991
list types of aircraft that connect boston and san francisco
find travel arrangements for a round trip flight from dallas to pittsburgh arriving after 8 pm
what does fare code qo mean
what flights are there from new york to las vegas
flights between boston and philadelphia that arrive after 2 o'clock and before 5 o'clock on tuesday
what is the earliest flight from washington to atlanta leaving on wednesday september fourth
what flights are available from boston to denver on wednesday in early morning
what flights are there from boston to denver on monday morning
what is the cost of flight dl 106 from philadelphia to boston
what is the price of a first class ticket from atlanta to san francisco
i'd like the flights from san jose to nashville on the morning of friday june third
what are my choices of flights from las vegas to new york
what is the cheapest one way fare from boston to washington
i'd like also to book a one way flight from pittsburgh to atlanta the cheapest one on july twentieth
what round trip tickets are there from cleveland to miami on us air that arrive before 4 pm
what does it cost to fly from boston to san francisco on united airlines flight 21
what are the flights between pittsburgh and san francisco
what is the least expensive flight available from dallas fort worth to san francisco
i like to see the information for flights from pittsburgh to san francisco leaving pittsburgh after 12 pm
is there a flight from philadelphia to oakland with a stop in dallas
what flights from denver to pittsburgh arrive before 8 in the morning
are there any early flights from atlanta to washington on thursday mornings
what are the classes of service on delta airlines
i'd like to make a trip from washington to san francisco
all round trip flights between new york and miami coach fare
okay i want a flight originating in denver going to pittsburgh
what's the cheapest first class airfare from pittsburgh to san francisco
what are the flights from baltimore to dallas on sunday night
show me the latest flight from denver to boston
show me flights from new york to miami
what price is a limousine service to new york's la guardia
please list all flights on united airlines and northwest which go to denver
what flights are between washington and san francisco
i would like to fly from atlanta to boston arriving in boston at 5 pm
flights from charlotte to baltimore
is twa flight 497766 from st. petersburg to milwaukee with one stop available tomorrow morning
show me the latest flight on wednesday from atlanta to washington dc
is there a flight on united airlines from boston to denver
i need a flight from chicago to dallas on continental on june fifth
please show me all round trip flights from new york to miami
what is the latest flight leaving pittsburgh returning to denver
what is your earliest flight from boston to washington on august twenty seventh
show me the continental flights with meals which depart seattle on sunday for chicago
what are the flights from dallas to san francisco on tuesday october first
what time are flights from denver to san francisco on continental airlines
what's the earliest flight from atlanta to boston
i would like to fly from denver to atlanta by way of pittsburgh
show me the itinerary of the connecting flight from boston to denver that departs boston at 10 am
flights from philadelphia to oakland
nonstop flights from seattle to denver
i need information on ground transportation between airport and downtown in the city of boston
i'd like to see the flights from pittsburgh to philadelphia
show me all flights from charlotte
what flights are available from pittsburgh to baltimore on july twenty fifth 1991
what are the flights from boston to san francisco
i need 2 first class tickets from dallas fort worth to san francisco
show me flights between denver and baltimore
list all flights on continental leaving seattle on sunday after 430 pm
list daily flights from boston to atlanta
show me the flights from denver to philadelphia
what airlines have nonstop early afternoon flights from boston to denver
give me the flights leaving denver august ninth coming back to boston
what flights from st. paul to kansas city on friday with a meal
list the flights arriving in boston from atlanta on august fifth
where does continental fly to from chicago
what're the cheapest nonstop flights from new york to miami one way
i want to travel from philadelphia to boston on wednesday afternoon
i would like to fly from boston to baltimore in the afternoon what flights are there
show me the flights from boston to philadelphia
i would like to fly from salt lake city back to st. petersburg on wednesday
what are the flights in the month of december from atlanta to denver which stop in boston
what flights from philadelphia to atlanta
what are the flights from washington dc to denver
i need information on a flight from san francisco to atlanta that would stop in fort worth
show me all flights from philadelphia to baltimore
what is bur
what is the first flight that travels from atlanta to baltimore that serves lunch
show flights between denver and san francisco for september seventeenth
do you fly a 747 from baltimore to san francisco
i need a flight from atlanta to baltimore and this flight should arrive at 7 pm please
i would like to know the types of ground transportation from the airport to las vegas
what is the earliest flight leaving boston on july first to dallas on july first
i would like to fly to san francisco early in the day
give me the flights from kansas city to chicago leaving next wednesday arriving at chicago at about 7 pm
morning flight from atlanta to philadelphia
i'd like to get a flight leaving san francisco and arriving at philadelphia pennsylvania
list the flights on wednesday from denver to washington arriving in washington between 1115 am and 1245 pm
list all flights from atlanta to dallas on friday
all northwest flights with stopovers in denver
on usa air how many flights leaving oakland on july twenty seventh to boston nonstop
i need a flight from pittsburgh to new york leaving at 5 pm
i would like to book a flight for august twenty seventh with us air from baltimore to oakland what flights do you have available
i need a plane that arrives in san francisco by 9 o'clock pm on friday and leaves from baltimore
what flights leave from phoenix to nashville on american airlines
show me all flights which leave pittsburgh tomorrow and arrive in baltimore after 5 o'clock pm
find me a flight leaving boston at 12 o'clock
show me the flights from indianapolis to orlando with round trip fares less than 1288
am flights from dallas to san francisco
i'd like to see all flights from denver to philadelphia
what is the cost of a first class ticket from baltimore to dallas
how do i get downtown from the toronto airport
from san francisco to denver
what is booking class c
show me the car rentals in baltimore
what are the flights from boston to san francisco leaving tomorrow
show me flights from new york to miami
show me the united flights from denver to baltimore
does american airline fly from denver to pittsburgh
show me the names of airlines in atlanta
how much does flight ua 281 from boston to denver cost
show me american flights from dallas to san francisco
what is the earliest american airlines flight that i can get first class from philadelphia to dallas
requesting flight information for flight from boston to baltimore on tuesday
which airlines have flights from san francisco to washington by way of indianapolis
all right give me the flight times in the morning on september twentieth from pittsburgh to san francisco
list all flights from minneapolis to long beach on saturday
i'd like to find a flight from tampa to montreal that makes a stop in new york
what flights go from dallas to denver after 3 pm
how much is the ground transportation between atlanta and downtown
show me all flights from san francisco that go to boston baltimore or philadelphia
show me the flights from denver to baltimore or washington dc that arrive before or around noon
show me round trip fares from pittsburgh to philadelphia
show me flights from atlanta to washington
i need a flight to atlanta this afternoon
information on american airlines flight from washington to philadelphia
show departures from atlanta for american
flights on american from phoenix to chicago on wednesday
what is the distance from la guardia to new york's downtown
is there a delta flight from boston to san francisco that stops in denver
show me the earliest nonstop flight from dallas to houston
what flight do you have from atlanta to dallas on august twenty seventh in the morning
i want a flight from toronto to montreal that leaves early friday morning
what is the cheapest round trip fare from atlanta to pittsburgh
pm flights leaving san francisco arriving boston
can i fly from boston to baltimore washington
flights from jfk or la guardia to cleveland
i'd like an early morning weekday flight from san diego to phoenix
which airlines fly between boston and pittsburgh
all flights from pittsburgh to philadelphia next tuesday arriving near 6 o'clock
show me the flights from salt lake city to st. petersburg late night on tuesday
sure i want to go from philadelphia to dallas
i'd like information on flights between philadelphia and san francisco with a stop in dallas
early morning flights between cincinnati and tampa
please find a flight on delta from philadelphia to san francisco and give me the flight numbers
what flights leave from nashville to milwaukee
show me all the flights arriving in charlotte around 5 pm next monday please
list flights from atlanta to boston leaving between 6 pm and 10 pm on august eighth
flights from pittsburgh to baltimore between 10 am and 2 pm
what is mco
what is the meaning of restriction ap80
list the cheapest flight from charlotte to memphis
show me a list of flights on july twenty second leaving dc to dallas leaving dc after 6 pm
what flights leave phoenix on wednesday evening and arrive in milwaukee
how many cities are served by eastern with first class flights
show me flights from philadelphia to baltimore
list the flights arriving in atlanta from boston between 4 and 8 pm
show all flights from pittsburgh to san francisco on july twenty eighth 1991
list nonstop flights from baltimore washington airport to oakland that depart in the afternoon
flights from newark new jersey to cleveland
list all flights going from boston to atlanta before 7 am on thursday
i want to make a trip from washington to san francisco
show me all flights to dallas from san francisco atlanta and pittsburgh
does american airlines fly from pittsburgh to atlanta
show me the list of flights from dallas to baltimore on american and delta airlines
okay i would like to fly from atlanta to philadelphia
i'd like to travel from boston to baltimore on us air 269 please tell me the times
show me all meals on flights from atlanta to washington
do any of the san francisco to boston flights leave on friday
i need to make reservations from denver to boston
how many passengers fit on a d9s
sunday's flights between tampa and charlotte
lowest fare from san francisco to san diego
economy fares new york to miami round trip
what is the fare on the thrift economy flight from boston to san francisco
flights from denver to philadelphia include fares
what is the flight schedule of the f28 from pittsburgh to baltimore
show me all the flights arriving around noon in washington dc from denver
list all flights leaving denver on continental on sunday after 934 pm
show me the flights that go from tacoma to miami
show me the flights from boston to san francisco stopping in dallas on american airlines
i need a flight from boston to pittsburgh
i would like some information on flights leaving boston to atlanta
what is fare code h
i would like information on flights leaving atlanta and arriving in dallas
show me the flights from san diego to newark by way of houston
how many cities are served by lufthansa with first class flights
now show me flights from pittsburgh to philadelphia
what flights do you have from ontario
list nonstop flights from houston to dallas which arrive after 8 pm
show me round trip fares from new york to miami
what is ff
give me a list of the morning flights from atlanta to boston
i'd like to see flights from baltimore to atlanta that arrive before noon and i'd like to see flights from denver to atlanta that arrive before noon
what is the price of a one way fare from atlanta to boston
what is the ground transportation available in boston
list nonstop flights from baltimore to newark on wednesday before noon
what united airlines first class airfare flights are available from denver to baltimore on july three
show me all flights from pittsburgh to san francisco
yes i live in washington and i want to make a trip to san francisco which airlines may i use for this trip
all flights and fares from dallas
what're the cheapest flights from new york to miami
i want to fly philadelphia to san francisco on july eighth
what are all flights from san francisco to philadelphia with stops in pittsburgh
what flights from st. paul to kansas city on friday with breakfast served
what type of aircraft leaving after 2 pm from boston to oakland
are there any other cities that i can fly from boston to dallas through that i can get a flight earlier than 1017 in the morning
i would like a flight from philadelphia to dallas on american airlines
what are the prices of the flights from dallas to baltimore
flights from milwaukee to orlando one way
i need to fly between philadelphia and atlanta
show me the latest flight from salt lake city to phoenix
are there any flights from denver to atlanta with stops in pittsburgh
give me the flights from pittsburgh to los angeles on thursday evening
i would like the time of all flights from san francisco to pittsburgh on sunday
oakland to philadelphia
what price is a limousine service in boston
how much is a flight from washington to boston
what flights from kansas city to chicago arrive at chicago at 7 pm next wednesday
what is the fare from philadelphia to pittsburgh business class one way
give me flights from denver to baltimore
flight from denver to philadelphia saturday afternoon
what flights arrive in chicago on sunday on continental
show me all flights from san francisco to pittsburgh
i'd like to find the cheapest fare from atlanta to dallas
show me the flights on delta to atlanta in the morning
what airlines go to pittsburgh
may i please see airlines and flight numbers from new york to toronto on the same date june seventeenth also arriving in toronto before noon thank you
what does ea mean
what is the cost of a round trip ticket first class between oak and atl
i would like information on a flight between washington and san francisco with a stopover in dallas
can you show me flights from baltimore to dallas
i would like to fly from pittsburgh to atlanta
list all flights from boston to san francisco with more than 3 stops
what is restriction ap 57
show me flights from philadelphia to oakland on friday
list all flights from denver to philadelphia
flights from las vegas to montreal
could you list for me the flights that leave oakland on sunday and arrive in dallas
tell me the flights from dallas to baltimore
show me the flights from denver to pittsburgh and atlanta
what flights are there from atlanta to oakland on thursday with in flight meals
show me the flights from boston to san francisco that arrive in the afternoon
show me ground transportation for boston
give me the flights with the fares on december twenty seventh from indianapolis to orlando
show all united flights between boston and philadelphia
show me the type of aircraft that cp uses
what ground transportation is there from denver
i'm interested in flights from denver to pittsburgh
what is the airfare between denver and pittsburgh
show me the fare for us flight 3357 from philadelphia to baltimore
i'm looking for flights from oakland to atlanta leaving before 1045 am
show me the flights from san francisco to boston
ground transportation dallas
do you have the fare for traveling from oakland airport to oakland downtown
please give me flights leaving san francisco and going to pittsburgh
show me all flights from denver to baltimore
give me a list of airlines in pittsburgh
what's the difference between fare code q and fare code f
find travel arrangements for a round trip flight from dallas to pittsburgh
i would like a flight from washington to boston on august twentieth at 324 pm
i need the earliest flight from denver to boston that serves dinner
show me the flights on sunday from tampa to charlotte
what is the cheapest round trip coach flight between dallas and baltimore leaving august tenth
show me flights from boston to san francisco
i'd like to go to boston from denver and i'd like to get there
flight from milwaukee to denver
show me all the flights on united leaving from boston
what is the schedule for flights between pittsburgh and boston on the evening of july ninth
what's the first class fare round trip from atlanta to denver
is there a round trip flight from baltimore to dallas connecting in denver
i'd like the first flight in the morning from boston to washington
i'd like a limo in denver on august seventh
what flights from kansas city to denver after 845 in the morning
please list all flights leaving on thursday morning from new york city to toronto
show me the flights from san francisco to boston on august thirty first
does midwest express serve indianapolis
what type of aircraft leaving philadelphia to dallas
what is the departure time of the latest flight of united airlines from denver to boston
please show me the flights from atlanta to denver
what is ground transportation between the san francisco airport and the city
flights from newark to cleveland daily 5 o'clock pm
which flights are between boston and baltimore washington
what flights are there from newark to seattle on saturday
what flights are available wednesday morning from boston to denver
is there ground transportation from the dallas airport to downtown dallas
are there any flights from denver to atlanta to pittsburgh
all am flights departing pittsburgh arriving denver
does midwest express serve nashville
how can i go from minneapolis to long beach late tomorrow
okay i'd like to fly from denver to pittsburgh
i live in denver and i'd like to make a trip to pittsburgh
i would like to see flights from denver to philadelphia
what is the cheapest way to fly from denver to oakland
i would like to fly from philadelphia to dallas
i'm interested in a flight from dallas to washington and i'm also interested in going to baltimore
i would like the least expensive airfare flight on sunday to pittsburgh from san francisco
i need a flight from denver to philadelphia
tell me which airlines have flights from pittsburgh to san francisco on monday september second
what are the schedule of flights from boston to san francisco for august first
what are the flights on tuesday october first from atlanta to baltimore
which airlines serve denver
i'd like to fly continental airlines between boston and philadelphia
does american airlines flight from long beach to st. louis stopping in dallas serve lunch
i'd like to find a nonstop flight from boston to atlanta that leaves sometime in the afternoon and arrives in atlanta before evening
show me flights from boston to denver on wednesday
show me the flights from boston to san francisco on united airlines
show me all flights from ontario to tacoma one way
is there a flight on delta airlines from boston to denver
how about april twenty seventh denver to washington
what's the fare from washington to boston
what northwest airlines flights leave denver before noon
i need to fly from pittsburgh to oakland and depart in the afternoon
what ground transportation is available in baltimore for the day after tomorrow
what airlines fly from boston to atlanta
what flights from atlanta to toronto
what aircraft is used on delta flight 1222 from kansas city to salt lake city
list all flights on continental leaving denver and arriving at chicago on monday before noon
on september fourth i'll be traveling from pittsburgh to atlanta can you tell me what flight would be the cheapest
what ground transportation is available at denver airport
tell me about flights from atlanta to charlotte next monday
please list the earliest lunch flight from columbus to phoenix
what flights leaving pittsburgh arrive in denver and leave after say 6 o'clock at night
show me flights between memphis tennessee and las vegas
what flights from tampa to cincinnati
what flights are available from pittsburgh to oakland airport
give me information on flights from atlanta to washington dc leaving on thursday before 0900
show me all flights from pittsburgh to dallas
show me the flights arriving around noon in baltimore from denver
i would like to fly on twa from baltimore to san francisco
how about arrivals for american in atlanta
hello i'd like a delta flight from atlanta to boston
all right would you let me know type of aircraft united airlines is using on the flights from denver to san francisco i would like to know the type of aircraft that they use on these flights before 10 in the morning
show me the earliest flight on august second from boston to denver that serves a meal
find me the latest flight leaving atlanta august seventh and arriving in denver
a breakfast flight from denver to san francisco please
please show me flights from pittsburgh to atlanta on wednesday morning serving breakfast
how many delta flights leave from washington
give me the earliest flight tomorrow from st. petersburg to milwaukee on a airline other than twa
i want to fly from boston to baltimore
what morning flights do you have between oakland and denver
how do i get from bwi to washington
does united airline have any flights from dallas to san francisco
which flights are serviced by american airlines
how many cities are served by twa with first class flights
i'd like to see all the economy fares from baltimore to philadelphia
show me information on ground transportation for dallas
show me the prices of first class tickets on us air round trip from cleveland to miami
flight from dallas to boston tomorrow
show me airports in washington dc
from los angeles to phoenix on a friday
what is the cheapest coach fare from dallas to denver round trip
list flights from philadelphia to dallas
what's the cheapest flight from atlanta to baltimore
ground transportation between airport and downtown in boston
names of airports
again i will repeat i want to make a one way flight from boston to atlanta will you tell me how much the fares are i would like the cheapest fare
flights from la guardia to jfk
what classes of service does twa provide
list the flights from st. paul to san jose and from st. paul to houston
what are the flights from pittsburgh to baltimore
what flights leave charlotte north carolina and arrive in phoenix arizona on monday before 4 pm
i would like to see the flights available from pittsburgh to san francisco for monday
show me all daily flights out of boston that have coach class
i need a flight on friday from newark to tampa
what is the latest flight from san francisco to boston
what flights are available from boston to dallas
does eastern have an early afternoon flight from boston to san francisco
show me flights from pittsburgh to philadelphia
airlines that fly to miami from new york on friday
show flights from denver to san francisco
tell me about the ground transportation in chicago
and flight from oakland to boston leaving after midnight
do the airlines still offer first class
what flights go from newark to boston after 5 pm
please give me the earliest flight tomorrow from st. petersburg to milwaukee
i need to fly from boston to baltimore please give me the times of your flights in the morning before 8 o'clock
hi i'd like to fly from columbus to phoenix and make a stop in cincinnati along the way
what is the cheapest flight from boston to atlanta
list all round trip fares from pittsburgh to washington dc
sfo to denver on monday november eleventh 1991
please list all the flights from boston to denver which serve meals
what is the cheapest flight from pittsburgh to atlanta
i'd like a flight from indianapolis to toronto leaving thursday morning nonstop
i would like to know the flights available from boston to denver arriving in denver by 8 o'clock wednesday morning
list all flights from denver to philadelphia
all northwest and united airlines flights with stopovers in denver
i'd like to have some information on a ticket from denver to pittsburgh and atlanta
show me one way flights from tampa to st. louis departing before 10 am first class
what is the cheapest fare from denver to pittsburgh
list the airlines that have nonstop afternoon flights from boston to oakland
find the earliest flight from boston to san francisco that serves a meal
i want to go from denver to atlanta round trip and make a stop at pittsburgh may i have the cheapest fare
what are the lowest one way fares from pittsburgh to atlanta
what is the coach economy class night service from boston to san francisco
what is the cost of the air taxi operation at philadelphia international airport
what types of meals are available
please list the cheapest flights from dallas to baltimore arriving on may seventh
show first flight from philadelphia to dallas
i would like to fly from boston to oakland what airlines fly from boston to oakland
is there a flight between philadelphia and denver that leaves philadelphia around 2 o'clock in the afternoon
show me all flights from san francisco to denver
show me the flight that leaves philadelphia in the afternoon and arrives in the evening in denver
what are the flights from denver to pittsburgh
on november twenty third of this year 1991 i'd like to fly from atlanta to denver and i'd like to fly on delta
what flights are there tomorrow from tacoma to san jose
what is a flight that goes from baltimore to san francisco and arrives at san francisco at 8 pm on a friday
i'd like a flight from burbank to tacoma washington
please list all flights from dallas to pittsburgh on july fourth 1991
list all flights arriving in pittsburgh monday evening from san francisco that first class
what are all the flights on delta in and out of fort worth
okay what i'd like to do on this one is go from washington to atlanta i want a nonstop and i'd like to leave around 5 pm
list all flights from boston to san francisco with at least 3 stops
what are the flights from atlanta to baltimore
list the flights from denver to san francisco after 2 pm on a monday
does delta aircraft fly dc10
what flights are there from new york city to las vegas
does united have a flight from miami to washington dc on wednesday
show me all flights on thursday from atlanta to oakland which arrive in oakland before 5 o'clock pm and serve a meal
do you have an afternoon flight leaving in the afternoon going from boston to san francisco with a stopover in dallas
list nonstop flights from los angeles to pittsburgh which arrive on monday after 5 pm
what type of aircraft does eastern fly from atlanta to denver before 6 pm
list flights from phoenix to detroit on thursday june twenty fourth
do any us air flights leave from san francisco
what are the coach fares for flights from charlotte to newark tuesday afternoon
i would like to find out what flights there are on friday june eleventh from st. petersburg to milwaukee and then from milwaukee to tacoma thank you
is there a direct flight from atlanta to philadelphia that arrives in philadelphia around 12 noon
i would like to see all flights from denver to philadelphia
what is the arrival time in san francisco for the 755 am flight leaving washington
how much does it cost to fly from atlanta to san francisco
i want a flight from long beach to st. louis that stops in dallas
okay that one's great too now we're going to go on april twenty second dallas to washington the latest nighttime departure one way
is there an afternoon flight from charlotte to minneapolis around 2 pm
show me all flights from charlotte to columbus
what are the round trip flights from philadelphia to san francisco
i would like to know what type of aircraft will be used on the morning of july seventh from atlanta to boston
american flights from cincinnati to salt lake city
please show me flights from denver to san francisco on wednesday after 1300 hours
flight from cleveland to nashville
what is the cheapest fare between boston and san francisco
show me all daily flights from milwaukee to orlando
show me fares from baltimore to philadelphia
list nonstop flights from burbank to denver arriving by 6 pm
could you tell me what morning flights are available from oakland to denver before 10 am
list flights from cincinnati to san jose friday evening
what flights are there on saturdays from philadelphia to denver
i would like to fly on american airlines from baltimore to san francisco
please show me airlines with flights from denver to boston with a stopover in philadelphia
what are the air restrictions on flights from pittsburgh to atlanta for the airfare of 416 dollars
what ground transport is available in minneapolis
i'd like a ticket on a plane from denver to atlanta i would like a coach class or lowest fare ticket
what are your flights from pittsburgh to baltimore
what flights go from philadelphia to dallas with a stopover in atlanta
show me the flights from boston to oakland
delta flights to san francisco please
please give me the flight times i would like to fly from boston to baltimore in the morning before 8
what is the earliest flight that goes from atlanta to washington on thursday
what are the lowest one way fares from atlanta to denver
what kind of aircraft do you have flying from boston to san francisco on august twenty seventh
what flights are there from nashville to houston tomorrow evening that serve dinner
on may four atlanta to denver delta flight 257
list all flights going from boston to atlanta before 5 o'clock am on thursday
what is the cheapest fare that i can get between philadelphia and san francisco
what is the schedule of ground transportation from the airport in philadelphia into downtown
what afternoon flights are available from atlanta to san francisco
what is the minimum connection time for houston intercontinental
show me flights to san francisco from philadelphia stopping in dallas
i would like to book a flight on us air first class from cleveland to miami on february twenty fourth
i need to spend much of a day on the ground in atlanta find me an early flight from boston and the lastest possible flight back from atlanta
show me the cheapest one way flights from pittsburgh to dallas leaving pittsburgh between noon and 2 pm
from phoenix to las vegas on saturday
i need to take ten people from denver to phoenix please give me the flights during the week
could i have the flights from newark to orlando please
i need a flight from long beach to st. louis stopping in dallas the flight should also serve lunch
how much does it cost to fly on american from dallas to baltimore
what are the morning flights from philadelphia to dallas going on american airlines
i need fare information from denver to pittsburgh
show me all flights between san francisco and philadelphia for september fifteenth
what is the ground transportation available in fort worth texas
what flights are there between washington dc and san francisco after 6 pm on wednesday
are there any flights from boston to san francisco with a stopover in dallas
what is the distance from toronto international airport to toronto
yes i would like to find what flights are available from atlanta to boston on the morning of july seventh
i would like an american flight from toronto to san diego with a stopover in denver please
list all the flights that arrive at general mitchell international from various cities
list all the takeoffs and landings at general mitchell international
how many first class flights does delta have today
show me all the flights from denver and all the flights from miami that arrive at baltimore around noon
does united airlines provide any first class flights from denver to baltimore
i would like to find a flight that goes from boston to orlando i would like it to have a stop in new york and i would like a flight that serves breakfast
is there a flight on eastern airlines from boston to denver
i need to fly from nashville to tacoma first thing in the morning what is there
the flight will originate from boston
describe fare code qx
what flights go from seattle to boston via minneapolis
what's the ground transportation like at pittsburgh
could you please give me information concerning american airlines a flight from washington dc to philadelphia the earliest one in the morning as possible
i want to fly from philadelphia to dallas and make a stopover in atlanta
please show me round trip tickets from denver to oakland
what are the afternoon flights from atlanta to baltimore
i'd like information on the least expensive airfare round trip from pittsburgh to boston
what is the least expensive way to fly from philadelphia to san francisco
what is ewr
show me ground transportation in washington dc
show me airline abbreviations
all the flights from baltimore to san francisco
what flights arrive in seattle from on continental
in flight meal oakland to philadelphia saturday
show all tuesday morning flights from pittsburgh to denver
please give me all the flights from long beach california to memphis tennessee
phoenix to newark wednesday
could you tell me what the earliest flight that goes between atlanta and denver is which serves a meal
how much does a first class ticket cost from boston to san francisco round trip
thank you for that information now i would like to book a flight from philadelphia to boston on the night of april sixteen around 9 o'clock
show me all the flights that arrive in baltimore in the evening
afternoon flights from boston to san francisco please that leave in the afternoon
show me the first flight that arrives in toronto from cincinnati
what is sa
flights from boston to pittsburgh
show me the flights from love field to all other airports
ground transportation for st. paul
i need to fly from denver to san francisco tuesday
what are the flights and fares from boston to philadelphia
i'm requesting flight information on a flight from denver to san francisco on wednesday
what flights are there from cleveland to miami on us air that arrive in miami before 4 pm
describe ground transportation in dallas
i would like the first flight from dallas into houston on march first and the last flight from houston back to dallas on march first
can you help me with ground transportation information i need to get from the airport in philadelphia to downtown philadelphia
i'd like to have some information on a ticket from denver to atlanta with a stop in pittsburgh
i'd like to see the flights from baltimore to philadelphia
show me all flights from dallas to pittsburgh on monday which leave after 8 o'clock pm
what are the flights from atlanta to baltimore which arrive in baltimore at 7 o'clock pm
flights from cincinnati to dallas departing after 718 am
from new york to toronto on thursday morning
what's the lowest round trip fare from dallas to any city
i would like to book a flight from denver to pittsburgh on july fifteenth i'd like it to be the cheapest flight
i want a cheap from denver to atlanta
coach class flights on twa from columbus to st. paul
nonstop flights seattle to boston
what are the round trip fares for flights from denver to philadelphia arriving after 1700 on continental
what is ua
yes on the delta flight leaving san francisco at 225 pm arriving philadelphia 1158 pm what type of equipment is used on that flight
all flights from denver to philadelphia
which airlines fly from bwi to dallas fort worth
flights from los angeles to pittsburgh
are there any flights from dallas fort worth to boston leaving before 10 am
what is the earliest flight leaving boston and arriving in atlanta on november seventh
what is the least expensive airfare between boston and baltimore
i need to know information for flights leaving dallas on tuesday evening and returning to atlanta
all flights and fares from pittsburgh to dallas round trip after 12 pm less than 1100 dollars
okay let's see do you have a flight on delta airline from atlanta to boston
show me all flights from oakland to philadelphia on saturday which serve a meal and arrive in philadelphia before noon
what flights do you have leaving denver and arriving in san francisco
show me the flights from chicago to indianapolis
i need a flight from kansas city to newark on the first of july
show me the least expensive flight from miami to new york on a sunday with first class fare
looking for flights in toronto to san diego
what is the earliest flight from denver to san francisco on the morning of august twenty seventh
show me the flights from san diego to newark new jersey
nonstop flights denver to kansas city
i would like an american airlines flight from cincinnati to burbank leaving this afternoon
list all flights going from boston to atlanta on wednesday after 6 o'clock pm on wednesday
show me next wednesday's flights between phoenix and milwaukee
what classes of service does twa have
what kind of airplane goes from boston to san francisco before noon
all fares and flights from philadelphia
does midwest express serve baltimore
i would like to fly from baltimore to san francisco on eastern airlines
how many daily us air flights are there between philadelphia and pittsburgh
i'd like a flight from san diego to toronto on alaska airlines leaving around 1 pm
i need a flight from philadelphia to boston
how far is downtown from the airport in dallas
list the fares of the delta airlines flights from boston to philadelphia
list all nonstop flights from newark to tampa leaving on friday
please give me round trip fares from pittsburgh to philadelphia
is there a late afternoon flight leaving washington for denver
i want a flight from montreal quebec to san diego california that leaves sunday
a first class flight on american to san francisco on tuesday in the next week
what is the first class fare from boston to dallas
i would like to see all flights from baltimore to philadelphia
show me fares from baltimore to philadelphia
flight information on january twenty third 1992 from denver to san francisco
what is the earliest departure time from boston to denver
flights from boston to pittsburgh
information of a flight from atlanta to pittsburgh
show me flights from atlanta to washington
round trip flights from minneapolis to san diego coach economy fare
show me the flights out of love field
what is the latest flight from philadelphia to boston
what are the flights from st. louis to burbank sunday evening
show me the flight from detroit to westchester county with the highest one way fare
i'd like to make a round trip from la to newark by way of charlotte
show me the flights from westchester county to cincinnati
show me the cheapest flight on june fourteenth arriving in baltimore starting from dallas
what is the last flight from washington to boston
show me all flights from atlanta to san francisco which leave the day after tomorrow after 5 o'clock pm
find the earliest breakfast flight from boston to oakland
show me all flights between boston and washington
what flights from san jose to dallas on friday afternoon
how much will it cost taking coach from orlando to indianapolis on december twenty ninth flying us air 311
what flights are available on wednesday from atlanta to washington dc
on tuesday the twenty third flights from philadelphia to san francisco on american airlines
find travel arrangements for a round trip flight from dallas to pittsburgh after 8 pm
what kind of aircraft is used on the first class american airlines flight from philadelphia to san francisco stopping in dallas
fly from dallas to baltimore
on august thirtieth i would like a flight from denver to san francisco in the early am
what are the flights from milwaukee to tampa
i'll need a rental car at the atlanta airport can you show me what's available
list daily flights from oakland to boston using united airlines
what is hp
could you please find me the earliest flight from boston to oakland
show me the flights from san francisco to newark that leave after 11 pm
i need a flight delta airlines kansas city to salt lake
what flights depart from charlotte to newark that leave in the afternoon or leave in the evening
i'd like to fly from boston to san francisco
what flights from boston arrive in dallas fort worth before 5 pm
list all flights leaving denver arriving in seattle on saturday that depart after 1230 pm
all flights from miami to new york
tell me distance from orlando airport to the city
is there any ground transportation to the city in dallas
what are the flights from denver to baltimore on united airlines
what flights are there on wednesday evening or thursday morning from denver to sfo
which united airlines flights go through denver
would you be able to put me on a flight with delta leaving the morning of august twenty seventh from baltimore to san francisco
what is fare code h
can i get from dallas to san francisco leaving in the morning and arriving in the morning
give me the flights from indianapolis to orlando on december twenty seventh and twenty eighth
no i want to go from denver to oakland
show flights from pittsburgh into san francisco
show me flights from milwaukee to orlando on wednesday evening or thursday mornings
show me the first class fares from boston to denver
find travel arrangements for a one way flight from boston to pittsburgh
i want a flight from toronto to san diego that stops in st. louis are there flights
show me the dinner flights from baltimore to oakland
what flights are there from memphis to las vegas
i'm interested in flying from boston to atlanta
please list any flights from oakland california to philadelphia on tuesday
show me flights between memphis and las vegas on sunday
are there any other flights from boston to pittsburgh wednesday next week later than 5 pm
between boston and denver i'd like a flight that takes the least amount of stops to get to boston
list flights from pittsburgh to baltimore
explain restriction ap please
what's the ground transportation from oakland to san francisco
what flights from miami to indianapolis
show all flights on lufthansa airlines out of boston
list all the flights from atlanta to charlotte north carolina that leave next monday
i'd like a flight from las vegas to detroit on monday
show me the cheapest fare from dallas to baltimore
show me all flights from phoenix to milwaukee next wednesday
what ground transportation is available in dallas
i need information on a flight from washington to fort worth
ground transport in oakland
is there ground transportation between airport and downtown in boston
can i go from boston to san francisco with a stopover in denver
show me all flights arriving at dallas
what are all of the flights into and out of atlanta's airport
what is the first flight from atlanta to boston leaving on thursday september fifth
i'd like information on continental airlines flights from washington to philadelphia
show me all flights between san francisco and philadelphia on september fifteenth with departure time after 12 pm
what is the earliest flight from boston to san francisco on american airlines
show me all the us air flights to pittsburgh between 12 and 4 in the afternoon
what are the flights from pittsburgh to denver and back
show me all flights from pittsburgh to atlanta
what flights leave atlanta at about 3 in the afternoon and arrive in san francisco
what type of ground transportation is available in washington
what flight do you have from pittsburgh to san francisco on the morning of august twenty seventh
fares and flights from denver to philadelphia
i'd like united airlines flights from denver to baltimore
what are all the flights from boston to dallas
give me the flights from new york city to las vegas on sunday and the flights from memphis to las vegas on sunday
what flights leave san francisco after 8 pm and go to dallas fort worth
show me round trips from houston to las vegas nonstop
what is the latest return flight from atlanta to boston
give me the lowest fare from atlanta to denver on may seventh please
what does the fare code qw mean
flights that go from oakland to philadelphia on friday
what are the dinner flights from indianapolis to san diego on wednesday may twelfth
i'd like to find the cheapest flight from washington dc to atlanta
i would like a flight from boston to san francisco on august seventeenth
please show all flights from philadelphia to denver airport next sunday
show me flights from pittsburgh to san francisco on friday leaving after 12 noon
american flights to houston from cincinnati
what is the cheapest one way fare from atlanta to boston
what is the least expensive one way fare from boston to san francisco
philadelphia to boston monday
please list the twa flights from las vegas to new york and fare
show me flights from dallas to baltimore
now i want to see return flights from miami to new york
flight from denver to dallas fort worth
on july twenty third an early flight on american from philadelphia to san francisco
show me all the flights from toronto on nationair
display all flights from denver to san francisco on august seven
show me the united flights which go from boston to washington dc
i would like a flight as early as possible in the day leaving from boston and to denver
list all flights on saturday from dallas to san francisco nonstop
what is your last trip on august twenty seventh from washington to boston
show me the flights from baltimore to oakland please
which united airlines flight flies from boston to san francisco and makes a stopover in philadelphia
list all daily flights between boston and oakland using american airlines
what flights leave pittsburgh for denver on monday night
list all flights from boston to san francisco with the maximum number of stops
does eastern airlines fly between boston and washington
what delta flights are available from pittsburgh to san francisco
find a flight between denver and oakland the flight should be in the afternoon and arrive close to 5 pm the flight should be nonstop
can you tell me about ground transportation between the dallas airport and downtown dallas
on july eighth i'd like a flight from newark to orlando in the morning
show first flight from pittsburgh to atlanta on wednesday
what is yyz
what are the flights from san jose to nashville on thursday the twentieth
what is the distance from los angeles international airport to los angeles
show me all flights from san diego to los angeles
list all flights leaving san francisco monday afternoon arriving in pittsburgh
show me the delta flights from san francisco to boston
show me all flights from san francisco to boston philadelphia or baltimore
what are the afternoon flights for denver to san francisco
i would like a morning flight from milwaukee to denver colorado please
show me all flights from atlanta to denver which leave after 5 o'clock pm the day after tomorrow
give me the continental flights from seattle
what flights do you have between oakland and boston with a stopover in dallas fort worth
i'm traveling from boston to atlanta and i'd like to go sometime after 5 pm but i want to know what kind of airplane it's on
how many united flights are there to san francisco
july seventh what is the cost of a round trip ticket traveling first class on united airlines leaving from denver going to baltimore
what ground transportation is available in san francisco
what northwest airline flights leave denver before noon
show me any show me what the first class fares are of the flights from pittsburgh to san francisco on monday
flights from columbus to milwaukee
what is the latest flight on wednesday going from atlanta to washington dc
show flights from pittsburgh to oakland on us airlines with fare information
all flights from pittsburgh to philadelphia
i need to fly from boston to denver and then to san francisco and back to boston
what does ewr mean
what's the cheapest flight from dallas to baltimore on december seventeenth
what does it cost to fly from boston to oakland on united airlines
i want information on flights from atlanta to washington dc i want to leave wednesday after 4 pm or thursday before 9 am
i would like to fly from boston to baltimore
tell me about ground transportation in st. petersburg airport
what are all flights from denver to philadelphia on saturday
list the flights from toronto to salt lake city
what are the latest flights that i can take from baltimore to boston
what flights are between dfw and oakland
i need a listing of flights from st. petersburg florida to tacoma washington leaving tomorrow and i would like to have a stopover in milwaukee please
what flights from atlanta to washington
show fares and flights from denver to oakland
show me the cheapest flights from san francisco to philadelphia
show all flights from pittsburgh to san francisco
show me round trip tickets from new york to miami
show me the flights from boston to san francisco that stop in dallas
from las vegas to phoenix
show me the flights from boston to oakland
i need late flight wednesday from oakland to salt lake city
i need information from denver to pittsburgh
please list all flights between indianapolis and orlando on the twenty seventh of december
okay i'd like a nonstop flight from houston to memphis that arrives in memphis in the early afternoon on tuesday june first
i'd like a flight from boston to san francisco leaving in the afternoon any time please
show me the round trip tickets from baltimore to atlanta
show me all flights from philadelphia to denver on sunday which leave philadelphia after noon
flights between milwaukee and orlando one way
show me the one way flights from detroit to westchester county
find travel arrangements for a round trip flight from dallas to pittsburgh arriving after 8 pm before 10 pm
i want to go from boston to oakland on united and leave at 838 am which flight should i take
list all united flights from boston to san francisco with fare code qx
what is restriction ap 80
what are the flights from nashville to tacoma on tuesday the eighteenth of may
what type of ground transportation is available at logan airport
what flights from indianapolis to memphis
which flights are there on tuesday from san francisco to pittsburgh
show me flights from washington to boston on friday
what is airline dl
what are the fares for flights between atlanta and dfw provided by american airlines
show me the ground transportation in the salt lake city airport
do all the flights to oakland land at the same place
i'm interested in the cheapest fare from washington to fort worth
please show me flights which cost less than or equal to 466 dollars from new york to miami leaving on a tuesday
now i need a flight leaving fort worth and arriving in denver no later than 2 pm next monday
all flights from boston to washington dc on the tenth of november
ground transportation philadelphia
i want the flights from toronto to san diego that stop in st. louis
hi i need to go from cincinnati to san jose california after 6 pm on saturday
show me the flights from love field
show me flights from pittsburgh to philadelphia
while i'm in pittsburgh what ground transportation is available
show me the flights from denver to philadelphia and the flights from pittsburgh to philadelphia
what airplane types fly from pittsburgh to baltimore
list the flights from dallas to san francisco on american airlines
train to newark
what flights go to san francisco from boston
show me all flights from philadelphia to dallas which arrive in dallas before 3 o'clock pm on saturday
list evening flights tomorrow from phoenix to detroit
what is the earliest flight going from san francisco to dallas on monday august nineteenth
i would like to originate my flight in washington dc stop in denver with the destination city of san francisco
what's the fare for delta flight 217 from dallas to san francisco
what are the times that you have planes leaving from san francisco going to pittsburgh on july seventh
flights between new york and san jose
show me all flights from new york to miami on a tuesday with round trip fare less than 932 dollars
what does fare code qo mean
what are the flights available in the morning between boston and denver
what is the latest flight from washington dc to denver
what does ground transportation look like in oakland
i would like a flight from baltimore to san francisco on twa with a stop in denver
flight from denver to boston
show me all nationair flights from toronto
what is the abbreviation for canadian airlines international
list the flights from houston to st. paul
how much does it cost to fly from boston to atlanta
what airline is dl
i'd like a flight on united airlines from dallas to san francisco that leaves after 815 am
what are the flight numbers of the flights which go from san francisco to washington via indianapolis
looking for a flight from cleveland to dallas
630 am flight on august twenty seventh from atlanta to dallas
flights between tampa and st. louis
show me ground transportation in westchester county
is there ground transportation from atlanta airport to downtown atlanta
show me all the flights out of boston today
what type of aircraft leaves from boston to washington dc before 9 am
i'd like to see flights from pittsburgh to atlanta
i'd like a flight from st. petersburg to miami on that next thursday
give me the earliest flight tomorrow on northwest airlines from st. petersburg to milwaukee
what flights from atlanta to st. louis on tuesday arriving around 230 pm
what flights from detroit to st. petersburg
i need a flight from los angeles to pittsburgh on monday afternoon
is there an early morning delta airlines flight between boston and washington
what airlines fly from toronto to san diego with a stopover in denver
i need a flight from cincinnati to san jose leaving after 6 in the evening
show me the one way flight from detroit to westchester county with the highest fare
is there a flight between oakland and boston with a stopover in dallas fort worth on twa
what kind of ground transportation is there in philadelphia
give me flights from pittsburgh to baltimore
i'd like to fly from boston to baltimore
list all the flights that takeoff from general mitchell international
what is the first flight from atlanta to boston on thursday september fifth that leaves after 8 am
hello i would like to plan a flight from boston to denver
give me all the flights from miami to chicago on american airlines
atlanta ground transportation
show me the cheapest one way fares from san diego to miami
flights from baltimore to washington dc
what is the earliest flight that has no stops from washington to san francisco on friday
list all flights leaving denver on continental on sunday after 2134
i would like to fly from denver to pittsburgh and atlanta
what is the least expensive flight from pittsburgh to atlanta leaving on october fifth
please show me flights from philadelphia to baltimore between 10 am and 2 pm
how much does flight ua 297 from denver to san francisco cost
show all flights from denver to san francisco
on november twenty third what flights go from atlanta to denver on delta airlines
what ground transportation is available in dallas tomorrow
am flights from atlanta to philadelphia
what does the fare code y mean
what american airlines flights depart milwaukee for phoenix on saturday or sunday
which flights depart burbank after noon and arrive in denver by 6 pm
show me the flights before 11 am on august second from boston to denver on delta
give me flights from san francisco to boston on thursday afternoon
what is the cost of limousine service at logan airport
information on round trip flights from pittsburgh to san francisco first class
explain the restriction ap 57
i would like a flight leaving from boston arriving in san francisco with a stopover in atlanta
what is airline ff
is there ground transportation from the airport to downtown phoenix
does flight dl 323 dl 229 from boston to denver stop in philadelphia
i'd like to fly from tampa to montreal
show me us air fares for next sunday from miami to cleveland
show me the flights from san francisco to dallas
i would like the flight from atlanta to denver that has the cheapest one way fare
is there a flight from charlotte to newark on tuesday evening
how many people fly on a turboprop
i need a return flight from chicago to kansas city leaving chicago around 7 in the evening next thursday
what economy flights are available from dallas to baltimore on december seventeenth
what does the fare code f and fn mean
how do i get to philadelphia downtown from the airport
could you find me a flight from boston to san francisco that stops in denver
what ground transportation is there in denver
fare code y what does that mean
which flight is a one way fare at 329 dollars from denver to pittsburgh
i am also interested in a flight that runs from st. louis to las vegas
show me the evening flights from philadelphia to baltimore
what kind of aircraft is used on a flight from cleveland to dallas
i need a nonstop flight from atlanta to baltimore arriving between 5 pm and 730 pm
what does fare code y mean
what flights go from boston to atlanta next tuesday
show flights from pittsburgh into san francisco
i would like to book a flight for august twenty seventh from baltimore to san francisco on us air
what airport in new york is closest to downtown
i want a flight that leaves thursday around 7 pm from chicago to kansas city
what flights are available monday from san francisco to pittsburgh
show me the round trip tickets from baltimore to dallas
show me the flights from baltimore to pittsburgh
what flights are there from newark to seattle on saturday
i'd like the lowest fare from denver to pittsburgh
i want to go from denver to oakland
i want to fly from milwaukee to orlando
give me the latest flight tomorrow on american airlines from milwaukee to tacoma
show me morning flights from atlanta to philadelphia
what is the price of business class from boston to san francisco on twa
first i'd like to fly from philadelphia to dallas and fly from dallas to san francisco
show me the cheapest flight arriving in baltimore on june fourteenth starting from dallas
what would be cost of a round trip from pittsburgh to san francisco
philadelphia to san francisco monday
what flights go from chicago to seattle on continental airlines on saturday
show me the cheapest one way tickets from atlanta to dallas
show me all flights from oakland to philadelphia on saturday which serve a meal
show me the flights from dulles to san francisco leaving after 6 pm
can you tell me which flights go from memphis to tacoma and make a stop in los angeles
i need a flight on air canada from toronto to san diego with a layover in dc
how many people fit on a 73s
show me the flights into love field
what flights are available from boston to denver today
please list the american airlines flights from houston to milwaukee
list the number of flights leaving boston for dallas fort worth before 9 am in the morning
show me the flights from atlanta to baltimore
does continental fly from boston to san francisco
what flights are there from newark to tampa
how many first class flights does united have leaving from all cities today
what are all flights from boston to pittsburgh on wednesdays
show me a list of ground transportation at denver
show me the evening flights from atlanta to boston
show me the flights from denver to philadelphia again
what flights can i take between boston and atlanta so that when i leave boston i will have the maximum amount of time on the ground in atlanta and still return in the same day
how can i get from indianapolis to montreal in the evening
what's the capacity of an f28
show me all flights from denver to pittsburgh which serve dinner
which flights leaving baltimore to dallas on monday afternoon have economic class
i'd like to fly early tomorrow from columbus to minneapolis
is there a 4 o'clock flight from washington dc to denver
information on first class round trip from pittsburgh to san francisco
when is the earliest flight from boston to denver
san francisco to denver tuesday
i need your help with information on ground transportation from the airport in philadelphia to downtown
show me all flights from montreal
information on american airlines from fort worth texas to philadelphia
what is the meaning of fare code qx and qw
flights on sunday from tampa to charlotte
show me dallas to boston flights
show me all twa flights please
hello i would like to plan a flight on american airlines from boston to denver
can i take a single airline from la to charlotte to newark back to la
all flights from boston to washington dc
how much does it cost to get downtown from the atlanta airport by limousine
i'd like to fly united airlines from washington to denver
what are the flights from denver to san francisco on tuesday october fifteenth
list flights from detroit to san diego on thursday
list all flights from chicago to seattle on continental airlines which depart on saturday before noon and include a meal
list all flights from pittsburgh to philadelphia
what flights from st. paul to kansas city on friday with supper served
are there any thrift economy flights to san francisco from boston
what flights are available from atlanta to washington dc on wednesday
show me the flights to love field
show me the ground transportation at denver
airports
give me the continental flights from chicago to seattle on friday
explain restriction ap 57
show me flights from atlanta to philadelphia in the morning
does eastern airlines fly early in the morning between logan and bwi
show me all flights from milwaukee to orlando
i would like a flight leaving from washington to boston at 110 pm on august twentieth
display all flights from baltimore to boston on july twenty ninth
show me all flights from boston to denver which arrive before noon on wednesday
hi i'm calling from boston i'd like to make a flight to either orlando or los angeles
show me flights from denver to philadelphia
what time does the flight leave denver going to san francisco on continental airlines
all flights from washington dc to san francisco after 5 pm on november twelfth economy class
show me the flights from boston to pittsburgh on wednesday and thursday
i would like a nonstop flight from new york to las vegas on march second
display types of aircraft departing from cleveland to dallas before noon
show me the flights from baltimore to dallas
list all flights leaving denver on continental on sunday
first class american flight from philadelphia to dallas on wednesday
from washington dc to philadelphia departing in the afternoon
what is the meaning of meal code s
list all flights departing from general mitchell
i would like to know the flights that are available leaving out of pittsburgh to san francisco on thursday night after 9 pm
please give ground transportation at denver airport
please list the flights for me that leave dallas on tuesday morning and arrive in atlanta
what flights does american airlines have from boston to dallas
what flights go from boston to pittsburgh after 1205 in the afternoon
what flights depart from pittsburgh and arrive in oakland california
i'd like to leave atlanta in the afternoon and arrive in philadelphia at 5 pm
what's the earliest flight leaving denver for pittsburgh
please list the flight times from boston to pittsburgh
flights from atlanta to washington dc
what is restriction ap 55
i am interested in a flight from cincinnati to burbank the flight should be american and leave in the afternoon i need to know the aircraft and flight number
show me all flights from philadelphia to san francisco with one stop in dallas
what is the cheapest flight from san francisco to pittsburgh on sunday
i need a united airlines flight from denver to baltimore on saturday
list all flights from baltimore to atlanta after noon thursday nonstop
i want a flight from boston to atlanta
what type of ground transportation is available between the airport and downtown san francisco
on monday i'd like to travel from las vegas to detroit michigan
show me the flights from boston to san francisco
show me all the flights leaving baltimore
do you have an early morning direct flight from philadelphia to pittsburgh
i want to see the cheapest flight from denver to pittsburgh
show me the car rentals in baltimore
i'm flying from boston to dallas
show me the earliest flight from cleveland to memphis
what is the ground transportation from philadelphia airport to the city proper
i'm looking for a flight leaving denver traveling to atlanta and stopping at pittsburgh is this possible
what is the first flight after 8 am from boston to san francisco
are there any flights from pittsburgh to boston that leave between noon and 5 o'clock
show me the last flight on wednesday from atlanta to denver
show me the ground transportation to westchester county
find travel arrangements for a round trip flight from dallas to pittsburgh arriving after 8 pm
what is the earliest flight from boston to denver
what's the latest flight from san francisco to atlanta
what types of ground transportation are available in denver
do you have a 747 that flies from san francisco to baltimore
what is the type of aircraft for united flight 21
show me flights from minneapolis to seattle on july second
show me all the flights from san francisco to boston for august thirty first 1991
what does code y stand for
what is the earliest flight leaving washington to san francisco
what flights from newark to los angeles on wednesday
give me the flights from new york to las vegas and memphis to las vegas on sunday
please list all northwest flights into denver
does midwest express serve baltimore
what are the fares for flights from la to newark leaving monday morning
dallas ground transportation
i would like a flight from philadelphia to dallas
please list information regarding san francisco airport
what times does the late afternoon flight leave from washington for denver
i'd like to know the price of first class seats from atlanta to san francisco
what is the price of american airlines flight 19 from new york to los angeles
please show me the return flights from miami to new york
looking for a flight from dc to denver colorado
flights from san francisco august one
i'd like a flight tomorrow from columbus to houston with a stopover in nashville
show me flights from boston to baltimore coach on wednesday about 12 noon
does american airlines fly from atlanta to philadelphia
what does fare code m mean
what is the last flight from baltimore to boston
list all flights that leave from baltimore or denver or pittsburgh and arrive in philadelphia
show me the flights from pittsburgh to philadelphia
what's the lowest round trip fare from atlanta to pittsburgh
what flights are there on delta from boston to dallas
show me the cheapest fare in the database
what kinds of planes are used by midway airlines
i would like a list of round trip flights between indianapolis and orlando florida for the twenty seventh and the twenty eighth of december
what is your last flight leaving san francisco and arriving in denver
i would like to fly from boston to atlanta
i'd like to make a trip between atlanta and boston i wish to know the cheapest fare
what flights are there from new york city to las vegas
what's the earliest flight from nashville to tacoma on american on tuesday the eighteenth of may
please list all flights from baltimore to atlanta
what is the most expensive flight from dallas to baltimore
what are the fares for flights between atlanta and dfw provided by delta airlines
find travel arrangements for a round trip flight from baltimore to pittsburgh
what about the flights from boston to la
i need a return flight from chicago to kansas city leaving chicago around 7 in the evening on the day following next wednesday
show me the cheapest round trips from dallas to baltimore
what airline besides continental flies between boston and denver
what are the flights from philadelphia to dallas on october first 1991
please list only united airlines flights between denver and boston
flights from atlanta to san francisco august second
show me the flights on delta or twa which go through atlanta
i want an early morning flight from boston to philadelphia
i would like a flight from philadelphia to san francisco but i would like to stop in dallas
what are the costs of flights from dallas to boston tomorrow
list all the airlines flying between washington and denver
show me the flights from indianapolis to montreal
show me the flights between boston and san francisco denver and san francisco boston and denver
flights from westchester county to san francisco daily
can you list the cheapest round trip fare from orlando to kansas city
list flights from pittsburgh to atlanta on the evening of august sixth
saturday flights from las vegas to montreal
please give me all flights from dallas to oakland before noon
us air next wednesday from cleveland to miami
may i see all nonstop flights from st. petersburg to charlotte
what kind of aircraft does delta use before 8 am on august second from boston to denver
what flights are available between boston and washington arriving in washington at 630
what nonstop flights between atlanta and washington leave atlanta after 6 o'clock pm
what flights go from san francisco to dallas
i need a flight from boston to san francisco via dallas fort worth
flights from ontario to orlando
i need a flight from philadelphia to dallas
what is fare code qw
list all american airlines flight from milwaukee to phoenix on sunday
i need to reverse the flight from pittsburgh to denver please
please give me the flights from boston to pittsburgh on thursday of next week
show me fares for flights from minneapolis to seattle on july first 1993
what northwest airline flights leave denver before noon
give me flights from atlanta to baltimore
how much does flight dl 402 from denver to philadelphia cost
i want a flight from milwaukee to orlando one way leaving after 5 pm on wednesday
show me the flights from boston to pittsburgh on thursday
show me the last flight from denver to boston
is there a united airlines flight from miami to washington dc arriving around noon
nonstop flights denver to boston
show me the flights from dallas to baltimore at economy level
how long does it take to get from kansas city to st. paul
i need a flight from indianapolis to toronto reaching toronto on thursday morning
does midwest express serve philadelphia
i want a flight departing from newark to los angeles that leaves in the morning
us 771 pittsburgh to philadelphia what is the fare
pittsburgh to denver
what airlines fly between boston and san francisco
show me flights from boston to denver early am on tuesday
i'd like to fly from boston to san francisco could you find me the cheapest fare
does american airlines have a flight from pittsburgh to atlanta
list all flights from atlanta to baltimore thursday morning
is the american flight 813 from boston to oakland a flight that goes straight through from boston to oakland without stopping at another city
what is the earliest flight that i can take from boston to baltimore
please explain fare code f
i'm sorry i want to book a flight from atlanta to denver colorado
show me the direct flights from san francisco to boston
i want wednesday flights from atlanta to washington dc
list the total number of flights between all airports by delta
list the flights from pittsburgh to san francisco on thursday
what delta flights are available to fly from philadelphia to boston
what is fare code q
all flights phoenix to sfo
please give me fares from denver to philadelphia
show me all connecting flights on united airlines between boston and san francisco
get me a first class flight on american to san francisco on tuesday next week
show me us air flights from san francisco to pittsburgh on tuesday
i need information flight information for tuesday on a flight leaving baltimore bound for dallas
what flights leave pittsburgh and arrive in los angeles after 5 pm on thursday
what flights are there from minneapolis to newark on continental
i want to fly philadelphia to dallas on july eighth
do you have any flights from denver to baltimore via dallas
is there a round trip flight from atlanta to dallas via denver
list american airlines flights from newark to nashville
what are the flights from boston to san francisco
what flights from atlanta to toronto
where is general mitchell international located
what flights are there tuesday morning from dallas to atlanta
show me flights from pittsburgh to los angeles thursday evening
i want wednesday flights from atlanta to washington dc
flights from washington dc to denver
what is the available ground transportation between san francisco and downtown
give me a flight from memphis to las vegas and new york city to las vegas on sunday that arrive at the same time
show me first class flights one way tampa to st. louis
show me all the flights from burbank to denver
i need to fly leaving philadelphia to atlanta
what flights go from pittsburgh to newark after 305 in the afternoon
i would like information on ground transportation in atlanta from the airport to the city in the morning around 9 am
find a flight from philadelphia to san francisco please on delta
list all the flights from atlanta to philadelphia on august the first
all round trip flights between new york and miami business class fare
what airlines go from atlanta to baltimore
i want to see the cheapest flight from atlanta to baltimore
what is the cheapest fare for flights from boston to dallas
repeating leaving denver to san francisco before 10 am what type of aircraft is used
i need to make a trip starting in boston going to dallas denver oakland and back to boston
what is the earliest morning flight from san francisco to boston
now show me the flights from denver to atlanta
give me the flights from memphis tennessee to charlotte north carolina
what is your earliest morning flight from indianapolis to charlotte
i need flight information between atlanta and boston
show me flights from boston to philadelphia on a monday
i need a flight from san diego california to indianapolis indiana leaving in the afternoon on tuesday
list all american airlines flights from phoenix to milwaukee which arrive on wednesday after 4 pm
what airport is at tampa
show me the flights from atlanta to bwi
what kind of ground transportation is there in washington dc
show flights from pittsburgh to oakland connecting through denver
is there a flight from atlanta to san francisco which connects in dallas
where does canadian airlines international fly
show me the most expensive fare
what is the first flight from boston to atlanta and what is the last flight from atlanta to boston
flight from dc to salt lake city
what are the flights from boston to philadelphia
show me the flights from san diego to newark
show me the fares from washington to oakland
what is the least expensive one way fare between philadelphia and boston
what continental flights go from chicago to seattle before 10 am in the morning that have a meal
i want a flight between oakland and boston that arrives before 5 pm
could you tell me if delta flight 296 serves breakfast
i would like to see the flights from denver to philadelphia
please show me all fares for flights from denver to oakland
list all flights on continental leaving denver
what flights go from boston to denver before 10 am
i would like a flight from toronto to san diego that stops in kansas city
i need a flight from toronto to san diego with a layover in washington dc on air canada
what is the fare going one way on november seventh from denver to oakland
which airlines have nonstop flights from kansas city to chicago
what is the cheapest fare between atlanta and san francisco
what ground transportation is available in boston
information on american airlines from washington to fort worth
what is the cost of a business class ticket going from boston to dallas leaving july first
what is the last flight leaving san francisco going to washington on friday
show me all the flights from cincinnati to toronto
what are the flights from dallas to philadelphia
how can i go from the san francisco airport to downtown san francisco
what are the fares for flights from charlotte to newark on tuesday and wednesday
show me the flights from washington to boston
show me flights from new york to miami on a tuesday with a round trip fare less than 466 dollars
show me your flights from atlanta to denver on june fourth
show all monday flights from san francisco to pittsburgh
list all flights on continental leaving denver on sunday after 2134
list flights between denver and pittsburgh
does delta have an early afternoon flight from boston to san francisco
show me the flights on tuesday morning from charlotte to baltimore
show me all the flights between oakland and denver
please list all flights from oakland to dallas on sunday morning
are there any flights before 12 noon on june fifteenth from long beach to columbus
what flights go from san francisco to boston and leave after 1 o'clock
please show me all round trip flights from new york to miami
what is the cost of a round trip flight from pittsburgh to atlanta beginning on april twenty fifth and returning on may sixth
show me the flights from philadelphia to dallas
what flights go from baltimore to newark wednesday morning
please repeat the flight departures for monday august nineteenth from denver to pittsburgh
i need a flight from baltimore to dallas tomorrow morning
what are the flights from cleveland to indianapolis for wednesday the twelfth
what flights does delta have between dallas and denver
show me flights from anywhere to philadelphia arriving after 2100
what flights are there from baltimore to san francisco
what are the flights from boston to san francisco
when does continental fly from philadelphia to denver on sundays
what flights from chicago to denver in the morning
on august thirtieth please schedule me on a flight from denver to san francisco early in the morning
show me the flights from boston to pittsburgh next wednesday night after 6 o'clock
where is general mitchell international located
i will be staying downtown in atlanta for two hours could you tell me what the ground transportation is available
how do you travel from san francisco airport to downtown san francisco
does delta airlines fly from boston to washington dc
what ground transportation is available from the pittsburgh airport to the town
please show me all the flights from denver to oakland that are nonstop
i want to fly nonstop from denver to dallas
show me which flights from san francisco to pittsburgh on a monday are first class
what is the earliest flight that eastern has between boston and washington
what is the earliest flight in the morning from boston to pittsburgh
show me ground transportation in denver during weekdays
can you list costs of denver rental cars
i'd like to fly from philadelphia to san francisco through dallas
list all flights from baltimore to philadelphia
what's the earliest flight from boston to philadelphia
sunday flights from new york city to las vegas
show me flights from miami to new york leaving on a sunday first class
what is fare code h
may i have a listing of flights from long beach to columbus ohio on tuesday
i'd like the cheapest one way fare from boston to san francisco
i'd like a list of the flights from oakland to dallas fort worth on sunday
tell me about flights from toronto to salt lake city leaving after 530 pm
let's see how much would a direct flight from atlanta to denver be on may seventh
what is the ground transportation available in denver
i need a cheap flight from baltimore to san francisco
on april fifteenth i would like an early morning flight from boston to atlanta
do you have a flight from atlanta to charlotte north carolina next monday
does us air have any flights out of atlanta to denver
what's the earliest flight from boston to bwi that serves lunch
give me all nonstops from new york city to las vegas that arrive on a sunday
morning flight from oakland to dallas
i live in denver and i'd like to make a trip to atlanta
find travel arrangements for a round trip flight from boston to pittsburgh
i need a flight from new york city to montreal tomorrow
show me fares from dallas to baltimore that cost less than 300 dollars
i want to know what flights you have available coach or economy class from baltimore to dallas
i want to leave from philadelphia and go to atlanta baltimore and boston please list these flights
i need a flight from boston to denver
show me the aircraft that canadian airlines uses
list the flights that arrive and depart from general mitchell international airport
i want a flight from ontario to chicago
how much is a round trip first class fare between boston and washington
show me the flights from san diego to newark
list all daily flights between boston and oakland using delta airlines
show me all flights from denver to burbank
what flights are available saturday to san francisco from dallas
flights from baltimore to philadelphia where the round trip fare is less than 1000 dollars
tuesday morning flights between charlotte and baltimore
show me the flights from atlanta to boston
please list all flights on northwest and united airlines that go to denver
i want to go between boston and san francisco
what flights from memphis to miami on wednesday
show me all the united flights from boston to denver
please show me airfare of flight us 345 from boston to pittsburgh
list the flights on sunday afternoon from oakland to dallas
in dallas fort worth i would like information on ground transportation
okay tell me what the earliest flight is that leaves between atlanta and denver
i want an early morning flight between philadelphia and pittsburgh on tuesday morning
list flights between boston and san francisco that serve breakfast
what flights does us air have from san francisco to pittsburgh on tuesday
what is the latest flight from boston to denver that serves a meal
give me the round trip coach fare from dallas to baltimore
pittsburgh to denver
what is the cost of flights from denver to san francisco
show me the flights from atlanta to washington dc on thursday evening
show me all flights from san francisco to washington dc area
how many flights does continental airlines have with a class of service code f
i want to fly from atlanta to philadelphia
flights from new york to miami
what flights are provided by delta airlines
list daily flights from denver to baltimore with first class service
show me all midwest express flights from detroit to chicago
show me the flights on friday from newark to tampa
list flights from boston to pittsburgh leaving early in the morning on august sixth
what are the coach class fares on flights from pittsburgh to atlanta
is breakfast served on flight ua 343 from boston to denver coach class
is there a flight leaving from boston to atlanta
yes i'm looking for a flight between oakland and boston with a stopover in dallas fort worth do you have one of those
show me the flights leaving from atlanta for washington dc on thursday morning
show me all flights from san francisco to la guardia nonstop
what's the cheapest flight from denver to pittsburgh
what are all monday flights from denver to san francisco on united airlines
which airlines fly between boston and philadelphia
display all the flights from baltimore to dallas which leave after 4 pm
what afternoon flights are available from denver to san francisco on wednesdays
do you have a flight from philadelphia to san francisco with a stopover in dallas
i'm starting from denver
find a flight from toronto to san diego with a layover in dc on delta airlines
list nonstop flights on sunday from new york to las vegas and list nonstop flights on sunday from memphis to las vegas
what is the earliest flight between pittsburgh and denver that serves breakfast
please list the cost of all flights from philadelphia to denver airport next sunday
a flight on continental airlines leaving boston and going to denver
show me all flights arriving to denver from baltimore oakland and boston
show me the cheapest fares from miami to new york leaving on a sunday
can you show me the cheapest round trip flights between denver and pittsburgh
what are the flights from boston to san francisco
show me the flights from denver to san francisco
display all flights from boston to baltimore on july thirty first
show me all flights from baltimore to philadelphia
i would like to find a flight that goes from la guardia airport to san jose i would like the flight to be on united airlines and arrive in san jose around 10 pm
i would like a flight from denver to pittsburgh
do you have a flight from charlotte to atlanta next tuesday
list flights from pittsburgh to san francisco
show me flights from seattle to san francisco that leave after 5 pm
i would like to book a flight for may twenty sixth going from tampa to milwaukee a direct flight if possible
list all flights leaving on thursday morning from new york city to montreal
find me the flights that are nonstop between boston and dallas that leave between 12 and 2 in the afternoon
what flights from las vegas to san diego
give me the flights from san francisco to washington dc for december first
show me the flights from dallas to san francisco
show me flights going from boston to denver arriving on wednesday morning
what is the ap 57 restriction
show me the flights from montreal to chicago
display all flights from dallas to boston on july thirtieth
what limousine service in toronto
all flights from long beach to phoenix
what's the schedule of flights from atlanta to boston on august first
please list nonstop flights from las vegas to new york on america west
ground transport denver
show me flights monday night after 8 pm for dallas to boston
i would like one flight from kansas city to st. paul arriving around dinnertime 6 pm
i want to fly boston to dallas
show me the us air flights from atlanta to boston
show me the aircraft that canadian airlines uses
show me flights from denver to atlanta
show me all flights from indianapolis to montreal
define airline us
i would like a flight from philadelphia to san francisco
what sort of ground transportation is there in washington dc
what flights are available between philadelphia and denver on september sixteenth
baltimore to philadelphia
show me flights which leave from boston on july twenty second arriving in pittsburgh
let's look at baltimore to philadelphia again
show me the flights from atlanta to washington dc on wednesday night and thursday morning
what flights do you have in the morning of september twentieth on united airlines from pittsburgh to san francisco and a stopover in denver
what is the fare from boston to oakland on united airlines
what flights are there from dallas to pittsburgh on monday morning
please list the flights from philadelphia to toronto
i want to travel from kansas city to chicago round trip leaving wednesday june sixteenth arriving in chicago at around 7 o'clock in the evening and returning the next day arriving in kansas city at around 7 o'clock in the evening which airlines fly that route
how much is a first class ticket from boston to san francisco
morning flight from boston to philadelphia
i would like a flight from washington to boston leaving at 230 on august twentieth
what flights are there from atlanta to oakland on thursday
show me the available flights from san francisco to boston on november twenty fourth
flights from newark new jersey to cleveland ohio
what is the earliest flight from boston to oakland that serves a meal
show me all canadian airlines flights from toronto
give me the cheapest flight from charlotte to long beach
okay for now i would like information on a flight on april twenty seventh from pittsburgh to atlanta leaving early in the morning about 8 o'clock
i would like to book a flight from chicago to seattle on june fourth
show me all the flights from milwaukee to orlando that leave after noon on wednesday and before noon on thursday
are there any flights between pittsburgh and baltimore using a j31 aircraft
all flights from denver colorado to pittsburgh pennsylvania
show me fares leaving on tuesdays from denver to go to dallas
what is the last flight from dallas to boston in the evening
what is the earliest nonstop flight from washington to san francisco
please list the friday flights from houston to milwaukee on american airlines in the evening
show me flights denver to washington on wednesday
what is the latest afternoon flight i can get from dallas to san francisco on first class
show me the lowest fare for a round trip flight from baltimore to dallas
does midwest express have any flights from montreal to detroit
show me all flights from denver or philadelphia or pittsburgh to baltimore
what is the lowest fare from denver to pittsburgh
what airlines fly from toronto to san diego
what is the cheapest flight from denver to pittsburgh
show me the price of flight ea 212 from atlanta to washington
what is the cheapest one way flight from atlanta to boston
what times on wednesday could i take a plane from denver to oakland
show me the flights that go from san diego to newark by way of houston
what are the flights from boston to baltimore leaving tomorrow
what is hp
i need a flight from atlanta to charlotte north carolina next monday
is there one stop with the us air boston leaving at 705 to atlanta
find me the earliest flight from boston to atlanta on any day of the week
what are the flights from chicago to indianapolis
is there a red eye flight from san jose to nashville on wednesday the nineteenth of may
airline code as
give me all flights from new york city to las vegas that arrive on a sunday
show me the flights from boston to denver
i need a flight from tampa to montreal
cheapest flight from memphis to miami
show me the flights on continental from indianapolis to san diego in the afternoon tomorrow
show me the fares on all flights round trip from pittsburgh to oakland
please list the flights from washington dc to atlanta
i would like to fly to baltimore
show me first class flights from pittsburgh to san francisco on friday
all do you have a flight from washington to boston that stops in philadelphia
show me round trip fares between san francisco and washington dc
what flights depart baltimore on friday and arrive in san francisco by 8 pm
i need a flight from new york to san francisco
please give me flights from atlanta to boston on wednesday morning and thursday afternoon
show me the flights from boston to denver on august second
what flight from boston to atlanta arrives earliest in atlanta
what is the earliest flight from boston to dallas fort worth leaving august eighth
i want to leave philadelphia and arrive in atlanta on a thursday
show me all the flights that go from baltimore to seattle
display all flights leaving from toronto to san diego on us air laying over in washington dc
i'd like to fly nonstop from atlanta to baltimore and get there at 7 pm
what are your flights from denver to baltimore
all flights from baltimore to philadelphia less than 1000 dollars
i need ground transportation in seattle
all flights and fares from atlanta to dallas round trip after 12 pm less than 1100 dollars
show me all flights from boston to dfw
does us air have a flight from toronto to salt lake city monday may thirty first
list all flights going from boston to atlanta before 7 o'clock am on thursday
i need to fly from baltimore to dallas on tuesday evening
what is ewr
what is the earliest morning flight leaving boston for washington
please give all flights from dallas to oakland california monday
do you have a united flight from boston to washington
please list the flights from new york to los angeles
what does fn under fare code mean
is fare code b the same as business class
can you show me what flights are available on december sixteen going from oakland to dallas
could you please give me a one way fare from pittsburgh to atlanta
i'd like to find a flight from charlotte to las vegas and make a stop in st. louis
flights from ontario to orlando
list united flights from denver to san francisco on wednesdays
show me round trip fares from baltimore to philadelphia
how much would car rental cost in atlanta
list daily flights from boston to oakland using twa
what is the smallest aircraft available flying from pittsburgh to baltimore arriving on may seventh
i need to fly from atlanta to charlotte north carolina next monday
what are flights between boston and pittsburgh on august tenth
what are the flights from denver to oakland
round trip fares from baltimore to philadelphia under 1000 dollars
flights from boston to pittsburgh
i'd like to leave from boston on tuesday and i'd like to leave sometime in the morning
please list the shortest one stop flight from ontario california to orlando florida
give me a list of airports in baltimore
show me the flights from oakland to washington
show me all the cheapest fares from new york to miami leaving on tuesday
please list all flights between boston and atlanta
what are connecting flights from chicago to seattle on june first
flying from pittsburgh to atlanta on september fourth what would be the cheapest flight
show me continental flights from chicago to seattle on saturday morning
show me the flights from boston to pittsburgh on wednesday or thursday
i would like a flight between denver and san francisco leaving from denver in the afternoon and arriving at 5 pm
i'd like to fly late tomorrow from minneapolis to long beach
train to newark
dallas to oakland saturday
does american airlines fly from philadelphia to san francisco
what is your cheapest flight from pittsburgh to denver
what is the earliest flight from boston to san francisco that serves a meal
show me flights from denver to philadelphia on a monday
what flights are available from boston to atlanta on july seventh 8 am
show me times for coach flights between boston and baltimore on wednesday
show me flights from denver to san francisco on wednesday
could you tell me the flights leaving pittsburgh around midnight for oakland
us 201
what flights do you have leaving boston going to san francisco
how many first class flights are provided by american airlines
list all the takeoffs and landings at general mitchell airport
show me flights from denver to philadelphia
i have two friends that would like to visit me on wednesday here in washington dc one of them lives in denver and the other lives in miami
what is the fare code y and what is the fare code h
find travel arrangements for a round trip flight from baltimore to pittsburgh
which airlines fly between boston and baltimore
i want a one way ticket from dallas to baltimore
what ground transportation is available in charlotte
show me flights from san francisco to minneapolis
what is the first flight after 12 noon from washington for denver
what time does twa depart from boston to go to san francisco
give me the flights with the fares from indianapolis to orlando on december twenty seventh
may i have a listing of flights from milwaukee to tacoma washington departing in the evening
what flights are available from dallas to atlanta with one way economy fares
i want a flight that leaves from charlotte to newark that leaves in the afternoon or evening
round trip fares new york to san jose
what's the lowest round trip fare from denver to atlanta
do any of the continental flights from boston to san francisco stop in denver
which airlines serve atlanta
what flights are available friday afternoon from atlanta to dallas
what flights go from philadelphia to san francisco via dallas
thank you i also need to travel next wednesday evening from dallas to san francisco
what is the ground transportation from boston airport to boston downtown
do you have a twa flight leaving early in the morning to san francisco from denver
flights from new york to miami
what is the name of the airport at denver
i want to find a flight from boston to atlanta
yes i need a flight from denver to pittsburgh on july seventh
what are the flights from orlando to cleveland on us air that arrive around 10 pm
what flights are there from pittsburgh to san francisco on friday
in economy class from dallas to baltimore arriving july seventh i'd like to know what's the cheapest ticket possible
can i rent a car in san jose too
give me a flight from newark to tampa on friday
i am looking for the cheapest fare from indianapolis to orlando on december twenty seventh
list all flights please from washington to san francisco
cheapest fare from indianapolis to seattle
what is the earliest flight from tampa to milwaukee tomorrow
i want to fly from baltimore to philadelphia
show me flights from milwaukee to orlando on thursday morning
i need to go from boston to denver and then to san francisco
please give me a flight from pittsburgh to san francisco monday
what flights leave philadelphia for dallas and depart before noon on american airlines
show me flights from atlanta to washington dc on wednesday evening
i would like a schedule of flights from san francisco to boston on wednesday
show me all the flights from columbus to baltimore
please list the flights from pittsburgh to baltimore arriving may seventh
could you please tell me the cheapest fare from atlanta to boston
show me ground transportation in san francisco
i would like a flight from philadelphia to dallas
on april twenty would like to fly from denver to pittsburgh at about 8 o'clock in the morning
i need information for a flight from denver to atlanta
which is the flight number for the us air flight from philadelphia to boston is it 279 or is it 137338
please show me airlines with flights from philadelphia to dallas
from denver to washington dc on monday november eleventh 1991
list all flights from denver to san francisco on wednesday afternoon
what flights leave washington dc and arrive in san francisco on wednesday
show me flights from philadelphia to oakland on friday
find a transcontinental flight on american airlines from boston to san francisco that makes a stopover in denver
i would like to see the daily flights from baltimore to philadelphia
what kinds of planes are used by american airlines
show me fares from miami to new york
i'd like to see flights from pittsburgh to philadelphia
what ground transportation is available from the pittsburgh airport
i want to go from san francisco to denver
okay i'd like a flight from boston to san francisco that leaves before 8 am
what's the cheapest fare for a round trip from indianapolis to orlando on december twenty seventh
what flights go from denver to san francisco
what ground transportation is available in atlanta
can you show me one way economy fares from dallas to atlanta
show me the cities served by canadian airlines international
i'd like a flight leaving atlanta august seventh and arriving in denver colorado august seventh leaving in the afternoon
price of flight from nashville to cleveland
what is the least expensive business class flight between boston and san francisco
which are the least expensive flights between dallas and baltimore on july nineteenth
list all round trip flights from orlando to kansas city
list daily flights from denver to boston
i would like a list of flights from pittsburgh to dallas
show me the flights from boston to pittsburgh
what does y mean
i need a return flight from denver to atlanta
list all us air flights from miami to cleveland leaving on sunday afternoon
i want to travel from kansas city to st. paul and be there by dinnertime
show me ground transportation in baltimore
show me the flights from baltimore to boston
on april sixth i would like to book an early morning flight from tampa to charlotte
please tell me which airline has the most departures from atlanta
does us air fly from washington dc to denver
does flight ua 281 from boston to denver leave on tuesday
list all trans world airline flights from indianapolis to houston that arrive in houston between 1030 am and 1130 am
show me flights from milwaukee to orlando on a thursday before noon
flights from atlanta please
what flights are available from san francisco to pittsburgh on thursday evening
how many flights come from denver to baltimore on july nineteenth
okay how about a flight on sunday from tampa to charlotte
list the fares of us air flights from boston to philadelphia
what about a car rental in denver
i am interested in a flight on an aircraft number 727 i would like to go from washington to atlanta
what are the classes of service for american airlines
what flights are there from charlotte to baltimore
what is the number of first class flights on american airlines
what flights are available from pittsburgh to baltimore on thursday morning
what flights from pittsburgh to newark after 1020 pm
what planes are used by twa
okay what i would like to know is does twa flight 505 from charlotte to las vegas with a stop in st. louis serve dinner that's twa flight 505 or 163
show all flights and fares from denver to san francisco
what does ls stand for
can you list flights from washington to toronto with the lowest one way fares
what is the aircraft type with the greatest seating capacity
i'd like a return flight from denver to atlanta evening flights
what is the fare going from baltimore to atlanta one way on november seventh
okay i've got somebody else who wants to take a round trip ticket from charlotte to montreal
flights from newark to cleveland 5 o'clock pm daily
what ground transportation is available in dallas
rental car in baltimore
interested in a flight from washington to fort worth
show me the earliest flight from newark to seattle
show me ground transportation for dallas
show me first class airlines from san francisco to pittsburgh on next tuesday first class only
show me the first class fares from baltimore to dallas
i would like a flight between boston and atlanta on any day at one in the afternoon
can you list all flights between milwaukee and chicago
show me all flights from boston to denver
flight from nashville back to milwaukee
flights from dallas to houston in the morning
lowest fare from san francisco to los angeles
i need to get downtown from the denver airport
what are the flights from atlanta to dallas
list flights from denver to philadelphia
display flights from dallas to atlanta which depart between 2 pm and 6 pm
find the cheapest flight from denver to atlanta with a stopover in pittsburgh
what are the classes of service on twa
show me the flights from pittsburgh to san francisco
what is the available ground transportation between the airport in denver and downtown
what flights leave from chicago to seattle on saturday
flights from pittsburgh to baltimore arriving between 4 and 5 pm
what flights from houston to milwaukee on friday on american airlines
show me all nonstop flights from salt lake city to cincinnati
what is the lowest fare united charges between boston and san francisco
show me the flights from boston to san francisco that stop in atlanta
what does us mean
what airlines fly boston to baltimore
i would like to see the flights from denver to philadelphia
round trip fares from denver to philadelphia under 1000 dollars and pittsburgh to philadelphia under 1000 dollars
show me all flights from pittsburgh to boston which leave before noon
how much does it cost to fly one way from boston to washington first class
i would like to fly to san francisco from washington dc
show me wednesday afternoon flights from denver to san francisco
show me the type of aircraft that canadian airlines uses
what is the seating capacity for the f28
i need to book a flight from newark to tampa on april fourth
i'd like to arrange a trip to baltimore on january first
show me flights from san francisco to seattle
list all united flights from boston to san francisco
what american airlines flights from phoenix to milwaukee depart phoenix after 6 pm on wednesday
boston to denver monday
tell me about flights from toronto to salt lake city
show me the cheapest one way flight from atlanta to pittsburgh
what are the fares for flights serving a meal from boston to pittsburgh before noon on thursday
list all the landings at general mitchell international
please tell me the flights between boston and philadelphia next thursday
i would like to book an early morning flight from tampa florida to charlotte north carolina on april sixth
flights from cleveland to kansas city on monday
how many seats in a 734
flights from denver to chicago on sunday on continental
give me flights from denver to baltimore
i would like an early morning nonstop flight from new york to las vegas on february twenty eighth
how far is the airport from san francisco
what are the flights from tacoma to san jose also on tuesday the eighteenth of may
show me flights from baltimore to boston
could you show me all flights from montreal to charlotte
show me flights from denver to atlanta on june sixteenth
i'd like to fly from denver to pittsburgh with a stop in atlanta
list number of people that can be carried on each type of plane that flies between pittsburgh and baltimore
what does mco stand for
what flights are available between baltimore and boston on august twelfth
what airline is as
ground transportation minneapolis
what flights depart baltimore and arrive by 8 pm friday in san francisco
show me a list of flights from denver to baltimore on united for august third
list all flights from indianapolis to seattle
tell me about flights from st. petersburg arriving in toronto before noon
list all flights from long beach to columbus late saturday
is there a flight on twa from baltimore to san francisco with a stop in denver
i'd like to know the earliest flight from boston to atlanta
i want the list of daily flights from milwaukee to st. louis
i would like a nonstop flight from jfk to las vegas on march second
what are the cheapest one way flights from atlanta to pittsburgh
can you list all flights from chicago to st. louis that depart after 12 noon
how far is oakland airport from downtown
what flights are available tomorrow from denver to philadelphia
flights from milwaukee to phoenix on saturday or sunday american airlines
i need a flight from philadelphia to dallas next wednesday in the morning
phoenix to newark on wednesday
i'd like flights going from boston to atlanta leaving on august sixth in the afternoon
show me flights to san francisco arriving before 1
i want to fly from philadelphia to dallas with a stop in atlanta on a breakfast flight
i would like some information on the earliest flights you have leaving atlanta arriving in denver
which airlines provide direct flights between washington and denver
i'd like to see all flights from pittsburgh to philadelphia again
what flights go from san francisco to washington via indianapolis
what's the latest flight i can get from dallas to boston
what airlines are ac and as
what are the first class and coach fares for flights from chicago to kansas city arriving around 7 pm next thursday
does us air fly from dc to dallas
now i'd like to see flights from detroit to st. petersburg on the next tuesday
what is the earliest flight departing san francisco and arriving in oakland on november eighth
what is the round trip cost of a first class ticket from boston to san francisco
i would like a flight from san francisco to pittsburgh on friday morning after 10 o'clock
show me all the us air flights leaving pittsburgh between 12 and 4 in the afternoon
please list the afternoon flights from charlotte to minneapolis
what are the flights from charlotte to atlanta returning on tuesday july thirteenth
list all flights from burbank to denver
do you have any flights united airlines from dallas to san francisco
what are the fares between new york and la on monday morning
show me the flights from pittsburgh to baltimore
what northwest flights leave denver before noon
show me flights from new york to miami
what is the earliest flight you have that leaves philadelphia to dallas
list all flights on continental leaving denver on monday
show me flights from dallas to atlanta on tuesday
what is the least expensive flight from denver to atlanta
i'd like to know the latest flight from atlanta to boston
find any flight from boston to oakland stopping in denver
i'd like a flight from baltimore to boston as early in the morning as i can
i would like to fly from denver to boston
i would like a flight on continental airlines leaving from boston making a stop in denver and arriving in san francisco
show me a list of flights from denver to san francisco for september first 1991
list flights from san jose to houston next sunday
what flights are available from dallas fort worth to atlanta
what is restriction ap57
what about a flight from boston to san francisco stopping in denver
denver to philadelphia monday
a one way flight from boston to san francisco please
what flights go from boston to orlando
how many flights does each airline have with first class service
do you have a 9 o'clock flight from boston to philadelphia
what's the capacity of a 733
what delta flights from cincinnati to new york city arrive at new york city before 6 pm on saturday
list flights from philadelphia to san francisco thursday
find me the latest return flight from atlanta to boston on the same day
i want to fly from milwaukee to orlando on wednesday evening
show me all first class fares from new york to miami leaving on a tuesday
which nonstop flight from atlanta to oakland leaves in the afternoon and arrives at 5 pm
please list the flight times from pittsburgh to newark
does any airline have an early afternoon flight from boston to denver
what is the least expensive one way ticket from atlanta to denver leaving on october twelfth
give me morning flights from atlanta to baltimore
what are the cities that american airlines serves
rental cars in boston
what's the cheapest one way ticket from baltimore to atlanta
show me round trip fares from new york to miami
all delta flights to everywhere if you can
i would like to leave around 7 o'clock in the morning
list flights from atlanta to boston on wednesday afternoon
i need information on flight from atlanta to denver
i need a flight this sunday from miami to las vegas and i would prefer a morning flight
show me nonstop flights from miami to new york with coach class fares
tell me about flights from charlotte to atlanta next tuesday
list all flights from baltimore to philadelphia
what ground transportation is available in san francisco
please list the flights from new york to miami on a tuesday
show me the airlines with first class flights
show me round trip first class tickets from new york to miami
may i fly from san francisco to baltimore
i need a flight from denver to philadelphia on saturday
what are all the available meals
show me flights from boston to san francisco arriving before 1 pm
what is restriction ap80
i'd like to go from boston to san francisco stopping in pittsburgh
what flights are there from dallas to houston
what is the round trip first class fare on united from boston to san francisco
what are the rental car rates in dallas
i'd like to find the earliest flight possible from san francisco to atlanta
could you tell me what flights you have that run daily from boston to san francisco please
which airline has the most business class flights
what flights are there from dallas to pittsburgh on monday morning
flight from dallas to milwaukee
okay what flights are there us air from orlando to cleveland leaving in the afternoon
show me all flights with fares from pittsburgh to san francisco
united airlines stopping in denver
is there a flight tomorrow morning from columbus to nashville
show me all united airlines first class flights
lowest fare from san francisco to orlando
which airlines have daily flights from boston to dallas
show me flights arriving in baltimore from pittsburgh between 4 and 5 pm
does american airlines fly from philadelphia to dallas
please show me all round trip flights from burbank to tacoma
i need a flight from san francisco to boston that leaves after 10 pm
list all flights from chicago to seattle on continental which depart on saturday and serve meals
show me the flight schedule from pittsburgh to san francisco
show me flights to dallas from san francisco and atlanta and pittsburgh
find travel arrangements for a round trip flight from boston to pittsburgh
what is the latest flight i can take from washington to san francisco
show me times for flights from san francisco to atlanta
show flights from new york city to las vegas
list the earliest flights from st. paul to san jose
list all the flights that arrive at general mitchell international
show me non first class flights from baltimore to dallas
please list the american airlines flights from philadelphia to dallas on tuesday october first
i would like a nonstop flight from new york to las vegas on march second
do you have an american airlines flight from denver to san francisco in the early morning
flights from montreal and phoenix to las vegas arriving at the same time
all flights to baltimore after 6 pm
show united flights between pittsburgh and baltimore
what airlines fly from boston to pittsburgh
show flights from pittsburgh to oakland
an early flight on wednesday morning from baltimore to newark
i would like to schedule a flight on american airlines from philadelphia to san francisco that makes a stop in denver
what does ap57 mean
show the flights from milwaukee to orlando on a thursday morning
flight from denver to salt lake city
show flights between philadelphia and denver on september sixteenth
what is the airfare from pittsburgh to atlanta
what type of aircraft is used on american airline flight 315
ground transportation atlanta
what's the latest flight from san jose to houston
show me the american airline flights leaving phoenix on wednesday and arriving in milwaukee
show me all flights arriving at love field from other airports
show me all flights both direct and connecting to either san francisco or oakland from boston that arrive before 2 pm
find the flights from boston to san francisco leaving after 6 pm
what is the fare going from boston to dallas fort worth one way on november seventh
all flights from boston to washington dc on november eleventh
i would like to find a flight from pittsburgh to boston on wednesday and i have to be in boston by one so i'd like a flight out of here no later than 11 am
show me the latest dinner flight from baltimore to oakland
show me flights from pittsburgh to san francisco on monday
what does ua stand for
flight information from san francisco to pittsburgh
show me all flights arriving to denver from boston
flights from newark to boston
show me all flights from toronto
show me flights from baltimore to philadelphia
how much does dl 746 cost
show me the flights from san francisco to boston
what flights on united leave la guardia for san jose and arrive around 10 pm
where is mco
list all flights on continental from denver to chicago on sunday which depart after 934 pm
show me flights on september twenty sixth please
please list the thursday morning flights from st. louis to st. paul
tell me about flights from salt lake city to st. petersburg
i want information on flights from atlanta to washington dc i want to leave after 4 pm on wednesday or before 9 am on thursday
what flights go from newark to boston after 5 pm
i'd like to arrange a flight from pittsburgh to atlanta
please list the sunday flights from dallas to houston on american airlines
what are your flights from dallas to baltimore
what ground transportation is available in boston
show me flights from milwaukee to orlando on wednesday after 6 pm
what flights are available from denver to philadelphia with stopover in pittsburgh
i need a flight from logan to atlanta this afternoon
i would like information on flights from dallas fort worth to atlanta on wednesday morning
i need a list of late afternoon flights from chicago to milwaukee
continental airlines on saturday from chicago to seattle
and what is the last flight from denver to boston for tomorrow evening
actually what are the nonstop flights from las vegas to burbank on saturday may twenty two
flight from ontario to orlando that departs 9 hours before arriving
list all flights arriving and departing at general mitchell international
is us air
what united airlines flights go through denver
i'd like to find a us air flight from orlando to cleveland that arrives around 10 o'clock in the evening
i need a flight from toronto to montreal reaching montreal early on friday
i need to go to pittsburgh and denver
please give me all flights from long beach to memphis
what is the last flight to atlanta from baltimore
what flights go from denver to atlanta
can you list all flights from chicago to milwaukee
show me the cheapest fares from san diego to miami one way
i need a flight from philadelphia to denver on sunday
one way
all right now i need a flight from seattle to san diego
flights from cleveland to kansas city
could you tell me the cheapest fare from atlanta to boston on thirty first of august
what economy flights are available from dallas to baltimore on july twenty fifth 1991
what are fare codes qw and qx
tell me about flights on american airlines from dallas fort worth to philadelphia on june twenty ninth
i'd like to see all the flights with their fares from denver to atlanta
show flights from philadelphia to boston
show me flights from denver to washington dc on wednesdays
i'd like information on all the flights from san francisco to pittsburgh on tuesday
on eastern flight 825 from atlanta to denver can you tell me what type of aircraft used before 12 noon
is there ground transportation in boston from the airport
what is american's schedule of morning flights to atlanta
how many first class flights does united airlines have departing from boston today
what nonstop flights between boston and washington arrive after 4 o'clock pm
show me all the flights from indianapolis to san diego on us air
okay i just want to know the cheapest fare from atlanta to boston
show all flights leaving monday morning from boston to pittsburgh
show me flights from atlanta to washington dc leaving on thursday
i need to go from boston to dallas
houston airports
what is dl
when can i fly from philadelphia to dallas on a saturday morning
which companies fly between boston and oakland
i need a flight from denver to pittsburgh on july seventh that leaves in the afternoon
what are the flights from las vegas to burbank also on saturday may twenty two
round trip first class fares new york to miami
please list ground transportation in atlanta
please find me a flight between boston and philadelphia that arrives in philadelphia close to 5 pm
show me the nonstop flights from houston to dallas
show me the flights from all airports to love field
show flights between boston and denver
what transportation is available from the dallas airport to downtown
i would like to travel from denver to pittsburgh
show me the flights from denver to philadelphia on a saturday
list possible round trip daily flights between boston and oakland
cheapest fare from indianapolis to seattle
what flights leave chicago and arrive in detroit around 6 pm next tuesday
give me the one way flights from pittsburgh to boston
what flights are available on dl from dallas to atlanta on monday morning
give me a list of all the flights from baltimore to philadelphia or denver to philadelphia or pittsburgh to philadelphia
give me all flights from boston to philadelphia next week arriving after lunch
how many flights has continental into and out of atlanta
what does restriction ap 57 mean
explain restriction ap80
list the nonstop flights from miami to new york on a sunday along with the fares that are less than 466 dollars
i would like to book a flight from los angeles to pittsburgh on june first
show me the flights from boston to pittsburgh leaving wednesdays and thursdays
what ground transport is available in baltimore
give me flights on american airlines from milwaukee to phoenix
show me flights from boston to pittsburgh after 1700 hours on wednesday
dl 296 denver to philadelphia what is the fare
show me flights on sunday going from san francisco to boston nonstop first class leaving after 12 noon
which delta flights fly from boston to philadelphia
show flights from pittsburgh to oakland
please give me the flights from san francisco to washington dc
what flights are there from indianapolis to orlando
give me the latest flight tomorrow on united airlines from milwaukee to tacoma
what flights leave boston and arrive in philadelphia before 7 am
can you show me what fares are available from oakland to dallas on december sixteenth one way only
do you have a united flight from dallas to san francisco
show me the flights available from san francisco to pittsburgh for tuesday and also the price
list flights between oakland and san francisco
what is the latest flight leaving washington for denver
i need a flight after 6 pm on wednesday from oakland to salt lake city
show me some information on making a reservation from philadelphia to denver on sunday
only show continental flights
flights from westchester county to st. paul
tell me about ground transportation between orlando international and orlando
earliest flight from atlanta to philadelphia
what is the least expensive business class flight between atlanta and dallas
on monday show me flights from baltimore to dallas
find me the earliest flight from boston to atlanta and the latest return to boston on the same day
list all flights from nashville to seattle
information on flights from boston to washington
show me the flights on twa to atlanta in the morning
i want a flight from boston to denver that stops in pittsburgh
is there limo service at pittsburgh airport
list the flights from philadelphia to san francisco which have a layover in dallas
i want to fly from cleveland to san diego tomorrow and stop in indianapolis
i want to fly from boston to dallas
show me the coach fares from baltimore to dallas
flights to baltimore
what is your last trip from washington to boston on august twenty seventh
show me the flights from san francisco to washington dc
are there any continental flights between dallas and boston
show me the flights from philadelphia to dallas with a stop in atlanta
i am interested in a flight on american airlines from dallas to washington
show me all flights from pittsburgh to philadelphia which arrive before 8 o'clock am on wednesday
show me flights from boston to washington on monday
all one way flights between boston and philadelphia
i'd like to buy a coach class ticket from denver to atlanta with a stopover in pittsburgh
i would like to plan a flight on american airlines from boston to denver
what flights from houston to milwaukee on friday in the evening on american airlines
show me us air flights from pittsburgh to san francisco first class on monday
please show me flights from boston to denver with a stopover in philadelphia
i need a flight from charlotte to newark leaving today evening
flights from pittsburgh to baltimore between 10 am and 2 pm
on friday i need to see all flights that leave atlanta and arrive in dallas before 6 pm
list the flights from san francisco to philadelphia on american airlines
could you please find me a nonstop flight from atlanta to baltimore on a boeing 757 arriving at 7 pm
i would like to find the cheapest one way fare from boston to oakland
what flights are there from houston to dallas
how expensive is the san francisco limousine service
what are the flights from dallas to boston for tomorrow night or evening
please list available ground transportation in pittsburgh
is there a united flight from baltimore to san francisco on the morning of august twenty seventh
an american airlines flight first class from philadelphia to dallas
what is the cheapest round trip fare on continental 1291 round trip denver san francisco
what type of aircraft is used on the flight from atlanta to philadelphia before 12 o'clock noon
what does the abbreviation ua mean
thank you very much now can you help me with information on flights from boston to atlanta
how much does flight ua 270 from denver to philadelphia cost
may i have a listing of flights on monday from minneapolis to long beach california please
what's the last flight from atlanta to boston
show me the evening flights from baltimore to atlanta
can you show me flights from dallas to atlanta on tuesday night
what flights from phoenix to las vegas on saturday
show me flights with first class reservations from san francisco to pittsburgh for monday
what do you have going from atlanta to philadelphia serving breakfast
list all flights from pittsburgh to philadelphia
show me all flights and fares from dallas to san francisco
i would like to fly from atlanta to philadelphia
i'd like to book a flight from columbus to nashville please
give me flights from atlanta to baltimore
the cheapest flights from atlanta to philadelphia that arrive after 12 pm on a tuesday
could you tell me about flights from philadelphia to dallas the flights should leave philadelphia in the morning
give me the flights from salt lake city to new york city arriving before 6 pm
round trip flights between new york and miami
show the flights from san francisco to pittsburgh
locate flights from philadelphia to dallas stopping in hartfield
i'm interested in a flight on american airlines from dallas to washington
i would like to fly from denver to boston on wednesday the twenty first
are there any flights from denver to pittsburgh with a stopover in atlanta
flights from memphis to las vegas on sunday
american airlines from phoenix to denver
flights from phoenix to milwaukee
show me all flights from boston to pittsburgh on wednesday of next week which leave boston after 2 o'clock pm
can you tell me the flights that go from boston to atlanta sometime after 5 pm
what flights do you have from milwaukee to tampa
show me all the flights on northwest airlines from new york to milwaukee to los angeles
does dl stand for delta
which flights are between boston and baltimore washington
flights from denver to seattle on saturday morning on continental
i want a flight on twa from boston to san francisco
first class round trip airfare from indianapolis to memphis
please list the morning flights from st. louis to st. paul
show flights first class on american airlines between dallas and philadelphia
give me the continental flights from chicago to seattle on saturday morning
flight will start from boston
show me the flights from denver to atlanta on friday
round trip flights between houston and las vegas
show me continental flights leaving chicago on saturday morning
what flights are available friday from philadelphia to oakland
list the nonstop flights on wednesday june second from miami to baltimore arriving in baltimore between 1115 am and 1245 pm
list all the airlines that service denver
show me the type of aircraft that cp uses
what is the latest flight between washington and boston
what are the different classes of service and the prices for us air
please list nonstop twa flights from las vegas to new york
would you tell me the cheapest one way fare from boston to oakland
please list all flights from denver to philadelphia two saturdays from now
does american airlines offer a flight from boston to oakland which stops in denver
show me the flights from salt lake city to milwaukee
please give me the flights available from boston to pittsburgh on wednesday of next week
what flights go from boston to san francisco with a stop in dallas
what's the last flight from houston to dallas
flights from denver to pittsburgh on wednesday
what does restriction ap 57
now i'd like flights from philadelphia to pittsburgh leaving between 430 and 530 pm
what airline is dl 98
list all the flights that arrive at general mitchell international airport
can you give me information on all the flights from san francisco no from pittsburgh to san francisco on monday
i'd like to fly from atlanta to denver on august twenty ninth
please find the cheapest fare from boston to san francisco
on the 8 am flight from san francisco to atlanta what type of aircraft is used
american airlines leaving phoenix
what kind of ground transportation is available in las vegas
i need a flight tomorrow from columbus to minneapolis
what is the most expensive flight from boston to dallas round trip
please inform me the type of aircraft used on a flight from atlanta to denver before 12 o'clock noon
show me flights from tampa to st. louis
what is the ground transportation between airport and baltimore
show me the flights from love field
a listing of all flights from boston to baltimore before 10 am on thursday
flying from pittsburgh to philadelphia on us air
show me dallas ground transport
i want a flight from denver to atlanta
please show me airlines with round trip flights from boston to denver stop philadelphia
what is the cheapest flight from dallas to baltimore
please show me flights from dallas fort worth to atlanta on monday
what are the flights between pittsburgh and baltimore on august tenth
list all united flights from philadelphia to san francisco
what is the latest flight available between san francisco and boston
show me the airlines between boston and toronto
oh let's see does eastern airline have a flight from atlanta to washington
i would like to book a flight on june first from los angeles to pittsburgh in the late afternoon
may i have a listing of flights from long beach california to columbus ohio on wednesday
i would like an early morning flight from chicago into seattle on june first on continental airline
what are the flights from san francisco to washington dc
all right what do you have from oakland to philadelphia on wednesday
what type of aircraft flies from pittsburgh to baltimore
are there any flights from new york to montreal canada leaving on thursday
list daily flights from boston to oakland using continental airlines
what airlines fly from boston to pittsburgh
cheapest round trip airfare from tacoma to orlando
which transcontinental flight on united airlines from boston to dallas makes a stopover in philadelphia
how much is a round trip fare from memphis to seattle
i want a direct flight from oakland to boston that leaves on a wednesday
what's the latest flight from houston to dallas
which are the flights from denver to baltimore or washington dc
what about flights from boston to san diego
i need a flight from san francisco to philadelphia
how much does it cost to go from downtown to logan airport
show me oakland to dallas flights
what flights from dallas to houston on sunday
show me flights from baltimore to dallas
information on flights from philadelphia to san francisco
list all flights from baltimore to san francisco on friday
what are the coach fares for flights from pittsburgh to denver
i would like to fly from denver to pittsburgh
list ground transportation in detroit
what is the cheapest flight from long beach to memphis
show me all flights from san francisco to boston philadelphia or baltimore
flight from denver to philadelphia
us 3724 baltimore to philadelphia what is the round trip fare
can you show me the economy fare flights from baltimore to dallas
what flight from denver to pittsburgh arrives earliest in the morning
display all flights from toronto to san diego on us air with a layover in phoenix
what is restriction ap 57
show me the flights to love field from all other airports
what are the flights from milwaukee to orlando on thursday
show me flights from baltimore to philadelphia
show me the one way flights from atlanta to pittsburgh
what flights are available thursday afternoon from baltimore to atlanta
list all flights going from boston to atlanta after 6 o'clock pm on wednesday
please list the flights from dallas fort worth to boston on july twenty third
i need to know a list of flights from atlanta
denver to san francisco wednesday
what flights go from pittsburgh to baltimore after 8 o'clock next wednesday
all flights from washington to san francisco leaving after 2
what is the fare going from baltimore to boston one way on november seventh
what is the lowest price fare from atlanta to san francisco on flight delta 82 and delta 139
show all flights from pittsburgh to oakland
please book for me a flight on twa from washington dc to san francisco earliest possible time
how many flights does each airline have with business class service
which flights on united airlines and northwest go through denver
show me early friday morning flights from san francisco to boston
list all flights going from boston to atlanta after 6 o'clock on wednesday and before 7 o'clock am on thursday
does delta fly from atlanta to san francisco
airline and flight number from columbus to minneapolis
flight numbers from columbus to minneapolis tomorrow
and i'll need ground transportation for tuesday july sixth to wednesday july seventh in san diego
show me the flights from baltimore to philadelphia
i would like to see the flights from denver to philadelphia please
what does us mean
give me the flights from phoenix to milwaukee on wednesday
of all airlines which airline has the most arrivals in atlanta
please show me the philadelphia to denver saturday flights again
what flights from las vegas to phoenix on saturday
flight information from pittsburgh to denver
show me all flights from pittsburgh to baltimore on thursday
please show me flights from atlanta to oakland california on thursday after 1600 hours
show me the nonstop flights from dallas to houston
i want to fly from boston to san francisco
i want to go from boston to washington on monday morning
please list flights from philadelphia to dallas stopping in atlanta
i would like flights between boston and atlanta on july eleven departing at one in the afternoon
what is the earliest flight between boston and washington
what flight from boston to baltimore is the least expensive flight
what is fare code h
all flights from pittsburgh to philadelphia that arrive at 6 o'clock next tuesday
show me flights from san francisco to dallas please
please show me all one way first class flights from indianapolis to memphis
i would like a flight from atlanta to dallas on friday that arrives in dallas by 6 pm
what flights go from tampa to charlotte on sunday
what is the cheapest first class fare from cleveland to miami on us air on february twenty fourth
show sunday flights from seattle to chicago
please list the wednesday american airline flights from milwaukee to san jose
show me flights from pittsburgh to philadelphia on wednesday morning
what's the cheapest flight from san francisco to boston
is there a flight between san francisco and boston with a stopover at dallas fort worth
okay can you tell me the earliest flight which leaves from philadelphia to dallas
please list all airline flights between denver and boston
please list pm flights from boston pittsburgh
information on flights from atlanta to washington dc departing on thursday before 9 am
show me the earliest flight from boston to denver
do you have a flight from boston to san francisco with a stopover in fort worth dallas
show last flight from philadelphia to boston
what is ord
how much does it cost to fly from boston to baltimore on a saturday
how many american airline flights leave denver june tenth
show me flights on monday from philadelphia to boston after 7 am
i need flight information on thursday leaving pittsburgh and arriving in baltimore in the morning
hi could i get a one way ticket from milwaukee to orlando
united airlines flights stopping in denver before noon
show me the flights from washington dc to san francisco with a stopover in denver
what does the airline code dl stand for
what flights do you have from burbank to tacoma washington
does midwest express have any flights
can you list flights departing from las vegas and arriving in san diego
please list the prices for a rental car in pittsburgh
show me the dinner flights from baltimore to oakland
i'd like to fly from boston to fort worth
what ground transportation is available at baltimore
show me flights from san francisco to denver
list all flights from boston to oakland
what flights from minneapolis to pittsburgh
what are the cheapest fares for flights from newark to la leaving wednesday after 3 pm
can you list all nonstop flights departing from st. petersburg and arriving in charlotte
what flights do you have today from san francisco to pittsburgh
show me flights to philadelphia coming from baltimore or denver or pittsburgh
show me the flights from boston to san francisco leaving after 4 pm on friday
show me the flights from st. petersburg to salt lake city that arrive before noon
what are the afternoon flights from denver to san francisco
show all nonstop flights from boston to atlanta
show me the nonstop flights from atlanta to oakland that leave in the afternoon and arrive between 430 pm and 630 pm
what's the cheapest flight from baltimore to dallas on american
what's the cheapest way to fly between atlanta and denver
flights from cleveland to miami
show me all flights from baltimore to san francisco
could you find me the cheapest fare from boston to san francisco
i want a round trip fare from new york to san jose
show me flights from tampa to st. louis leaving before 10 am
what is the least expensive flight from atlanta to denver leaving on october twelfth
show me the monday flights from san francisco to pittsburgh
list the earliest flights from atlanta to denver on a monday
flights on friday from newark to tampa
are there any flights from atlanta to baltimore
list all afternoon flights leaving baltimore and arriving in atlanta on thursday
flights from atlanta august second
show all flights philadelphia to dallas
are there any 4 o'clock flights from washington to denver
give me american airlines flights from milwaukee to phoenix on saturday and on sunday
show me the flights from dallas to baltimore with a fare of 415 dollars
please give me evening flights leaving philadelphia to san francisco friday
show me the flights from denver to atlanta
is there a flight from denver to san francisco on continental airlines leaving after 12 o'clock in the afternoon
what is the earliest flight leaving from boston going to atlanta
how far is it from orlando airport to orlando
i need a flight from pittsburgh to boston on wednesday the fourteenth
list lowest cost flight from dallas to baltimore
what delta flights fly from washington to dallas in the morning
what is the cheapest fare from washington to san francisco
i would like a nonstop flight from memphis to las vegas on march second
now i need flight information leaving atlanta and arriving in baltimore in the afternoon
show me the earliest flight on thursday from atlanta to washington
please show me airlines with service from boston to denver
show me the flights from love field
what is mia
flights from chicago to denver on continental on saturday morning
can you tell me what aircraft is used for delta flight 1222 from kansas city to salt lake city
show me all the delta flights leaving or arriving at pittsburgh between 12 and 4 in the afternoon
what night flight do you have from san francisco to denver on united on the evening of august twenty seventh
show me the flights from san francisco to boston
i live in washington and i would like to make a trip to san francisco can you tell me which airlines connect with those two cities
list united flights from denver to san francisco on tuesdays or wednesdays
can i have a rental car in houston
what is the earliest flight in the morning to arrive in baltimore from boston
i'm trying to find the flight number from a flight from orlando to cleveland on us air and it arrives around 10 pm
for each airline flying between boston and san francisco what is the earliest flight
show me the flights from atlanta to philadelphia
show flights between toronto and san francisco
fares and flights from baltimore to philadelphia
flight leaving chicago to nashville
what is the coach fare between boston and atlanta on delta
i would like an early flight from la to charlotte monday morning
flights from kansas city to cleveland
i would like a flight from philadelphia to dallas arrive dallas about 12 noon
now i'd like information on flights from denver to san francisco
list the flights arriving in baltimore from boston before 10 am on august third
find me a flight from boston to san francisco with layover in denver on united
what round trip flights between atlanta and denver qualify for fare code qx
where does canadian airlines international fly to
show me fares from seattle to minneapolis
all flights from san francisco to boston leaving before noon
show me all flights from minneapolis to san diego that arrive before 7 pm
can you show me economy class one way fares for flights from oakland to dallas on december sixteenth
what are the flights from denver to baltimore on august tenth
give me the flights on tuesday from los angeles to pittsburgh
i need information on flights for tuesday leaving baltimore for dallas dallas to boston and boston to baltimore
where does delta fly to that american doesn't
from las vegas to montreal
can i get a taxi from long beach airport to downtown long beach
what's the earliest flight from san jose to houston
show me the flights from boston to dallas
what ground transportation is available in denver
what flights leave san francisco on monday night and arrive at atlanta later in the evening
what flights are there available from philadelphia to denver on wednesday with economy class
what flights from pittsburgh to newark on monday
i am interested in booking an early flight from dallas into houston and returning in the late evening
what flights are there from new york city to las vegas
i would like to see the flights from baltimore to philadelphia again
give me a flight from newark to tampa on friday
give me flights from atlanta to baltimore
i want a flight from los angeles to pittsburgh that arrives before 3 pm on tuesday
what flights go from san francisco to denver on mondays
hello i'm trying to find a flight that goes from pittsburgh to denver after 2 pm
i want to know the cheapest way to fly from denver to oakland
what does co mean
give me flights from baltimore to denver on united that offer first class
does midwest express serve indianapolis
i need to catch an evening flight from boston to philadelphia on august first
what type of plane is an m80
i would like to fly from boston to baltimore what time are the flights in the afternoon
i would like information on flights from pittsburgh to baltimore arriving in baltimore before 10 am on thursday
show me all the twa flights from indianapolis to houston that arrive around 11 am
what flights from pittsburgh to atlanta on wednesday morning serves breakfast
i would like to find flights from columbus to minneapolis on monday june fourteenth early in the morning or in the evening sunday june thirteenth thank you
show me flights from all airports to love field
what kind of ground transportation is there in denver
list the flights and time of arrival for flights arriving in dallas fort worth from boston before noon
show me flights from pittsburgh to atlanta on monday morning
i am interested in booking an early morning flight from dallas into houston and returning in the late evening
show me the airlines that use love field
show me the flights from pittsburgh to san francisco for thursday night or friday
can you show me the available flights from baltimore to dallas with economy fares
in boston is there ground transportation between airport and downtown
please list available flights for next saturday from philadelphia to dallas
please list flights between san francisco and denver
show me all flights with fares from pittsburgh to san francisco
what is the airfare for flights from denver to pittsburgh on delta airline
i would like a flight from oakland to philadelphia at one in the afternoon arriving at 5 pm
find all flights from philadelphia to dallas stopping in atlanta
list all direct flights from boston to denver
i'd like to fly between boston and san francisco
tell me about ground transportation at salt lake city
show me the lowest priced fare from dallas to baltimore
all flights from sfo to long beach
show me fares leaving on tuesdays from denver to dallas
show me a list of rental car fares at boston airport
in the month of december are there any flights from atlanta to denver that stop in boston
can you give me information on transportation from the airport in philadelphia to downtown philadelphia
what's the smallest plane flying from pittsburgh to baltimore on december seventeenth
what flights from milwaukee to san jose on wednesday on american airlines
show me boston to oakland flights
what about the eastern airlines flights arriving in pittsburgh between 12 and 4 in the afternoon
what is the thrift economy flight fare from washington to san francisco
please tell me the times of the flights between boston and baltimore
list all daily flights between oakland and boston using american airline
i need flights that arrive in baltimore from pittsburgh
show me all the flights to baltimore after 6 o'clock pm
what is ewr
airports in new york
please give me a list of flights leaving boston going to pittsburgh
i'd like to fly from cleveland to indianapolis tomorrow morning as early as possible what's available
show me the most expensive one way first class fare from baltimore to dallas
what is bna
what types of aircraft can i get a first class ticket from philadelphia to dallas
list flights from atlanta to boston on wednesday afternoon
show me flights leaving from denver colorado to pittsburgh pennsylvania on wednesdays after 5 pm
what kind of ground transportation is available in atlanta
are there any flights after 9 pm from san francisco to washington
please list the monday morning flights from kansas city to atlanta
how many flights does eastern airlines have from boston to atlanta
ground transport phoenix
what flights are there from pittsburgh to los angeles
could you please give me the cost of a round trip flight from denver to pittsburgh
what is the least expensive fare from baltimore to san francisco leaving on september thirtieth
on the earliest flight from san francisco to atlanta on delta is a meal being served
what is the latest flight from salt lake city to phoenix
what is the latest evening flight leaving san francisco for washington
very well i'm working on scenario three i'm interested in a flight on a 727 from washington dc to atlanta georgia
show me all flights from san diego to dulles on boeing 767
what are my options for a minneapolis back to indianapolis flight around noontime
what flights from new york to los angeles after 10 am
what is the first flight arriving in montreal from toronto friday
show me the flights from pittsburgh to philadelphia
show me the itinerary for the connecting flight from dallas fort worth to san francisco that departs dallas fort worth at 1940
show me ground transportation information for dallas fort worth
san francisco to boston please with a stopover in denver
what's the cheapest flight from pittsburgh to san francisco on friday
i'm looking for a flight from pittsburgh to san francisco
flight information between washington and denver on september third
show me the flights from baltimore to oakland
i need information for flights leaving san francisco on thursday evening and returning to boston
i would like a flight on american airlines from baltimore to san francisco with a stop in denver
all flights from charlotte to anywhere on us air around 1 pm
which airlines fly from boston to washington dc via other cities
what's the earliest flight from pittsburgh to baltimore on thursday morning
what ground transportation can i take into boston
display all flights from baltimore to dallas on july twenty ninth
what are the morning flights in the next two days from nashville to tacoma
what is the cheapest ticket from baltimore to san francisco on friday august thirtieth
what flights stop in atlanta before noon
show me all the flights from philadelphia to newark
i need a flight on sunday from long beach to columbus
i need a flight from boston to san francisco leaving in the afternoon and arriving in the evening thank you
all flights from boston to philadelphia which show up on tuesday afternoon
give me us air flights for next wednesday from cleveland to miami
show flights from pittsburgh to oakland
flights from cincinnati to denver on american airlines
i would like to know the flights from denver to pittsburgh leaving on monday
what does the meal code s stand for
which flights from memphis to tacoma also stop in los angeles
list lowest cost flight from dallas to baltimore that serves a meal
what is the ground transport in denver
show all flights from boston to denver on july thirty first
what flights leave seattle on sunday on continental
all flights from montreal less than 150 dollars
what types of aircraft does delta fly
i would like to book a flight on us air first class from cleveland to miami on february twenty second
find a nonstop flight between denver and oakland leaving in the afternoon and arriving near 5 pm
list flights from dallas to san francisco
i'd like to go from boston to san francisco
flights on twa from columbus to st. louis
give me the earliest flight on american airlines tomorrow from st. petersburg to milwaukee
i need information on ground transportation from the airport in atlanta
what is fare code qo mean
what flights takeoff and land at general mitchell international
give me flights that arrive in baltimore from denver
can you tell me the flights on october fifteenth 1991 from boston to oakland
what flights are available friday afternoon from pittsburgh to san francisco
give me the cheapest one way flights between boston and philadelphia which arrive after noon on a tuesday
show flights from atlanta to baltimore
i would like a flight from boston to atlanta
ground transportation atl to atlanta
what are the flights available in the morning between denver and san francisco
i would like to book a flight that goes from memphis to las vegas
please show me all airlines with sunday flights from philadelphia to denver
please give me all flights from long beach to memphis
what does ewr mean
list the flights from indianapolis to houston
show ground transportation for pittsburgh
show me all flights from philadelphia to atlanta that leave after 5 pm on wednesday
then list the flights from atlanta to philadelphia early wednesday morning nonstop
flights from washington august second
do you have ground transportation between airport and downtown in boston
are there any flights from milwaukee to tacoma on friday june eleventh
show me flights from san francisco to boston on thursday
what does fare code qx mean
what is the yn code
how many seats in a 100
show me the flights from boston to fort worth on the morning of july tenth 1991
show me the ground transportation schedule in san francisco on thursday evening
show me the flights from baltimore to atlanta
what are the flights from boston to baltimore
show me all flights from boston to pittsburgh on wednesday after 6 o'clock pm
i would like information on any flights from pittsburgh to san francisco leaving thursday evening
what is the earliest flight from atlanta to boston
what flights are there from boston to dallas
how much does the limousine service cost within pittsburgh
what flights go from boston to washington next tuesday
list all flights from long beach to columbus on sunday
i would like to book an early morning flight from tampa to charlotte on april sixth
do you have a flight from atlanta to boston that will stop in washington
show me all flight from san francisco to oakland
what flights are available from denver to dallas fort worth in the afternoons
what flights from kansas city to denver
show me the fare from dallas to san francisco
information on flights from pittsburgh to san francisco
what airlines fly into salt lake city
flights from st. paul to houston
what flights are available from boston to washington dc late the twenty fifth or early the twenty sixth
atlanta to oakland thursday
which airline is the cheapest to fly from dallas to baltimore on december twenty fourth
what flights can i find from pittsburgh to san francisco after 9 am
how much is a round trip fare from nashville to seattle
what is the total seating capacity of all aircraft of american airlines
what flights are available from pittsburgh to boston on saturday
newark to minneapolis on sunday
how do i get from the airport to downtown in tacoma
the cheapest flights between boston and philadelphia which arrive between 3 and 5 o'clock on tuesday
is there ground transportation in baltimore
flights from pittsburgh to newark
what is the smallest aircraft that flies from pittsburgh to baltimore arriving may seventh
what does restriction ap 80 mean
show me first class flights from new york to miami leaving on a tuesday
show me the flights on delta that go through atlanta
what is the most expensive flight from boston to dallas
give me flights from chicago to seattle on saturday morning
what flights from houston to milwaukee on friday on american airlines
find a flight from washington dc to san francisco on tuesday
what is the latest us air flight leaving philadelphia and returning to boston
what is the first flight that goes from atlanta to baltimore that serves breakfast
show flights first class on american from dallas fort worth to san francisco international
which airline provides business class flights
i want to go from boston to oakland
find the cheapest one way fare from pittsburgh to san francisco
list flights tomorrow from san diego to phoenix
what flights from boston to pittsburgh after 723 pm
is there a flight on american airlines going from boston to san francisco on june twenty eighth
show me all flights from new york to milwaukee on northwest airlines departing at 720 am
show me flights from san francisco to pittsburgh on a sunday
show me the flights from san diego to san francisco on southwest airlines
please show me again the first class fares from baltimore to dallas
i'd like to book a flight from denver to pittsburgh and i'd like to go on eastern airlines
do you have flights from st. petersburg to toronto on monday
what flights from tacoma to orlando on saturday
now i need a flight from detroit to san diego leaving tuesday evening
show me return flights from cincinnati to salt lake city nonstop
i would like to find flights from minneapolis to long beach after 4 o'clock on monday june fourteenth please
how many flights does twa have with business class
show me all the flights from montreal to detroit
please show me continental flights from san francisco to pittsburgh on friday
what is the last flight out of pittsburgh to boston in the evening on tuesdays
what kind of airline is flight ua 281 from boston to denver
san francisco to pittsburgh friday
what ground transportation is available from the pittsburgh airport to downtown and how much does it cost
does any airline have an afternoon flight from boston to oakland
what's the lowest round trip fare from bwi to any city
does the philadelphia airport have a name
on november twenty third what flights are available between boston and denver
show me the flight classes for delta airlines
show me all the one way fares from tacoma to montreal
what is sa
please give me the flights from denver to pittsburgh which leave in the morning on july second
what is the earliest flight from philadelphia to dallas first class
show me all flights from baltimore to dallas
show flights from denver into san francisco
what are the cheapest one way flights from pittsburgh to atlanta
find me the earliest flight from boston to atlanta on any day of the week
what flights are available from san francisco to pittsburgh on monday morning
list all flights on continental which leave seattle and arrive in chicago departing on sunday after 430 pm
what does flight code us mean
which airlines fly from boston to san francisco
could you please list all of the classes of flights there are
please list all of the flights leaving atlanta heading to baltimore after 8 pm wednesday and before 9 am thursday
show me flights from pittsburgh to atlanta on monday afternoon
show flights and fare information from pittsburgh connecting through denver to oakland
please list flights between denver and boston
show me fares from miami to new york
what flights does delta have between boston and san francisco
what kind of ground transportation is available in denver
okay on the following wednesday i'd like to go from memphis to cincinnati as early as possible
i need information on flights for tuesday leaving baltimore for dallas dallas to boston and boston to baltimore
i need a flight from san francisco to boston that leaves after 8 pm
does any airline have an early afternoon flight from boston to pittsburgh
please show me fares from denver to san francisco
show me all flights from denver to san francisco
also show me all flights from oakland to denver
what's the cheapest round trip fare between dallas and baltimore
i need a flight from atlanta to philadelphia and i'm looking for the cheapest fare
give me the flights from denver to baltimore on united airlines
i want to leave boston at 838 and arrive in denver at 1110 in the morning
what flights leave after 7 pm from philadelphia to boston
show me the flights from dallas to baltimore
show me all the flights from burbank
from toronto to atlanta in the afternoon
show me the latest flight from san francisco to denver
what are all the flights between san francisco and boston
i'd like to buy a coach class ticket for a flight from denver to atlanta
show me what fare codes symbols stand for
please list the flights from charlotte to long beach arriving after lunch time
show me all the available flights from baltimore to dallas with economy fares
i'd like a round trip ticket from los angeles to tacoma washington
i want a evening flight from dallas to milwaukee
what is the cheapest flight from pittsburgh to atlanta leaving on october fifth
what flights are there arriving in chicago after 9 pm on continental
all flights and fares from atlanta to dallas round trip after 12 pm less than 1100 dollars
which cities does united airlines service
round trip fares from denver to philadelphia under 1000 dollars
what flights does american airlines fly from philadelphia to dallas
display all flights from toronto to san diego on us air stopping over in denver
show me the flights from philadelphia to dallas with one stop
i would like to find a flight from kansas city to salt lake city on delta and arriving at about 8 o'clock in the evening could you please tell me the aircraft and the flight number thank you
i need a nonstop flight from san diego to phoenix
give me all the flights from new york to miami round trip
what is the fare from san francisco to dallas fort worth on delta flight 852
what kind of airplanes are used by delta airlines flying between washington and denver
what flights go from dallas to baltimore
show flights from dallas to oakland
shortest flight from boston to philadelphia
i need a flight from phoenix to detroit leaving monday evening
what airlines have flights from baltimore to seattle
tell me the last flight from atlanta to philadelphia
what flights from cincinnati to tampa
i want to travel from baltimore to washington on a monday
what airline is ea
philadelphia to san francisco next week tuesday show the flights
i would like information on flights from baltimore to atlanta on thursday arriving in atlanta before 6 pm
list all flights on continental from denver to chicago which depart after 934 pm
please give grounds transportation at dallas airport
hi i'd like a flight from tampa to montreal
the most expensive flight between boston and philadelphia
can you tell me the latest evening flight from atlanta to denver on july seventh
what flights from kansas city to chicago leave next wednesday returning the following day
show me flights leaving from san francisco to denver on september thirtieth
what is the latest flight in the day to arrive in boston from baltimore
show me flights from oakland to dallas on sunday
what flights are there on continental from seattle to chicago
i'd like a nonstop flight from indianapolis to san diego that serves dinner what's available
show me the airlines that fly from toronto to boston
list the flights that leave from philadelphia to atlanta early thursday morning before 8 am
are there any flights on june eleventh from st. petersburg to milwaukee
show me all flights from pittsburgh to baltimore which leave thursday after 3 o'clock pm
flights from baltimore denver and pittsburgh to philadelphia where the round trip fare for each is less than 1000 dollars
show flights from denver to oakland that arrive after 12 o'clock
show me the united flights from bwi to denver
i want to fly from boston to san francisco via dallas fort worth on american airlines
list all flights from memphis to seattle
show me flights from dallas to baltimore
show me all flights from pittsburgh to baltimore
philadelphia to dallas arriving before 1 in the afternoon
what flights stop in atlanta before noon
what do these cost
find a flight on american airlines from boston to san francisco that makes a stopover in denver
round trip fares from baltimore to philadelphia less than 1000 dollars or round trip fares from denver to philadelphia less than 1000 dollars or round trip fares from pittsburgh to philadelphia less than 1000 dollars
i want a flight on saturday from minneapolis to long beach
flights from nashville to orlando daily
are there any flights from denver to pittsburgh connecting in atlanta
show me the flights that go from san diego to newark new jersey
what are the flights available after 6 pm between san francisco and boston
i would like to book on delta airlines their earliest possible flight from washington dc to san francisco
show me all flights from pittsburgh to oakland that arrive after 10 am
okay and can you tell me for flights departing from dallas to philadelphia the latest flight you would have departing from dallas to philadelphia
flights from pittsburgh to newark
list the wednesday flights from denver to baltimore arriving in baltimore between 1115 am and 1245 pm
what is the fare for a one way flight from boston to atlanta
i'd like to fly round trip from boston to pittsburgh
what is airline nw
i want a return flight from washington to dallas on american airlines
is there ground transportation from the boston airport to downtown boston
list daily flights from atlanta to denver
i need a ticket from los angeles to charlotte that leaves early in the morning
does continental airlines fly from pittsburgh to atlanta
what are the delta flights from dallas to boston
all flights from cleveland to newark
what is hp
show me the flights from philadelphia to dallas that stop in atlanta
are there any nonstop flights from philadelphia to denver that arrive before 5 pm
from washington to atlanta
show me flights from dallas to atlanta
i'd like to go from boston to pittsburgh to find the cheapest flight
what flights from st. louis to st. paul on thursday leaving after 10 am
how many seats in a 72s
dallas to baltimore monday
what's the cheapest flight from denver to pittsburgh for both one way and round trip flights
how many airlines have flights with service class yn
what is the cheapest one way fare from any city to another
i need a flight from philadelphia to dallas that stops in atlanta
is there ground transportation in oakland
show me all the lufthansa flights between philadelphia and denver
what are the cheapest one way flights from denver to atlanta
show all connecting flights from pittsburgh to oakland
tell me about twa flight 539
which united airlines flights go through denver
i need to go from boston to atlanta and back in the same day find me the earliest flight from boston
i would like a flight from dallas to philadelphia
i would like the cheapest flight from pittsburgh to atlanta leaving april twenty fifth and returning may sixth
how much time does it take to go between the airport and downtown by ground transportation in dallas
which airlines have connections between pittsburgh and baltimore
please list the flights from kansas city to denver
i would like to make a reservation for a flight to denver from philadelphia on this coming sunday
i need an early flight from dallas to houston
what is the cheapest round trip flight from atlanta to pittsburgh
show me the flights from st. petersburg to toronto that leave monday
what does ord mean
what is the fare on november seventh going one way from pittsburgh to philadelphia
what are the first class fares from dallas to baltimore
what does nw stand for
ground transport in denver
show me the flights from pittsburgh to san francisco on friday
are there any flights between philadelphia and denver
round trip air fares from baltimore to philadelphia less than 1000 dollars
what is the cost of a first class ticket from dallas fort worth to san francisco
what flights depart newark for tampa on friday
ground transportation denver
i want a flight on continental airlines leaving san francisco california arriving pittsburgh pennsylvania
give me the latest northwest airlines flight from milwaukee to tacoma tomorrow
what is the first class fare for a round trip dallas to denver
i want to know the time of the latest flight i can take from washington to san francisco where i can get a dinner meal
show me all the cities that midwest express serves
i want a flight from atlanta to pittsburgh
list all flights going from boston to atlanta after 6 o'clock pm on wednesday
show me the flights from san francisco to boston
what's the name of the denver airport
show me the flights from san francisco to pittsburgh on tuesday
what are the morning flights from nashville to tacoma and from nashville to san jose in the next two days
what flights go from dallas to denver leaving after 3 pm
give me flights from pittsburgh to baltimore
please give me ground transportation information between dallas fort worth airport and downtown dallas
i need a flight from st. petersburg to charlotte which will get me into charlotte by 5 pm or as soon thereafter as possible
show me prices of flights from baltimore to dallas
cheapest fare from memphis to seattle
what are the cheapest one way flights from atlanta to denver
i'd like a twa flight from atlanta to pittsburgh with a stopover in fort worth dallas please
i need a first class ticket on united airlines from denver to baltimore scheduled for december seventeenth
show me flights from milwaukee to orlando on wednesday night
please list all delta flights from kansas city to salt lake city
what flights are there from denver to atlanta
show me the flights available from atlanta to baltimore leaving atlanta in the morning
give me a flight from baltimore to newark that arrives as early as possible
what flights leave from boston to pittsburgh in the morning
pittsburgh to denver
okay on tuesday june first i'd like to go from phoenix to detroit in the late afternoon
show me the ground transportation in denver
what flights go from dallas to tampa
what flights from kansas city to denver after 845 in the morning
show flights from cleveland to miami that arrive before 4 pm
find the flights leaving dallas and going to san francisco that leave after 5 pm
what are the coach fares for flights from charlotte to newark tuesday evening
tell me the flights from baltimore to dallas
which united flights from boston to san francisco make connections
instead of denver can i have the same flight from toronto to san diego but stopping in dallas fort worth
what're the lowest one way fares from denver to atlanta
what are the rental car rates in dallas
i would like a schedule of flights from denver to san francisco on tuesday
i want a flight from denver to pittsburgh then from pittsburgh to atlanta then from atlanta back to pittsburgh back to denver
i need a flight from pittsburgh to new york city
what flights go from boston to atlanta
what airlines fly from boston to atlanta
show me all flights for tomorrow from san francisco to pittsburgh
are there any later flights than 810 pm leaving from milwaukee for tacoma tomorrow evening
what are the flights between dallas and pittsburgh on july eight
what is the earliest flight leaving denver and arriving in baltimore on united airlines first class on july fourth
what northwest flights stop in denver
what flights from kansas city to atlanta arriving before 10 am on monday
show me the flights from pittsburgh to dallas
what is the lowest cost for a one way ticket from boston to washington
looking for a flight from denver to salt lake city
show me first class round trip flights from new york to miami i want the cheapest first class fare please
now i need another flight from las vegas to los angeles arriving also in the late afternoon what's available for that
return from miami to new york on tower air on saturdays
round trip fares from denver to philadelphia less than 1000 dollars
where is lester pearson airport
show me the flights from denver to westchester county
what is the fare on november seventh going one way from dallas to san francisco
what is the cheapest fare from dallas to denver on delta
show me the flights from baltimore to philadelphia
okay on monday may thirty first i'd like to go from san diego to phoenix early in the morning
what flights go from charlotte to baltimore in the morning
is there ground transportation available in denver
is ground transportation available in philadelphia
ground san francisco
please list all first class flights on united from denver to baltimore
can you show me fares for december sixteenth from oakland to dallas one way only
what times does continental depart from boston to san francisco
show me all flights from san francisco to oakland
first class from detroit to st. petersburg
can you rent a car at stapleton international airport in denver
list airlines serving between denver and san francisco
show me the first class flights from denver to baltimore
could i have a listing of flights leaving boston going to baltimore leaving wednesday after 2100
show me all flights from dallas to san francisco
i need to fly from dallas to san francisco and be in san francisco by 4 pm
i want to go and take a plane in atlanta and fly to boston
what is the most expensive one way fare from boston to atlanta on american airlines
show me the nonstop flights from dallas to houston
show me all flights from phoenix to milwaukee on american airlines on wednesday
i would like an afternoon flight from washington to boston on august twentieth
do you have any direct flights from pittsburgh to atlanta
list all flights from boston to san francisco on us air
show me the flights from atlanta to denver on monday
show flights from pittsburgh into san francisco arriving after 12 noon
i would like a list of the round trip flights between indianapolis and orlando on the twenty seventh or the twenty eighth of december
i would like information on flights from dallas to atlanta arriving in atlanta on tuesday morning
what is the seating capacity of a boeing 767
what is fare code m
what are the classes of service on lufthansa
what flights are from memphis to las vegas
i want to go from denver to atlanta round trip and make a stop at pittsburgh is this possible
what ground transportation is available in san francisco
i want to leave before 8 in the morning what flight should i take to atlanta from boston
which flight between pittsburgh and baltimore on july nineteenth has the smallest seating capacity
eastern flies from atlanta to denver what type of aircraft do you use before 6 pm
give me a flight from new york city to las vegas and a flight from memphis to las vegas that arrive at the same time
is there a flight on american airlines from boston to denver
information on ground transportation in denver
list the northwest airlines flights that leave denver before noon
i'd like to fly from dallas to san francisco at approximately 615 pm
i would like a flight from boston to denver on monday
what's the first flight after 1 pm leaving washington to denver
what are the nonstop flights on america west or southwest air from kansas city to burbank on saturday may twenty two
tell me about ground transportation between orlando international and orlando
i'd like a twa flight from las vegas to new york nonstop
is there a delta flight from denver to san francisco
