# Supplementary material
Source: ML conference proceedings conference paper supplement (https://aclanthology.org/P19-1544)
Supplement: Supplementary [file P19-1544.Supplementary.zip › SF-ID-network/data/atis/valid/seq.in]

i want to fly from boston at 838 am and arrive in denver at 1110 in the morning
show me all round trip flights between houston and las vegas
i would like some information on a flight from denver to san francisco on united airlines
what are the coach flights between dallas and baltimore leaving august tenth and returning august twelve
i'm flying from boston to the bay area
okay can you tell me the flight cost between denver and atlanta
from montreal to las vegas
what is the earliest breakfast flight from philadelphia to fort worth
flights from pittsburgh to baltimore between 10 am and 2 pm
what is the latest flight departing from boston to san francisco
flights from ontario to florida
i would like to know the first class fare on a flight from baltimore to denver
okay that sounds great let's go from atlanta on april twenty one in the morning to dallas least expensive fare one way
show me the prices of all flights from atlanta to washington dc
flights from cincinnati to o'hare departing after 718 am american
i'm interested in a flight from pittsburgh to atlanta
i am interested in booking an early morning flight from dallas into houston on february twenty second and returning late in the evening of february twenty second
i'm looking for a flight from oakland to denver with a stopover in dallas fort worth
what's restriction ap68
what types of ground transportation are available in philadelphia
what does the abbreviation co mean
a first class flight on american to san francisco on the coming tuesday
please list the flights from baltimore to san francisco on fridays
what flights return from denver to philadelphia on a saturday
on united airlines flying from denver to san francisco before 10 am what type of aircraft is used
i need a flight from atlanta to baltimore nonstop arriving at 7 pm please
what are the cheapest round trip flights from denver to atlanta
does continental fly from denver to san francisco
i would like a nonstop flight from st. petersburg to charlotte leaving in the afternoon
on continental airlines any class service from san francisco to pittsburgh
find me the cheapest flight from boston to washington
well i'll try last time tell me the kind of aircraft united airlines flies from denver to san francisco before 10 o'clock in the morning
show me the northwest flights from detroit to st. petersburg
morning flights from pittsburgh to atlanta on wednesday
show me flights first class from san francisco to pittsburgh leaving on tuesday after 8 o'clock in the morning and before 12 noon
what's the most expensive way i can fly to washington
show me the cheapest one way fare from baltimore to dallas
flights from boston flights from philadelphia to boston on monday
list nonstop flights from houston to dallas which arrive before midnight
i need a flight to seattle leaving from baltimore making a stop in minneapolis
philadelphia to san francisco please
airline that stands for dl
i'd like a cheap flight from dallas to baltimore on january first
what flights are available friday from san francisco to boston
show me saturday and sunday's flights from milwaukee to phoenix on american airlines
what flights from st. paul to kansas city on friday with lunch served
what flights from toronto to philadelphia
what flights leave from atlanta to boston on june twenty ninth in the afternoon
what flights leave la guardia for san jose and arrive 10 pm
list the total number of flights to all airports by delta
can you tell me the time a flight would leave from atlanta to boston in the afternoon
show me the united airlines flights from denver to baltimore leaving on june fourteenth
please list all flights from dallas to philadelphia on monday
show me the flights from cleveland to memphis
please give me flights from atlanta to boston on wednesday and thursday
show me ground transportation in philadelphia on monday morning
what delta leaves boston for atlanta
find me the earliest boston departure and the latest atlanta return trip so that i can be on the ground the maximum amount of time in atlanta and return to boston on the same day
show me flights from boston to washington leaving july fifteen
i would like the time of your earliest flight in the morning from philadelphia to washington on american airlines
show me the flights from baltimore to boston
please list the flight schedule from baltimore to san francisco on friday nights
how long is a trip from philadelphia airport to downtown philadelphia
sure i'd like to determine what aircraft are use on july seventh leaving from boston and arriving in atlanta on july seventh
baltimore to philadelphia
what are the flights and fares from atlanta to philadelphia
united airlines flights stopping in denver
what flights are available wednesday afternoon from denver to san francisco
round trip fares from denver to philadelphia less than 1000 dollars
list the first class flights from baltimore to denver
what are the fares from newark to la monday and wednesday
what flights from chicago to kansas city
please show me flights from dallas to atlanta on monday
flights to baltimore
show me the latest flight to love field
how many of delta's night flights are first class
on united airlines give me the flight times from boston to dallas
show me the ground transportation schedule in philadelphia in the morning on wednesday
what is the last flight from boston to atlanta
what flights fly from denver to san francisco on monday tuesday wednesday thursday and friday
show me the flights from boston to philadelphia
i also need to go to san francisco on wednesday evening from dallas
from kansas city to salt lake city on delta arrive around 8 pm tomorrow
in new york i'll need to rent a car
show me flights from denver to boston on thursday
i would like to book a flight from charlotte to baltimore on april eighth
flights from oakland to san francisco on january twenty first 1992
how much is a limousine between dallas fort worth international airport and dallas
is there a flight from boston to san francisco making a stopover in dallas fort worth
what time are the flights from baltimore to san francisco
from las vegas to phoenix departing in the morning
how many passengers can a boeing 737 hold
i would like a flight that leaves on friday from philadelphia to dallas that makes a stop in atlanta
thank you for that information now i would like information on a flight on april sixteen from atlanta to philadelphia early in the morning
what time is the last flight from washington to san francisco
show me the least expensive flight leaving miami on sunday after 12 o'clock noon and arriving cleveland
what do you have tomorrow morning from pittsburgh to atlanta
how much is the cheapest flight from denver to pittsburgh
what is the cheapest one way fare from pittsburgh to atlanta traveling on tuesday august twentieth
show me the flights from denver to san diego leaving after 5 pm
what is the latest first class flight of the day leaving dallas for san francisco
show me a list of flights from pittsburgh to baltimore on august third
show morning flights from san francisco to pittsburgh
what are the flights from memphis to tacoma
can you list all nonstop flights between st. petersburg and charlotte that leave in the afternoon and arrive soon after 5 pm
show me all united flights from denver to san francisco for september first 1991
are there wednesday morning flights between pittsburgh and boston
list all american airlines from milwaukee to phoenix on saturday
give me the flights on december twenty seventh with the fares from indianapolis to orlando
okay all right do you have a flight on united airlines from atlanta to washington
show flights from denver to oakland arriving between 12 and 1 o'clock
list all nonstop flights on sunday from tampa to charlotte
i would like to make a one way flight from boston to atlanta
is there a flight in the afternoon from philadelphia that arrives in the evening in denver
what is the first flight from atlanta to baltimore that serves lunch
list list flights between oakland and denver
please give me a flight from boston to atlanta before 10 am in the morning
list the nonstop flights early tuesday morning from dallas to atlanta
what's the lowest round trip fare from denver to pittsburgh
please arrange a flight for me from denver to san francisco on us air
i would like to see information for flights from san francisco leaving after 12 pm to pittsburgh on monday
show me the cheapest flight from pittsburgh to atlanta on wednesday which leaves before noon and serves breakfast
what is the earliest flight from washington to san francisco
list flights from pittsburgh to los angeles which leave on thursday after 5 pm
list the flights from new york to miami on a tuesday which are nonstop and cost less than 466 dollars
list flights from denver to san francisco no denver to philadelphia
i need to find a plane from boston to san francisco on friday
what does lax stand for
show prices for all flights from baltimore to dallas on july twenty ninth
what flights are available from boston to washington late monday evening or early tuesday morning
what flights from washington dc to toronto
all flights from boston to washington dc on november eleventh before 10 am
list all flights from denver to philadelphia
i need a list of late afternoon flights from st. louis to chicago
show me the airlines for flights to or from love field
do you have any flights from chicago to indianapolis
what does yn stand for
shortest flights from nashville to st. petersburg
what are the fares for flights between atlanta and dfw
list the fares of midway airlines flights from boston to philadelphia
round trip fares from denver to philadelphia less than 1000 dollars
is there a continental flight leaving from las vegas to new york nonstop
i need the cost of a ticket going from denver to baltimore a first class ticket on united airlines
show me fares from philadelphia to san francisco on thursday morning
show me the round trip flights between phoenix and salt lake city
show me all the flights from denver to baltimore arriving may tenth
find the cheapest one way fare from boston to san francisco
show me the flights from boston to san francisco
please show me the flights from boston to san francisco
show me the airlines from love field
show business class fares on us air from boston to toronto
what is the latest flight leaving las vegas for ontario
flights from las vegas to phoenix
does flight ua 270 from denver to philadelphia have a meal
what nonstop flights are available from oakland to philadelphia arriving between 5 and 6 pm
give me the flights for american airline from philadelphia to dallas
show me the evening flights from atlanta to washington on wednesdays
i would like a coach class seat on a flight leaving denver arriving atlanta
can you list all the flights between phoenix and las vegas
show me the qx fare flights between atlanta and oakland on delta airlines
what afternoon flights are available between denver and dallas fort worth
fares and flights from pittsburgh to philadelphia
can you tell me what airline flies between denver and san francisco
how many flights does each airline have with booking class k
great now what i want to find out is on april twentieth from washington to denver do you have a flight least expensive fare around 5 o'clock in the morning
show me all direct flights from san francisco to boston departing before noon
i need a flight on thursday before 8 am from oakland to salt lake city
show me all the types of aircraft
i want a flight on continental from boston to san francisco
show flights from pittsburgh into san francisco
what city is mco
how many cities are served by american airline with first class flights
could you please show me all flights from charlotte to milwaukee
what flights depart san francisco after 4 pm and fly to washington via indianapolis
i would like to see the flights from denver to philadelphia
show me the flights that go from san diego to newark new jersey by way of houston
i would like information on flights from denver to san francisco after noon on wednesday
show me the flights from boston to pittsburgh
show me all flights from san diego to new york nonstop
show me the round trip tickets from baltimore to atlanta
show me the cheapest one way fares from san diego to miami
could you show me all weekday flights from phoenix to denver
i would like to fly from boston to philadelphia next thursday
i'm planning a trip to pittsburgh and i live in denver can you help me
i would like to find the least expensive flight from boston to denver
i would like to go from atlanta to denver on tuesday
atlanta to pittsburgh july twenty third
show me the flights from boston to atlanta
what airlines fly from burbank to denver
okay we're going from washington to denver first class ticket i'd like to know the cost of a first class ticket
i wish to book a flight from pittsburgh to atlanta coach discount fare
is it possible for me to fly from baltimore to san francisco
i want to fly from denver to san francisco with at least one stop
how many us air flights leave from washington
please list any flight available leaving oakland california tuesday arriving philadelphia wednesday
i'd like to find a flight from las vegas to detroit michigan that leaves in the afternoon on monday
are there any flights from denver to pittsburgh with stops in atlanta
i'd like to know the information from boston to philadelphia nonstop
show me all flights from denver to philadelphia on saturday after sunday which leave after noon
what are the flights from dallas to baltimore
do you have a flight from san francisco to atlanta around 8 am
what flights from seattle to salt lake city
what is the cheapest flight from boston to bwi
are there any flights from new york to los angeles which stop over in milwaukee
what is the earliest flight from oakland to washington dc on sunday
are there any turboprop flights from pittsburgh to baltimore on december seventeenth
show me the morning flights from boston to philadelphia
newark to cleveland daily
evening flights from philadelphia to oakland
show me prices and times for first class travel from baltimore to dallas next summer
what kind of plane flies from boston to pittsburgh after noon
i'd like to know what flights united airline has from dallas to san francisco
show me morning flights from toronto
what ground transportation is available at the boston airport
where do the flights from boston to oakland stop
show me the earliest flight from boston to san francisco
flights from la guardia or jfk to cleveland
find the cheapest one way fare from boston to san francisco
what are the flights from washington dc to denver
give me information on flights from atlanta to washington dc on wednesday after 4 pm and thursday before 9 am
flights between baltimore and washington dc
what fare codes cover flights from philadelphia to san francisco
are there any flights from boston to oakland that stop
list departure times from denver to philadelphia which are later than 10 o'clock and earlier than 2 pm
are there any airlines that have flights from boston to philadelphia that leave before 630 am
how many first class flights does united have today
please show me the flights available from san francisco to pittsburgh on tuesday
i'm in miami and i'd like to travel to las vegas on sunday
show me flights from denver to philadelphia
i would like to fly from pittsburgh to atlanta on us air at the latest time possible in the evening
show me all flights from dallas to pittsburgh which leave on monday after 8 o'clock am
are there any nonstop flights leaving from denver arriving in baltimore on july seventh
list round trip flights between boston and oakland using twa
what are the sunday flights from oakland to washington dc
what flights are there on sunday from seattle to minneapolis
what flights from las vegas to montreal on saturday
what is the fare on continental 271 from dallas to san francisco
show me flights denver to washington dc on thursday
what type of ground transportation is available at philadelphia airport
flights from phoenix to milwaukee on wednesday evening
show me the last flight from love field
can you list all flights that depart from orlando to kansas city
i want to fly from kansas city to chicago next wednesday arriving in the evening and returning the next day
what is the ground transportation available in the city of fort worth
i need a flight from baltimore to seattle that stops in minneapolis
what is the latest flight you have departing dallas to philadelphia
show me the flights from atlanta to philadelphia
show me the flights arriving at love field from other airports
what does ewr stand for
what flights from denver to salt lake city
please give me the flight times the morning on united airlines for september twentieth from philadelphia to san francisco
what is the earliest arrival in salt lake city of a flight from toronto
i'd like to see all the flights from boston to philadelphia
what is fare code c
what kind of aircraft does delta fly before 8 am on august second from boston to denver
flight from denver to san francisco in the afternoon
what is the first flight from boston to stapleton airport for tomorrow
i need to know what flights leave atlanta on sunday evening and arrive in baltimore
what are the flights from milwaukee to orlando on wednesday
what is the cheapest fare between denver and boston
what airlines have business class
i need a flight from san francisco to pittsburgh and then pittsburgh to new york and new york to san francisco
what flights are there between washington dc and san francisco leaving washington after 6 pm on wednesday
what type of aircraft does eastern fly from atlanta to denver before 6 pm
i would like the flights available from boston to denver arriving in denver on 9 o'clock wednesday morning on or by 9 o'clock wednesday morning
what ground transportation is available at the baltimore airport
show me flights from atlanta to baltimore denver and dallas
what flights are there from minneapolis to chicago
flights from denver to pittsburgh on thursday
may i have a list of flights going from boston to denver on the twenty ninth of july
what flights are there between nashville and st. louis which are nonstop and arrive after noon and before 8 pm
please list the flight times for boston to pittsburgh
flight leaving from oakland to salt lake city
what are the different classes that an airline offers
could you tell me if there is ground transportation between the boston airport and boston downtown
ground transportation denver
what are the prices of the flights from atlanta to dallas in the morning
how long does it take to fly from boston to atlanta
please list the friday afternoon flights from san jose to dallas on american airlines
is there an american airlines flight in the evening from dallas to san francisco
what ground transportation is available in denver
show me the fares from dallas to san francisco
in pittsburgh i'd like to rent a car
i would like to find a flight that goes from tampa to montreal making a stop in new york and a flight that serves lunch
please give me flights from atlanta to boston on wednesday afternoon and thursday morning
can you list all flights leaving from st. louis and arriving in milwaukee
flights from montreal to las vegas
give me the flights from chicago to seattle on saturday morning
what is airline nw
i need a flight tonight from charlotte to las vegas with a stop in st. louis and i want dinner
what's the latest flight out of denver that arrives in pittsburgh next monday
please list the flights taking off and landing on general mitchell international airport
what limousine service is in boston
what is fare code y mean
are there delta flights leaving denver
on thursday i'd like a flight from st. petersburg to miami
when do planes leave boston for
what flights are there wednesday morning from atlanta to philadelphia
show me all flights from san francisco to boston philadelphia or baltimore
what type of aircraft is used on the first flight from philadelphia to dallas in the morning
what are the flights from pittsburgh to oakland
list the morning flights at a 124 dollars from atlanta to boston
all flights from miami to new york
show flights from denver to oakland
show flights from philadelphia to san francisco
i'd like a flight tomorrow late from nashville to houston with dinner please
show me all prices of economy from baltimore to dallas
i need a flight from montreal quebec to san diego california leaving this sunday
show me the cheapest one way flight from san francisco to boston leaving san francisco after 9 pm
does united airlines have flights between boston and denver
i would like to fly us air from orlando to cleveland in the late evening what do you have available
what are the flights from milwaukee to orlando on wednesday night
show me the flights from newark to los angeles
can you give me the evening flight on wednesday from washington to atlanta again
what are the flights and prices from la to charlotte for monday morning
what first class flights are available on july twenty fifth 1991 from denver to baltimore
show me all flights from pittsburgh to baltimore tomorrow which serve a meal
show me all the flights between philadelphia and denver
flights from phoenix to newark
all flights from pittsburgh to dallas round trip after 12 pm less than 100
thanks and what's the last flight back from washington to boston
show me the flights from boston to baltimore
what does fare code q mean
show me the flights arriving in baltimore from philadelphia at about 4 o'clock
what is the cheapest fare from baltimore to dallas in any class
give me all nonstops from new york to vegas that arrive on a sunday
what is sa
show me the flights from boston to san francisco
what does fare code qo mean
i need information on flights leaving dallas arriving in boston leaving dallas early in the morning
what is the earliest flight on thursday from atlanta to washington dc
what flights are available saturday to san francisco from dallas
i'd like to fly from boston to san francisco
how many flights does american airlines have from boston to atlanta
does midwest express have any flights from montreal to nashville
show me all economy prices from dallas to baltimore
and how much does it cost to travel from boston airport to downtown
all flights before 10 am boston denver
show me the flights that go from san diego to newark with one stop in houston
show me the earliest flight on wednesday from baltimore to newark
i'd like to book the cheapest one way flight from pittsburgh to atlanta on july twentieth
what does mco mean
show me all the flights from charlotte to cleveland
do you have a flight from salt lake city to st. petersburg
what is the earliest flight from boston to atlanta
i'd like a flight tomorrow from kansas city to newark in the morning
show me all flights from boston to detroit
show me the flights arriving in baltimore on june fifteenth leaving either from denver or dallas
show me the flights from love field to other airports
what is the earliest flight i can get from baltimore to boston
what is the round trip thrift fare on us air from boston to san francisco
show me flights from los angeles to pittsburgh on monday evening
i would like a flight from atlanta to denver
give me all the flights from memphis to charlotte
from philadelphia to toronto
newark to cleveland
list all american airline flights which leave phoenix on wednesday and stop at milwaukee
show me all flights from pittsburgh to baltimore tomorrow
is there a direct flight from denver to pittsburgh in the morning of august thirty first that is nonstop
which airline offers the cheapest rate going from dallas to baltimore on july fourth
does midwest express serve charlotte
show me all the flights from philadelphia to san francisco
ground transportation in denver
show me all flights from boston to dallas fort worth both direct and connecting that arrive before noon
show flights from philadelphia to dallas on saturday
and flights leaving from atlanta to oakland leaving after 5 pm
okay and on may four i would like to go from atlanta to denver leaving early in the morning around 8
all flights from boston to washington dc on november eleventh
what are the early morning flights from boston to denver
what is the cheapest flight from denver to pittsburgh leaving on september twenty eighth
flight from dallas to oakland california on monday
i would like to fly from dallas to san francisco on saturday and arrive in san francisco before 4 pm
morning flights out of san francisco arriving boston afternoon
i'd like to see flights from baltimore to atlanta that arrive before noon
find me the earliest boston departure for atlanta and the lastest return trip from atlanta so that i can be in atlanta the longest amount of time but return to boston the same day
please give me the cheapest round trip airfare from atlanta to philadelphia on august the first
i would like information on flights from philadelphia to oakland california on friday afternoon
what afternoon flights are available from pittsburgh to atlanta on a weekday
show ground transportation in denver
please show me airlines with flights from denver to boston with stop in philadelphia
dallas to baltimore
rental cars in washington dc
does american airlines fly to san francisco from atlanta
kindly give me the type of aircraft used to fly from atlanta to denver
give me flights from denver to baltimore
what is fare class h
what is the earliest flight from washington to san francisco on friday that serves breakfast
what flights are there from atlanta to washington early on thursday mornings
what kind of ground transportation is there in dallas
could i have a list of flights in first class on monday from san francisco to pittsburgh starting at noon and afterwards
how much is a us air boston to pittsburgh daily nonstop flight
i'd like to go from boston to atlanta sometime after 5 pm can you tell me the flights that could do that for me
what's fare code yn
airports in new york
i'd like to arrange for two friends to fly into los angeles next saturday evening one of the people is coming from kansas city and the other is coming from las vegas
show me all overnight flights from washington dc to san francisco and list their fares
what ground transportation is there in atlanta
flights from pittsburgh to baltimore arriving between 4 and 5 pm
what does fare code qw mean
show flights from new york city to las vegas
i need information for ground transportation denver colorado
list the flight from philadelphia to san francisco on american airlines
show me the airlines for flights to or from love field
list nonstop flights from san francisco to oakland that depart in the afternoon
which airline serves denver pittsburgh and atlanta
how many first class flights does delta airlines have
please show flights arriving in philadelphia from denver
now show me the flights from pittsburgh to baltimore
show me flights from milwaukee to orlando on wednesday night or thursday morning
i would like to fly delta airlines from atlanta to pittsburgh
what is fare code f
what are the flights for united airlines on september twentieth in the morning
show all airlines with flights between denver and dallas
cheapest fare from nashville to seattle
how many flights does american airlines have with a class of service code f
find a nonstop flight between boston and washington arriving in washington around 5 pm
pittsburgh to baltimore please on january one
show me the costs and times for flights from san francisco to atlanta
what airlines fly from boston to denver
what ground transportation is there in atlanta
how far from the airport in the dallas fort worth airport is dallas
list all flights from tampa florida to miami that are the cheapest one way
show me the flights from philadelphia to baltimore
ground transportation in denver
please list all flights from atlanta to baltimore on wednesday and thursday
does flight dl 1083 from philadelphia to denver fly on saturdays
i would like to book a flight going from tampa to seattle on may twenty sixth i would like to stop in milwaukee on the way
i want to fly from boston to atlanta i would like the cheapest fare please
show me the flights from montreal to philly
what flights are available sunday afternoon from oakland to dallas
explain the restriction ap 80
i want to go from baltimore to san francisco with a stopover in denver
information on a flight from san francisco to philadelphia
shortest morning flights from cincinnati to tampa
what are the flights from boston to washington on october fifteenth 1991
what flights are there on wednesday evening from denver to sfo
show me a list of flights on american airlines from boston to dc on july twenty second
us air 269 leaving boston at 428 what is the arrival time in baltimore
i would like information on flights leaving early monday morning from atlanta to baltimore
now show me the flights from memphis to cleveland
what flights leave from nashville to phoenix
show me the air fare for the flights from baltimore to dallas
what are the flights from denver to san francisco
which airlines go from san francisco to washington by way of indianapolis
all flights from washington dc to san francisco on november twelfth
round trip fares from pittsburgh to philadelphia under 1000 dollars
show nonstop flights from new york to miami on a tuesday which cost less than 466 dollars one way
i'd like flights on american airlines from philadelphia to dallas arriving before 1145 am
show business class fares from san francisco to denver on united airlines
what is the earliest flight between logan and bwi
describe pittsburgh airport
show flights on us air from pittsburgh to oakland connecting through denver
list all nonstop flights on tuesday before noon from charlotte to baltimore
minneapolis to phoenix on monday
please list me the flights and their cost of all airlines flying from denver to baltimore
what airline uses the code hp
find a flight from san francisco to boston on wednesday
could you tell me about ground transportation arrangements from the dallas airport to downtown dallas
display all flights from pittsburgh to san francisco on august second
give me morning flights from charlotte to baltimore
anything from baltimore or washington with a stopover in denver going to san francisco
show me flights from boston to denver
show me the flights from columbus to charlotte
i need a flight from new york city to montreal thursday may six
philadelphia to san francisco
what is the earliest flight from boston to san francisco
is there a limousine service available from the pittsburgh airport
boston ground transportation
the earliest flight from boston to san francisco please that will be serving a meal
what does code qw mean
what airline is hp
what are the costs of car rental in dallas
show me the flights leaving saturday or sunday from milwaukee to phoenix
i'm interested in a flight from pittsburgh to atlanta
flights from kansas city to cleveland on wednesday
is there a nonstop flight from denver to san francisco
display all flights from san francisco to boston on august eighth
which airlines have flights between philadelphia and pittsburgh
i want to go from boston to atlanta on monday
what is the next flight from pittsburgh to san francisco after delta flight 1059
show me the least expensive flight from miami to cleveland on sunday after noon
what type of aircraft is used flying from atlanta to denver before 12 noon
show me all flights from boston to atlanta which leave atlanta after noon tomorrow
how much does it cost to rent a car in tacoma
what kind of airplane is flight ua 270 from denver to philadelphia
list all flights from boston to atlanta before 5 o'clock am on thursday
i'd like the earliest flight from dallas to boston
show me the flights on delta from atlanta in the morning
what flights from salt lake city to las vegas
show me the list of flights between philadelphia and denver that leave in the afternoon
what is the fare from atlanta to boston on coach one way
how many fares are there one way from tacoma to montreal
i would like to know some information on flights leaving philadelphia arriving in pittsburgh in the afternoon
what flights are available from pittsburgh to boston on wednesday of next week
is there a flight on continental airlines from boston to denver
pm flights dallas to atlanta
information on flights from baltimore to philadelphia
what flights from atlanta to st. louis on tuesday arriving around 230 pm
show me ground transportation in san francisco
what flights do you have from newark new jersey to ontario california that connect in phoenix
