# Supplementary material
Source: ML conference proceedings conference paper supplement (https://aclanthology.org/P19-1544)
Supplement: Supplementary [file P19-1544.Supplementary.zip › SF-ID-network/data/atis/valid/seq.out]

O O O O O B-fromloc.city_name O B-depart_time.time I-depart_time.time O O O B-toloc.city_name O B-arrive_time.time O O B-arrive_time.period_of_day
O O O B-round_trip I-round_trip O O B-fromloc.city_name O B-toloc.city_name I-toloc.city_name
O O O O O O O O O B-fromloc.city_name O B-toloc.city_name I-toloc.city_name O B-airline_name I-airline_name
O O O B-class_type O O B-fromloc.city_name O B-toloc.city_name O B-depart_date.month_name B-depart_date.day_number O O B-return_date.month_name B-return_date.day_number
O O O B-fromloc.city_name O O B-toloc.city_name I-toloc.city_name
O O O O O O O O O B-fromloc.city_name O B-toloc.city_name
O B-fromloc.city_name O B-toloc.city_name I-toloc.city_name
O O O B-flight_mod B-meal_description O O B-fromloc.city_name O B-toloc.city_name I-toloc.city_name
O O B-fromloc.city_name O B-toloc.city_name O B-depart_time.start_time I-depart_time.start_time O B-depart_time.end_time I-depart_time.end_time
O O O B-flight_mod O O O B-fromloc.city_name O B-toloc.city_name I-toloc.city_name
O O B-fromloc.city_name O B-toloc.state_name
O O O O O O B-class_type I-class_type O O O O O B-fromloc.city_name O B-toloc.city_name
O O O O O O O B-fromloc.city_name O B-depart_date.month_name B-depart_date.day_number I-depart_date.day_number O O B-depart_time.period_of_day O B-toloc.city_name B-cost_relative I-cost_relative O B-round_trip I-round_trip
O O O O O O O O B-fromloc.city_name O B-toloc.city_name B-toloc.state_code
O O B-fromloc.city_name O B-toloc.airport_name O B-depart_time.time_relative B-depart_time.time I-depart_time.time B-airline_name
O O O O O O B-fromloc.city_name O B-toloc.city_name
O B-depart_time.period_of_day O O O O B-depart_time.period_of_day B-depart_time.period_of_day O O B-fromloc.city_name O B-toloc.city_name O B-depart_date.month_name B-depart_date.day_number I-depart_date.day_number O O O O O B-return_time.period_of_day O B-return_date.month_name B-return_date.day_number I-return_date.day_number
O O O O O O B-fromloc.city_name O B-toloc.city_name O O O O B-stoploc.city_name I-stoploc.city_name I-stoploc.city_name
O O B-restriction_code
O O O O O O O O B-city_name
O O O O B-airline_code O
O B-class_type I-class_type O O B-airline_name O B-toloc.city_name I-toloc.city_name O O B-depart_date.date_relative B-depart_date.day_name
O O O O O B-fromloc.city_name O B-toloc.city_name I-toloc.city_name O B-depart_date.day_name
O O O O B-fromloc.city_name O B-toloc.city_name O O B-depart_date.day_name
O B-airline_name I-airline_name O O B-fromloc.city_name O B-toloc.city_name I-toloc.city_name B-depart_time.time_relative B-depart_time.time I-depart_time.time O O O O O O
O O O O O B-fromloc.city_name O B-toloc.city_name B-flight_stop O O B-arrive_time.time I-arrive_time.time O
O O O B-cost_relative B-round_trip I-round_trip O O B-fromloc.city_name O B-toloc.city_name
O B-airline_name O O B-fromloc.city_name O B-toloc.city_name I-toloc.city_name
O O O O B-flight_stop O O B-fromloc.city_name I-fromloc.city_name O B-toloc.city_name O O O B-arrive_time.period_of_day
O B-airline_name I-airline_name O O O O B-fromloc.city_name I-fromloc.city_name O B-toloc.city_name
O O O B-cost_relative O O B-fromloc.city_name O B-toloc.city_name
O O O O O O O O O O O B-airline_name I-airline_name O O B-fromloc.city_name O B-toloc.city_name I-toloc.city_name B-depart_time.time_relative B-depart_time.time I-depart_time.time O O B-depart_time.period_of_day
O O O B-airline_name O O B-fromloc.city_name O B-toloc.city_name I-toloc.city_name
B-depart_time.period_of_day O O B-fromloc.city_name O B-toloc.city_name O B-depart_date.day_name
O O O B-class_type I-class_type O B-fromloc.city_name I-fromloc.city_name O B-toloc.city_name O O B-depart_date.day_name B-depart_time.time_relative B-depart_time.time I-depart_time.time O O B-depart_time.period_of_day O B-depart_time.time_relative B-depart_time.time I-depart_time.time
O O B-cost_relative I-cost_relative O O O O O B-toloc.city_name
O O O B-cost_relative B-round_trip I-round_trip O O B-fromloc.city_name O B-toloc.city_name
O O B-fromloc.city_name O O B-fromloc.city_name O B-toloc.city_name O B-depart_date.day_name
O B-flight_stop O O B-fromloc.city_name O B-toloc.city_name O O B-arrive_time.time_relative B-arrive_time.period_of_day
O O O O O B-toloc.city_name O O B-fromloc.city_name O O O O B-stoploc.city_name
B-fromloc.city_name O B-toloc.city_name I-toloc.city_name O
O O O O B-airline_code
O O O B-flight_mod O O B-fromloc.city_name O B-toloc.city_name O B-depart_date.month_name B-depart_date.day_number
O O O O B-depart_date.day_name O B-fromloc.city_name I-fromloc.city_name O B-toloc.city_name
O O B-depart_date.day_name O B-depart_date.day_name O O B-fromloc.city_name O B-toloc.city_name O B-airline_name I-airline_name
O O O B-fromloc.city_name I-fromloc.city_name O B-toloc.city_name I-toloc.city_name O B-depart_date.day_name O B-meal_description O
O O O B-fromloc.city_name O B-toloc.city_name
O O O O B-fromloc.city_name O B-toloc.city_name O B-depart_date.month_name B-depart_date.day_number I-depart_date.day_number O O B-depart_time.period_of_day
O O O B-fromloc.airport_name I-fromloc.airport_name O B-toloc.city_name I-toloc.city_name O O B-arrive_time.time I-arrive_time.time
O O O O O O O O O O B-airline_name
O O O O O B-flight_time O O O O O B-fromloc.city_name O B-toloc.city_name O O B-depart_time.period_of_day
O O O B-airline_name I-airline_name O O B-fromloc.city_name O B-toloc.city_name O O B-depart_date.month_name B-depart_date.day_number
O O O O O B-fromloc.city_name O B-toloc.city_name O B-depart_date.day_name
O O O O O B-fromloc.city_name O B-toloc.city_name
O O O O O B-fromloc.city_name O B-toloc.city_name O B-depart_date.day_name O B-depart_date.day_name
O O O O O B-city_name O B-day_name B-period_of_day
O B-airline_name O B-fromloc.city_name O B-toloc.city_name
O O O B-flight_mod B-fromloc.city_name O O O B-flight_mod B-fromloc.city_name O O O O O O O O O O O O O O O O B-toloc.city_name O O O B-toloc.city_name O O O B-return_date.date_relative
O O O O B-fromloc.city_name O B-toloc.city_name O B-depart_date.month_name B-depart_date.day_number
O O O O B-flight_time O O B-flight_mod O O O B-depart_time.period_of_day O B-fromloc.city_name O B-toloc.city_name O B-airline_name I-airline_name
O O O O O B-fromloc.city_name O B-toloc.city_name
O O O B-flight_time I-flight_time O B-fromloc.city_name O B-toloc.city_name I-toloc.city_name O B-depart_date.day_name B-depart_time.period_of_day
O O O O O O B-fromloc.airport_name I-fromloc.airport_name O O B-toloc.city_name
O O O O O O O O O O B-depart_date.month_name B-depart_date.day_number O O B-fromloc.city_name O O O B-toloc.city_name O B-arrive_date.month_name B-arrive_date.day_number
B-fromloc.city_name O B-toloc.city_name
O O O O O O O B-fromloc.city_name O B-toloc.city_name
B-airline_name I-airline_name O O O B-stoploc.city_name
O O O O B-depart_date.day_name B-depart_time.period_of_day O B-fromloc.city_name O B-toloc.city_name I-toloc.city_name
B-round_trip I-round_trip O O B-fromloc.city_name O B-toloc.city_name B-cost_relative O B-fare_amount I-fare_amount
O O B-class_type I-class_type O O B-fromloc.city_name O B-toloc.city_name
O O O O O B-fromloc.city_name O B-toloc.city_name B-depart_date.day_name O B-depart_date.day_name
O O O B-fromloc.city_name O B-toloc.city_name I-toloc.city_name
O O O O O B-fromloc.city_name O B-toloc.city_name O B-depart_date.day_name
O O B-toloc.city_name
O O O B-flight_mod O O B-toloc.airport_name I-toloc.airport_name
O O O B-airline_name B-depart_time.period_of_day O O B-class_type I-class_type
O B-airline_name I-airline_name O O O B-flight_time I-flight_time O B-fromloc.city_name O B-toloc.city_name
O O O O O O O B-city_name O O B-period_of_day O B-day_name
O O O B-flight_mod O O B-fromloc.city_name O B-toloc.city_name
O O O O B-fromloc.city_name O B-toloc.city_name I-toloc.city_name O B-depart_date.day_name B-depart_date.day_name B-depart_date.day_name B-depart_date.day_name O B-depart_date.day_name
O O O O O B-fromloc.city_name O B-toloc.city_name
O O O O O O B-toloc.city_name I-toloc.city_name O B-depart_date.day_name B-depart_time.period_of_day O B-fromloc.city_name
O B-fromloc.city_name I-fromloc.city_name O B-toloc.city_name I-toloc.city_name I-toloc.city_name O B-airline_name O B-arrive_time.time_relative B-arrive_time.time I-arrive_time.time B-arrive_date.today_relative
O B-city_name I-city_name O O O O O B-transport_type
O O O O B-fromloc.city_name O B-toloc.city_name O B-depart_date.day_name
O O O O O O O O B-fromloc.city_name O B-toloc.city_name O B-depart_date.month_name B-depart_date.day_number
O O B-fromloc.city_name O B-toloc.city_name I-toloc.city_name O B-depart_date.month_name B-depart_date.day_number I-depart_date.day_number B-depart_date.year
O O O O B-transport_type O B-fromloc.airport_name I-fromloc.airport_name I-fromloc.airport_name I-fromloc.airport_name I-fromloc.airport_name O B-toloc.city_name
O O O O O B-fromloc.city_name O B-toloc.city_name I-toloc.city_name O O O O B-stoploc.city_name I-stoploc.city_name I-stoploc.city_name
O B-flight_time O O O O B-fromloc.city_name O B-toloc.city_name I-toloc.city_name
O B-fromloc.city_name I-fromloc.city_name O B-toloc.city_name O O O B-depart_time.period_of_day
O O O O O O B-aircraft_code O
O O O O O O O O B-depart_date.day_name O B-fromloc.city_name O B-toloc.city_name O O O O O B-stoploc.city_name
O O O O O O O O O O O O O O B-depart_date.month_name B-depart_date.day_number O B-fromloc.city_name O B-toloc.city_name B-depart_time.period_mod O O B-depart_time.period_of_day
O B-flight_time O O B-flight_mod O O B-fromloc.city_name O B-toloc.city_name I-toloc.city_name
O O O B-cost_relative I-cost_relative O O B-fromloc.city_name O B-depart_date.day_name B-depart_time.time_relative B-depart_time.time I-depart_time.time I-depart_time.time O O B-toloc.city_name
O O O O B-depart_date.today_relative B-depart_time.period_of_day O B-fromloc.city_name O B-toloc.city_name
O O O O B-cost_relative O O B-fromloc.city_name O B-toloc.city_name
O O O B-cost_relative B-round_trip I-round_trip O O B-fromloc.city_name O B-toloc.city_name O O B-depart_date.day_name B-depart_date.month_name B-depart_date.day_number
O O O O O B-fromloc.city_name O B-toloc.city_name I-toloc.city_name O B-depart_time.time_relative B-depart_time.time I-depart_time.time
O O O B-flight_mod B-class_type I-class_type O O O O O B-fromloc.city_name O B-toloc.city_name I-toloc.city_name
O O O O O O O B-fromloc.city_name O B-toloc.city_name O B-depart_date.month_name B-depart_date.day_number
O B-depart_time.period_of_day O O B-fromloc.city_name I-fromloc.city_name O B-toloc.city_name
O O O O O B-fromloc.city_name O B-toloc.city_name
O O O O B-flight_stop O O B-fromloc.city_name I-fromloc.city_name O B-toloc.city_name O O O O B-arrive_time.period_of_day O O O B-arrive_time.time_relative B-arrive_time.time I-arrive_time.time
O O O B-airline_name O O B-fromloc.city_name O B-toloc.city_name I-toloc.city_name O B-depart_date.month_name B-depart_date.day_number B-depart_date.year
O O B-depart_date.day_name B-depart_time.period_of_day O O B-fromloc.city_name O B-toloc.city_name
O O B-airline_name I-airline_name O B-fromloc.city_name O B-toloc.city_name O B-depart_date.day_name
O O O O O B-depart_date.month_name B-depart_date.day_number I-depart_date.day_number O O O O B-fromloc.city_name O B-toloc.city_name
O O O O O O O O O B-airline_name I-airline_name O B-fromloc.city_name O B-toloc.city_name
O O O B-fromloc.city_name O B-toloc.city_name O O B-arrive_time.start_time O B-arrive_time.end_time I-arrive_time.end_time
O O B-flight_stop O O B-arrive_date.day_name O B-fromloc.city_name O B-toloc.city_name
O O O O O O B-round_trip I-round_trip O O B-fromloc.city_name O B-toloc.city_name
O O O O O O B-depart_time.period_of_day O B-fromloc.city_name O O O O B-arrive_time.period_of_day O B-toloc.city_name
O O O B-flight_mod O O B-fromloc.city_name O B-toloc.city_name O O B-meal_description
O O O O B-fromloc.city_name O B-toloc.city_name
O O O O O O B-fromloc.city_name O B-toloc.city_name B-depart_time.time_relative B-depart_time.time I-depart_time.time O O B-depart_time.period_of_day
O O B-flight_stop O B-arrive_time.period_mod B-arrive_date.day_name B-arrive_time.period_of_day O B-fromloc.city_name O B-toloc.city_name
O O B-cost_relative B-round_trip I-round_trip O O B-fromloc.city_name O B-toloc.city_name
O O O O O O O B-fromloc.city_name O B-toloc.city_name I-toloc.city_name O B-airline_name I-airline_name
O O O O O O O O O B-fromloc.city_name I-fromloc.city_name O B-depart_time.time_relative B-depart_time.time I-depart_time.time O B-toloc.city_name O B-depart_date.day_name
O O O B-cost_relative O O B-fromloc.city_name O B-toloc.city_name O B-depart_date.day_name O O B-depart_time.time_relative B-depart_time.time O O B-meal_description
O O O B-flight_mod O O B-fromloc.city_name O B-toloc.city_name I-toloc.city_name
O O O B-fromloc.city_name O B-toloc.city_name I-toloc.city_name O O O B-depart_date.day_name B-depart_time.time_relative B-depart_time.time I-depart_time.time
O O O O B-fromloc.city_name I-fromloc.city_name O B-toloc.city_name O O B-depart_date.day_name O O B-flight_stop O O B-cost_relative O B-fare_amount I-fare_amount
O O O B-fromloc.city_name O B-toloc.city_name I-toloc.city_name O B-fromloc.city_name O B-toloc.city_name
O O O O O O O B-fromloc.city_name O B-toloc.city_name I-toloc.city_name O B-depart_date.day_name
O O B-airport_code O O
O O O O O O B-fromloc.city_name O B-toloc.city_name O B-depart_date.month_name B-depart_date.day_number I-depart_date.day_number
O O O O O B-fromloc.city_name O B-toloc.city_name B-depart_time.period_mod B-depart_date.day_name B-depart_time.period_of_day B-or B-depart_time.period_mod B-depart_date.day_name B-depart_time.period_of_day
O O O B-fromloc.city_name B-fromloc.state_code O B-toloc.city_name
O O O B-fromloc.city_name O B-toloc.city_name B-toloc.state_code O B-depart_date.month_name B-depart_date.day_number B-depart_time.time_relative B-depart_time.time I-depart_time.time
O O O O B-fromloc.city_name O B-toloc.city_name
O O O O O B-depart_time.period_of_day I-depart_time.period_of_day O O B-fromloc.city_name I-fromloc.city_name O B-toloc.city_name
O O O O O O O O O B-fromloc.airport_name I-fromloc.airport_name
O O O O O O B-fromloc.city_name O B-toloc.city_name
O O B-fare_basis_code O O
B-flight_mod O O B-fromloc.city_name O B-toloc.city_name I-toloc.city_name
O O O O O O O B-fromloc.city_name O B-toloc.airport_code
O O O O B-airline_name I-airline_name O O B-fromloc.city_name O B-toloc.city_name
B-round_trip I-round_trip O O B-fromloc.city_name O B-toloc.city_name B-cost_relative O B-fare_amount I-fare_amount
O O O B-airline_name O O O B-fromloc.city_name I-fromloc.city_name O B-toloc.city_name I-toloc.city_name B-flight_stop
O O O O O O O O O B-fromloc.city_name O B-toloc.city_name O B-class_type I-class_type O O B-airline_name I-airline_name
O O O O B-fromloc.city_name O B-toloc.city_name I-toloc.city_name O B-depart_date.day_name B-depart_time.period_of_day
O O O B-round_trip I-round_trip O O B-fromloc.city_name O B-toloc.city_name I-toloc.city_name I-toloc.city_name
O O O O O O B-fromloc.city_name O B-toloc.city_name O B-arrive_date.month_name B-arrive_date.day_number
O O B-cost_relative B-round_trip I-round_trip O O B-fromloc.city_name O B-toloc.city_name I-toloc.city_name
O O O O O B-fromloc.city_name O B-toloc.city_name I-toloc.city_name
O O O O O O B-fromloc.city_name O B-toloc.city_name I-toloc.city_name
O O O O O B-fromloc.airport_name I-fromloc.airport_name
O B-class_type I-class_type O O B-airline_name I-airline_name O B-fromloc.city_name O B-toloc.city_name
O O O B-flight_mod O O B-fromloc.city_name I-fromloc.city_name O B-toloc.city_name
O O B-fromloc.city_name I-fromloc.city_name O B-toloc.city_name
O O B-airline_code B-flight_number O B-fromloc.city_name O B-toloc.city_name O O B-meal
O B-flight_stop O O O O B-fromloc.city_name O B-toloc.city_name O O B-arrive_time.start_time O B-arrive_time.end_time I-arrive_time.end_time
O O O O O B-airline_name I-airline_name O B-fromloc.city_name O B-toloc.city_name
O O O B-depart_time.period_of_day O O B-fromloc.city_name O B-toloc.city_name O B-depart_date.day_name
O O O O B-class_type I-class_type O O O O O B-fromloc.city_name O B-toloc.city_name
O O O O O O O B-fromloc.city_name O B-toloc.city_name I-toloc.city_name
O O O B-fare_basis_code I-fare_basis_code O O B-fromloc.city_name O B-toloc.city_name O B-airline_name I-airline_name
O B-depart_time.period_of_day O O O O B-fromloc.city_name O B-toloc.city_name I-toloc.city_name I-toloc.city_name
O O O O B-fromloc.city_name O B-toloc.city_name
O O O O O O O O B-fromloc.city_name O B-toloc.city_name I-toloc.city_name
O O O O O O O O O O B-fare_basis_code
O O O O O O O O O O B-depart_date.month_name B-depart_date.day_number O B-fromloc.city_name O B-toloc.city_name O O O O O B-cost_relative I-cost_relative O B-depart_time.time_relative B-depart_time.time I-depart_time.time O O B-depart_time.period_of_day
O O O B-connect O O B-fromloc.city_name I-fromloc.city_name O B-toloc.city_name O B-depart_time.time_relative B-depart_time.time
O O O O O B-depart_date.day_name B-depart_time.time_relative B-depart_time.time I-depart_time.time O B-fromloc.city_name O B-toloc.city_name I-toloc.city_name I-toloc.city_name
O O O O O O O
O O O O O B-airline_name O B-fromloc.city_name O B-toloc.city_name I-toloc.city_name
O O O B-fromloc.city_name O B-toloc.city_name I-toloc.city_name
O O O B-airport_code
O O O O O O B-airline_name I-airline_name O B-class_type I-class_type O
O O O O O O O O B-fromloc.city_name O B-toloc.city_name
O O O B-fromloc.city_name I-fromloc.city_name B-depart_time.time_relative B-depart_time.time I-depart_time.time O O O B-toloc.city_name O B-stoploc.city_name
O O O O O O O O B-fromloc.city_name O B-toloc.city_name
O O O O O O O B-fromloc.city_name I-fromloc.city_name O B-toloc.city_name B-toloc.state_name I-toloc.state_name O O O B-stoploc.city_name
O O O O O O O B-fromloc.city_name O B-toloc.city_name I-toloc.city_name B-depart_time.time_relative B-depart_time.time O B-depart_date.day_name
O O O O O B-fromloc.city_name O B-toloc.city_name
O O O O O B-fromloc.city_name I-fromloc.city_name O B-toloc.city_name I-toloc.city_name B-flight_stop
O O O B-round_trip I-round_trip O O B-fromloc.city_name O B-toloc.city_name
O O O B-cost_relative B-round_trip I-round_trip O O B-fromloc.city_name I-fromloc.city_name O B-toloc.city_name
O O O O O B-flight_mod O O B-fromloc.city_name O B-toloc.city_name
O O O O O O B-fromloc.city_name O B-toloc.city_name B-depart_date.date_relative B-depart_date.day_name
O O O O O B-toloc.city_name O O O O B-fromloc.city_name O O O O
O O O O O O B-cost_relative I-cost_relative O O B-fromloc.city_name O B-toloc.city_name
O O O O O O B-fromloc.city_name O B-toloc.city_name O B-depart_date.day_name
B-fromloc.city_name O B-toloc.city_name B-depart_date.month_name B-depart_date.day_number I-depart_date.day_number
O O O O O B-fromloc.city_name O B-toloc.city_name
O O O O B-fromloc.city_name O B-toloc.city_name
O O O O B-fromloc.city_name O B-toloc.city_name B-class_type I-class_type O O O O O O O O O B-class_type I-class_type O
O O O O O O O B-fromloc.city_name O B-toloc.city_name B-class_type O O
O O O O O O O O B-fromloc.city_name O B-toloc.city_name I-toloc.city_name
O O O O O B-fromloc.city_name O B-toloc.city_name I-toloc.city_name O O O B-flight_stop I-flight_stop
O O B-airline_name I-airline_name O O O B-fromloc.city_name
O O O O O O B-fromloc.city_name B-fromloc.state_name B-depart_date.day_name O B-toloc.city_name B-arrive_date.day_name
O O O O O O O B-fromloc.city_name I-fromloc.city_name O B-toloc.city_name B-toloc.state_name O O O O B-depart_time.period_of_day O B-depart_date.day_name
O O O O O B-fromloc.city_name O B-toloc.city_name O O O B-stoploc.city_name
O O O O O O O B-fromloc.city_name O B-toloc.city_name B-flight_stop
O O O O O B-fromloc.city_name O B-toloc.city_name O B-depart_date.day_name B-depart_date.date_relative B-depart_date.day_name O O B-depart_time.time_relative B-depart_time.time
O O O O O B-fromloc.city_name O B-toloc.city_name
O O O O O O B-fromloc.city_name I-fromloc.city_name O B-toloc.city_name B-depart_time.time_relative B-depart_time.time I-depart_time.time
O O O B-fromloc.city_name O B-toloc.city_name I-toloc.city_name I-toloc.city_name
O O O B-cost_relative O O B-fromloc.city_name O B-toloc.airport_code
O O O O O B-fromloc.city_name I-fromloc.city_name O B-toloc.city_name I-toloc.city_name O O O O B-stoploc.city_name
O O O B-flight_mod O O B-fromloc.city_name O B-toloc.city_name B-toloc.state_code O B-depart_date.day_name
O O O O O O B-fromloc.city_name O B-toloc.city_name O B-depart_date.month_name B-depart_date.day_number
O O O B-depart_time.period_of_day O O B-fromloc.city_name O B-toloc.city_name
B-fromloc.city_name O B-toloc.city_name B-flight_days
B-depart_time.period_of_day O O B-fromloc.city_name O B-toloc.city_name
O O O O B-flight_time O B-class_type I-class_type O O B-fromloc.city_name O B-toloc.city_name O O
O O O O O O B-fromloc.city_name O B-toloc.city_name B-depart_time.time_relative B-depart_time.time
O O O O O O B-airline_name I-airline_name O O B-fromloc.city_name O B-toloc.city_name I-toloc.city_name
O O B-depart_time.period_of_day O O B-fromloc.city_name
O O O O O O O B-airport_name I-airport_name
O O O O O B-fromloc.city_name O B-toloc.city_name B-flight_stop
O O O B-flight_mod O O B-fromloc.city_name O B-toloc.city_name I-toloc.city_name
O O B-fromloc.airport_name I-fromloc.airport_name B-or B-fromloc.airport_code O B-toloc.city_name
O O B-cost_relative B-round_trip I-round_trip O O B-fromloc.city_name O B-toloc.city_name I-toloc.city_name
O O O O O B-fromloc.city_name B-fromloc.state_code O B-toloc.city_name
O O O O O O B-fromloc.city_name O B-toloc.city_name B-toloc.state_code O B-depart_date.day_name B-depart_time.time_relative B-depart_time.time I-depart_time.time O B-depart_date.day_name B-depart_time.time_relative B-depart_time.time I-depart_time.time
O O B-fromloc.city_name O B-toloc.city_name B-toloc.state_code
O O O O O O B-fromloc.city_name O B-toloc.city_name I-toloc.city_name
O O O O O B-fromloc.city_name O B-toloc.city_name O B-flight_stop
O B-flight_time I-flight_time O B-fromloc.city_name O B-toloc.city_name O O B-depart_time.time_relative O B-depart_time.time I-depart_time.time O B-depart_time.time_relative O B-depart_time.time I-depart_time.time
O O O O O O O O B-fromloc.city_name O B-toloc.city_name O O B-depart_time.time_relative B-depart_time.time I-depart_time.time
O O B-class_type I-class_type O O B-airline_name O B-depart_date.today_relative
O O O O O O O B-fromloc.city_name I-fromloc.city_name O B-toloc.city_name O B-depart_date.day_name
O O B-fromloc.city_name O O O O O O B-toloc.city_name I-toloc.city_name O B-depart_date.day_name
O O O O B-fromloc.city_name O B-toloc.city_name
O O O O O O B-fromloc.city_name O B-toloc.city_name O B-airline_name I-airline_name O O B-flight_mod I-flight_mod I-flight_mod O O B-depart_time.period_of_day
O O O O O B-fromloc.city_name O B-toloc.city_name O O O B-depart_date.day_name B-depart_time.time_relative B-depart_time.time I-depart_time.time I-depart_time.time
O O O B-flight_stop O O O B-fromloc.city_name O O B-toloc.city_name O B-arrive_date.month_name B-arrive_date.day_number
O B-round_trip I-round_trip O O B-fromloc.city_name O B-toloc.city_name O B-airline_code
O O O B-depart_date.day_name O O B-fromloc.city_name O B-toloc.city_name B-toloc.state_code
O O O O O B-depart_date.day_name O B-fromloc.city_name O B-toloc.city_name
O O O B-fromloc.city_name I-fromloc.city_name O B-toloc.city_name O B-depart_date.day_name
O O O O O B-airline_name B-flight_number O B-fromloc.city_name O B-toloc.city_name I-toloc.city_name
O O O B-fromloc.city_name O B-toloc.city_name B-toloc.state_code O B-depart_date.day_name
O O O O O O O O B-airport_name I-airport_name
O O B-fromloc.city_name O B-toloc.city_name O B-depart_date.day_name B-depart_time.period_of_day
O O O B-flight_mod O O B-fromloc.airport_name I-fromloc.airport_name
O O O O O O O O B-fromloc.city_name O B-toloc.city_name I-toloc.city_name
O O O O O B-fromloc.city_name I-fromloc.city_name O B-toloc.city_name B-depart_date.date_relative B-depart_date.day_name O O O B-arrive_time.period_of_day O O O B-return_date.date_relative O
O O O O O O O O O O B-city_name I-city_name
O O O O O B-fromloc.city_name O B-toloc.city_name O O O B-stoploc.city_name
O O O B-flight_mod O O O O B-fromloc.city_name O B-toloc.city_name
O O O O O B-fromloc.city_name O B-toloc.city_name
O O O O O O B-toloc.airport_name I-toloc.airport_name O O O
O O B-airport_code O O
O O O B-fromloc.city_name O B-toloc.city_name I-toloc.city_name I-toloc.city_name
O O O O B-flight_time I-flight_time O B-depart_time.period_of_day O B-airline_name I-airline_name O B-depart_date.month_name B-depart_date.day_number O B-fromloc.city_name O B-toloc.city_name I-toloc.city_name
O O O B-flight_mod O O B-toloc.city_name I-toloc.city_name I-toloc.city_name O O O O B-fromloc.city_name
O O O O O O O O B-fromloc.city_name O B-toloc.city_name
O O O O B-fare_basis_code
O O O O O B-airline_name O B-depart_time.time_relative B-depart_time.time I-depart_time.time O B-depart_date.month_name B-depart_date.day_number O B-fromloc.city_name O B-toloc.city_name
O O B-fromloc.city_name O B-toloc.city_name I-toloc.city_name O O B-depart_time.period_of_day
O O O B-flight_mod O O B-fromloc.city_name O B-toloc.airport_name I-toloc.airport_name O B-depart_date.today_relative
O O O O O O O B-fromloc.city_name O B-depart_date.day_name B-depart_time.period_of_day O O O B-toloc.city_name
O O O O O B-fromloc.city_name O B-toloc.city_name O B-depart_date.day_name
O O O B-cost_relative O O B-fromloc.city_name O B-toloc.city_name
O O O B-class_type I-class_type
O O O O O B-fromloc.city_name I-fromloc.city_name O B-toloc.city_name O O B-fromloc.city_name O B-toloc.city_name I-toloc.city_name O B-fromloc.city_name I-fromloc.city_name O B-toloc.city_name I-toloc.city_name
O O O O O B-fromloc.city_name B-fromloc.state_code O B-toloc.city_name I-toloc.city_name O B-fromloc.city_name B-depart_time.time_relative B-depart_time.time I-depart_time.time O B-depart_date.day_name
O O O O O B-airline_name O O B-fromloc.city_name O B-toloc.city_name B-depart_time.time_relative B-depart_time.time I-depart_time.time
O O O O O O O B-fromloc.city_name O B-toloc.city_name O O B-toloc.city_name O B-arrive_time.time I-arrive_time.time B-arrive_date.day_name B-arrive_time.period_of_day O B-or B-arrive_time.time_relative B-arrive_time.time I-arrive_time.time B-arrive_date.day_name B-arrive_time.period_of_day
O O O O O O O B-airport_name I-airport_name
O O O O B-fromloc.city_name O B-toloc.city_name B-toloc.city_name O B-toloc.city_name
O O O O O B-fromloc.city_name O B-toloc.city_name
O O B-fromloc.city_name O B-toloc.city_name O B-depart_date.day_name
O O O O O O O O O B-fromloc.city_name O B-toloc.city_name O O B-depart_date.day_number I-depart_date.day_number O B-depart_date.month_name
O O O O O B-fromloc.city_name O B-toloc.city_name I-toloc.city_name O O B-flight_stop O O B-arrive_time.time_relative B-arrive_time.time O B-arrive_time.time_relative B-arrive_time.time I-arrive_time.time
O O O B-flight_time I-flight_time O B-fromloc.city_name O B-toloc.city_name
O O O B-fromloc.city_name O B-toloc.city_name I-toloc.city_name I-toloc.city_name
O O O O O O O O O
O O O O O O O O O O O B-fromloc.airport_name I-fromloc.airport_name O B-toloc.city_name O
O O B-city_name
O O O O O O O O B-fromloc.city_name O B-toloc.city_name O O B-depart_time.period_of_day
O O O O O O O O B-fromloc.city_name O B-toloc.city_name
O O O B-depart_date.day_name B-depart_time.period_of_day O O B-fromloc.city_name I-fromloc.city_name O B-toloc.city_name O B-airline_name I-airline_name
O O O B-airline_name I-airline_name O O O B-depart_time.period_of_day O B-fromloc.city_name O B-toloc.city_name I-toloc.city_name
O O O O O O B-city_name
O O O O O B-fromloc.city_name O B-toloc.city_name I-toloc.city_name
O B-city_name O O O O O B-transport_type
O O O O O O O O O O B-fromloc.city_name O B-toloc.city_name O O O O B-stoploc.city_name I-stoploc.city_name O O O O O B-meal_description
O O O O O B-fromloc.city_name O B-toloc.city_name O B-depart_date.day_name B-depart_time.period_of_day O B-depart_date.day_name B-depart_time.period_of_day
O O O O O O O B-fromloc.city_name I-fromloc.city_name O O O B-toloc.city_name
O O B-fromloc.city_name O B-toloc.city_name I-toloc.city_name
O O O O O B-fromloc.city_name O B-toloc.city_name O B-depart_date.day_name B-depart_time.period_of_day
O O O B-airline_code
O O O O B-depart_date.today_relative O B-fromloc.city_name O B-toloc.city_name I-toloc.city_name O O O O B-stoploc.city_name I-stoploc.city_name O O O B-meal_description
O O B-flight_mod O O O B-fromloc.city_name O O O B-toloc.city_name B-arrive_date.date_relative B-arrive_date.day_name
O O O O O O O O O B-fromloc.airport_name I-fromloc.airport_name I-fromloc.airport_name I-fromloc.airport_name
O B-transport_type O O O B-city_name
O O O O B-fare_basis_code O
O O B-airline_name O O B-fromloc.city_name
O B-depart_date.day_name O O O O O B-fromloc.city_name I-fromloc.city_name O B-toloc.city_name
O O O O B-fromloc.city_name O
O O O O B-depart_date.day_name B-depart_time.period_of_day O B-fromloc.city_name O B-toloc.city_name
O O O O O B-fromloc.city_name I-fromloc.city_name O B-toloc.city_name B-toloc.city_name O B-toloc.city_name
O O O O O O O O B-flight_mod O O B-fromloc.city_name O B-toloc.city_name O O B-depart_time.period_of_day
O O O O O B-fromloc.city_name O B-toloc.city_name
O O B-depart_time.period_of_day O O O B-fare_amount I-fare_amount O B-fromloc.city_name O B-toloc.city_name
O O O B-fromloc.city_name O B-toloc.city_name I-toloc.city_name
O O O B-fromloc.city_name O B-toloc.city_name
O O O B-fromloc.city_name O B-toloc.city_name I-toloc.city_name
O O O O B-depart_date.today_relative B-depart_time.period_mod O B-fromloc.city_name O B-toloc.city_name O B-meal_description O
O O O O O B-economy O B-fromloc.city_name O B-toloc.city_name
O O O O O B-fromloc.city_name B-fromloc.state_name O B-toloc.city_name I-toloc.city_name B-toloc.state_name O B-depart_date.date_relative B-depart_date.day_name
O O O B-cost_relative B-round_trip I-round_trip O O B-fromloc.city_name I-fromloc.city_name O B-toloc.city_name O B-fromloc.city_name I-fromloc.city_name B-depart_time.time_relative B-depart_time.time I-depart_time.time
O B-airline_name I-airline_name O O O B-fromloc.city_name O B-toloc.city_name
O O O O O B-airline_name I-airline_name O B-fromloc.city_name O B-toloc.city_name O O B-depart_time.period_mod B-depart_time.period_of_day O O O O O
O O O O O B-fromloc.city_name O B-toloc.city_name O B-depart_date.day_name B-depart_time.period_of_day
O O O O O B-fromloc.city_name O B-toloc.city_name I-toloc.city_name
O O O O O B-depart_time.period_of_day O O B-depart_date.day_name O B-fromloc.city_name O B-toloc.city_name O
O O O O O O O B-fromloc.city_name O B-toloc.city_name O B-depart_date.day_name B-depart_time.period_of_day
O B-class_type I-class_type O O O O B-depart_date.month_name B-depart_date.day_number I-depart_date.day_number B-depart_date.year O B-fromloc.city_name O B-toloc.city_name
O O O O O B-fromloc.city_name O B-toloc.city_name B-depart_date.today_relative O O O B-meal
O O O O O O B-fromloc.city_name O B-toloc.city_name
O O B-fromloc.city_name O B-toloc.city_name
O O O B-fromloc.city_name O B-toloc.city_name B-round_trip I-round_trip B-depart_time.time_relative B-depart_time.time I-depart_time.time B-cost_relative O B-fare_amount
O O O O B-flight_mod O O O B-fromloc.city_name O B-toloc.city_name
O O O O O B-fromloc.city_name O B-toloc.city_name
O O O O B-fare_basis_code O
O O O O O O B-toloc.city_name O B-fromloc.city_name O B-arrive_time.time_relative B-arrive_time.time I-arrive_time.time
O O O B-cost_relative O O B-fromloc.city_name O B-toloc.city_name O O O
O O O B-flight_stop O B-fromloc.city_name I-fromloc.city_name O B-toloc.city_name O O O O B-arrive_date.day_name
O O B-days_code
O O O O O B-fromloc.city_name O B-toloc.city_name I-toloc.city_name
O O O O B-fare_basis_code O
O O O O O O B-fromloc.city_name O O B-toloc.city_name O B-fromloc.city_name B-depart_time.period_mod O O B-depart_time.period_of_day
O O O B-flight_mod O O B-depart_date.day_name O B-fromloc.city_name O B-toloc.city_name B-toloc.state_code
O O O O B-depart_date.day_name O B-toloc.city_name I-toloc.city_name O B-fromloc.city_name
O O O O O B-fromloc.city_name O B-toloc.city_name I-toloc.city_name
O O O O B-airline_name I-airline_name O O B-fromloc.city_name O B-toloc.city_name
O B-airline_name O O O O O B-fromloc.city_name O B-toloc.city_name
O O O B-economy O O B-fromloc.city_name O B-toloc.city_name
O O O O O O O O O B-fromloc.airport_name I-fromloc.airport_name O O
O O B-depart_time.time_relative B-depart_time.time I-depart_time.time B-fromloc.city_name B-fromloc.city_name
O O O O O O O B-fromloc.city_name I-fromloc.city_name O B-toloc.city_name O B-flight_stop I-flight_stop O B-stoploc.city_name
O O O B-flight_mod O O B-depart_date.day_name O B-fromloc.city_name O B-toloc.city_name
O O O O O B-cost_relative B-round_trip I-round_trip O O B-fromloc.city_name O B-toloc.city_name O B-depart_date.month_name B-depart_date.day_number
O O B-airport_code O
O O O O O O B-fromloc.city_name O B-toloc.city_name
O O O O O O B-fromloc.city_name I-fromloc.city_name I-fromloc.city_name O B-toloc.city_name I-toloc.city_name
O O O B-flight_mod O O B-fromloc.city_name O B-toloc.city_name
O O O O B-depart_date.today_relative O B-fromloc.city_name I-fromloc.city_name O B-toloc.city_name O O B-depart_time.period_of_day
O O O O O B-fromloc.city_name O B-toloc.city_name
O O O O O O B-toloc.city_name O B-arrive_date.month_name B-arrive_date.day_number O O O B-fromloc.city_name B-or B-fromloc.city_name
O O O O O B-fromloc.airport_name I-fromloc.airport_name O O O
O O O B-flight_mod O O O O O B-fromloc.city_name O B-toloc.city_name
O O O B-round_trip I-round_trip B-class_type O O B-airline_name I-airline_name O B-fromloc.city_name O B-toloc.city_name I-toloc.city_name
O O O O B-fromloc.city_name I-fromloc.city_name O B-toloc.city_name O B-depart_date.day_name B-depart_time.period_of_day
O O O O O O B-fromloc.city_name O B-toloc.city_name
O O O O O O B-fromloc.city_name O B-toloc.city_name
O B-fromloc.city_name O B-toloc.city_name
B-fromloc.city_name O B-toloc.city_name
O O B-airline_name I-airline_name O O O B-fromloc.city_name O B-depart_date.day_name O O O B-stoploc.city_name
O O O O O B-fromloc.city_name O B-toloc.city_name B-depart_date.today_relative
O O O B-connect O O B-fromloc.city_name O B-toloc.city_name O O B-depart_time.period_of_day O B-depart_date.month_name B-depart_date.day_number I-depart_date.day_number O O B-flight_stop
O O O O B-cost_relative O O O B-fromloc.city_name O B-toloc.city_name O B-depart_date.month_name B-depart_date.day_number
O B-airline_name O O B-city_name
O O O O O O B-fromloc.city_name O B-toloc.city_name I-toloc.city_name
O O O B-city_name
O O O O O B-fromloc.city_name O B-toloc.city_name I-toloc.city_name I-toloc.city_name O O O O O O B-arrive_time.time_relative B-arrive_time.time
O O O B-fromloc.city_name O B-toloc.city_name O B-depart_date.day_name
O O O O B-fromloc.city_name O B-toloc.city_name O B-depart_time.time_relative B-depart_time.time I-depart_time.time
O O O B-depart_date.month_name B-depart_date.day_number O O O O O O B-fromloc.city_name O B-toloc.city_name O B-depart_time.period_mod O O B-depart_time.period_of_day B-depart_time.time_relative B-depart_time.time
O O O B-fromloc.city_name O B-toloc.city_name B-toloc.state_code O B-depart_date.month_name B-depart_date.day_number
O O O B-depart_time.period_of_day B-depart_time.period_of_day O O B-fromloc.city_name O B-toloc.city_name
O O O B-cost_relative O O B-fromloc.city_name O B-toloc.city_name O O B-depart_date.month_name B-depart_date.day_number I-depart_date.day_number
O O B-fromloc.city_name O B-toloc.city_name B-toloc.state_name O B-depart_date.day_name
O O O O O O B-fromloc.city_name O B-toloc.city_name I-toloc.city_name O B-depart_date.day_name O O O B-toloc.city_name I-toloc.city_name B-arrive_time.time_relative B-arrive_time.time I-arrive_time.time
B-depart_time.period_of_day O O O B-fromloc.city_name I-fromloc.city_name O B-toloc.city_name B-arrive_time.period_of_day
O O O O O O B-fromloc.city_name O B-toloc.city_name O O B-arrive_time.time_relative B-arrive_time.time
O O O B-flight_mod B-fromloc.city_name O O B-toloc.city_name O O B-flight_mod O O O B-fromloc.city_name O O O O O O B-toloc.city_name O O O O O O O O B-toloc.city_name O O B-return_date.date_relative
O O O O B-cost_relative B-round_trip I-round_trip O O B-fromloc.city_name O B-toloc.city_name O B-depart_date.month_name O B-depart_date.day_number
O O O O O O O B-fromloc.city_name O B-toloc.city_name B-toloc.state_name O B-depart_date.day_name B-depart_time.period_of_day
O B-depart_time.period_of_day O O O O B-fromloc.city_name O B-toloc.city_name O O B-flight_mod
O O O O B-city_name
O O O O O O O B-fromloc.city_name O B-toloc.city_name O O O B-stoploc.city_name
B-fromloc.city_name O B-toloc.city_name
B-transport_type I-transport_type O B-city_name B-state_code
O B-airline_name I-airline_name O O B-toloc.city_name I-toloc.city_name O B-fromloc.city_name
O O O O O O O O O O O B-fromloc.city_name O B-toloc.city_name
O O O O B-fromloc.city_name O B-toloc.city_name
O O O O B-fare_basis_code
O O O B-flight_mod O O B-fromloc.city_name O B-toloc.city_name I-toloc.city_name O B-depart_date.day_name O O B-meal_description
O O O O O B-fromloc.city_name O B-toloc.city_name B-depart_time.period_mod O B-depart_date.day_name B-depart_time.period_of_day
O O O O O O O O B-city_name
O O O O O O O O B-class_type I-class_type O B-depart_date.day_name O B-fromloc.city_name I-fromloc.city_name O B-toloc.city_name O O B-depart_time.time O B-depart_time.time_relative
O O O O B-airline_name I-airline_name B-fromloc.city_name O B-toloc.city_name B-flight_days B-flight_stop O
O O O O O B-fromloc.city_name O B-toloc.city_name O B-depart_time.time_relative B-depart_time.time I-depart_time.time O O O O O O O O O O O O
O O O B-fare_basis_code
O O B-city_name I-city_name
O O O O O O O O O O B-toloc.city_name I-toloc.city_name B-arrive_date.date_relative B-arrive_date.day_name B-arrive_time.period_of_day O O O O O O O B-fromloc.city_name I-fromloc.city_name O O O O O O B-fromloc.city_name I-fromloc.city_name
O O O B-flight_mod O O B-fromloc.city_name B-fromloc.state_code O B-toloc.city_name I-toloc.city_name O O O O
O O O O O O B-city_name
O O B-fromloc.city_name O B-toloc.city_name O O B-arrive_time.start_time O B-arrive_time.end_time I-arrive_time.end_time
O O O O B-fare_basis_code O
O O O B-fromloc.city_name I-fromloc.city_name I-fromloc.city_name O B-toloc.city_name I-toloc.city_name
O O O O O O B-city_name B-state_name
O O O O B-fromloc.city_name O B-toloc.city_name I-toloc.city_name O B-airline_name I-airline_name
O O O O O O O O O B-fromloc.airport_name I-fromloc.airport_name
O B-flight_stop O O B-fromloc.city_name I-fromloc.city_name O B-toloc.city_name O O O O B-arrive_time.period_of_day
O O O B-fromloc.city_name B-fromloc.city_name O B-fromloc.city_name
O O B-class_type I-class_type O O B-airline_name I-airline_name O
O O O O O B-toloc.city_name O B-fromloc.city_name
O O O O O O B-fromloc.city_name O B-toloc.city_name
O O O O B-fromloc.city_name O B-toloc.city_name O B-depart_date.day_name B-depart_time.period_of_day B-or B-depart_date.day_name B-depart_time.period_of_day
O O O O O B-airline_name I-airline_name O B-fromloc.city_name O B-toloc.city_name
O O O O B-fare_basis_code
O O O O O B-airline_name I-airline_name O B-depart_date.month_name B-depart_date.day_number O O B-depart_time.period_of_day
O O O O O O B-fromloc.city_name O B-toloc.city_name
B-cost_relative O O B-fromloc.city_name O B-toloc.city_name
O O O O B-airline_name I-airline_name O O O O O O O B-fare_basis_code
O O B-flight_stop O O B-fromloc.city_name O B-toloc.city_name O O B-toloc.city_name B-arrive_time.time_relative B-arrive_time.time I-arrive_time.time
B-fromloc.city_name O B-toloc.city_name O O B-depart_date.month_name B-depart_date.day_number
O O O O O B-flight_time O O O B-fromloc.city_name I-fromloc.city_name O B-toloc.city_name
O O O O B-fromloc.city_name O B-toloc.city_name
O O O O O O B-city_name
O O O O O O O B-fromloc.airport_name I-fromloc.airport_name I-fromloc.airport_name I-fromloc.airport_name O B-fromloc.city_name
O O O O B-fromloc.city_name B-fromloc.state_name O B-toloc.city_name O O O B-cost_relative B-round_trip I-round_trip
O O O O O B-fromloc.city_name O B-toloc.city_name
O O O B-city_name
O O O O O B-fromloc.city_name O B-toloc.city_name O B-depart_date.day_name O B-depart_date.day_name
O O B-airline_code B-flight_number O B-fromloc.city_name O B-toloc.city_name O O B-depart_date.day_name
O O O O O O O O O B-fromloc.city_name O B-toloc.city_name O B-depart_date.month_name B-depart_date.day_number I-depart_date.day_number O O O O O O B-stoploc.city_name O O O
O O O O O B-fromloc.city_name O B-toloc.city_name O O O O B-cost_relative O O
O O O O O B-fromloc.city_name O B-toloc.city_name
O O O O B-depart_date.day_name B-depart_time.period_of_day O B-fromloc.city_name O B-toloc.city_name
O O O B-restriction_code I-restriction_code
O O O O O B-fromloc.city_name O B-toloc.city_name I-toloc.city_name O O O O B-stoploc.city_name
O O O O O B-fromloc.city_name I-fromloc.city_name O B-toloc.city_name
B-flight_mod B-depart_time.period_of_day O O B-fromloc.city_name O B-toloc.city_name
O O O O O B-fromloc.city_name O B-toloc.city_name O B-depart_date.month_name B-depart_date.day_number B-depart_date.year
O O O O O B-depart_date.day_name B-depart_time.period_of_day O B-fromloc.city_name O B-toloc.airport_code
O O O O O O O B-airline_name I-airline_name O B-fromloc.city_name O B-toloc.state_code O B-depart_date.month_name B-depart_date.day_number I-depart_date.day_number
B-airline_name I-airline_name B-flight_number O B-fromloc.city_name O B-depart_time.time O O O B-flight_time I-flight_time O B-toloc.city_name
O O O O O O O B-depart_time.period_mod B-depart_date.day_name B-depart_time.period_of_day O B-fromloc.city_name O B-toloc.city_name
O O O O O O B-fromloc.city_name O B-toloc.city_name
O O O O B-fromloc.city_name O B-toloc.city_name
O O O O O O O O O B-fromloc.city_name O B-toloc.city_name
O O O O O B-fromloc.city_name O B-toloc.city_name I-toloc.city_name
O O O O B-fromloc.city_name I-fromloc.city_name O B-toloc.city_name O O O B-stoploc.city_name
O O O B-fromloc.city_name B-fromloc.state_code O B-toloc.city_name I-toloc.city_name O B-depart_date.month_name B-depart_date.day_number
B-round_trip I-round_trip O O B-fromloc.city_name O B-toloc.city_name B-cost_relative B-fare_amount I-fare_amount
O B-flight_stop O O B-fromloc.city_name I-fromloc.city_name O B-toloc.city_name O O B-arrive_date.day_name O O B-cost_relative O B-fare_amount I-fare_amount B-round_trip I-round_trip
O O O O B-airline_name I-airline_name O B-fromloc.city_name O B-toloc.city_name O B-arrive_time.time_relative B-arrive_time.time I-arrive_time.time
O B-class_type I-class_type O O B-fromloc.city_name I-fromloc.city_name O B-toloc.city_name O B-airline_name I-airline_name
O O O B-flight_mod O O B-fromloc.airport_name O B-toloc.airport_code
O B-airport_name I-airport_name
O O O B-airline_name I-airline_name O B-fromloc.city_name O B-toloc.city_name B-connect O B-stoploc.city_name
O O B-flight_stop O O B-arrive_date.day_name B-arrive_time.time_relative B-arrive_time.time O B-fromloc.city_name O B-toloc.city_name
B-fromloc.city_name O B-toloc.city_name O B-depart_date.day_name
O O O O O O O O O O O O O B-fromloc.city_name O B-toloc.city_name
O O O O O B-airline_code
O O O O B-fromloc.city_name I-fromloc.city_name O B-toloc.city_name O B-depart_date.day_name
O O O O O O O O O O B-fromloc.airport_name I-fromloc.airport_name O O B-toloc.city_name
O O O O B-fromloc.city_name O B-toloc.city_name I-toloc.city_name O B-depart_date.month_name B-depart_date.day_number
O O B-depart_time.period_of_day O O B-fromloc.city_name O B-toloc.city_name
O O B-fromloc.city_name B-or B-fromloc.city_name O O O O B-stoploc.city_name O O B-toloc.city_name I-toloc.city_name
O O O O B-fromloc.city_name O B-toloc.city_name
O O O O O B-fromloc.city_name O B-toloc.city_name
O O O O O B-fromloc.city_name I-fromloc.city_name I-fromloc.city_name O B-toloc.city_name B-depart_date.day_name B-depart_date.month_name B-depart_date.day_number
B-fromloc.city_name O B-toloc.city_name I-toloc.city_name
O O O B-flight_mod O O B-fromloc.city_name O B-toloc.city_name I-toloc.city_name
O O O B-transport_type O O O O B-fromloc.airport_name I-fromloc.airport_name
B-city_name O O
O B-flight_mod O O B-fromloc.city_name O B-toloc.city_name I-toloc.city_name O O O O O O B-meal
O O O B-fare_basis_code O
O O O B-airline_code
O O O O O B-transport_type I-transport_type O B-city_name
O O O O O B-depart_date.day_name B-or B-depart_date.day_name O B-fromloc.city_name O B-toloc.city_name
O O O O O O B-fromloc.city_name O B-toloc.city_name
O O B-fromloc.city_name I-fromloc.city_name O B-toloc.city_name O B-depart_date.day_name
O O O B-flight_stop O O B-fromloc.city_name O B-toloc.city_name I-toloc.city_name
O O O O B-fromloc.city_name I-fromloc.city_name O B-toloc.city_name O B-depart_date.month_name B-depart_date.day_number
O O O O O B-fromloc.city_name O B-toloc.city_name
O O O O O B-fromloc.city_name O B-toloc.city_name O B-depart_date.day_name
O O O B-flight_mod O O B-fromloc.city_name O B-toloc.city_name I-toloc.city_name B-mod B-airline_name O B-flight_number
O O O B-cost_relative I-cost_relative O O B-fromloc.city_name O B-toloc.city_name O B-depart_date.day_name B-depart_time.time_relative B-depart_time.time
O O O O O O O O B-fromloc.city_name O B-toloc.city_name B-depart_time.time_relative B-depart_time.time I-depart_time.time
O O O O O B-fromloc.city_name O B-toloc.city_name O O B-fromloc.city_name B-depart_time.time_relative B-depart_time.time B-depart_date.today_relative
O O O O O O O O B-transport_type O B-city_name
O O O O O O B-airline_code B-flight_number O B-fromloc.city_name O B-toloc.city_name
O O O O B-fromloc.city_name O B-toloc.city_name B-depart_time.time_relative B-depart_time.time I-depart_time.time I-depart_time.time O B-depart_date.day_name
O O O B-flight_mod O O B-fromloc.city_name O B-toloc.city_name
O O O O O B-airline_name O B-fromloc.city_name O O B-depart_time.period_of_day
O O O B-fromloc.city_name I-fromloc.city_name I-fromloc.city_name O B-toloc.city_name I-toloc.city_name
O O O O O O O B-fromloc.city_name O B-toloc.city_name O O O O B-depart_time.period_of_day
O O O O O B-fromloc.city_name O B-toloc.city_name O B-class_type B-round_trip I-round_trip
O O O O O B-round_trip I-round_trip O B-fromloc.city_name O B-toloc.city_name
O O O O O O O O O O B-fromloc.city_name O O B-toloc.city_name O O B-arrive_time.period_of_day
O O O O O B-fromloc.city_name O B-toloc.city_name O B-depart_date.day_name O B-depart_date.date_relative O
O O O O O B-airline_name I-airline_name O B-fromloc.city_name O B-toloc.city_name
B-depart_time.period_of_day O B-fromloc.city_name O B-toloc.city_name
O O O O B-fromloc.city_name O B-toloc.city_name
O O O B-fromloc.city_name O B-toloc.city_name I-toloc.city_name O B-depart_date.day_name O B-arrive_time.time_relative B-arrive_time.time I-arrive_time.time
O O O O O B-city_name I-city_name
O O O O O O B-fromloc.city_name B-fromloc.state_name I-fromloc.state_name O B-toloc.city_name B-toloc.state_name O B-connect O B-stoploc.city_name
