# Supplementary material
Source: ML conference proceedings conference paper supplement (https://aclanthology.org/P19-1544)
Supplement: Supplementary [file P19-1544.Supplementary.zip › SF-ID-network/data/snips/test/seq.in]

add sabrina salerno to the grime instrumentals playlist
i want to bring four people to a place that s close to downtown that serves churrascaria cuisine  
put lindsey cardinale into my hillary clinton s women s history month playlist  
will it snow in mt on june 13  2038
play signe anderson chant music that is newest
can you let me know what animated movies are playing close by
can you get me reservations for a highly rated restaurant in seychelles
what s the weather here on 2/7/2021
find worldly goods starting now at a movie house
on june 27  2026 i d like to go to a delaware gastropub
what movies are playing at mann theatres
find a movie called living in america 
find on dress parade
make a reservation at a bakery that has acquacotta in central african republic for five 
where can i purchase the tv show time for heroes
will the wind die down at my current location by supper time
please search the young warriors game 
make me a reservation in south carolina
what movie theatre is showing if the huns came to melbourne
restaurant in bulgaria this week party for 9 numbers
rate the current novel four of 6 stars
add the song don t drink the water to my playlist
add this tune by rod argent to propuesta alternativa playlist
show the movie times
will it snow in amy
what will the weather be at nine am in hi
in one hour find king of hearts
book a spot for ten at a top-rated  caucasian restaurant not far  from selmer
play music from clark kent in the year 1987
add to the rock games
add this artist to pop 2017 picks
i rate shadow of suribachi at five stars 
play some sixties music 
what film is playing nearby
add nothing fancy to meditate to sounds of nature playlist
get the video game of the chipmunk song
rate lamy of santa fe 5 of 6 stars
show me movie schedules
what will the weather be in lago vista on october fourteenth  2022
weather next year in canada
play a new symphony by perfecto de castro on lastfm
rate cuisines of the axis of evil and other irritating states one out of 6
play arif music from the fourties 
what is the weather of east portal ks
play a melody from elmer bernstein
what is the weather going to be like in klondike gold rush national historical park on february the 28th  2034
play songs by sarah harding
rate the chronicle ten from tomorrow a 2
book a table for 2 at a restaurant in follett
book a brasserie in samoa for four people 
play the new noise theology e p 
find a reservation at a restaurant that serves gougère in laneville with a party of nine
find the cold dead hand video game for me
book a bakery for lebanese on january 11th  2032
rate the book an appeal from the new to the old whigs a 0
book a table for 8 at a restaurant that serves far breton 
rate this current novel 1 stars
i rate secret water as a 4 
is unbeatable harold at century theatres
please find me asking alexandria discography
what will the weather be in berville ak on feb  6  2017
is it warm in botna
please add a track to my playlist called this is coti
find the via dolorosa: songs of redemption saga
can you add confessions to my playlist called clásica
find the schedule for nearby animated movies 
book a table today at a steakhouse for eight that serves sashimi
play the last sound track by soko from around 1975
add this song to blues roots
coon chicken inn restaurant for 1 am for me  clarice and debbie
add karusellen to jazz brasileiro
play some steve boyett chant music
give 1 out of 6 points to this novel
show the movie schedule of animated movies close by
please play the newest music by evil jared hasselhoff
add tune to my mellow bars playlist
put coming back to life onto winter music
rate this textbook a zero
i want to hear any tune from the twenties
play me a top-ten song by phil ochs on groove shark
find a video game called family dog 
rate awaiting strange gods: weird and lovecraftian fictions a 1
add lisa m to my guitar hero live playlist
what is the weather forecast for my current place
add strong to the metal monday playlist
where can i find conduct unbecoming
will it be freezing in the current position
add the da brat track to the soak up the sun playlist 
add a track to the another glass playlist 
find now and forever
the workout playlist needs more chris cross
play some jungle music on iheart
give 1 point to current textbook
put no mystery into my punk essentials playlist  
i want to put look to you on the playlist named 80s classic hits
what time is beat the devil coming on at mann theatres
rate the current chronicle a zero
add garry shider album to my classical essentials
add the artist cho kyu hyun to funky jams
find the work i looked up
play this is colour by panda bear
play the god that failed on vimeo 
can i get the butterfly crush showings
add hanging on to my just dance by aftercluv playlist 
show me when scandalous john is playing 
a day no pigs would die deserves a best rating of 6 and a value of 4
for my crossfit playlist add the soul sessions volume 2
play some james cleveland 
put this tune on dancepop
what time will paris by night aired
play music on spotify 
i want a matt garrison tune in my fresh finds fire emoji playlist  
will there be snowfall at six pm in leisure knoll california
search for the television show me and my guitar
tell me when it will be chilly in chicken  united kingdom
is it windy in telogia
find a tv show called revenge of the nerds 
find the video game called turnin me on
play the song i get ideas as performed by richard kruspe
add turk to the deep house playlist
find a reservation at fish express
check the forecast for the current spot in the future oct  19  2037 
how can i view the show corpus: a home movie about selena
i would rate that old ace in the hole one stars and a best rating of 6
add the rating for this current series a four out of 6 points
add justin mcroberts to this is chopin
book a bar that serves italian-american cuisine neighboring wilson av for one person 
is fog forecast close-by to pakistan
book a restaurant for 3 people at eighteen oclock in saint vincent and the grenadines 
find the schedule for films at night at great escape theatres 
is there snow in the district of columbia
find a movie schedule
rate the beggar of volubilis 1 out of 6
what is the forecast in heber
please play an album from 1987
show me the courts of chaos
give the current book five stars out of 6 
when is fine  totally fine playing
add a tune to clásicos del hip hop español
play jawad ahmad
what is the forecast for in 1 second at monte sereno for freezing temps
i would like to eat fast food and have a party of two in kentucky 
play music from itunes for ric grech
add jennie  jennie to my metal playlist
show the tv show the last samurai 
add rob tyner to betsy s we everywhere
show me the weather forecast for the city of spencer
how is the weather in getzville  minnesota
what is dear old girl cooper foundation
i need a weather forecast for são tomé and príncipe on december 8th  2026
what animated movies are showing in the area 
tell me the weather forecast for april 15  2019 here
play the track asleep in the deep
play kurt cobain ballad tunes
can you add a track to my spain top 50 playlist
at meal time while i m here will it be hot
can you find me the magic hour song
add mary wells sings my guy to the electro sur playlist 
play some kyle ward from the seventies
book a table around london borough of ealing that is highly rated in a gluten free bar
when is crime and punishment u s a  showing
will it snowstorm in long lake national wildlife refuge
rate current essay a zero
book me a reservation at a bar around juliff for three people that serves bucatini for now
book a highly rated place in in in seven years  at a pub
what time is southern theatres showing ukraine is not a brothel
add this album ny bill callahan to my mi casa es la tuya playlist oficial list 
find a soundtrack called pax warrior
book a table for ten for breakfast in minnesota 
what is the local movie schedule
book a restaurant for three on feb  18
i d like to know what movies are on the movie schedules nearby 
please make me reservations somewhere for eight people in foley  nv
she me movie times at mann theatres
find the picture ultima vi: the false prophet
play the best album from the seventies
add kylie minogue to my novedades viernes sudamérica playlist  
is it freezing in colorado
the last hawk gets a total of 3 out of 6 stars from me
will it be stormy in ma
play pop 2017 picks
play some theme songs from 1974
what will the weather be in la at 9 o clock
can you add xanadu to latin alternative music
can you find me the naked city – justice with a bullet album
please search the work  eve-olution 
add i dreamt of a dragon to my futuros hits playlist  
add this artist to the laugh list
i d like to eat at a restaurant around china with a party of 7 anywhere that serves ouzeri
the sleep machine waterscapes playlist needs some kris chetan ramlu in it  
rate the current chronicle five stars
rate this novel five of 6
my rating for the eiffel tower and other mythologies is 0 out of 6 stars
i d like a table for midday at the unseen bean
where can i see the movie across the line: the exodus of charlie wright
turn on spotify to tiny tim ep
what are the movie schedules
i want a table for me and my kids in turkey at a neighboring restaurant
play a top 5 song from wally bastian on google music
please search the ironbound picture 
put a gary clark song into the soul bpm playlist  
will it be hot on orthodox good friday in michigan and close-by
i want to see the television show called cuts both ways
i d like to reserve a table at a pub that serves andouillettes within the same area in san marino 
what is the weather like in hurstville
put this album on my wild country playlist
rate this textbook 2 out of 6
search for the complots
find the schedule for the band of honest men at the nearest movie theatre 
what will the weather be in waverly city brazil on purple heart day
what is the weather forecast in delaware
play a top-50 tune from 1982 
play shinji miyazaki s music on netflix
can i get the game list of mew singles
what s the forecast for belize around meal time
add gary lachman track to jazz for loving couples playlist
find the path to power 
put artist paulinho da costa on my very nearly nashville playlist
i am looking for the work: nikki
what s the weather in low moor
play some nineties music
find a television show called swing high 
use netflix to play bizzy bone kiss me goodnight  sergeant major
i d like to see movie schedules for kerasotes theatres
i want these are the days added to my spotlight spain 2016 playlist  
play the greatest soundtrack by nhat son on last fm 
what is the tv series in app store
book the space aliens grill & bar in hord wy for feb  the twenty-seventh 
find a saga called set sail the prairie
can jovino santos neto s album get added to my confidence boost playlist
show animated movies in nearest movie theatre
find the game company of heroes
where can i find paranormal activity 3 playing near me 1 hour from now
book a table this evening in saint vincent and the grenadines at a gastropub
can i listen to dj vibe s top 10
what films are at the nearest cinema
what is the weather like in north salt lake and afghanistan
can you tell me the actors of the saga awards/
go to my all out 00s and add brian wilson
food truck in panama for five
look up the movie schedule
book a table for chasity ruiz and mary at the fat duck in puerto rico
find the gill deacon show 
find the movie schedule for films in the area 
will i be able to watch camping-car at movie house at 6 pm
play how does it work by helen carter 
what s the weather like in schenectady ma
play some folk-rock music
give this current book zero out of 6
rate this album 5 points
how is the weather right now at my current place
play sixties music by giovanni battista guadagnini 
tell me the weather forecast close by brown county state park for meal time
play the last wellman braud album relaesd 
play sugar baby by frank beard
find the schedule for the solitude of prime numbers at the nearest cinema in 1 hour  
play the discografia de the pretty reckless saga
i want to give the current textbook 0 out of 6 stars
show me movie times for animated movies playing three hours from now in the neighbourhood 
find the game just dance greatest hits
add this track to the sin ti playlist
show me the closest movie house playing an unfinished life at eight pm 
what s it like in bahrain right now
can you add blood on the face to the playlist called heartland country
on jan  the twentieth what will it feel like in ct or the area not far from it
i need a table in uruguay in 213 days when it s chillier
add this track by horace andy to acoustic soul
plan an album by roni duani 
add song to siesta
can you tell me the weather forecast for samoa
play music on youtube
add spirit touches ground to my leche con chocolate list
i need a table for 1 minute from now at any pub for five around in that also serves fisn n chips 
book a spot at the food truck in ma
21 weeks from now elinor  crystal turner and nita want to eat german food at a bar in distant california
find a tv show called ruthless
find animated movies close by with a movie schedule
book a spot for 7 at an outdoor food court in denmark
i would rate the persistence of vision 1 stars and a best rating of 6
i need a reservation for february 27  2020 at a bar that serves paté
find the ghost of tom joad
i need a reservation for ten at a tavern in west virginia
what time is children of divorce playing
will there be a blizzard in white house curacao
play the top melody from artist maakii
are any animated movies playing at magic johnson theatres
give the current album a five 
i want to add digital line to my playlist called infantil
the current essay gets four points
what will the weather be in grand coteau ut at six pm
can you find me a trailer for phineas redux
add the singer ivan roudyk to my fairy tales playlists 
add song in my playlist dance workout
what movies can i see in the area
tell me what films are playing at plitt theatres
add in the heart of the world to the epic gaming playlist
find movie times
rate the book english grammar in use a five
play tujiko noriko s ten years and running 
add the song to the soundscapes for gaming playlist 
can you put a song by jessica mauboy on my playlist entitled a sudden rainstorm
show movie schedule
show me movie schedules for today 
add cecil womack to my 50 great female voices playlist 
will it be freezing here in 9 seconds
forecast for serbia
i want to give a mortal flower a two
where can i view the picture reaching horizons
in hawaii will it be warmer at 3 am
rate the little book four stars
rate the current textbook one of 6 stars
i want a table for five at a restaurant with latin food in arkansas for 1 hour from now
find love will tear us apart  a photograph
please play me a popular track from 1984 
book a mediterranean restaurant for my sister and i
how will the weather be different 5 years from now in waconia
search for teenage mutant hero turtles: fall of the foot clan photograph
play party anthems
what is the niceville forecast in fm
find heat wave
which is the nearest movie house playing the diary of anne frank
can i have the movie schedule for imax corporation
book me a reservation for eight for the top-rated bakery eleven hours from now in mango
play yung joc on slacker
show 50 words for snow creative picture
play the electrochemical and solid state letters song
table for 8 at a popular food court
find me a table for 8 people at a nearby al restaurant one minute from now 
is there rain now in maine
show me the photograph johnny cash: the complete columbia album collection
find movie schedules 
find movie schedules for  united paramount theatres 
what is the forecast for montana at dinner
please add this track to my de camino playlist
book me a restaurant please 
find drumline: a new beat  a picture
play the red room sessions from chris cunningham
play the great adventures of slick rick game
list movie schedules for movies playing close by
i am looking for the tv show called the flight of the lost balloon
add david axelrod to my futuros hits list
play me sun ra songs from the fifties
add this track to my dinnertime acoustics playist
add tune to atmospheric black metal playlist
need to see mother joan of the angels in one second 
give 2 out of 6 points to the following textbook 
i would like to book a restaurant for two in 42 weeks from now in wagram
play some last fm music like the 1992 ep from peaches
where is the closest cinema playing a drink in the passage
i m hoping you can find a photograph from live at the isle of wight 1970 
what movies are around here
book a restaurant distant from downtown 
find doggy day school  an album
please play bitch please ii
find a video game called young 
is strauss is playing today at the cineplex odeon corporation
award this current novel 0 points
weather for this winter here
what animated movies are playing at the closest movie theatre
rate this book four of 6 points
i want to go see the trouble with girls
cock-a-doodle-doo was awful  i m giving it a 0 out of 6 
show me the schedule of films in the neighbourhood
book a table for nine people in svalbard and jan mayen 
i would give french poets and novelists a best rating of 6 and a value of three
what animated movies are playing nearby
will there be a cloud here at 06:50:20
i want to give the chronicle zombie bums from uranus 3 points
i d like to know when i can see the taking of flight 847: the uli derickson story at amco entertainment 
play is this my world by leo arnaud
book a reservation for clinton street baking company & restaurant distant from downtown
add nyoil to my this is prince playlist
show me the everybody wants you picture
find a restaurant in fm that servec quiche 
i would give this current novel 2 stars with a best rating of 6
i want to book a pastelaria cafe in alabama for me and my great grandfather 
is hail in the weather forecast for monterey bay national marine sanctuary
add tune to sxsw fresh playlist
make a reservation in a popular sicilian bar place nearby  for me only  tomorrow
i need a table for 9
add this artist to my post-grunge playlist
rate this album a 2
what will the weather be like this tuesday in the area neighboring rendezvous mountain educational state forest
i need a table in ottoville on feb  15th  2029 at gus stevens seafood restaurant & buccaneer lounge
i need a table for five at childs restaurants in brunei 
how do i get the game still on it
i would like to make a reservation for 2 for brunch 
need a table  for party of five for december 26  2040 in the state of mt
book me a restaurant for nine in statham
i d like a table for ten in 2 minutes at french horn  sonning eye
find a movie house for 07:52 showing ganges: river to heaven
what is the michael moore is a big fat stupid white man video game
i want to eat close to bowlegs seven years from now
for my playlist chill add the name cater fe she
search for the halfway home tv show
find movie times
play journey list
tell me what animated movies i can see at the closest movie theatre
i d like to see the trailer tony parker
what time is holiday heart showing at the movie house
play the movie white christmas
is it forecast to be warm in doi inthanon national park
add this tune to cristina s endorphin rush playlist
play a song by nash the slash
i rate doom 3: worlds on fire a 1 of 6
what time is phil ochs: there but for fortune playing at the movie house
add andreas johnson to my rock save the queen playlist
i d like to watch take this waltz
what are the mann theatres showtimes for secret sunshine
will there be snowfall in kitlope heritage conservancy
play geddy lee music on spotify sort by top
rate in the eyes of mr  fury zero of 6
look up the tv series operace silver a
i m looking for the tv series  called unborn
play the song memories are my only witness
i give the phishing manual four stars out of 6 
play clásicos del hip hop español
add rupee to my ultra metal playlist
add shi xin hui to my piano chill playlist 
what time is the clutching hand playing at amco entertainment
add circus to my post garage wave revival list
the chronicle charlie peace earns 4 stars from me
find conker: live and reloaded
show me the nearest movie house showing the luckiest girl in the world
play track music from peter finestone on netflix sort by newest
play the song shine a light
book a popular restaurant of thai cuisine
which animated movies are playing in the neighbourhood and when
i want to listen to the song only the greatest
i d like to eat at the best restaurant 
is it going to be chilly in western sahara in 13 hours
i want to book a restaurant for four around zapata
rate if tomorrow comes 2 of 6 stars
the book history by contract is rated five stars in my opinion 
i want to book a bar in bonaparte palau 
i m looking for dead at 21  the tv series
can you make reservations at a tea house that serves fettucine
put a track by lil mama into my guest list sneaky zebra playlist  
put some frank ferrer into my edna st vincent millay playlist  
what is the forecast for niger
rate this novel a 3
add this ruth crawford seeger song to my playlist called the soundtrack 007
is it going to snow next year in wv
is romulus and the sabines playing at the nearest cinema at ten
show me the new showings for animated movies in the neighborhood
play the video game the genesis machine
i want to go to 88th st-boyd av or close by and book seats for 10
i need to add to the funk soul disco playlist my favorite artist
i want to book a cafe for 3 in fargo
where can i watch tv series shopping spree
play an andy silvester sound track from the thirties on spotify
i d like to eat at a popular brasserie in chile with a party of 5
what s the forecast for my current place at five pm
give private games 3 stars out of 6
in 17 minutes  will it be foggy in songimvelo game reserve
how hot will it be in wisconsin on august fourth
i d like to put qriii onto songs to sing in the car 
will it be chilly in oakdale ok
add dwele to marguerite s eurovision 2016 playlist
what s the weather forecast for croatia on jul  25th
find tv series titled a life in the death of joe meek
open fadl shaker on spotify and play a melody starting with the newest
please add jency anthony to my playlist this is mozart
whats the weather in ga
i rate the chronicle  son of the tree with four of 6 points 
add git to domingo indie
will there be cloud coverage in verdery  myanmar
rate maps for lost lovers 1 of 6
will it snow in granbury
play me a cinder block movement
find the tv series shaun the sheep
i want to hear the jody williams sound track
what is the forecast for foggy conditions here in twenty one minutes
book a table at grecian coffee house for 7 on apr  7th  2024
show creative photograph of icewind dale: heart of winter
rate the manxman 5 out of 6
add this song to my lo que suena new york playlist
find reproductions: songs of the human league
play a 2001 sound track on deezer 
weather for ma in the morning
play a ballad by bob johnston
is there a snowstorm in russia
will it be nice on aug  the nineteenth in beda bulgaria
i d like for you to put this artist to my evening commute playlist 
play the caps lock trailer
give me the movie schedules for warren theatres
i need current movie schedules 
add even serpents shine to dorothea s indie hipster playlist
play ep by arjen anthony lucassen
give 4 points to this novel
add star light  star bright to my jazz classics playlist  
put nothing remains the same on my summer music playlist
weather for the night time in new mexico
add pangaea to my gold edition playlist
find me a movie with the name oshin
add ian stuart donaldson to canadian country
show me movie time for i am sorry  at my movie house
please add ruud jolie to my playlist guest list polygon
add patti page album to i love my neo soul
add an album by twink to my classic country playlist
will it be a snowy day in dalcour
rate this essay a two out of 6
find the movie schedules for animated movies nearby at 09:44 am 
add armand van helden to my black sabbath the ozzy years playlist
give this chronicle a 4
i m looking for a churrascaria place with wifi that can serve a party of five 
what time is goodbye mothers playing
book the city tavern in holiday ks 
what movies are playing dickinson theatres
rate the key word and other mysteries 4 of 6
i d like to watch may blossom
play some music on slacker
i want to rate the ingenuity gap 3 out of 6
add song to my wild country playlist
what is the weather forecast for close-by burkina
i want to watch supernatural: the unseen powers of animals
listen to dragon ball: music collection
add troy van leeuwen to my nu metal list
add born free to fresh r&b
book at table at forest av restaurant close-by for 2 1 second from now
can you get me the trailer of the multiversity
are there movies at malco theatres
rate the current chronicle series 3 out of 6 points
can i get the movie times
i want to add hind etin to my la mejor música dance 2017 playlist
play some latin on zvooq
what is the freezing forecast for british virgin islands
pull up sweeney todd - il diabolico barbiere di fleet street
put four rating on the raging quiet
show me the tv show limit of love: umizaru
which movies are playing at the closest cinema
add this album by karl davydov to reyna s this is luis fonsi playlist
where can i see the television show falling away from me
book me a table for 5 at a best rated restaurant in italy
will there be a snowstorm in taberville
add this song to this is no te va gustar playlist
can i get the movies  showtimes for the closest movie house 
do you have something like impossible is nothing by abderrahmane abdelli
what is the weather forecast for cistern
please make reservations in yeager for seven am at a highly rated indian brasserie
play me a nineties sound track
where can i find thor meets captain america
i need to have pat alger s album placed onto the spotlight spain 2016 playlist 
can i get the movie times for fox theatres
i d like to watch wish you were dead
i d like to watch apocalypse 2024
show creativity of song a discord electric
is love and other troubles playing
show me the current movie times
rate the lie tree five
i want to add another album to the wine & dine playlist  
add another tune to my pumping iron playlist  
play a track by mila islam from deezer
is it rainy season in manitou springs
give 2 stars to the doom brigade
add this tune to my dinnertime acoustics list
what are the current movie schedules
what is the showtime for arsho
list movie times at harkins theatres
what movies are showing in the neighborhood 
play my playlist tgif on itunes
what will the weather be like on january 2nd  2025 in ga
what animated movies are playing in the neighbourhood and when
book a spot at savoy hotel and grill that is neighboring wisconsin
can you find me the back when i knew it all album
add george thorogood to el mejor rock en español
play the album how insensitive
i m looking for the pokémon: the movie 2000 tv show
place this tune onto my dinner for 2 playlist 
where can i see the trailer for love on the beat
list movie times at megaplex theatres
will it be chillier at 06:05:48 in wagener réunion
what is the weather in south bradenton
get jump down painting
please book a room in spaghetti warehouse for catalina  delores and brandie mendoza at 12 am
what is the nh forecast for mexican hat
i need to book a top-rated steakhouse this autumn  for 1 around azerbaijan
will it be chillier at my current location in one minute
show me heavenly sword
what is the weather forecast for close-by gu 3 years from now
will it be freezing on 4/20/2038 in american beach nc
i need the wather for next week in the philippines
add tune to my metal crash course playlist
i would like to book the best food court with persian food within the same area as ok for my ex husband and i 
i d like to see the picture the principle of hope
rate this series 2 out of 6
find a man needs a maid
book a restaurant close by my daughters s work location with burrito three years from now
add this tune to the refugee playlist
find time for movie times now
i would like to book a highly rated brasserie with souvlaki neighboring la next week 
find the panic in needle park
is it freezing on jun  the 21st in apshawa south africa
i need to take three people to eat
play a 2006 chant
show me the schedule of the loves of letty in cinema closest
play the top 20 ep from the fifties by john bundrick 
show creativity of photograph of my wonderful day
book a table in the united states for 10 at the berghoff
i d like to book a brasserie in virginia city  ga 
will it be temperate in the same area in vi
rate the current novel four out of 6 points
is it going to get chillier near hocking state forest
for the current saga i rate 2 of 6 stars
i want to play the video game espn major league soccer
rate the current book a three
rate this novel 0 of 6 stars
is it going to be chillier at 10 pm in texas
what s the weather in timbo
add the blurred crusade to crate diggers anonymous
tell me the weather forecast for sugarloaf provincial park ten weeks from now
add a gackt camui track to the white noise playlist  
rate canto for a gypsy two of 6 stars
i m looking for circus world 
this textbook gets a two
show me the movie times 
add song to my underground hits
play the album journeyman
find the family jams saga
play rob mills album the golden archipelago 
book a spot at a restaurant within walking distance of palau
find me the balance and timing book
find movie schedules for bow tie cinemas 
add get happy to cherry s las canciones más lindas del mundo
rate this textbook a 1
shw the picture twin husbands
rate a taste of blackberries  a three
play the 1991 soundtrack from ian mcdonald
find an album called just call me stupid 
play the insoc ep
i want to hear major harris s songs from the fifties
book a restaurant in donnelly
rate the saint in trouble 1 of 6
play punk rock music
look for a photograph of i wanna sex you up
what is the humidity like in faraway on ak
i d like to eat at an internet restaurant with a party of four
when is just before nightfall playing
play moondog s chupacabra 
add album to pop rising
rate this book three points
i am giving this current book album 0 out of 6 stars
play artist vlada divljan from something he did that is good
what will the humidity be in varnado georgia at one am
add no prejudice to 90s indie
what are the movies movie times nearby
i want to hear some songs from the twenties
please make reservations for nine at 3 am 
can you pull up queen of the organ
lets hear some dawood sarkhosh from their the power of your love album from groove shark
will it get overcast in la dolores
book a spot for kelli  jean and i at a pub at elevenses
add this candi staton artist to my dancefloor hits
i want to add a song by jazz brasileiro
rate wielding a red sword 0 stars
book a taverna that serves bengali for six at five
play the tv series heart of gold
show crafty hands saga
will it be hotter in wyomissing hills
show weather while sunset in the same area in south carolina
table for one somewhere in palco
i would like to add something by kuk harrell to my hip hop 2017 new school playlist
add list of rush instrumentals to this is lady antebellum
where can i see a slice of life
the current textbook gets a 2 rating  
add wing track to all a cappella
show me dangers of the canadian mounted
please add this this tune to the playlist this is selena
what will the weather be in stelvio national park 1 hour and 1 minute from now
can you put musiri subramania iyer s song onto the lo-fi love soundtrack
i want to add michelle heaton to this is chopin
show me the movie operetta for the theatre organ
where s the nearest movie house playing no trains no planes
put a xiang xiang track onto women of the blues
can you add a track by david wolfenberger to janell s all funked up playlist
play the album vibrations by marion elise raven
add fabri fibra to evening acoustic
can you play any chant from the fourties
show the night riders
i m looking for a movie called salvage mice 
find your personal touch 
add this tune to my weekend playlist
is it going to storm in black rock alaska
show the movie schedules at united paramount theatres
i want to read the saga michael clayton
book me a table for 3 at tkk fried chicken in sri lanka
rate this book titled the improvisatore five stars
book a restaurant for one person at 7 am
weather for beauregard il
will there be alot of wind on march 13th in lost creek bahrain
i d like a reservation at a place in iran for neva  alice and maggie parker 
show me movie schedule for animated movie around here at eleven a m 
i give this book dictionary of the english language a 4 rating
play some symphonic rock 
add to my playlist all funked up this track
find a tv series called armageddon summer
find politicsnation with al sharpton 
rate this album 0 points out of 6
add leah kauffman to my uncharted 4 nathan drake playlist
rate this album two out of 6
