# Supplementary material
Source: ML conference proceedings conference paper supplement (https://aclanthology.org/P19-1544)
Supplement: Supplementary [file P19-1544.Supplementary.zip › SF-ID-network/data/snips/train/label]

PlayMusic
AddToPlaylist
RateBook
PlayMusic
AddToPlaylist
AddToPlaylist
PlayMusic
PlayMusic
SearchScreeningEvent
BookRestaurant
GetWeather
RateBook
SearchScreeningEvent
PlayMusic
GetWeather
BookRestaurant
BookRestaurant
AddToPlaylist
BookRestaurant
AddToPlaylist
SearchScreeningEvent
AddToPlaylist
SearchCreativeWork
SearchCreativeWork
AddToPlaylist
SearchScreeningEvent
SearchCreativeWork
RateBook
SearchScreeningEvent
SearchScreeningEvent
PlayMusic
RateBook
AddToPlaylist
SearchScreeningEvent
SearchCreativeWork
BookRestaurant
GetWeather
PlayMusic
AddToPlaylist
SearchCreativeWork
SearchCreativeWork
BookRestaurant
SearchScreeningEvent
PlayMusic
GetWeather
AddToPlaylist
GetWeather
RateBook
SearchScreeningEvent
SearchScreeningEvent
BookRestaurant
PlayMusic
PlayMusic
BookRestaurant
RateBook
AddToPlaylist
RateBook
GetWeather
AddToPlaylist
GetWeather
PlayMusic
AddToPlaylist
RateBook
SearchScreeningEvent
SearchCreativeWork
RateBook
SearchScreeningEvent
PlayMusic
RateBook
PlayMusic
SearchCreativeWork
SearchCreativeWork
RateBook
AddToPlaylist
SearchCreativeWork
RateBook
BookRestaurant
GetWeather
RateBook
AddToPlaylist
SearchCreativeWork
RateBook
SearchCreativeWork
AddToPlaylist
GetWeather
SearchCreativeWork
SearchScreeningEvent
RateBook
SearchCreativeWork
AddToPlaylist
RateBook
SearchCreativeWork
AddToPlaylist
AddToPlaylist
SearchCreativeWork
SearchCreativeWork
BookRestaurant
SearchCreativeWork
AddToPlaylist
BookRestaurant
PlayMusic
AddToPlaylist
SearchCreativeWork
RateBook
RateBook
GetWeather
PlayMusic
BookRestaurant
BookRestaurant
SearchScreeningEvent
AddToPlaylist
BookRestaurant
SearchCreativeWork
SearchCreativeWork
AddToPlaylist
SearchScreeningEvent
AddToPlaylist
PlayMusic
AddToPlaylist
AddToPlaylist
SearchCreativeWork
BookRestaurant
RateBook
AddToPlaylist
BookRestaurant
GetWeather
RateBook
PlayMusic
PlayMusic
SearchCreativeWork
SearchCreativeWork
SearchScreeningEvent
SearchCreativeWork
PlayMusic
SearchCreativeWork
SearchScreeningEvent
SearchScreeningEvent
AddToPlaylist
GetWeather
RateBook
SearchScreeningEvent
PlayMusic
AddToPlaylist
RateBook
RateBook
SearchScreeningEvent
SearchCreativeWork
RateBook
GetWeather
BookRestaurant
RateBook
AddToPlaylist
RateBook
BookRestaurant
PlayMusic
RateBook
PlayMusic
GetWeather
AddToPlaylist
BookRestaurant
AddToPlaylist
SearchScreeningEvent
GetWeather
GetWeather
PlayMusic
GetWeather
SearchCreativeWork
PlayMusic
BookRestaurant
PlayMusic
RateBook
SearchCreativeWork
SearchCreativeWork
SearchCreativeWork
SearchScreeningEvent
SearchCreativeWork
SearchScreeningEvent
SearchCreativeWork
SearchScreeningEvent
PlayMusic
PlayMusic
AddToPlaylist
AddToPlaylist
AddToPlaylist
RateBook
SearchScreeningEvent
RateBook
PlayMusic
SearchCreativeWork
SearchScreeningEvent
GetWeather
AddToPlaylist
SearchCreativeWork
GetWeather
BookRestaurant
PlayMusic
PlayMusic
BookRestaurant
BookRestaurant
PlayMusic
SearchCreativeWork
AddToPlaylist
AddToPlaylist
RateBook
GetWeather
AddToPlaylist
RateBook
BookRestaurant
GetWeather
AddToPlaylist
AddToPlaylist
SearchCreativeWork
BookRestaurant
SearchScreeningEvent
RateBook
RateBook
GetWeather
SearchScreeningEvent
AddToPlaylist
SearchScreeningEvent
SearchCreativeWork
RateBook
SearchCreativeWork
AddToPlaylist
SearchCreativeWork
AddToPlaylist
AddToPlaylist
GetWeather
SearchCreativeWork
PlayMusic
PlayMusic
BookRestaurant
RateBook
PlayMusic
PlayMusic
RateBook
BookRestaurant
RateBook
SearchScreeningEvent
PlayMusic
PlayMusic
AddToPlaylist
SearchCreativeWork
AddToPlaylist
SearchCreativeWork
AddToPlaylist
AddToPlaylist
BookRestaurant
PlayMusic
PlayMusic
BookRestaurant
PlayMusic
AddToPlaylist
GetWeather
RateBook
RateBook
SearchScreeningEvent
GetWeather
GetWeather
AddToPlaylist
BookRestaurant
RateBook
BookRestaurant
RateBook
GetWeather
BookRestaurant
PlayMusic
PlayMusic
PlayMusic
BookRestaurant
AddToPlaylist
GetWeather
SearchCreativeWork
SearchScreeningEvent
GetWeather
SearchScreeningEvent
RateBook
PlayMusic
SearchScreeningEvent
BookRestaurant
SearchScreeningEvent
GetWeather
SearchCreativeWork
GetWeather
SearchCreativeWork
BookRestaurant
GetWeather
AddToPlaylist
GetWeather
BookRestaurant
RateBook
AddToPlaylist
BookRestaurant
SearchCreativeWork
GetWeather
BookRestaurant
SearchScreeningEvent
BookRestaurant
PlayMusic
BookRestaurant
SearchCreativeWork
PlayMusic
AddToPlaylist
GetWeather
SearchScreeningEvent
SearchScreeningEvent
RateBook
SearchCreativeWork
SearchCreativeWork
AddToPlaylist
AddToPlaylist
AddToPlaylist
RateBook
PlayMusic
SearchCreativeWork
GetWeather
RateBook
AddToPlaylist
PlayMusic
AddToPlaylist
SearchCreativeWork
SearchCreativeWork
BookRestaurant
SearchScreeningEvent
PlayMusic
AddToPlaylist
SearchCreativeWork
SearchScreeningEvent
PlayMusic
GetWeather
AddToPlaylist
BookRestaurant
PlayMusic
AddToPlaylist
GetWeather
BookRestaurant
RateBook
SearchScreeningEvent
SearchCreativeWork
SearchCreativeWork
RateBook
BookRestaurant
PlayMusic
GetWeather
SearchScreeningEvent
SearchScreeningEvent
PlayMusic
SearchCreativeWork
BookRestaurant
BookRestaurant
GetWeather
BookRestaurant
GetWeather
RateBook
GetWeather
GetWeather
SearchScreeningEvent
PlayMusic
AddToPlaylist
RateBook
BookRestaurant
RateBook
BookRestaurant
SearchScreeningEvent
PlayMusic
RateBook
RateBook
RateBook
AddToPlaylist
AddToPlaylist
GetWeather
AddToPlaylist
RateBook
RateBook
SearchCreativeWork
SearchCreativeWork
SearchScreeningEvent
BookRestaurant
AddToPlaylist
GetWeather
AddToPlaylist
PlayMusic
SearchCreativeWork
SearchScreeningEvent
RateBook
SearchScreeningEvent
RateBook
SearchScreeningEvent
SearchScreeningEvent
AddToPlaylist
GetWeather
BookRestaurant
GetWeather
AddToPlaylist
GetWeather
SearchCreativeWork
AddToPlaylist
SearchScreeningEvent
GetWeather
BookRestaurant
SearchCreativeWork
AddToPlaylist
BookRestaurant
RateBook
PlayMusic
SearchCreativeWork
GetWeather
SearchCreativeWork
AddToPlaylist
BookRestaurant
AddToPlaylist
PlayMusic
BookRestaurant
BookRestaurant
SearchScreeningEvent
BookRestaurant
BookRestaurant
SearchScreeningEvent
SearchCreativeWork
RateBook
SearchScreeningEvent
PlayMusic
GetWeather
PlayMusic
PlayMusic
SearchScreeningEvent
GetWeather
GetWeather
SearchScreeningEvent
RateBook
SearchCreativeWork
GetWeather
GetWeather
PlayMusic
AddToPlaylist
SearchCreativeWork
RateBook
AddToPlaylist
AddToPlaylist
RateBook
AddToPlaylist
RateBook
PlayMusic
SearchScreeningEvent
BookRestaurant
GetWeather
PlayMusic
SearchScreeningEvent
GetWeather
AddToPlaylist
GetWeather
SearchScreeningEvent
SearchCreativeWork
RateBook
BookRestaurant
RateBook
SearchScreeningEvent
SearchCreativeWork
RateBook
AddToPlaylist
RateBook
AddToPlaylist
SearchScreeningEvent
BookRestaurant
GetWeather
AddToPlaylist
SearchScreeningEvent
AddToPlaylist
GetWeather
GetWeather
AddToPlaylist
AddToPlaylist
PlayMusic
SearchScreeningEvent
SearchCreativeWork
SearchScreeningEvent
BookRestaurant
SearchCreativeWork
PlayMusic
PlayMusic
BookRestaurant
RateBook
RateBook
GetWeather
GetWeather
GetWeather
BookRestaurant
PlayMusic
BookRestaurant
RateBook
SearchCreativeWork
PlayMusic
AddToPlaylist
SearchScreeningEvent
SearchCreativeWork
PlayMusic
SearchScreeningEvent
AddToPlaylist
BookRestaurant
RateBook
AddToPlaylist
SearchScreeningEvent
BookRestaurant
RateBook
AddToPlaylist
GetWeather
AddToPlaylist
SearchCreativeWork
RateBook
PlayMusic
GetWeather
SearchScreeningEvent
SearchScreeningEvent
SearchScreeningEvent
SearchScreeningEvent
PlayMusic
BookRestaurant
RateBook
PlayMusic
RateBook
PlayMusic
RateBook
BookRestaurant
AddToPlaylist
PlayMusic
SearchScreeningEvent
PlayMusic
RateBook
BookRestaurant
RateBook
SearchScreeningEvent
GetWeather
SearchCreativeWork
SearchCreativeWork
BookRestaurant
BookRestaurant
SearchScreeningEvent
PlayMusic
BookRestaurant
SearchCreativeWork
BookRestaurant
BookRestaurant
RateBook
SearchCreativeWork
SearchScreeningEvent
BookRestaurant
SearchScreeningEvent
SearchScreeningEvent
SearchScreeningEvent
BookRestaurant
AddToPlaylist
RateBook
BookRestaurant
BookRestaurant
SearchScreeningEvent
RateBook
GetWeather
SearchScreeningEvent
BookRestaurant
PlayMusic
AddToPlaylist
BookRestaurant
BookRestaurant
GetWeather
PlayMusic
AddToPlaylist
BookRestaurant
GetWeather
GetWeather
PlayMusic
AddToPlaylist
RateBook
AddToPlaylist
AddToPlaylist
SearchScreeningEvent
SearchCreativeWork
AddToPlaylist
AddToPlaylist
SearchScreeningEvent
SearchCreativeWork
BookRestaurant
PlayMusic
SearchCreativeWork
SearchScreeningEvent
RateBook
SearchCreativeWork
AddToPlaylist
RateBook
GetWeather
RateBook
RateBook
SearchCreativeWork
RateBook
SearchCreativeWork
RateBook
BookRestaurant
AddToPlaylist
GetWeather
RateBook
PlayMusic
SearchScreeningEvent
AddToPlaylist
SearchCreativeWork
SearchScreeningEvent
BookRestaurant
PlayMusic
SearchCreativeWork
SearchScreeningEvent
AddToPlaylist
SearchCreativeWork
AddToPlaylist
GetWeather
AddToPlaylist
PlayMusic
GetWeather
GetWeather
RateBook
PlayMusic
GetWeather
PlayMusic
SearchScreeningEvent
GetWeather
SearchCreativeWork
GetWeather
RateBook
GetWeather
AddToPlaylist
SearchScreeningEvent
SearchScreeningEvent
AddToPlaylist
AddToPlaylist
RateBook
PlayMusic
GetWeather
SearchScreeningEvent
BookRestaurant
GetWeather
SearchScreeningEvent
BookRestaurant
GetWeather
RateBook
AddToPlaylist
SearchScreeningEvent
RateBook
PlayMusic
AddToPlaylist
PlayMusic
RateBook
PlayMusic
RateBook
BookRestaurant
AddToPlaylist
SearchCreativeWork
BookRestaurant
RateBook
RateBook
RateBook
SearchCreativeWork
BookRestaurant
SearchScreeningEvent
GetWeather
SearchCreativeWork
GetWeather
PlayMusic
AddToPlaylist
SearchCreativeWork
PlayMusic
AddToPlaylist
GetWeather
GetWeather
PlayMusic
PlayMusic
RateBook
RateBook
BookRestaurant
SearchCreativeWork
GetWeather
PlayMusic
SearchScreeningEvent
AddToPlaylist
AddToPlaylist
SearchCreativeWork
SearchScreeningEvent
PlayMusic
AddToPlaylist
BookRestaurant
SearchCreativeWork
PlayMusic
BookRestaurant
GetWeather
PlayMusic
RateBook
GetWeather
SearchCreativeWork
RateBook
PlayMusic
AddToPlaylist
SearchScreeningEvent
BookRestaurant
SearchScreeningEvent
AddToPlaylist
PlayMusic
RateBook
BookRestaurant
BookRestaurant
SearchCreativeWork
SearchScreeningEvent
PlayMusic
AddToPlaylist
SearchScreeningEvent
BookRestaurant
SearchCreativeWork
BookRestaurant
SearchScreeningEvent
GetWeather
AddToPlaylist
PlayMusic
RateBook
AddToPlaylist
SearchScreeningEvent
GetWeather
RateBook
AddToPlaylist
GetWeather
AddToPlaylist
SearchCreativeWork
AddToPlaylist
PlayMusic
RateBook
PlayMusic
RateBook
BookRestaurant
RateBook
SearchCreativeWork
PlayMusic
RateBook
AddToPlaylist
RateBook
GetWeather
SearchCreativeWork
PlayMusic
AddToPlaylist
GetWeather
GetWeather
SearchCreativeWork
GetWeather
SearchScreeningEvent
BookRestaurant
RateBook
RateBook
SearchScreeningEvent
PlayMusic
GetWeather
SearchCreativeWork
SearchScreeningEvent
RateBook
SearchScreeningEvent
RateBook
SearchCreativeWork
AddToPlaylist
PlayMusic
SearchScreeningEvent
GetWeather
RateBook
AddToPlaylist
AddToPlaylist
SearchScreeningEvent
GetWeather
BookRestaurant
GetWeather
RateBook
RateBook
SearchCreativeWork
SearchCreativeWork
GetWeather
SearchScreeningEvent
BookRestaurant
BookRestaurant
GetWeather
GetWeather
SearchCreativeWork
GetWeather
AddToPlaylist
PlayMusic
SearchScreeningEvent
SearchCreativeWork
GetWeather
AddToPlaylist
AddToPlaylist
AddToPlaylist
PlayMusic
GetWeather
SearchScreeningEvent
BookRestaurant
AddToPlaylist
GetWeather
RateBook
RateBook
AddToPlaylist
GetWeather
PlayMusic
SearchScreeningEvent
SearchScreeningEvent
SearchCreativeWork
SearchScreeningEvent
RateBook
SearchCreativeWork
SearchScreeningEvent
SearchScreeningEvent
BookRestaurant
SearchScreeningEvent
SearchScreeningEvent
SearchCreativeWork
SearchCreativeWork
SearchCreativeWork
AddToPlaylist
BookRestaurant
PlayMusic
BookRestaurant
PlayMusic
PlayMusic
BookRestaurant
AddToPlaylist
GetWeather
GetWeather
AddToPlaylist
SearchScreeningEvent
SearchCreativeWork
SearchCreativeWork
RateBook
RateBook
RateBook
RateBook
GetWeather
AddToPlaylist
BookRestaurant
RateBook
SearchCreativeWork
PlayMusic
AddToPlaylist
SearchCreativeWork
AddToPlaylist
GetWeather
RateBook
GetWeather
BookRestaurant
AddToPlaylist
BookRestaurant
PlayMusic
PlayMusic
SearchCreativeWork
AddToPlaylist
GetWeather
AddToPlaylist
PlayMusic
PlayMusic
RateBook
SearchCreativeWork
RateBook
GetWeather
AddToPlaylist
SearchScreeningEvent
BookRestaurant
PlayMusic
PlayMusic
RateBook
AddToPlaylist
SearchCreativeWork
PlayMusic
BookRestaurant
PlayMusic
GetWeather
SearchScreeningEvent
GetWeather
GetWeather
GetWeather
GetWeather
RateBook
RateBook
AddToPlaylist
SearchCreativeWork
AddToPlaylist
PlayMusic
BookRestaurant
SearchCreativeWork
BookRestaurant
SearchScreeningEvent
SearchScreeningEvent
BookRestaurant
PlayMusic
SearchScreeningEvent
SearchCreativeWork
GetWeather
GetWeather
RateBook
GetWeather
BookRestaurant
GetWeather
GetWeather
AddToPlaylist
GetWeather
SearchScreeningEvent
SearchScreeningEvent
AddToPlaylist
SearchScreeningEvent
BookRestaurant
PlayMusic
GetWeather
GetWeather
RateBook
SearchScreeningEvent
AddToPlaylist
PlayMusic
SearchCreativeWork
AddToPlaylist
GetWeather
RateBook
SearchScreeningEvent
AddToPlaylist
AddToPlaylist
RateBook
PlayMusic
GetWeather
AddToPlaylist
GetWeather
RateBook
SearchCreativeWork
AddToPlaylist
BookRestaurant
PlayMusic
AddToPlaylist
SearchScreeningEvent
RateBook
RateBook
SearchScreeningEvent
SearchCreativeWork
RateBook
PlayMusic
AddToPlaylist
SearchCreativeWork
GetWeather
SearchCreativeWork
SearchCreativeWork
RateBook
BookRestaurant
GetWeather
SearchScreeningEvent
AddToPlaylist
RateBook
SearchScreeningEvent
GetWeather
BookRestaurant
GetWeather
BookRestaurant
GetWeather
RateBook
GetWeather
SearchCreativeWork
SearchScreeningEvent
AddToPlaylist
AddToPlaylist
GetWeather
GetWeather
SearchScreeningEvent
PlayMusic
SearchScreeningEvent
PlayMusic
BookRestaurant
PlayMusic
SearchCreativeWork
SearchCreativeWork
BookRestaurant
GetWeather
RateBook
RateBook
PlayMusic
BookRestaurant
SearchCreativeWork
BookRestaurant
RateBook
BookRestaurant
GetWeather
BookRestaurant
BookRestaurant
SearchCreativeWork
PlayMusic
SearchCreativeWork
RateBook
AddToPlaylist
SearchCreativeWork
AddToPlaylist
SearchCreativeWork
SearchScreeningEvent
SearchScreeningEvent
SearchScreeningEvent
RateBook
BookRestaurant
RateBook
PlayMusic
BookRestaurant
GetWeather
PlayMusic
BookRestaurant
AddToPlaylist
PlayMusic
SearchScreeningEvent
SearchCreativeWork
RateBook
GetWeather
SearchScreeningEvent
GetWeather
RateBook
RateBook
GetWeather
PlayMusic
RateBook
RateBook
PlayMusic
PlayMusic
RateBook
SearchScreeningEvent
AddToPlaylist
SearchScreeningEvent
SearchCreativeWork
PlayMusic
PlayMusic
PlayMusic
RateBook
GetWeather
AddToPlaylist
BookRestaurant
RateBook
PlayMusic
GetWeather
SearchCreativeWork
PlayMusic
PlayMusic
PlayMusic
SearchCreativeWork
RateBook
SearchCreativeWork
GetWeather
GetWeather
RateBook
GetWeather
RateBook
GetWeather
PlayMusic
BookRestaurant
PlayMusic
PlayMusic
AddToPlaylist
AddToPlaylist
SearchScreeningEvent
GetWeather
SearchScreeningEvent
GetWeather
PlayMusic
GetWeather
BookRestaurant
SearchCreativeWork
BookRestaurant
RateBook
AddToPlaylist
AddToPlaylist
SearchScreeningEvent
RateBook
PlayMusic
AddToPlaylist
AddToPlaylist
AddToPlaylist
AddToPlaylist
SearchCreativeWork
PlayMusic
AddToPlaylist
RateBook
SearchScreeningEvent
SearchCreativeWork
AddToPlaylist
AddToPlaylist
SearchScreeningEvent
RateBook
PlayMusic
GetWeather
GetWeather
RateBook
SearchCreativeWork
BookRestaurant
AddToPlaylist
AddToPlaylist
SearchScreeningEvent
BookRestaurant
RateBook
GetWeather
SearchCreativeWork
BookRestaurant
PlayMusic
SearchScreeningEvent
RateBook
SearchCreativeWork
AddToPlaylist
GetWeather
SearchScreeningEvent
SearchCreativeWork
SearchScreeningEvent
GetWeather
BookRestaurant
GetWeather
GetWeather
AddToPlaylist
SearchCreativeWork
GetWeather
SearchCreativeWork
GetWeather
GetWeather
BookRestaurant
SearchCreativeWork
BookRestaurant
RateBook
BookRestaurant
SearchCreativeWork
SearchScreeningEvent
RateBook
PlayMusic
SearchCreativeWork
GetWeather
BookRestaurant
AddToPlaylist
SearchScreeningEvent
BookRestaurant
SearchCreativeWork
BookRestaurant
RateBook
SearchScreeningEvent
SearchCreativeWork
BookRestaurant
RateBook
SearchCreativeWork
PlayMusic
AddToPlaylist
BookRestaurant
SearchCreativeWork
SearchScreeningEvent
PlayMusic
BookRestaurant
SearchScreeningEvent
SearchScreeningEvent
SearchCreativeWork
RateBook
RateBook
SearchCreativeWork
SearchScreeningEvent
RateBook
SearchCreativeWork
RateBook
SearchScreeningEvent
GetWeather
SearchCreativeWork
RateBook
GetWeather
RateBook
BookRestaurant
BookRestaurant
AddToPlaylist
SearchScreeningEvent
SearchScreeningEvent
BookRestaurant
RateBook
RateBook
SearchScreeningEvent
GetWeather
PlayMusic
GetWeather
SearchCreativeWork
RateBook
SearchCreativeWork
AddToPlaylist
SearchCreativeWork
BookRestaurant
SearchScreeningEvent
PlayMusic
SearchScreeningEvent
SearchScreeningEvent
BookRestaurant
PlayMusic
PlayMusic
SearchCreativeWork
BookRestaurant
PlayMusic
AddToPlaylist
SearchCreativeWork
GetWeather
SearchCreativeWork
AddToPlaylist
SearchScreeningEvent
PlayMusic
PlayMusic
BookRestaurant
PlayMusic
BookRestaurant
RateBook
SearchScreeningEvent
AddToPlaylist
GetWeather
AddToPlaylist
RateBook
GetWeather
PlayMusic
PlayMusic
BookRestaurant
RateBook
BookRestaurant
BookRestaurant
RateBook
SearchCreativeWork
BookRestaurant
AddToPlaylist
AddToPlaylist
SearchScreeningEvent
PlayMusic
AddToPlaylist
SearchCreativeWork
AddToPlaylist
GetWeather
GetWeather
RateBook
SearchScreeningEvent
RateBook
RateBook
AddToPlaylist
SearchScreeningEvent
AddToPlaylist
SearchCreativeWork
GetWeather
BookRestaurant
AddToPlaylist
BookRestaurant
SearchCreativeWork
SearchScreeningEvent
RateBook
PlayMusic
SearchScreeningEvent
PlayMusic
RateBook
PlayMusic
PlayMusic
AddToPlaylist
PlayMusic
SearchScreeningEvent
GetWeather
SearchScreeningEvent
GetWeather
BookRestaurant
SearchScreeningEvent
SearchScreeningEvent
AddToPlaylist
SearchScreeningEvent
SearchScreeningEvent
SearchScreeningEvent
SearchCreativeWork
RateBook
RateBook
PlayMusic
GetWeather
RateBook
SearchScreeningEvent
SearchScreeningEvent
SearchCreativeWork
SearchCreativeWork
PlayMusic
RateBook
AddToPlaylist
SearchCreativeWork
GetWeather
BookRestaurant
RateBook
PlayMusic
SearchScreeningEvent
GetWeather
AddToPlaylist
BookRestaurant
GetWeather
PlayMusic
SearchCreativeWork
SearchCreativeWork
RateBook
SearchCreativeWork
SearchCreativeWork
SearchCreativeWork
SearchScreeningEvent
BookRestaurant
SearchScreeningEvent
RateBook
AddToPlaylist
SearchCreativeWork
RateBook
AddToPlaylist
GetWeather
PlayMusic
AddToPlaylist
RateBook
BookRestaurant
PlayMusic
RateBook
RateBook
RateBook
GetWeather
SearchCreativeWork
RateBook
AddToPlaylist
BookRestaurant
BookRestaurant
AddToPlaylist
GetWeather
SearchCreativeWork
SearchScreeningEvent
RateBook
PlayMusic
AddToPlaylist
SearchScreeningEvent
PlayMusic
RateBook
GetWeather
SearchCreativeWork
SearchCreativeWork
GetWeather
PlayMusic
AddToPlaylist
SearchCreativeWork
BookRestaurant
SearchScreeningEvent
SearchCreativeWork
PlayMusic
RateBook
AddToPlaylist
RateBook
SearchScreeningEvent
SearchCreativeWork
SearchCreativeWork
GetWeather
BookRestaurant
SearchScreeningEvent
PlayMusic
SearchCreativeWork
AddToPlaylist
AddToPlaylist
AddToPlaylist
SearchScreeningEvent
GetWeather
GetWeather
AddToPlaylist
PlayMusic
BookRestaurant
BookRestaurant
PlayMusic
BookRestaurant
SearchCreativeWork
SearchCreativeWork
PlayMusic
AddToPlaylist
SearchScreeningEvent
SearchCreativeWork
SearchScreeningEvent
BookRestaurant
SearchScreeningEvent
SearchScreeningEvent
SearchScreeningEvent
SearchCreativeWork
BookRestaurant
PlayMusic
PlayMusic
AddToPlaylist
PlayMusic
SearchCreativeWork
AddToPlaylist
SearchCreativeWork
SearchScreeningEvent
RateBook
SearchCreativeWork
PlayMusic
PlayMusic
RateBook
AddToPlaylist
SearchCreativeWork
PlayMusic
RateBook
AddToPlaylist
AddToPlaylist
SearchCreativeWork
AddToPlaylist
RateBook
SearchCreativeWork
AddToPlaylist
AddToPlaylist
AddToPlaylist
SearchScreeningEvent
SearchCreativeWork
BookRestaurant
BookRestaurant
PlayMusic
RateBook
SearchScreeningEvent
GetWeather
AddToPlaylist
RateBook
RateBook
GetWeather
AddToPlaylist
RateBook
RateBook
BookRestaurant
GetWeather
PlayMusic
GetWeather
GetWeather
BookRestaurant
BookRestaurant
GetWeather
SearchScreeningEvent
SearchScreeningEvent
SearchScreeningEvent
SearchScreeningEvent
GetWeather
SearchCreativeWork
RateBook
GetWeather
BookRestaurant
BookRestaurant
GetWeather
SearchScreeningEvent
RateBook
AddToPlaylist
RateBook
BookRestaurant
PlayMusic
RateBook
BookRestaurant
RateBook
PlayMusic
SearchScreeningEvent
RateBook
GetWeather
SearchScreeningEvent
PlayMusic
SearchCreativeWork
GetWeather
SearchScreeningEvent
PlayMusic
GetWeather
AddToPlaylist
GetWeather
RateBook
GetWeather
AddToPlaylist
GetWeather
GetWeather
BookRestaurant
SearchScreeningEvent
SearchScreeningEvent
RateBook
GetWeather
SearchCreativeWork
BookRestaurant
RateBook
PlayMusic
SearchCreativeWork
RateBook
SearchScreeningEvent
AddToPlaylist
AddToPlaylist
BookRestaurant
SearchCreativeWork
SearchScreeningEvent
PlayMusic
SearchScreeningEvent
SearchCreativeWork
RateBook
BookRestaurant
RateBook
GetWeather
GetWeather
PlayMusic
SearchCreativeWork
BookRestaurant
BookRestaurant
SearchCreativeWork
RateBook
SearchScreeningEvent
SearchScreeningEvent
GetWeather
GetWeather
SearchScreeningEvent
PlayMusic
AddToPlaylist
RateBook
SearchCreativeWork
PlayMusic
PlayMusic
AddToPlaylist
SearchScreeningEvent
GetWeather
GetWeather
BookRestaurant
SearchScreeningEvent
AddToPlaylist
PlayMusic
AddToPlaylist
SearchCreativeWork
GetWeather
BookRestaurant
RateBook
SearchScreeningEvent
PlayMusic
BookRestaurant
BookRestaurant
AddToPlaylist
SearchScreeningEvent
GetWeather
AddToPlaylist
GetWeather
RateBook
BookRestaurant
PlayMusic
RateBook
BookRestaurant
GetWeather
RateBook
PlayMusic
BookRestaurant
GetWeather
PlayMusic
GetWeather
GetWeather
AddToPlaylist
GetWeather
BookRestaurant
SearchCreativeWork
SearchCreativeWork
GetWeather
BookRestaurant
GetWeather
PlayMusic
AddToPlaylist
GetWeather
SearchCreativeWork
PlayMusic
BookRestaurant
AddToPlaylist
SearchScreeningEvent
BookRestaurant
RateBook
GetWeather
BookRestaurant
AddToPlaylist
SearchCreativeWork
AddToPlaylist
AddToPlaylist
AddToPlaylist
PlayMusic
PlayMusic
GetWeather
SearchScreeningEvent
SearchScreeningEvent
PlayMusic
AddToPlaylist
BookRestaurant
SearchCreativeWork
SearchScreeningEvent
SearchScreeningEvent
RateBook
GetWeather
AddToPlaylist
RateBook
RateBook
SearchScreeningEvent
SearchScreeningEvent
AddToPlaylist
SearchCreativeWork
AddToPlaylist
RateBook
SearchScreeningEvent
SearchScreeningEvent
BookRestaurant
AddToPlaylist
SearchScreeningEvent
AddToPlaylist
PlayMusic
AddToPlaylist
AddToPlaylist
AddToPlaylist
GetWeather
BookRestaurant
RateBook
GetWeather
AddToPlaylist
RateBook
BookRestaurant
BookRestaurant
PlayMusic
AddToPlaylist
BookRestaurant
AddToPlaylist
GetWeather
RateBook
AddToPlaylist
SearchScreeningEvent
RateBook
AddToPlaylist
SearchScreeningEvent
SearchCreativeWork
SearchScreeningEvent
PlayMusic
GetWeather
BookRestaurant
SearchCreativeWork
GetWeather
RateBook
AddToPlaylist
SearchScreeningEvent
SearchScreeningEvent
SearchScreeningEvent
SearchScreeningEvent
AddToPlaylist
SearchScreeningEvent
GetWeather
GetWeather
AddToPlaylist
GetWeather
RateBook
PlayMusic
AddToPlaylist
SearchCreativeWork
SearchCreativeWork
RateBook
GetWeather
SearchScreeningEvent
BookRestaurant
SearchScreeningEvent
AddToPlaylist
AddToPlaylist
SearchCreativeWork
SearchCreativeWork
RateBook
BookRestaurant
SearchScreeningEvent
PlayMusic
AddToPlaylist
RateBook
SearchCreativeWork
GetWeather
RateBook
GetWeather
RateBook
GetWeather
PlayMusic
PlayMusic
SearchScreeningEvent
GetWeather
SearchScreeningEvent
BookRestaurant
PlayMusic
SearchScreeningEvent
PlayMusic
RateBook
BookRestaurant
RateBook
GetWeather
RateBook
AddToPlaylist
GetWeather
GetWeather
PlayMusic
RateBook
RateBook
GetWeather
RateBook
BookRestaurant
BookRestaurant
BookRestaurant
RateBook
PlayMusic
SearchScreeningEvent
AddToPlaylist
GetWeather
RateBook
SearchCreativeWork
RateBook
GetWeather
BookRestaurant
RateBook
SearchCreativeWork
BookRestaurant
SearchScreeningEvent
GetWeather
SearchScreeningEvent
SearchCreativeWork
BookRestaurant
GetWeather
GetWeather
GetWeather
BookRestaurant
RateBook
AddToPlaylist
RateBook
BookRestaurant
PlayMusic
SearchCreativeWork
PlayMusic
SearchCreativeWork
SearchCreativeWork
GetWeather
GetWeather
GetWeather
AddToPlaylist
AddToPlaylist
BookRestaurant
GetWeather
RateBook
GetWeather
SearchScreeningEvent
BookRestaurant
BookRestaurant
GetWeather
RateBook
BookRestaurant
BookRestaurant
AddToPlaylist
BookRestaurant
SearchCreativeWork
RateBook
SearchScreeningEvent
PlayMusic
BookRestaurant
BookRestaurant
BookRestaurant
SearchCreativeWork
SearchScreeningEvent
GetWeather
RateBook
GetWeather
SearchScreeningEvent
PlayMusic
PlayMusic
GetWeather
PlayMusic
GetWeather
AddToPlaylist
PlayMusic
PlayMusic
RateBook
PlayMusic
PlayMusic
RateBook
PlayMusic
RateBook
PlayMusic
RateBook
RateBook
BookRestaurant
PlayMusic
GetWeather
AddToPlaylist
SearchCreativeWork
SearchCreativeWork
BookRestaurant
AddToPlaylist
RateBook
SearchCreativeWork
SearchScreeningEvent
PlayMusic
AddToPlaylist
BookRestaurant
SearchScreeningEvent
GetWeather
GetWeather
SearchScreeningEvent
PlayMusic
SearchScreeningEvent
SearchCreativeWork
SearchScreeningEvent
GetWeather
GetWeather
AddToPlaylist
SearchCreativeWork
SearchScreeningEvent
PlayMusic
AddToPlaylist
PlayMusic
SearchScreeningEvent
RateBook
GetWeather
SearchScreeningEvent
SearchCreativeWork
BookRestaurant
BookRestaurant
AddToPlaylist
BookRestaurant
SearchScreeningEvent
SearchScreeningEvent
AddToPlaylist
GetWeather
PlayMusic
GetWeather
SearchCreativeWork
AddToPlaylist
GetWeather
SearchScreeningEvent
RateBook
RateBook
AddToPlaylist
SearchCreativeWork
BookRestaurant
PlayMusic
GetWeather
GetWeather
RateBook
AddToPlaylist
PlayMusic
SearchCreativeWork
PlayMusic
PlayMusic
BookRestaurant
SearchScreeningEvent
PlayMusic
PlayMusic
SearchScreeningEvent
RateBook
SearchScreeningEvent
RateBook
SearchScreeningEvent
PlayMusic
PlayMusic
BookRestaurant
SearchCreativeWork
PlayMusic
SearchScreeningEvent
RateBook
BookRestaurant
SearchScreeningEvent
GetWeather
AddToPlaylist
AddToPlaylist
PlayMusic
BookRestaurant
PlayMusic
SearchScreeningEvent
GetWeather
SearchScreeningEvent
SearchCreativeWork
RateBook
SearchScreeningEvent
BookRestaurant
PlayMusic
RateBook
SearchScreeningEvent
RateBook
RateBook
AddToPlaylist
PlayMusic
AddToPlaylist
SearchCreativeWork
BookRestaurant
BookRestaurant
GetWeather
PlayMusic
GetWeather
SearchCreativeWork
PlayMusic
GetWeather
RateBook
BookRestaurant
SearchCreativeWork
BookRestaurant
GetWeather
SearchScreeningEvent
RateBook
RateBook
SearchCreativeWork
AddToPlaylist
BookRestaurant
SearchScreeningEvent
AddToPlaylist
GetWeather
SearchCreativeWork
GetWeather
PlayMusic
PlayMusic
SearchCreativeWork
GetWeather
AddToPlaylist
BookRestaurant
AddToPlaylist
SearchCreativeWork
RateBook
PlayMusic
GetWeather
SearchScreeningEvent
SearchScreeningEvent
GetWeather
RateBook
GetWeather
RateBook
GetWeather
RateBook
SearchScreeningEvent
BookRestaurant
GetWeather
BookRestaurant
BookRestaurant
SearchScreeningEvent
PlayMusic
SearchScreeningEvent
GetWeather
GetWeather
GetWeather
RateBook
SearchScreeningEvent
AddToPlaylist
PlayMusic
AddToPlaylist
GetWeather
AddToPlaylist
SearchCreativeWork
AddToPlaylist
BookRestaurant
RateBook
AddToPlaylist
BookRestaurant
PlayMusic
PlayMusic
AddToPlaylist
AddToPlaylist
BookRestaurant
PlayMusic
RateBook
SearchCreativeWork
SearchScreeningEvent
PlayMusic
RateBook
AddToPlaylist
GetWeather
SearchCreativeWork
PlayMusic
SearchScreeningEvent
AddToPlaylist
AddToPlaylist
PlayMusic
SearchScreeningEvent
GetWeather
SearchScreeningEvent
AddToPlaylist
PlayMusic
GetWeather
BookRestaurant
RateBook
SearchCreativeWork
GetWeather
SearchScreeningEvent
PlayMusic
SearchCreativeWork
SearchCreativeWork
SearchScreeningEvent
SearchCreativeWork
GetWeather
AddToPlaylist
BookRestaurant
SearchCreativeWork
PlayMusic
AddToPlaylist
RateBook
SearchScreeningEvent
RateBook
AddToPlaylist
SearchScreeningEvent
SearchScreeningEvent
SearchCreativeWork
RateBook
BookRestaurant
PlayMusic
AddToPlaylist
AddToPlaylist
SearchCreativeWork
GetWeather
SearchCreativeWork
RateBook
GetWeather
RateBook
PlayMusic
BookRestaurant
AddToPlaylist
GetWeather
PlayMusic
RateBook
SearchCreativeWork
SearchCreativeWork
PlayMusic
BookRestaurant
GetWeather
BookRestaurant
PlayMusic
SearchScreeningEvent
PlayMusic
AddToPlaylist
BookRestaurant
SearchCreativeWork
GetWeather
GetWeather
GetWeather
RateBook
SearchCreativeWork
SearchScreeningEvent
BookRestaurant
SearchCreativeWork
SearchScreeningEvent
BookRestaurant
PlayMusic
RateBook
RateBook
BookRestaurant
BookRestaurant
PlayMusic
AddToPlaylist
AddToPlaylist
RateBook
PlayMusic
GetWeather
AddToPlaylist
GetWeather
SearchCreativeWork
GetWeather
SearchCreativeWork
RateBook
AddToPlaylist
SearchCreativeWork
SearchScreeningEvent
RateBook
SearchCreativeWork
SearchCreativeWork
RateBook
AddToPlaylist
GetWeather
GetWeather
GetWeather
AddToPlaylist
SearchScreeningEvent
GetWeather
SearchCreativeWork
AddToPlaylist
SearchScreeningEvent
SearchScreeningEvent
SearchCreativeWork
AddToPlaylist
BookRestaurant
AddToPlaylist
GetWeather
RateBook
PlayMusic
RateBook
BookRestaurant
SearchScreeningEvent
PlayMusic
PlayMusic
PlayMusic
SearchCreativeWork
RateBook
SearchScreeningEvent
SearchCreativeWork
GetWeather
BookRestaurant
BookRestaurant
GetWeather
SearchScreeningEvent
BookRestaurant
SearchScreeningEvent
PlayMusic
AddToPlaylist
RateBook
SearchCreativeWork
RateBook
SearchCreativeWork
GetWeather
AddToPlaylist
AddToPlaylist
SearchScreeningEvent
BookRestaurant
SearchScreeningEvent
SearchScreeningEvent
SearchScreeningEvent
SearchCreativeWork
SearchScreeningEvent
PlayMusic
RateBook
SearchScreeningEvent
AddToPlaylist
SearchScreeningEvent
BookRestaurant
GetWeather
SearchCreativeWork
RateBook
SearchCreativeWork
GetWeather
PlayMusic
BookRestaurant
RateBook
BookRestaurant
SearchCreativeWork
SearchCreativeWork
BookRestaurant
GetWeather
PlayMusic
PlayMusic
BookRestaurant
SearchScreeningEvent
SearchScreeningEvent
SearchCreativeWork
SearchCreativeWork
SearchScreeningEvent
GetWeather
SearchScreeningEvent
RateBook
SearchCreativeWork
GetWeather
BookRestaurant
SearchScreeningEvent
BookRestaurant
BookRestaurant
SearchScreeningEvent
BookRestaurant
AddToPlaylist
RateBook
PlayMusic
RateBook
RateBook
BookRestaurant
GetWeather
PlayMusic
PlayMusic
SearchScreeningEvent
PlayMusic
GetWeather
GetWeather
GetWeather
SearchCreativeWork
SearchCreativeWork
PlayMusic
RateBook
PlayMusic
SearchCreativeWork
SearchScreeningEvent
PlayMusic
SearchScreeningEvent
PlayMusic
RateBook
RateBook
BookRestaurant
AddToPlaylist
AddToPlaylist
SearchCreativeWork
RateBook
GetWeather
RateBook
SearchCreativeWork
RateBook
RateBook
SearchScreeningEvent
RateBook
GetWeather
AddToPlaylist
RateBook
RateBook
SearchScreeningEvent
GetWeather
GetWeather
SearchCreativeWork
GetWeather
SearchCreativeWork
SearchCreativeWork
BookRestaurant
RateBook
GetWeather
RateBook
GetWeather
SearchCreativeWork
RateBook
AddToPlaylist
GetWeather
SearchScreeningEvent
RateBook
SearchScreeningEvent
GetWeather
AddToPlaylist
AddToPlaylist
RateBook
SearchScreeningEvent
PlayMusic
RateBook
BookRestaurant
SearchScreeningEvent
PlayMusic
BookRestaurant
AddToPlaylist
SearchCreativeWork
SearchScreeningEvent
BookRestaurant
RateBook
SearchCreativeWork
SearchScreeningEvent
RateBook
SearchCreativeWork
SearchScreeningEvent
GetWeather
SearchScreeningEvent
RateBook
SearchCreativeWork
SearchScreeningEvent
SearchScreeningEvent
PlayMusic
AddToPlaylist
SearchScreeningEvent
PlayMusic
RateBook
GetWeather
PlayMusic
PlayMusic
SearchCreativeWork
GetWeather
SearchCreativeWork
SearchScreeningEvent
BookRestaurant
AddToPlaylist
RateBook
PlayMusic
RateBook
PlayMusic
BookRestaurant
AddToPlaylist
BookRestaurant
SearchScreeningEvent
BookRestaurant
RateBook
SearchCreativeWork
RateBook
SearchCreativeWork
PlayMusic
SearchCreativeWork
PlayMusic
SearchScreeningEvent
SearchScreeningEvent
BookRestaurant
SearchCreativeWork
SearchCreativeWork
SearchCreativeWork
RateBook
SearchCreativeWork
PlayMusic
GetWeather
RateBook
GetWeather
SearchCreativeWork
PlayMusic
GetWeather
GetWeather
BookRestaurant
GetWeather
RateBook
PlayMusic
AddToPlaylist
AddToPlaylist
SearchCreativeWork
PlayMusic
BookRestaurant
BookRestaurant
PlayMusic
AddToPlaylist
BookRestaurant
GetWeather
GetWeather
PlayMusic
SearchScreeningEvent
SearchCreativeWork
AddToPlaylist
PlayMusic
PlayMusic
BookRestaurant
AddToPlaylist
BookRestaurant
PlayMusic
BookRestaurant
PlayMusic
RateBook
AddToPlaylist
SearchCreativeWork
SearchCreativeWork
PlayMusic
RateBook
BookRestaurant
GetWeather
BookRestaurant
BookRestaurant
PlayMusic
BookRestaurant
GetWeather
RateBook
GetWeather
AddToPlaylist
SearchCreativeWork
RateBook
SearchCreativeWork
SearchCreativeWork
RateBook
AddToPlaylist
PlayMusic
AddToPlaylist
RateBook
AddToPlaylist
GetWeather
AddToPlaylist
SearchScreeningEvent
PlayMusic
GetWeather
SearchCreativeWork
RateBook
SearchScreeningEvent
SearchScreeningEvent
SearchScreeningEvent
PlayMusic
PlayMusic
SearchScreeningEvent
SearchScreeningEvent
RateBook
SearchCreativeWork
AddToPlaylist
GetWeather
PlayMusic
AddToPlaylist
RateBook
SearchScreeningEvent
SearchCreativeWork
GetWeather
RateBook
AddToPlaylist
GetWeather
BookRestaurant
SearchCreativeWork
SearchScreeningEvent
BookRestaurant
PlayMusic
SearchCreativeWork
PlayMusic
RateBook
GetWeather
PlayMusic
SearchCreativeWork
AddToPlaylist
AddToPlaylist
RateBook
AddToPlaylist
BookRestaurant
AddToPlaylist
AddToPlaylist
GetWeather
PlayMusic
AddToPlaylist
PlayMusic
AddToPlaylist
PlayMusic
SearchCreativeWork
GetWeather
BookRestaurant
RateBook
SearchScreeningEvent
AddToPlaylist
PlayMusic
GetWeather
BookRestaurant
SearchScreeningEvent
RateBook
PlayMusic
BookRestaurant
PlayMusic
AddToPlaylist
PlayMusic
GetWeather
GetWeather
RateBook
SearchScreeningEvent
SearchScreeningEvent
PlayMusic
RateBook
AddToPlaylist
RateBook
BookRestaurant
GetWeather
SearchCreativeWork
SearchCreativeWork
RateBook
GetWeather
AddToPlaylist
GetWeather
PlayMusic
AddToPlaylist
SearchScreeningEvent
PlayMusic
AddToPlaylist
AddToPlaylist
RateBook
PlayMusic
SearchScreeningEvent
RateBook
BookRestaurant
BookRestaurant
PlayMusic
AddToPlaylist
SearchCreativeWork
GetWeather
AddToPlaylist
AddToPlaylist
GetWeather
SearchScreeningEvent
AddToPlaylist
SearchScreeningEvent
SearchScreeningEvent
RateBook
PlayMusic
GetWeather
SearchCreativeWork
RateBook
RateBook
RateBook
SearchCreativeWork
PlayMusic
GetWeather
SearchScreeningEvent
AddToPlaylist
PlayMusic
BookRestaurant
SearchCreativeWork
PlayMusic
RateBook
SearchCreativeWork
BookRestaurant
RateBook
AddToPlaylist
PlayMusic
PlayMusic
SearchScreeningEvent
AddToPlaylist
GetWeather
PlayMusic
BookRestaurant
SearchScreeningEvent
AddToPlaylist
SearchScreeningEvent
SearchCreativeWork
RateBook
SearchScreeningEvent
PlayMusic
SearchCreativeWork
AddToPlaylist
SearchCreativeWork
SearchScreeningEvent
PlayMusic
BookRestaurant
BookRestaurant
SearchScreeningEvent
RateBook
BookRestaurant
PlayMusic
RateBook
BookRestaurant
SearchScreeningEvent
SearchCreativeWork
BookRestaurant
SearchCreativeWork
GetWeather
SearchCreativeWork
SearchCreativeWork
SearchCreativeWork
RateBook
BookRestaurant
GetWeather
RateBook
GetWeather
GetWeather
BookRestaurant
GetWeather
RateBook
BookRestaurant
BookRestaurant
GetWeather
SearchScreeningEvent
AddToPlaylist
RateBook
SearchScreeningEvent
SearchCreativeWork
RateBook
AddToPlaylist
RateBook
SearchCreativeWork
PlayMusic
AddToPlaylist
RateBook
AddToPlaylist
AddToPlaylist
SearchScreeningEvent
GetWeather
SearchCreativeWork
SearchCreativeWork
GetWeather
RateBook
BookRestaurant
SearchCreativeWork
AddToPlaylist
PlayMusic
BookRestaurant
RateBook
GetWeather
RateBook
GetWeather
SearchScreeningEvent
BookRestaurant
RateBook
BookRestaurant
BookRestaurant
PlayMusic
SearchCreativeWork
GetWeather
AddToPlaylist
PlayMusic
SearchCreativeWork
BookRestaurant
SearchScreeningEvent
SearchCreativeWork
BookRestaurant
SearchCreativeWork
PlayMusic
SearchCreativeWork
SearchCreativeWork
PlayMusic
BookRestaurant
AddToPlaylist
GetWeather
GetWeather
AddToPlaylist
AddToPlaylist
AddToPlaylist
BookRestaurant
RateBook
AddToPlaylist
GetWeather
SearchCreativeWork
BookRestaurant
SearchScreeningEvent
GetWeather
GetWeather
SearchCreativeWork
PlayMusic
SearchCreativeWork
BookRestaurant
RateBook
BookRestaurant
SearchCreativeWork
BookRestaurant
PlayMusic
RateBook
AddToPlaylist
PlayMusic
GetWeather
SearchCreativeWork
PlayMusic
PlayMusic
AddToPlaylist
RateBook
SearchScreeningEvent
BookRestaurant
PlayMusic
RateBook
BookRestaurant
SearchCreativeWork
GetWeather
SearchScreeningEvent
RateBook
RateBook
AddToPlaylist
SearchCreativeWork
PlayMusic
BookRestaurant
AddToPlaylist
SearchScreeningEvent
RateBook
PlayMusic
PlayMusic
RateBook
AddToPlaylist
PlayMusic
BookRestaurant
GetWeather
SearchScreeningEvent
AddToPlaylist
SearchScreeningEvent
AddToPlaylist
RateBook
PlayMusic
BookRestaurant
GetWeather
AddToPlaylist
RateBook
BookRestaurant
SearchCreativeWork
AddToPlaylist
BookRestaurant
BookRestaurant
AddToPlaylist
BookRestaurant
AddToPlaylist
RateBook
SearchScreeningEvent
SearchScreeningEvent
GetWeather
AddToPlaylist
SearchScreeningEvent
AddToPlaylist
RateBook
RateBook
SearchScreeningEvent
RateBook
BookRestaurant
AddToPlaylist
PlayMusic
BookRestaurant
GetWeather
SearchCreativeWork
AddToPlaylist
AddToPlaylist
SearchCreativeWork
BookRestaurant
SearchScreeningEvent
PlayMusic
SearchScreeningEvent
SearchScreeningEvent
BookRestaurant
SearchCreativeWork
PlayMusic
PlayMusic
PlayMusic
AddToPlaylist
AddToPlaylist
GetWeather
SearchCreativeWork
PlayMusic
AddToPlaylist
PlayMusic
RateBook
GetWeather
RateBook
SearchScreeningEvent
BookRestaurant
SearchCreativeWork
RateBook
PlayMusic
SearchCreativeWork
RateBook
AddToPlaylist
SearchScreeningEvent
AddToPlaylist
AddToPlaylist
SearchScreeningEvent
PlayMusic
BookRestaurant
BookRestaurant
AddToPlaylist
SearchScreeningEvent
PlayMusic
BookRestaurant
BookRestaurant
GetWeather
RateBook
SearchScreeningEvent
BookRestaurant
AddToPlaylist
PlayMusic
PlayMusic
PlayMusic
SearchScreeningEvent
BookRestaurant
AddToPlaylist
GetWeather
AddToPlaylist
SearchScreeningEvent
AddToPlaylist
RateBook
RateBook
SearchCreativeWork
SearchCreativeWork
RateBook
BookRestaurant
SearchCreativeWork
AddToPlaylist
RateBook
SearchScreeningEvent
SearchScreeningEvent
SearchScreeningEvent
SearchCreativeWork
RateBook
SearchCreativeWork
AddToPlaylist
SearchScreeningEvent
SearchScreeningEvent
GetWeather
GetWeather
SearchCreativeWork
GetWeather
PlayMusic
RateBook
SearchScreeningEvent
BookRestaurant
SearchScreeningEvent
SearchScreeningEvent
RateBook
BookRestaurant
GetWeather
RateBook
RateBook
AddToPlaylist
RateBook
AddToPlaylist
SearchScreeningEvent
PlayMusic
SearchScreeningEvent
GetWeather
GetWeather
GetWeather
SearchCreativeWork
PlayMusic
SearchScreeningEvent
PlayMusic
BookRestaurant
RateBook
AddToPlaylist
BookRestaurant
AddToPlaylist
BookRestaurant
SearchScreeningEvent
RateBook
AddToPlaylist
SearchScreeningEvent
GetWeather
AddToPlaylist
BookRestaurant
SearchScreeningEvent
BookRestaurant
GetWeather
SearchCreativeWork
GetWeather
PlayMusic
SearchCreativeWork
GetWeather
AddToPlaylist
RateBook
RateBook
SearchCreativeWork
PlayMusic
PlayMusic
SearchScreeningEvent
RateBook
SearchCreativeWork
BookRestaurant
RateBook
AddToPlaylist
SearchCreativeWork
PlayMusic
SearchScreeningEvent
SearchCreativeWork
RateBook
GetWeather
SearchScreeningEvent
SearchCreativeWork
BookRestaurant
SearchCreativeWork
RateBook
BookRestaurant
SearchCreativeWork
SearchCreativeWork
BookRestaurant
GetWeather
PlayMusic
SearchScreeningEvent
AddToPlaylist
RateBook
SearchCreativeWork
BookRestaurant
BookRestaurant
SearchCreativeWork
GetWeather
PlayMusic
BookRestaurant
PlayMusic
AddToPlaylist
SearchCreativeWork
BookRestaurant
BookRestaurant
RateBook
PlayMusic
AddToPlaylist
SearchCreativeWork
SearchCreativeWork
SearchScreeningEvent
RateBook
RateBook
BookRestaurant
SearchScreeningEvent
SearchCreativeWork
SearchCreativeWork
RateBook
AddToPlaylist
PlayMusic
AddToPlaylist
SearchScreeningEvent
GetWeather
SearchScreeningEvent
PlayMusic
PlayMusic
SearchCreativeWork
GetWeather
PlayMusic
SearchScreeningEvent
GetWeather
AddToPlaylist
BookRestaurant
SearchScreeningEvent
BookRestaurant
SearchScreeningEvent
RateBook
RateBook
GetWeather
BookRestaurant
RateBook
RateBook
PlayMusic
AddToPlaylist
GetWeather
BookRestaurant
PlayMusic
AddToPlaylist
SearchScreeningEvent
SearchScreeningEvent
AddToPlaylist
GetWeather
SearchCreativeWork
PlayMusic
BookRestaurant
GetWeather
BookRestaurant
AddToPlaylist
RateBook
SearchCreativeWork
SearchScreeningEvent
BookRestaurant
SearchScreeningEvent
AddToPlaylist
PlayMusic
SearchScreeningEvent
RateBook
RateBook
SearchScreeningEvent
BookRestaurant
AddToPlaylist
BookRestaurant
GetWeather
SearchCreativeWork
RateBook
GetWeather
RateBook
PlayMusic
BookRestaurant
RateBook
GetWeather
BookRestaurant
SearchScreeningEvent
RateBook
SearchCreativeWork
AddToPlaylist
AddToPlaylist
AddToPlaylist
SearchCreativeWork
AddToPlaylist
PlayMusic
PlayMusic
RateBook
GetWeather
AddToPlaylist
GetWeather
GetWeather
SearchCreativeWork
AddToPlaylist
BookRestaurant
GetWeather
PlayMusic
GetWeather
SearchCreativeWork
SearchCreativeWork
SearchScreeningEvent
PlayMusic
GetWeather
SearchCreativeWork
AddToPlaylist
AddToPlaylist
BookRestaurant
BookRestaurant
AddToPlaylist
RateBook
GetWeather
RateBook
PlayMusic
AddToPlaylist
AddToPlaylist
GetWeather
GetWeather
SearchCreativeWork
SearchScreeningEvent
BookRestaurant
SearchCreativeWork
SearchScreeningEvent
SearchScreeningEvent
AddToPlaylist
PlayMusic
RateBook
PlayMusic
SearchScreeningEvent
RateBook
PlayMusic
PlayMusic
BookRestaurant
SearchScreeningEvent
GetWeather
PlayMusic
BookRestaurant
SearchCreativeWork
PlayMusic
SearchCreativeWork
SearchCreativeWork
PlayMusic
RateBook
SearchScreeningEvent
SearchCreativeWork
RateBook
AddToPlaylist
BookRestaurant
SearchCreativeWork
SearchCreativeWork
SearchCreativeWork
BookRestaurant
GetWeather
AddToPlaylist
GetWeather
SearchCreativeWork
SearchCreativeWork
PlayMusic
BookRestaurant
PlayMusic
BookRestaurant
RateBook
RateBook
RateBook
BookRestaurant
SearchCreativeWork
BookRestaurant
AddToPlaylist
PlayMusic
SearchScreeningEvent
RateBook
PlayMusic
BookRestaurant
SearchCreativeWork
PlayMusic
SearchScreeningEvent
SearchScreeningEvent
BookRestaurant
PlayMusic
GetWeather
RateBook
RateBook
PlayMusic
SearchScreeningEvent
BookRestaurant
PlayMusic
AddToPlaylist
GetWeather
PlayMusic
RateBook
PlayMusic
BookRestaurant
SearchCreativeWork
SearchCreativeWork
AddToPlaylist
PlayMusic
SearchScreeningEvent
RateBook
BookRestaurant
PlayMusic
AddToPlaylist
AddToPlaylist
PlayMusic
SearchCreativeWork
PlayMusic
RateBook
RateBook
AddToPlaylist
GetWeather
AddToPlaylist
AddToPlaylist
BookRestaurant
SearchCreativeWork
GetWeather
PlayMusic
SearchScreeningEvent
SearchCreativeWork
AddToPlaylist
AddToPlaylist
SearchCreativeWork
PlayMusic
GetWeather
RateBook
SearchScreeningEvent
RateBook
AddToPlaylist
PlayMusic
GetWeather
RateBook
SearchScreeningEvent
RateBook
RateBook
GetWeather
SearchCreativeWork
SearchScreeningEvent
AddToPlaylist
SearchScreeningEvent
GetWeather
PlayMusic
RateBook
BookRestaurant
RateBook
SearchScreeningEvent
BookRestaurant
AddToPlaylist
SearchCreativeWork
AddToPlaylist
RateBook
SearchScreeningEvent
SearchCreativeWork
RateBook
RateBook
BookRestaurant
GetWeather
SearchCreativeWork
PlayMusic
PlayMusic
PlayMusic
AddToPlaylist
PlayMusic
RateBook
SearchCreativeWork
SearchScreeningEvent
AddToPlaylist
SearchCreativeWork
SearchCreativeWork
PlayMusic
AddToPlaylist
GetWeather
SearchCreativeWork
BookRestaurant
PlayMusic
SearchScreeningEvent
GetWeather
BookRestaurant
AddToPlaylist
GetWeather
RateBook
SearchScreeningEvent
SearchCreativeWork
GetWeather
SearchCreativeWork
GetWeather
SearchCreativeWork
SearchCreativeWork
PlayMusic
RateBook
AddToPlaylist
AddToPlaylist
SearchCreativeWork
RateBook
RateBook
AddToPlaylist
AddToPlaylist
AddToPlaylist
GetWeather
AddToPlaylist
BookRestaurant
SearchScreeningEvent
PlayMusic
PlayMusic
GetWeather
GetWeather
GetWeather
AddToPlaylist
BookRestaurant
SearchScreeningEvent
SearchCreativeWork
AddToPlaylist
PlayMusic
GetWeather
RateBook
SearchScreeningEvent
PlayMusic
SearchScreeningEvent
SearchScreeningEvent
AddToPlaylist
SearchScreeningEvent
SearchCreativeWork
RateBook
AddToPlaylist
SearchCreativeWork
AddToPlaylist
BookRestaurant
RateBook
AddToPlaylist
AddToPlaylist
BookRestaurant
RateBook
BookRestaurant
PlayMusic
SearchCreativeWork
RateBook
BookRestaurant
BookRestaurant
SearchCreativeWork
BookRestaurant
PlayMusic
AddToPlaylist
AddToPlaylist
BookRestaurant
BookRestaurant
SearchCreativeWork
BookRestaurant
RateBook
AddToPlaylist
SearchScreeningEvent
GetWeather
PlayMusic
SearchScreeningEvent
SearchScreeningEvent
BookRestaurant
SearchCreativeWork
RateBook
SearchScreeningEvent
AddToPlaylist
RateBook
PlayMusic
PlayMusic
SearchCreativeWork
GetWeather
SearchCreativeWork
RateBook
GetWeather
GetWeather
RateBook
PlayMusic
BookRestaurant
AddToPlaylist
SearchCreativeWork
GetWeather
RateBook
RateBook
BookRestaurant
BookRestaurant
SearchScreeningEvent
RateBook
AddToPlaylist
PlayMusic
BookRestaurant
RateBook
SearchScreeningEvent
AddToPlaylist
PlayMusic
RateBook
AddToPlaylist
SearchCreativeWork
BookRestaurant
PlayMusic
PlayMusic
SearchScreeningEvent
AddToPlaylist
RateBook
AddToPlaylist
SearchScreeningEvent
SearchCreativeWork
BookRestaurant
BookRestaurant
BookRestaurant
RateBook
SearchCreativeWork
BookRestaurant
RateBook
BookRestaurant
GetWeather
AddToPlaylist
RateBook
AddToPlaylist
PlayMusic
AddToPlaylist
BookRestaurant
GetWeather
SearchCreativeWork
PlayMusic
SearchCreativeWork
SearchScreeningEvent
RateBook
RateBook
AddToPlaylist
BookRestaurant
PlayMusic
SearchCreativeWork
SearchCreativeWork
PlayMusic
AddToPlaylist
AddToPlaylist
GetWeather
RateBook
BookRestaurant
SearchScreeningEvent
AddToPlaylist
PlayMusic
AddToPlaylist
AddToPlaylist
SearchCreativeWork
BookRestaurant
SearchScreeningEvent
GetWeather
GetWeather
SearchScreeningEvent
AddToPlaylist
RateBook
GetWeather
PlayMusic
RateBook
AddToPlaylist
AddToPlaylist
BookRestaurant
GetWeather
BookRestaurant
PlayMusic
SearchScreeningEvent
SearchScreeningEvent
AddToPlaylist
RateBook
RateBook
GetWeather
PlayMusic
GetWeather
BookRestaurant
RateBook
PlayMusic
BookRestaurant
PlayMusic
SearchScreeningEvent
PlayMusic
GetWeather
RateBook
GetWeather
PlayMusic
PlayMusic
AddToPlaylist
AddToPlaylist
RateBook
AddToPlaylist
PlayMusic
BookRestaurant
SearchScreeningEvent
SearchScreeningEvent
GetWeather
SearchScreeningEvent
SearchScreeningEvent
GetWeather
BookRestaurant
RateBook
SearchScreeningEvent
BookRestaurant
BookRestaurant
BookRestaurant
RateBook
AddToPlaylist
GetWeather
PlayMusic
PlayMusic
AddToPlaylist
AddToPlaylist
AddToPlaylist
GetWeather
RateBook
SearchScreeningEvent
BookRestaurant
BookRestaurant
RateBook
GetWeather
SearchCreativeWork
AddToPlaylist
PlayMusic
SearchCreativeWork
SearchCreativeWork
RateBook
SearchScreeningEvent
RateBook
GetWeather
BookRestaurant
PlayMusic
GetWeather
SearchCreativeWork
SearchScreeningEvent
PlayMusic
GetWeather
PlayMusic
AddToPlaylist
PlayMusic
SearchScreeningEvent
BookRestaurant
SearchCreativeWork
GetWeather
BookRestaurant
AddToPlaylist
SearchScreeningEvent
SearchScreeningEvent
RateBook
GetWeather
BookRestaurant
GetWeather
AddToPlaylist
SearchScreeningEvent
SearchCreativeWork
GetWeather
SearchScreeningEvent
AddToPlaylist
SearchScreeningEvent
BookRestaurant
BookRestaurant
RateBook
RateBook
BookRestaurant
SearchCreativeWork
BookRestaurant
SearchCreativeWork
SearchCreativeWork
BookRestaurant
PlayMusic
SearchCreativeWork
RateBook
BookRestaurant
RateBook
AddToPlaylist
AddToPlaylist
GetWeather
SearchCreativeWork
GetWeather
SearchCreativeWork
SearchCreativeWork
RateBook
GetWeather
PlayMusic
AddToPlaylist
GetWeather
PlayMusic
PlayMusic
PlayMusic
SearchScreeningEvent
SearchScreeningEvent
RateBook
SearchScreeningEvent
BookRestaurant
RateBook
SearchCreativeWork
PlayMusic
PlayMusic
SearchScreeningEvent
BookRestaurant
RateBook
SearchScreeningEvent
AddToPlaylist
PlayMusic
AddToPlaylist
AddToPlaylist
SearchCreativeWork
SearchScreeningEvent
GetWeather
PlayMusic
AddToPlaylist
PlayMusic
RateBook
AddToPlaylist
GetWeather
RateBook
SearchScreeningEvent
BookRestaurant
SearchScreeningEvent
BookRestaurant
BookRestaurant
AddToPlaylist
PlayMusic
BookRestaurant
SearchCreativeWork
PlayMusic
GetWeather
BookRestaurant
SearchScreeningEvent
PlayMusic
AddToPlaylist
SearchScreeningEvent
AddToPlaylist
AddToPlaylist
AddToPlaylist
BookRestaurant
PlayMusic
BookRestaurant
PlayMusic
PlayMusic
AddToPlaylist
BookRestaurant
SearchScreeningEvent
BookRestaurant
PlayMusic
SearchScreeningEvent
GetWeather
GetWeather
RateBook
PlayMusic
RateBook
RateBook
SearchScreeningEvent
BookRestaurant
PlayMusic
BookRestaurant
SearchCreativeWork
GetWeather
PlayMusic
BookRestaurant
GetWeather
RateBook
PlayMusic
SearchCreativeWork
PlayMusic
RateBook
SearchCreativeWork
GetWeather
GetWeather
SearchCreativeWork
GetWeather
AddToPlaylist
RateBook
GetWeather
BookRestaurant
BookRestaurant
GetWeather
PlayMusic
PlayMusic
BookRestaurant
BookRestaurant
SearchScreeningEvent
GetWeather
AddToPlaylist
SearchScreeningEvent
BookRestaurant
BookRestaurant
RateBook
SearchCreativeWork
GetWeather
AddToPlaylist
SearchCreativeWork
GetWeather
AddToPlaylist
PlayMusic
BookRestaurant
SearchScreeningEvent
SearchCreativeWork
BookRestaurant
RateBook
AddToPlaylist
SearchCreativeWork
PlayMusic
PlayMusic
SearchCreativeWork
PlayMusic
AddToPlaylist
GetWeather
GetWeather
BookRestaurant
GetWeather
SearchScreeningEvent
SearchCreativeWork
BookRestaurant
SearchCreativeWork
SearchScreeningEvent
PlayMusic
BookRestaurant
AddToPlaylist
SearchScreeningEvent
SearchCreativeWork
AddToPlaylist
PlayMusic
BookRestaurant
PlayMusic
PlayMusic
PlayMusic
SearchCreativeWork
GetWeather
SearchCreativeWork
AddToPlaylist
SearchScreeningEvent
SearchScreeningEvent
SearchScreeningEvent
AddToPlaylist
PlayMusic
PlayMusic
BookRestaurant
GetWeather
PlayMusic
BookRestaurant
GetWeather
RateBook
RateBook
BookRestaurant
BookRestaurant
BookRestaurant
PlayMusic
SearchScreeningEvent
GetWeather
AddToPlaylist
AddToPlaylist
SearchCreativeWork
PlayMusic
AddToPlaylist
BookRestaurant
SearchScreeningEvent
BookRestaurant
PlayMusic
GetWeather
BookRestaurant
SearchCreativeWork
PlayMusic
SearchCreativeWork
RateBook
GetWeather
SearchScreeningEvent
GetWeather
PlayMusic
SearchCreativeWork
AddToPlaylist
SearchCreativeWork
GetWeather
GetWeather
GetWeather
RateBook
AddToPlaylist
RateBook
GetWeather
GetWeather
SearchScreeningEvent
AddToPlaylist
GetWeather
AddToPlaylist
BookRestaurant
PlayMusic
BookRestaurant
RateBook
SearchScreeningEvent
PlayMusic
RateBook
SearchCreativeWork
BookRestaurant
RateBook
AddToPlaylist
PlayMusic
BookRestaurant
BookRestaurant
PlayMusic
PlayMusic
AddToPlaylist
RateBook
SearchCreativeWork
AddToPlaylist
SearchScreeningEvent
SearchCreativeWork
SearchScreeningEvent
PlayMusic
RateBook
GetWeather
GetWeather
RateBook
PlayMusic
PlayMusic
BookRestaurant
SearchScreeningEvent
PlayMusic
GetWeather
BookRestaurant
SearchScreeningEvent
SearchCreativeWork
SearchCreativeWork
BookRestaurant
SearchCreativeWork
BookRestaurant
BookRestaurant
BookRestaurant
PlayMusic
GetWeather
RateBook
GetWeather
SearchCreativeWork
SearchCreativeWork
RateBook
BookRestaurant
AddToPlaylist
AddToPlaylist
AddToPlaylist
BookRestaurant
PlayMusic
AddToPlaylist
PlayMusic
BookRestaurant
RateBook
GetWeather
BookRestaurant
GetWeather
SearchScreeningEvent
BookRestaurant
GetWeather
SearchScreeningEvent
RateBook
SearchScreeningEvent
BookRestaurant
AddToPlaylist
GetWeather
BookRestaurant
PlayMusic
GetWeather
SearchCreativeWork
SearchScreeningEvent
AddToPlaylist
SearchScreeningEvent
SearchCreativeWork
RateBook
AddToPlaylist
SearchCreativeWork
PlayMusic
SearchCreativeWork
PlayMusic
GetWeather
SearchScreeningEvent
AddToPlaylist
PlayMusic
SearchCreativeWork
SearchCreativeWork
PlayMusic
PlayMusic
RateBook
PlayMusic
PlayMusic
BookRestaurant
PlayMusic
SearchScreeningEvent
GetWeather
BookRestaurant
SearchScreeningEvent
RateBook
BookRestaurant
AddToPlaylist
SearchCreativeWork
RateBook
BookRestaurant
GetWeather
SearchCreativeWork
SearchCreativeWork
SearchCreativeWork
PlayMusic
AddToPlaylist
AddToPlaylist
BookRestaurant
AddToPlaylist
AddToPlaylist
RateBook
SearchScreeningEvent
PlayMusic
RateBook
RateBook
RateBook
SearchScreeningEvent
BookRestaurant
AddToPlaylist
SearchCreativeWork
SearchScreeningEvent
RateBook
RateBook
SearchCreativeWork
SearchScreeningEvent
BookRestaurant
SearchScreeningEvent
SearchCreativeWork
SearchScreeningEvent
SearchScreeningEvent
BookRestaurant
GetWeather
AddToPlaylist
GetWeather
GetWeather
SearchCreativeWork
BookRestaurant
BookRestaurant
AddToPlaylist
SearchCreativeWork
AddToPlaylist
BookRestaurant
PlayMusic
AddToPlaylist
SearchCreativeWork
PlayMusic
PlayMusic
BookRestaurant
BookRestaurant
SearchScreeningEvent
GetWeather
PlayMusic
SearchScreeningEvent
GetWeather
RateBook
GetWeather
PlayMusic
PlayMusic
BookRestaurant
BookRestaurant
PlayMusic
SearchCreativeWork
PlayMusic
SearchCreativeWork
BookRestaurant
SearchCreativeWork
SearchScreeningEvent
SearchScreeningEvent
GetWeather
GetWeather
SearchScreeningEvent
SearchScreeningEvent
GetWeather
GetWeather
SearchCreativeWork
BookRestaurant
SearchScreeningEvent
RateBook
PlayMusic
GetWeather
SearchCreativeWork
BookRestaurant
GetWeather
GetWeather
BookRestaurant
SearchScreeningEvent
AddToPlaylist
AddToPlaylist
RateBook
GetWeather
SearchCreativeWork
RateBook
PlayMusic
SearchCreativeWork
GetWeather
SearchScreeningEvent
BookRestaurant
RateBook
RateBook
GetWeather
SearchCreativeWork
SearchScreeningEvent
AddToPlaylist
SearchCreativeWork
BookRestaurant
PlayMusic
PlayMusic
PlayMusic
PlayMusic
SearchScreeningEvent
GetWeather
GetWeather
GetWeather
RateBook
GetWeather
AddToPlaylist
SearchCreativeWork
GetWeather
PlayMusic
BookRestaurant
PlayMusic
PlayMusic
RateBook
BookRestaurant
SearchScreeningEvent
SearchScreeningEvent
BookRestaurant
BookRestaurant
BookRestaurant
PlayMusic
SearchCreativeWork
PlayMusic
BookRestaurant
BookRestaurant
RateBook
RateBook
RateBook
PlayMusic
SearchScreeningEvent
RateBook
GetWeather
AddToPlaylist
BookRestaurant
AddToPlaylist
RateBook
GetWeather
AddToPlaylist
RateBook
PlayMusic
PlayMusic
GetWeather
RateBook
SearchScreeningEvent
SearchScreeningEvent
GetWeather
RateBook
BookRestaurant
AddToPlaylist
BookRestaurant
RateBook
SearchCreativeWork
RateBook
SearchCreativeWork
AddToPlaylist
SearchCreativeWork
AddToPlaylist
SearchScreeningEvent
PlayMusic
BookRestaurant
RateBook
SearchCreativeWork
PlayMusic
PlayMusic
PlayMusic
SearchCreativeWork
SearchScreeningEvent
RateBook
GetWeather
BookRestaurant
SearchScreeningEvent
SearchCreativeWork
AddToPlaylist
SearchCreativeWork
AddToPlaylist
SearchScreeningEvent
PlayMusic
PlayMusic
PlayMusic
SearchScreeningEvent
BookRestaurant
GetWeather
BookRestaurant
PlayMusic
RateBook
SearchScreeningEvent
SearchCreativeWork
SearchScreeningEvent
GetWeather
SearchCreativeWork
AddToPlaylist
RateBook
GetWeather
SearchScreeningEvent
GetWeather
GetWeather
SearchScreeningEvent
BookRestaurant
PlayMusic
PlayMusic
SearchCreativeWork
SearchCreativeWork
SearchCreativeWork
BookRestaurant
AddToPlaylist
GetWeather
GetWeather
AddToPlaylist
GetWeather
GetWeather
GetWeather
GetWeather
SearchScreeningEvent
RateBook
BookRestaurant
AddToPlaylist
RateBook
PlayMusic
PlayMusic
BookRestaurant
BookRestaurant
GetWeather
RateBook
PlayMusic
SearchCreativeWork
GetWeather
BookRestaurant
GetWeather
RateBook
SearchScreeningEvent
BookRestaurant
RateBook
SearchCreativeWork
SearchScreeningEvent
SearchCreativeWork
RateBook
RateBook
SearchScreeningEvent
BookRestaurant
GetWeather
RateBook
PlayMusic
AddToPlaylist
GetWeather
PlayMusic
RateBook
SearchScreeningEvent
SearchScreeningEvent
SearchCreativeWork
GetWeather
RateBook
BookRestaurant
SearchCreativeWork
GetWeather
GetWeather
SearchCreativeWork
RateBook
BookRestaurant
SearchCreativeWork
SearchCreativeWork
SearchCreativeWork
RateBook
SearchScreeningEvent
PlayMusic
RateBook
SearchScreeningEvent
AddToPlaylist
BookRestaurant
BookRestaurant
BookRestaurant
SearchScreeningEvent
BookRestaurant
BookRestaurant
SearchScreeningEvent
SearchCreativeWork
PlayMusic
RateBook
BookRestaurant
AddToPlaylist
SearchCreativeWork
RateBook
PlayMusic
SearchScreeningEvent
PlayMusic
PlayMusic
BookRestaurant
GetWeather
SearchScreeningEvent
SearchCreativeWork
AddToPlaylist
AddToPlaylist
PlayMusic
AddToPlaylist
RateBook
SearchScreeningEvent
RateBook
BookRestaurant
GetWeather
AddToPlaylist
BookRestaurant
GetWeather
AddToPlaylist
SearchCreativeWork
RateBook
PlayMusic
RateBook
SearchCreativeWork
RateBook
PlayMusic
SearchScreeningEvent
AddToPlaylist
GetWeather
SearchScreeningEvent
GetWeather
PlayMusic
PlayMusic
BookRestaurant
RateBook
SearchCreativeWork
AddToPlaylist
SearchCreativeWork
GetWeather
PlayMusic
SearchScreeningEvent
SearchScreeningEvent
SearchCreativeWork
GetWeather
SearchScreeningEvent
SearchScreeningEvent
SearchScreeningEvent
BookRestaurant
GetWeather
AddToPlaylist
GetWeather
RateBook
AddToPlaylist
BookRestaurant
AddToPlaylist
BookRestaurant
AddToPlaylist
AddToPlaylist
AddToPlaylist
RateBook
GetWeather
SearchScreeningEvent
SearchCreativeWork
AddToPlaylist
PlayMusic
GetWeather
GetWeather
PlayMusic
GetWeather
GetWeather
GetWeather
PlayMusic
BookRestaurant
PlayMusic
BookRestaurant
SearchScreeningEvent
PlayMusic
AddToPlaylist
SearchCreativeWork
SearchScreeningEvent
SearchScreeningEvent
BookRestaurant
SearchCreativeWork
GetWeather
SearchScreeningEvent
AddToPlaylist
AddToPlaylist
PlayMusic
PlayMusic
AddToPlaylist
SearchScreeningEvent
AddToPlaylist
PlayMusic
BookRestaurant
RateBook
BookRestaurant
AddToPlaylist
RateBook
AddToPlaylist
SearchCreativeWork
AddToPlaylist
RateBook
PlayMusic
PlayMusic
PlayMusic
BookRestaurant
GetWeather
RateBook
AddToPlaylist
AddToPlaylist
PlayMusic
SearchScreeningEvent
SearchCreativeWork
PlayMusic
AddToPlaylist
SearchScreeningEvent
GetWeather
PlayMusic
SearchScreeningEvent
GetWeather
RateBook
RateBook
SearchCreativeWork
SearchScreeningEvent
SearchCreativeWork
GetWeather
PlayMusic
PlayMusic
PlayMusic
SearchCreativeWork
BookRestaurant
SearchCreativeWork
GetWeather
RateBook
SearchScreeningEvent
RateBook
SearchScreeningEvent
GetWeather
PlayMusic
PlayMusic
SearchCreativeWork
GetWeather
AddToPlaylist
BookRestaurant
RateBook
AddToPlaylist
AddToPlaylist
SearchScreeningEvent
SearchCreativeWork
AddToPlaylist
GetWeather
SearchCreativeWork
SearchCreativeWork
SearchScreeningEvent
SearchScreeningEvent
GetWeather
SearchCreativeWork
SearchCreativeWork
BookRestaurant
GetWeather
BookRestaurant
RateBook
AddToPlaylist
BookRestaurant
AddToPlaylist
SearchCreativeWork
RateBook
GetWeather
SearchScreeningEvent
PlayMusic
GetWeather
GetWeather
PlayMusic
GetWeather
SearchScreeningEvent
SearchScreeningEvent
AddToPlaylist
RateBook
PlayMusic
BookRestaurant
GetWeather
BookRestaurant
BookRestaurant
AddToPlaylist
GetWeather
SearchCreativeWork
SearchCreativeWork
GetWeather
PlayMusic
AddToPlaylist
SearchScreeningEvent
BookRestaurant
PlayMusic
SearchCreativeWork
GetWeather
AddToPlaylist
GetWeather
BookRestaurant
BookRestaurant
BookRestaurant
BookRestaurant
BookRestaurant
AddToPlaylist
AddToPlaylist
RateBook
SearchCreativeWork
SearchScreeningEvent
PlayMusic
PlayMusic
SearchCreativeWork
RateBook
PlayMusic
SearchCreativeWork
AddToPlaylist
GetWeather
SearchCreativeWork
RateBook
GetWeather
PlayMusic
GetWeather
SearchScreeningEvent
GetWeather
PlayMusic
GetWeather
PlayMusic
PlayMusic
BookRestaurant
SearchCreativeWork
AddToPlaylist
SearchCreativeWork
BookRestaurant
GetWeather
PlayMusic
PlayMusic
RateBook
SearchScreeningEvent
GetWeather
BookRestaurant
SearchCreativeWork
SearchScreeningEvent
AddToPlaylist
GetWeather
SearchScreeningEvent
RateBook
SearchScreeningEvent
SearchCreativeWork
SearchCreativeWork
BookRestaurant
AddToPlaylist
SearchScreeningEvent
GetWeather
SearchScreeningEvent
RateBook
PlayMusic
PlayMusic
PlayMusic
GetWeather
SearchScreeningEvent
SearchCreativeWork
PlayMusic
GetWeather
BookRestaurant
AddToPlaylist
GetWeather
BookRestaurant
AddToPlaylist
RateBook
SearchCreativeWork
GetWeather
AddToPlaylist
AddToPlaylist
PlayMusic
RateBook
AddToPlaylist
PlayMusic
BookRestaurant
GetWeather
RateBook
SearchScreeningEvent
BookRestaurant
BookRestaurant
AddToPlaylist
BookRestaurant
SearchScreeningEvent
PlayMusic
PlayMusic
RateBook
BookRestaurant
AddToPlaylist
GetWeather
GetWeather
PlayMusic
AddToPlaylist
SearchScreeningEvent
SearchScreeningEvent
SearchScreeningEvent
RateBook
AddToPlaylist
BookRestaurant
PlayMusic
PlayMusic
AddToPlaylist
SearchScreeningEvent
BookRestaurant
RateBook
BookRestaurant
SearchCreativeWork
SearchCreativeWork
AddToPlaylist
GetWeather
PlayMusic
PlayMusic
GetWeather
GetWeather
AddToPlaylist
SearchCreativeWork
SearchCreativeWork
GetWeather
PlayMusic
GetWeather
GetWeather
GetWeather
GetWeather
PlayMusic
GetWeather
PlayMusic
AddToPlaylist
SearchScreeningEvent
PlayMusic
PlayMusic
RateBook
GetWeather
SearchScreeningEvent
SearchCreativeWork
SearchCreativeWork
SearchCreativeWork
GetWeather
GetWeather
BookRestaurant
AddToPlaylist
PlayMusic
RateBook
GetWeather
PlayMusic
RateBook
BookRestaurant
BookRestaurant
RateBook
BookRestaurant
RateBook
PlayMusic
BookRestaurant
GetWeather
BookRestaurant
PlayMusic
SearchScreeningEvent
RateBook
RateBook
AddToPlaylist
GetWeather
AddToPlaylist
PlayMusic
RateBook
SearchScreeningEvent
AddToPlaylist
GetWeather
SearchScreeningEvent
BookRestaurant
GetWeather
PlayMusic
GetWeather
BookRestaurant
AddToPlaylist
SearchScreeningEvent
PlayMusic
BookRestaurant
SearchCreativeWork
AddToPlaylist
PlayMusic
GetWeather
AddToPlaylist
PlayMusic
RateBook
SearchCreativeWork
BookRestaurant
SearchCreativeWork
PlayMusic
BookRestaurant
GetWeather
BookRestaurant
BookRestaurant
GetWeather
RateBook
PlayMusic
PlayMusic
AddToPlaylist
SearchCreativeWork
AddToPlaylist
RateBook
BookRestaurant
BookRestaurant
SearchCreativeWork
AddToPlaylist
SearchScreeningEvent
PlayMusic
GetWeather
RateBook
PlayMusic
GetWeather
SearchCreativeWork
GetWeather
AddToPlaylist
PlayMusic
RateBook
SearchCreativeWork
RateBook
PlayMusic
BookRestaurant
SearchCreativeWork
SearchScreeningEvent
RateBook
BookRestaurant
BookRestaurant
AddToPlaylist
SearchCreativeWork
GetWeather
AddToPlaylist
PlayMusic
SearchScreeningEvent
BookRestaurant
BookRestaurant
SearchCreativeWork
AddToPlaylist
RateBook
AddToPlaylist
SearchCreativeWork
PlayMusic
SearchCreativeWork
AddToPlaylist
AddToPlaylist
SearchCreativeWork
PlayMusic
BookRestaurant
SearchScreeningEvent
GetWeather
AddToPlaylist
SearchScreeningEvent
GetWeather
GetWeather
SearchScreeningEvent
SearchCreativeWork
RateBook
PlayMusic
PlayMusic
BookRestaurant
GetWeather
SearchScreeningEvent
BookRestaurant
SearchCreativeWork
PlayMusic
SearchScreeningEvent
SearchCreativeWork
AddToPlaylist
SearchScreeningEvent
AddToPlaylist
GetWeather
RateBook
SearchScreeningEvent
SearchCreativeWork
AddToPlaylist
RateBook
RateBook
SearchCreativeWork
GetWeather
RateBook
AddToPlaylist
SearchCreativeWork
SearchScreeningEvent
SearchScreeningEvent
PlayMusic
GetWeather
RateBook
RateBook
SearchCreativeWork
SearchCreativeWork
SearchCreativeWork
RateBook
SearchScreeningEvent
AddToPlaylist
SearchCreativeWork
RateBook
SearchCreativeWork
SearchCreativeWork
GetWeather
SearchScreeningEvent
SearchCreativeWork
PlayMusic
PlayMusic
RateBook
BookRestaurant
SearchScreeningEvent
BookRestaurant
PlayMusic
GetWeather
SearchCreativeWork
RateBook
SearchScreeningEvent
RateBook
BookRestaurant
BookRestaurant
PlayMusic
GetWeather
AddToPlaylist
AddToPlaylist
PlayMusic
GetWeather
SearchCreativeWork
GetWeather
RateBook
BookRestaurant
BookRestaurant
BookRestaurant
GetWeather
PlayMusic
BookRestaurant
SearchScreeningEvent
PlayMusic
AddToPlaylist
SearchScreeningEvent
RateBook
RateBook
PlayMusic
RateBook
RateBook
GetWeather
SearchCreativeWork
SearchScreeningEvent
AddToPlaylist
PlayMusic
SearchCreativeWork
PlayMusic
SearchCreativeWork
AddToPlaylist
BookRestaurant
RateBook
SearchScreeningEvent
GetWeather
SearchScreeningEvent
SearchScreeningEvent
BookRestaurant
AddToPlaylist
SearchCreativeWork
RateBook
SearchScreeningEvent
SearchCreativeWork
GetWeather
AddToPlaylist
SearchScreeningEvent
GetWeather
AddToPlaylist
PlayMusic
BookRestaurant
GetWeather
GetWeather
SearchCreativeWork
AddToPlaylist
AddToPlaylist
PlayMusic
PlayMusic
SearchScreeningEvent
RateBook
GetWeather
BookRestaurant
BookRestaurant
BookRestaurant
BookRestaurant
RateBook
SearchCreativeWork
RateBook
BookRestaurant
AddToPlaylist
RateBook
RateBook
GetWeather
BookRestaurant
GetWeather
AddToPlaylist
PlayMusic
SearchScreeningEvent
SearchCreativeWork
RateBook
SearchCreativeWork
BookRestaurant
RateBook
RateBook
SearchCreativeWork
BookRestaurant
BookRestaurant
AddToPlaylist
AddToPlaylist
GetWeather
BookRestaurant
AddToPlaylist
BookRestaurant
AddToPlaylist
AddToPlaylist
SearchScreeningEvent
GetWeather
GetWeather
RateBook
RateBook
BookRestaurant
SearchScreeningEvent
AddToPlaylist
SearchScreeningEvent
GetWeather
RateBook
PlayMusic
SearchScreeningEvent
SearchCreativeWork
SearchScreeningEvent
SearchScreeningEvent
RateBook
BookRestaurant
AddToPlaylist
SearchCreativeWork
SearchCreativeWork
RateBook
GetWeather
PlayMusic
AddToPlaylist
GetWeather
GetWeather
RateBook
SearchScreeningEvent
BookRestaurant
BookRestaurant
PlayMusic
RateBook
BookRestaurant
AddToPlaylist
SearchCreativeWork
AddToPlaylist
BookRestaurant
PlayMusic
PlayMusic
SearchCreativeWork
PlayMusic
SearchCreativeWork
SearchCreativeWork
GetWeather
PlayMusic
RateBook
BookRestaurant
RateBook
PlayMusic
SearchCreativeWork
PlayMusic
RateBook
AddToPlaylist
SearchCreativeWork
BookRestaurant
AddToPlaylist
AddToPlaylist
SearchScreeningEvent
BookRestaurant
PlayMusic
SearchCreativeWork
RateBook
SearchScreeningEvent
SearchScreeningEvent
SearchCreativeWork
AddToPlaylist
BookRestaurant
RateBook
SearchCreativeWork
SearchScreeningEvent
RateBook
SearchCreativeWork
PlayMusic
SearchCreativeWork
GetWeather
GetWeather
SearchCreativeWork
SearchScreeningEvent
BookRestaurant
SearchCreativeWork
PlayMusic
BookRestaurant
SearchCreativeWork
BookRestaurant
GetWeather
SearchScreeningEvent
BookRestaurant
SearchCreativeWork
SearchCreativeWork
PlayMusic
SearchScreeningEvent
BookRestaurant
RateBook
SearchCreativeWork
SearchCreativeWork
AddToPlaylist
PlayMusic
PlayMusic
PlayMusic
AddToPlaylist
BookRestaurant
BookRestaurant
SearchScreeningEvent
BookRestaurant
BookRestaurant
PlayMusic
GetWeather
SearchScreeningEvent
AddToPlaylist
BookRestaurant
RateBook
SearchCreativeWork
BookRestaurant
GetWeather
SearchScreeningEvent
PlayMusic
RateBook
PlayMusic
RateBook
SearchCreativeWork
SearchScreeningEvent
SearchCreativeWork
BookRestaurant
RateBook
PlayMusic
AddToPlaylist
SearchCreativeWork
AddToPlaylist
AddToPlaylist
SearchScreeningEvent
AddToPlaylist
BookRestaurant
RateBook
BookRestaurant
BookRestaurant
PlayMusic
RateBook
GetWeather
PlayMusic
RateBook
GetWeather
PlayMusic
SearchScreeningEvent
SearchScreeningEvent
AddToPlaylist
GetWeather
SearchScreeningEvent
AddToPlaylist
GetWeather
GetWeather
BookRestaurant
GetWeather
PlayMusic
PlayMusic
SearchScreeningEvent
PlayMusic
AddToPlaylist
BookRestaurant
AddToPlaylist
PlayMusic
GetWeather
BookRestaurant
BookRestaurant
SearchCreativeWork
SearchScreeningEvent
SearchCreativeWork
SearchScreeningEvent
BookRestaurant
BookRestaurant
BookRestaurant
SearchScreeningEvent
GetWeather
SearchScreeningEvent
BookRestaurant
SearchCreativeWork
PlayMusic
AddToPlaylist
AddToPlaylist
SearchScreeningEvent
SearchCreativeWork
BookRestaurant
BookRestaurant
SearchScreeningEvent
SearchCreativeWork
SearchCreativeWork
PlayMusic
SearchScreeningEvent
PlayMusic
SearchScreeningEvent
RateBook
PlayMusic
BookRestaurant
BookRestaurant
BookRestaurant
PlayMusic
SearchScreeningEvent
BookRestaurant
GetWeather
RateBook
BookRestaurant
BookRestaurant
PlayMusic
BookRestaurant
SearchScreeningEvent
AddToPlaylist
AddToPlaylist
SearchScreeningEvent
SearchScreeningEvent
RateBook
PlayMusic
RateBook
RateBook
BookRestaurant
AddToPlaylist
SearchCreativeWork
SearchCreativeWork
SearchCreativeWork
RateBook
SearchScreeningEvent
PlayMusic
PlayMusic
RateBook
PlayMusic
PlayMusic
PlayMusic
PlayMusic
BookRestaurant
AddToPlaylist
SearchCreativeWork
PlayMusic
SearchScreeningEvent
PlayMusic
PlayMusic
SearchCreativeWork
RateBook
AddToPlaylist
SearchScreeningEvent
BookRestaurant
PlayMusic
BookRestaurant
SearchCreativeWork
AddToPlaylist
RateBook
SearchScreeningEvent
PlayMusic
RateBook
SearchCreativeWork
BookRestaurant
RateBook
GetWeather
SearchCreativeWork
PlayMusic
SearchScreeningEvent
SearchCreativeWork
SearchScreeningEvent
SearchCreativeWork
RateBook
GetWeather
SearchCreativeWork
SearchScreeningEvent
PlayMusic
RateBook
PlayMusic
BookRestaurant
GetWeather
RateBook
SearchScreeningEvent
RateBook
SearchCreativeWork
PlayMusic
RateBook
AddToPlaylist
GetWeather
PlayMusic
SearchCreativeWork
SearchCreativeWork
SearchScreeningEvent
AddToPlaylist
SearchCreativeWork
PlayMusic
SearchCreativeWork
GetWeather
SearchCreativeWork
BookRestaurant
SearchScreeningEvent
RateBook
AddToPlaylist
SearchScreeningEvent
PlayMusic
PlayMusic
PlayMusic
RateBook
BookRestaurant
BookRestaurant
SearchCreativeWork
AddToPlaylist
PlayMusic
SearchCreativeWork
SearchScreeningEvent
SearchScreeningEvent
RateBook
GetWeather
SearchScreeningEvent
BookRestaurant
BookRestaurant
GetWeather
GetWeather
SearchCreativeWork
AddToPlaylist
SearchScreeningEvent
RateBook
BookRestaurant
AddToPlaylist
AddToPlaylist
GetWeather
BookRestaurant
BookRestaurant
BookRestaurant
BookRestaurant
AddToPlaylist
SearchScreeningEvent
RateBook
RateBook
GetWeather
RateBook
GetWeather
SearchCreativeWork
RateBook
PlayMusic
RateBook
SearchCreativeWork
AddToPlaylist
SearchScreeningEvent
PlayMusic
PlayMusic
PlayMusic
SearchScreeningEvent
SearchScreeningEvent
PlayMusic
PlayMusic
RateBook
PlayMusic
GetWeather
RateBook
SearchScreeningEvent
SearchScreeningEvent
SearchCreativeWork
BookRestaurant
PlayMusic
SearchCreativeWork
AddToPlaylist
SearchScreeningEvent
GetWeather
SearchScreeningEvent
SearchCreativeWork
PlayMusic
SearchCreativeWork
SearchCreativeWork
SearchCreativeWork
AddToPlaylist
AddToPlaylist
GetWeather
SearchScreeningEvent
PlayMusic
PlayMusic
SearchScreeningEvent
SearchScreeningEvent
BookRestaurant
SearchScreeningEvent
AddToPlaylist
SearchScreeningEvent
PlayMusic
SearchCreativeWork
RateBook
SearchCreativeWork
PlayMusic
RateBook
BookRestaurant
SearchCreativeWork
SearchCreativeWork
SearchCreativeWork
SearchCreativeWork
SearchScreeningEvent
SearchScreeningEvent
SearchCreativeWork
SearchScreeningEvent
BookRestaurant
BookRestaurant
RateBook
BookRestaurant
GetWeather
RateBook
PlayMusic
GetWeather
GetWeather
SearchCreativeWork
BookRestaurant
SearchCreativeWork
RateBook
SearchCreativeWork
BookRestaurant
GetWeather
SearchCreativeWork
SearchScreeningEvent
AddToPlaylist
BookRestaurant
SearchCreativeWork
PlayMusic
BookRestaurant
RateBook
AddToPlaylist
BookRestaurant
BookRestaurant
PlayMusic
SearchCreativeWork
BookRestaurant
GetWeather
BookRestaurant
SearchScreeningEvent
SearchCreativeWork
GetWeather
SearchCreativeWork
BookRestaurant
RateBook
PlayMusic
PlayMusic
SearchScreeningEvent
GetWeather
SearchCreativeWork
PlayMusic
BookRestaurant
AddToPlaylist
SearchCreativeWork
AddToPlaylist
BookRestaurant
PlayMusic
RateBook
SearchCreativeWork
RateBook
AddToPlaylist
GetWeather
RateBook
AddToPlaylist
RateBook
RateBook
AddToPlaylist
SearchCreativeWork
GetWeather
GetWeather
SearchCreativeWork
PlayMusic
PlayMusic
BookRestaurant
PlayMusic
BookRestaurant
PlayMusic
SearchScreeningEvent
RateBook
BookRestaurant
SearchScreeningEvent
AddToPlaylist
RateBook
BookRestaurant
AddToPlaylist
RateBook
SearchScreeningEvent
PlayMusic
AddToPlaylist
GetWeather
AddToPlaylist
RateBook
BookRestaurant
PlayMusic
GetWeather
PlayMusic
GetWeather
AddToPlaylist
RateBook
GetWeather
PlayMusic
RateBook
SearchCreativeWork
PlayMusic
SearchScreeningEvent
GetWeather
PlayMusic
SearchScreeningEvent
SearchCreativeWork
SearchCreativeWork
RateBook
SearchCreativeWork
AddToPlaylist
GetWeather
SearchCreativeWork
GetWeather
RateBook
BookRestaurant
GetWeather
GetWeather
GetWeather
RateBook
GetWeather
AddToPlaylist
AddToPlaylist
AddToPlaylist
SearchCreativeWork
SearchCreativeWork
PlayMusic
BookRestaurant
GetWeather
GetWeather
PlayMusic
GetWeather
PlayMusic
PlayMusic
SearchCreativeWork
SearchCreativeWork
SearchCreativeWork
BookRestaurant
RateBook
GetWeather
AddToPlaylist
GetWeather
BookRestaurant
GetWeather
RateBook
BookRestaurant
SearchCreativeWork
RateBook
AddToPlaylist
SearchScreeningEvent
SearchScreeningEvent
GetWeather
GetWeather
SearchCreativeWork
AddToPlaylist
SearchCreativeWork
AddToPlaylist
SearchScreeningEvent
SearchCreativeWork
SearchScreeningEvent
RateBook
AddToPlaylist
BookRestaurant
PlayMusic
SearchScreeningEvent
BookRestaurant
RateBook
SearchCreativeWork
RateBook
SearchCreativeWork
RateBook
SearchScreeningEvent
AddToPlaylist
GetWeather
SearchCreativeWork
SearchScreeningEvent
BookRestaurant
SearchScreeningEvent
GetWeather
PlayMusic
SearchCreativeWork
SearchCreativeWork
GetWeather
GetWeather
PlayMusic
PlayMusic
PlayMusic
GetWeather
PlayMusic
RateBook
GetWeather
BookRestaurant
SearchScreeningEvent
GetWeather
BookRestaurant
BookRestaurant
GetWeather
SearchScreeningEvent
AddToPlaylist
AddToPlaylist
BookRestaurant
GetWeather
SearchScreeningEvent
GetWeather
GetWeather
AddToPlaylist
RateBook
SearchCreativeWork
SearchScreeningEvent
SearchScreeningEvent
PlayMusic
AddToPlaylist
BookRestaurant
GetWeather
PlayMusic
PlayMusic
SearchCreativeWork
GetWeather
GetWeather
RateBook
GetWeather
RateBook
SearchScreeningEvent
BookRestaurant
SearchCreativeWork
PlayMusic
PlayMusic
AddToPlaylist
SearchCreativeWork
AddToPlaylist
GetWeather
PlayMusic
AddToPlaylist
RateBook
PlayMusic
BookRestaurant
PlayMusic
PlayMusic
SearchScreeningEvent
AddToPlaylist
AddToPlaylist
BookRestaurant
SearchCreativeWork
RateBook
PlayMusic
SearchCreativeWork
PlayMusic
RateBook
AddToPlaylist
PlayMusic
BookRestaurant
SearchCreativeWork
PlayMusic
RateBook
SearchScreeningEvent
BookRestaurant
PlayMusic
RateBook
SearchScreeningEvent
SearchCreativeWork
PlayMusic
SearchCreativeWork
RateBook
BookRestaurant
BookRestaurant
SearchCreativeWork
SearchScreeningEvent
BookRestaurant
BookRestaurant
SearchScreeningEvent
BookRestaurant
RateBook
SearchCreativeWork
PlayMusic
RateBook
RateBook
AddToPlaylist
SearchCreativeWork
SearchScreeningEvent
AddToPlaylist
PlayMusic
GetWeather
AddToPlaylist
SearchCreativeWork
PlayMusic
RateBook
SearchCreativeWork
BookRestaurant
BookRestaurant
PlayMusic
SearchScreeningEvent
AddToPlaylist
SearchCreativeWork
BookRestaurant
RateBook
RateBook
AddToPlaylist
SearchScreeningEvent
BookRestaurant
SearchScreeningEvent
RateBook
SearchScreeningEvent
AddToPlaylist
AddToPlaylist
AddToPlaylist
SearchCreativeWork
SearchCreativeWork
AddToPlaylist
RateBook
PlayMusic
AddToPlaylist
BookRestaurant
PlayMusic
GetWeather
BookRestaurant
GetWeather
AddToPlaylist
AddToPlaylist
BookRestaurant
AddToPlaylist
GetWeather
AddToPlaylist
BookRestaurant
BookRestaurant
GetWeather
BookRestaurant
BookRestaurant
AddToPlaylist
AddToPlaylist
AddToPlaylist
PlayMusic
AddToPlaylist
AddToPlaylist
AddToPlaylist
SearchScreeningEvent
GetWeather
RateBook
PlayMusic
BookRestaurant
SearchScreeningEvent
SearchCreativeWork
RateBook
RateBook
SearchCreativeWork
AddToPlaylist
RateBook
GetWeather
AddToPlaylist
AddToPlaylist
GetWeather
GetWeather
AddToPlaylist
AddToPlaylist
PlayMusic
GetWeather
SearchScreeningEvent
GetWeather
BookRestaurant
SearchCreativeWork
AddToPlaylist
RateBook
GetWeather
PlayMusic
BookRestaurant
BookRestaurant
SearchCreativeWork
PlayMusic
RateBook
AddToPlaylist
RateBook
SearchCreativeWork
RateBook
AddToPlaylist
SearchScreeningEvent
BookRestaurant
GetWeather
SearchCreativeWork
SearchScreeningEvent
AddToPlaylist
AddToPlaylist
AddToPlaylist
PlayMusic
BookRestaurant
BookRestaurant
SearchScreeningEvent
GetWeather
SearchCreativeWork
SearchScreeningEvent
BookRestaurant
PlayMusic
AddToPlaylist
AddToPlaylist
RateBook
BookRestaurant
SearchCreativeWork
GetWeather
GetWeather
SearchCreativeWork
PlayMusic
GetWeather
PlayMusic
SearchCreativeWork
SearchScreeningEvent
BookRestaurant
BookRestaurant
AddToPlaylist
SearchScreeningEvent
SearchScreeningEvent
SearchScreeningEvent
PlayMusic
PlayMusic
GetWeather
RateBook
GetWeather
SearchCreativeWork
AddToPlaylist
AddToPlaylist
SearchCreativeWork
SearchScreeningEvent
BookRestaurant
BookRestaurant
GetWeather
AddToPlaylist
BookRestaurant
SearchScreeningEvent
AddToPlaylist
BookRestaurant
GetWeather
SearchCreativeWork
PlayMusic
GetWeather
RateBook
SearchCreativeWork
SearchScreeningEvent
BookRestaurant
AddToPlaylist
AddToPlaylist
GetWeather
RateBook
SearchCreativeWork
SearchScreeningEvent
SearchCreativeWork
PlayMusic
RateBook
GetWeather
PlayMusic
GetWeather
SearchScreeningEvent
SearchCreativeWork
SearchScreeningEvent
AddToPlaylist
GetWeather
GetWeather
AddToPlaylist
AddToPlaylist
PlayMusic
BookRestaurant
GetWeather
SearchScreeningEvent
AddToPlaylist
PlayMusic
AddToPlaylist
SearchScreeningEvent
PlayMusic
RateBook
PlayMusic
SearchScreeningEvent
SearchCreativeWork
AddToPlaylist
SearchScreeningEvent
RateBook
PlayMusic
GetWeather
AddToPlaylist
RateBook
GetWeather
SearchScreeningEvent
RateBook
GetWeather
AddToPlaylist
SearchScreeningEvent
GetWeather
SearchCreativeWork
BookRestaurant
PlayMusic
BookRestaurant
GetWeather
GetWeather
PlayMusic
GetWeather
SearchScreeningEvent
GetWeather
SearchCreativeWork
AddToPlaylist
AddToPlaylist
SearchScreeningEvent
PlayMusic
SearchCreativeWork
RateBook
RateBook
SearchScreeningEvent
BookRestaurant
SearchCreativeWork
RateBook
GetWeather
SearchCreativeWork
RateBook
AddToPlaylist
SearchScreeningEvent
GetWeather
SearchCreativeWork
GetWeather
SearchScreeningEvent
RateBook
AddToPlaylist
BookRestaurant
RateBook
PlayMusic
RateBook
PlayMusic
RateBook
PlayMusic
SearchCreativeWork
SearchCreativeWork
BookRestaurant
AddToPlaylist
SearchCreativeWork
SearchCreativeWork
AddToPlaylist
GetWeather
BookRestaurant
SearchCreativeWork
SearchScreeningEvent
AddToPlaylist
GetWeather
SearchCreativeWork
AddToPlaylist
SearchScreeningEvent
BookRestaurant
PlayMusic
RateBook
PlayMusic
SearchScreeningEvent
SearchCreativeWork
AddToPlaylist
BookRestaurant
SearchCreativeWork
BookRestaurant
AddToPlaylist
SearchCreativeWork
AddToPlaylist
BookRestaurant
PlayMusic
BookRestaurant
PlayMusic
GetWeather
SearchCreativeWork
BookRestaurant
GetWeather
PlayMusic
RateBook
AddToPlaylist
RateBook
SearchCreativeWork
BookRestaurant
PlayMusic
PlayMusic
SearchCreativeWork
AddToPlaylist
SearchScreeningEvent
PlayMusic
SearchScreeningEvent
AddToPlaylist
BookRestaurant
BookRestaurant
GetWeather
BookRestaurant
PlayMusic
PlayMusic
RateBook
SearchCreativeWork
SearchCreativeWork
BookRestaurant
PlayMusic
GetWeather
AddToPlaylist
BookRestaurant
AddToPlaylist
AddToPlaylist
AddToPlaylist
SearchCreativeWork
AddToPlaylist
SearchScreeningEvent
BookRestaurant
AddToPlaylist
GetWeather
SearchCreativeWork
PlayMusic
SearchScreeningEvent
SearchScreeningEvent
BookRestaurant
SearchCreativeWork
GetWeather
AddToPlaylist
PlayMusic
AddToPlaylist
GetWeather
SearchScreeningEvent
PlayMusic
AddToPlaylist
SearchCreativeWork
BookRestaurant
RateBook
RateBook
SearchScreeningEvent
GetWeather
PlayMusic
SearchScreeningEvent
BookRestaurant
AddToPlaylist
RateBook
SearchScreeningEvent
AddToPlaylist
SearchScreeningEvent
RateBook
GetWeather
PlayMusic
SearchCreativeWork
RateBook
RateBook
BookRestaurant
SearchScreeningEvent
RateBook
BookRestaurant
RateBook
GetWeather
PlayMusic
GetWeather
BookRestaurant
RateBook
PlayMusic
PlayMusic
GetWeather
AddToPlaylist
AddToPlaylist
PlayMusic
RateBook
BookRestaurant
GetWeather
PlayMusic
PlayMusic
BookRestaurant
SearchCreativeWork
BookRestaurant
PlayMusic
GetWeather
BookRestaurant
AddToPlaylist
AddToPlaylist
SearchCreativeWork
BookRestaurant
GetWeather
GetWeather
GetWeather
PlayMusic
SearchScreeningEvent
GetWeather
AddToPlaylist
SearchScreeningEvent
AddToPlaylist
SearchCreativeWork
SearchCreativeWork
BookRestaurant
BookRestaurant
BookRestaurant
BookRestaurant
AddToPlaylist
GetWeather
GetWeather
BookRestaurant
SearchCreativeWork
PlayMusic
RateBook
SearchScreeningEvent
PlayMusic
SearchCreativeWork
SearchScreeningEvent
AddToPlaylist
SearchCreativeWork
SearchScreeningEvent
GetWeather
PlayMusic
SearchScreeningEvent
SearchScreeningEvent
AddToPlaylist
GetWeather
SearchCreativeWork
SearchCreativeWork
RateBook
SearchCreativeWork
SearchCreativeWork
BookRestaurant
BookRestaurant
RateBook
SearchScreeningEvent
SearchCreativeWork
AddToPlaylist
AddToPlaylist
AddToPlaylist
SearchScreeningEvent
SearchCreativeWork
GetWeather
GetWeather
GetWeather
BookRestaurant
SearchCreativeWork
BookRestaurant
SearchCreativeWork
BookRestaurant
AddToPlaylist
GetWeather
BookRestaurant
SearchScreeningEvent
SearchCreativeWork
AddToPlaylist
SearchCreativeWork
GetWeather
RateBook
SearchScreeningEvent
GetWeather
AddToPlaylist
RateBook
AddToPlaylist
SearchCreativeWork
SearchScreeningEvent
GetWeather
RateBook
SearchScreeningEvent
PlayMusic
SearchScreeningEvent
AddToPlaylist
RateBook
RateBook
RateBook
SearchScreeningEvent
GetWeather
BookRestaurant
PlayMusic
BookRestaurant
SearchScreeningEvent
GetWeather
SearchScreeningEvent
RateBook
AddToPlaylist
SearchCreativeWork
SearchScreeningEvent
PlayMusic
AddToPlaylist
GetWeather
GetWeather
GetWeather
PlayMusic
GetWeather
BookRestaurant
SearchScreeningEvent
BookRestaurant
GetWeather
GetWeather
GetWeather
BookRestaurant
SearchScreeningEvent
AddToPlaylist
SearchScreeningEvent
BookRestaurant
AddToPlaylist
AddToPlaylist
RateBook
GetWeather
GetWeather
AddToPlaylist
SearchCreativeWork
GetWeather
RateBook
GetWeather
PlayMusic
SearchCreativeWork
PlayMusic
SearchCreativeWork
SearchScreeningEvent
SearchScreeningEvent
SearchScreeningEvent
SearchCreativeWork
PlayMusic
RateBook
GetWeather
SearchScreeningEvent
SearchCreativeWork
RateBook
RateBook
RateBook
AddToPlaylist
GetWeather
RateBook
BookRestaurant
RateBook
SearchScreeningEvent
PlayMusic
GetWeather
BookRestaurant
RateBook
GetWeather
SearchScreeningEvent
SearchCreativeWork
SearchScreeningEvent
SearchCreativeWork
BookRestaurant
SearchScreeningEvent
SearchScreeningEvent
BookRestaurant
AddToPlaylist
SearchCreativeWork
AddToPlaylist
SearchCreativeWork
BookRestaurant
SearchCreativeWork
BookRestaurant
PlayMusic
RateBook
RateBook
PlayMusic
AddToPlaylist
SearchScreeningEvent
GetWeather
GetWeather
GetWeather
SearchScreeningEvent
SearchCreativeWork
SearchCreativeWork
SearchCreativeWork
BookRestaurant
GetWeather
PlayMusic
PlayMusic
RateBook
SearchScreeningEvent
SearchCreativeWork
PlayMusic
GetWeather
BookRestaurant
PlayMusic
RateBook
BookRestaurant
BookRestaurant
SearchCreativeWork
PlayMusic
GetWeather
SearchCreativeWork
GetWeather
PlayMusic
SearchCreativeWork
AddToPlaylist
PlayMusic
BookRestaurant
BookRestaurant
GetWeather
RateBook
BookRestaurant
SearchScreeningEvent
PlayMusic
SearchScreeningEvent
GetWeather
BookRestaurant
SearchScreeningEvent
PlayMusic
RateBook
SearchScreeningEvent
GetWeather
RateBook
AddToPlaylist
SearchCreativeWork
SearchScreeningEvent
SearchCreativeWork
GetWeather
AddToPlaylist
AddToPlaylist
GetWeather
AddToPlaylist
AddToPlaylist
BookRestaurant
BookRestaurant
SearchScreeningEvent
PlayMusic
SearchScreeningEvent
AddToPlaylist
PlayMusic
SearchScreeningEvent
SearchScreeningEvent
SearchCreativeWork
PlayMusic
PlayMusic
AddToPlaylist
BookRestaurant
PlayMusic
RateBook
AddToPlaylist
SearchScreeningEvent
PlayMusic
PlayMusic
RateBook
GetWeather
GetWeather
SearchCreativeWork
SearchCreativeWork
PlayMusic
GetWeather
SearchScreeningEvent
GetWeather
PlayMusic
PlayMusic
AddToPlaylist
SearchScreeningEvent
AddToPlaylist
BookRestaurant
BookRestaurant
SearchScreeningEvent
RateBook
GetWeather
SearchScreeningEvent
AddToPlaylist
BookRestaurant
SearchScreeningEvent
GetWeather
SearchScreeningEvent
PlayMusic
BookRestaurant
RateBook
SearchCreativeWork
SearchScreeningEvent
SearchCreativeWork
BookRestaurant
AddToPlaylist
AddToPlaylist
PlayMusic
SearchCreativeWork
BookRestaurant
SearchCreativeWork
BookRestaurant
PlayMusic
SearchScreeningEvent
RateBook
RateBook
AddToPlaylist
PlayMusic
SearchScreeningEvent
AddToPlaylist
SearchScreeningEvent
RateBook
RateBook
SearchScreeningEvent
PlayMusic
PlayMusic
BookRestaurant
GetWeather
RateBook
SearchCreativeWork
SearchScreeningEvent
PlayMusic
BookRestaurant
PlayMusic
PlayMusic
GetWeather
SearchCreativeWork
SearchScreeningEvent
GetWeather
PlayMusic
SearchScreeningEvent
GetWeather
AddToPlaylist
AddToPlaylist
SearchScreeningEvent
SearchCreativeWork
PlayMusic
BookRestaurant
GetWeather
PlayMusic
BookRestaurant
SearchScreeningEvent
GetWeather
GetWeather
AddToPlaylist
PlayMusic
BookRestaurant
AddToPlaylist
SearchCreativeWork
GetWeather
PlayMusic
BookRestaurant
RateBook
GetWeather
PlayMusic
SearchScreeningEvent
SearchCreativeWork
SearchScreeningEvent
RateBook
SearchScreeningEvent
PlayMusic
RateBook
RateBook
RateBook
SearchCreativeWork
BookRestaurant
SearchScreeningEvent
SearchCreativeWork
SearchCreativeWork
SearchCreativeWork
SearchScreeningEvent
RateBook
AddToPlaylist
RateBook
BookRestaurant
RateBook
AddToPlaylist
AddToPlaylist
AddToPlaylist
AddToPlaylist
SearchScreeningEvent
BookRestaurant
GetWeather
RateBook
RateBook
GetWeather
SearchScreeningEvent
BookRestaurant
GetWeather
SearchCreativeWork
RateBook
SearchScreeningEvent
SearchScreeningEvent
SearchCreativeWork
PlayMusic
BookRestaurant
SearchScreeningEvent
BookRestaurant
RateBook
BookRestaurant
SearchScreeningEvent
PlayMusic
SearchCreativeWork
PlayMusic
AddToPlaylist
PlayMusic
PlayMusic
RateBook
RateBook
BookRestaurant
SearchScreeningEvent
AddToPlaylist
GetWeather
AddToPlaylist
PlayMusic
SearchScreeningEvent
SearchCreativeWork
BookRestaurant
PlayMusic
RateBook
RateBook
PlayMusic
RateBook
GetWeather
SearchCreativeWork
PlayMusic
RateBook
BookRestaurant
GetWeather
RateBook
RateBook
RateBook
SearchScreeningEvent
AddToPlaylist
RateBook
PlayMusic
SearchScreeningEvent
SearchCreativeWork
AddToPlaylist
AddToPlaylist
GetWeather
BookRestaurant
AddToPlaylist
AddToPlaylist
BookRestaurant
SearchScreeningEvent
GetWeather
PlayMusic
BookRestaurant
GetWeather
RateBook
BookRestaurant
PlayMusic
RateBook
PlayMusic
GetWeather
SearchCreativeWork
BookRestaurant
SearchScreeningEvent
PlayMusic
AddToPlaylist
GetWeather
BookRestaurant
SearchCreativeWork
RateBook
SearchScreeningEvent
BookRestaurant
RateBook
BookRestaurant
SearchScreeningEvent
PlayMusic
RateBook
PlayMusic
PlayMusic
PlayMusic
SearchCreativeWork
SearchCreativeWork
SearchCreativeWork
AddToPlaylist
RateBook
BookRestaurant
GetWeather
RateBook
SearchCreativeWork
GetWeather
RateBook
SearchCreativeWork
RateBook
GetWeather
PlayMusic
PlayMusic
SearchCreativeWork
RateBook
BookRestaurant
AddToPlaylist
PlayMusic
SearchScreeningEvent
SearchCreativeWork
SearchScreeningEvent
BookRestaurant
SearchScreeningEvent
SearchCreativeWork
GetWeather
SearchScreeningEvent
RateBook
PlayMusic
AddToPlaylist
PlayMusic
PlayMusic
SearchCreativeWork
SearchScreeningEvent
SearchScreeningEvent
SearchCreativeWork
AddToPlaylist
RateBook
GetWeather
BookRestaurant
AddToPlaylist
SearchCreativeWork
SearchScreeningEvent
GetWeather
GetWeather
PlayMusic
GetWeather
BookRestaurant
AddToPlaylist
RateBook
SearchCreativeWork
AddToPlaylist
PlayMusic
SearchCreativeWork
GetWeather
PlayMusic
RateBook
SearchScreeningEvent
SearchScreeningEvent
BookRestaurant
RateBook
SearchScreeningEvent
PlayMusic
SearchScreeningEvent
GetWeather
AddToPlaylist
SearchCreativeWork
RateBook
GetWeather
RateBook
BookRestaurant
GetWeather
PlayMusic
RateBook
RateBook
SearchCreativeWork
SearchCreativeWork
RateBook
GetWeather
BookRestaurant
BookRestaurant
RateBook
PlayMusic
AddToPlaylist
GetWeather
AddToPlaylist
BookRestaurant
PlayMusic
SearchScreeningEvent
AddToPlaylist
PlayMusic
BookRestaurant
GetWeather
AddToPlaylist
SearchScreeningEvent
GetWeather
PlayMusic
AddToPlaylist
BookRestaurant
RateBook
SearchCreativeWork
AddToPlaylist
SearchScreeningEvent
SearchScreeningEvent
BookRestaurant
PlayMusic
BookRestaurant
SearchScreeningEvent
SearchCreativeWork
RateBook
RateBook
SearchCreativeWork
PlayMusic
SearchCreativeWork
RateBook
RateBook
PlayMusic
SearchScreeningEvent
SearchCreativeWork
RateBook
GetWeather
BookRestaurant
GetWeather
RateBook
RateBook
AddToPlaylist
GetWeather
AddToPlaylist
BookRestaurant
SearchScreeningEvent
PlayMusic
RateBook
AddToPlaylist
SearchScreeningEvent
RateBook
RateBook
SearchCreativeWork
RateBook
SearchScreeningEvent
AddToPlaylist
SearchScreeningEvent
RateBook
PlayMusic
BookRestaurant
PlayMusic
BookRestaurant
PlayMusic
RateBook
SearchScreeningEvent
RateBook
PlayMusic
AddToPlaylist
RateBook
PlayMusic
GetWeather
AddToPlaylist
GetWeather
SearchCreativeWork
RateBook
RateBook
BookRestaurant
SearchCreativeWork
GetWeather
PlayMusic
BookRestaurant
PlayMusic
AddToPlaylist
BookRestaurant
GetWeather
RateBook
SearchScreeningEvent
SearchCreativeWork
BookRestaurant
RateBook
SearchCreativeWork
SearchCreativeWork
PlayMusic
AddToPlaylist
SearchCreativeWork
RateBook
GetWeather
SearchScreeningEvent
SearchScreeningEvent
RateBook
SearchCreativeWork
PlayMusic
SearchScreeningEvent
RateBook
SearchScreeningEvent
RateBook
RateBook
SearchScreeningEvent
RateBook
GetWeather
BookRestaurant
SearchCreativeWork
PlayMusic
BookRestaurant
GetWeather
GetWeather
RateBook
SearchCreativeWork
BookRestaurant
RateBook
RateBook
PlayMusic
GetWeather
GetWeather
SearchScreeningEvent
BookRestaurant
RateBook
AddToPlaylist
AddToPlaylist
GetWeather
RateBook
BookRestaurant
GetWeather
SearchCreativeWork
AddToPlaylist
AddToPlaylist
AddToPlaylist
PlayMusic
GetWeather
RateBook
PlayMusic
RateBook
PlayMusic
BookRestaurant
AddToPlaylist
PlayMusic
BookRestaurant
RateBook
BookRestaurant
BookRestaurant
SearchCreativeWork
SearchCreativeWork
PlayMusic
SearchScreeningEvent
PlayMusic
PlayMusic
AddToPlaylist
BookRestaurant
RateBook
SearchScreeningEvent
PlayMusic
GetWeather
GetWeather
SearchScreeningEvent
SearchScreeningEvent
PlayMusic
SearchCreativeWork
GetWeather
SearchCreativeWork
RateBook
SearchScreeningEvent
BookRestaurant
GetWeather
RateBook
RateBook
PlayMusic
BookRestaurant
SearchScreeningEvent
AddToPlaylist
SearchScreeningEvent
SearchCreativeWork
GetWeather
GetWeather
RateBook
PlayMusic
SearchScreeningEvent
AddToPlaylist
AddToPlaylist
SearchScreeningEvent
GetWeather
RateBook
SearchScreeningEvent
SearchCreativeWork
SearchCreativeWork
AddToPlaylist
PlayMusic
BookRestaurant
SearchCreativeWork
BookRestaurant
AddToPlaylist
SearchCreativeWork
SearchScreeningEvent
PlayMusic
PlayMusic
BookRestaurant
BookRestaurant
BookRestaurant
SearchCreativeWork
PlayMusic
SearchCreativeWork
SearchCreativeWork
AddToPlaylist
RateBook
RateBook
SearchCreativeWork
SearchScreeningEvent
GetWeather
SearchCreativeWork
SearchScreeningEvent
AddToPlaylist
GetWeather
SearchCreativeWork
AddToPlaylist
AddToPlaylist
SearchCreativeWork
GetWeather
RateBook
GetWeather
PlayMusic
GetWeather
SearchScreeningEvent
SearchCreativeWork
AddToPlaylist
GetWeather
PlayMusic
GetWeather
PlayMusic
PlayMusic
BookRestaurant
SearchScreeningEvent
BookRestaurant
AddToPlaylist
RateBook
BookRestaurant
SearchCreativeWork
PlayMusic
PlayMusic
GetWeather
AddToPlaylist
RateBook
AddToPlaylist
BookRestaurant
GetWeather
SearchCreativeWork
PlayMusic
PlayMusic
PlayMusic
GetWeather
SearchScreeningEvent
SearchCreativeWork
AddToPlaylist
SearchScreeningEvent
SearchCreativeWork
SearchCreativeWork
AddToPlaylist
AddToPlaylist
SearchScreeningEvent
PlayMusic
AddToPlaylist
GetWeather
AddToPlaylist
GetWeather
SearchCreativeWork
AddToPlaylist
GetWeather
BookRestaurant
SearchCreativeWork
GetWeather
AddToPlaylist
BookRestaurant
GetWeather
GetWeather
GetWeather
SearchScreeningEvent
AddToPlaylist
RateBook
SearchScreeningEvent
GetWeather
BookRestaurant
PlayMusic
BookRestaurant
SearchCreativeWork
SearchCreativeWork
GetWeather
PlayMusic
SearchScreeningEvent
AddToPlaylist
GetWeather
BookRestaurant
AddToPlaylist
BookRestaurant
PlayMusic
AddToPlaylist
RateBook
SearchScreeningEvent
AddToPlaylist
AddToPlaylist
RateBook
SearchScreeningEvent
GetWeather
GetWeather
PlayMusic
SearchCreativeWork
SearchCreativeWork
SearchScreeningEvent
GetWeather
BookRestaurant
RateBook
GetWeather
AddToPlaylist
AddToPlaylist
AddToPlaylist
AddToPlaylist
SearchScreeningEvent
GetWeather
AddToPlaylist
SearchCreativeWork
RateBook
SearchCreativeWork
RateBook
BookRestaurant
SearchCreativeWork
RateBook
SearchCreativeWork
BookRestaurant
AddToPlaylist
PlayMusic
SearchCreativeWork
RateBook
GetWeather
RateBook
RateBook
SearchCreativeWork
PlayMusic
BookRestaurant
AddToPlaylist
BookRestaurant
BookRestaurant
BookRestaurant
RateBook
RateBook
BookRestaurant
AddToPlaylist
RateBook
PlayMusic
BookRestaurant
AddToPlaylist
BookRestaurant
GetWeather
RateBook
RateBook
AddToPlaylist
SearchCreativeWork
GetWeather
SearchCreativeWork
AddToPlaylist
PlayMusic
BookRestaurant
PlayMusic
BookRestaurant
BookRestaurant
SearchCreativeWork
SearchCreativeWork
RateBook
SearchCreativeWork
PlayMusic
BookRestaurant
AddToPlaylist
PlayMusic
AddToPlaylist
GetWeather
AddToPlaylist
BookRestaurant
SearchCreativeWork
PlayMusic
SearchScreeningEvent
GetWeather
PlayMusic
AddToPlaylist
AddToPlaylist
BookRestaurant
BookRestaurant
BookRestaurant
AddToPlaylist
PlayMusic
AddToPlaylist
SearchCreativeWork
GetWeather
PlayMusic
GetWeather
BookRestaurant
AddToPlaylist
PlayMusic
AddToPlaylist
RateBook
RateBook
SearchScreeningEvent
BookRestaurant
GetWeather
PlayMusic
BookRestaurant
GetWeather
RateBook
PlayMusic
RateBook
PlayMusic
PlayMusic
SearchScreeningEvent
SearchScreeningEvent
PlayMusic
RateBook
RateBook
SearchScreeningEvent
RateBook
GetWeather
BookRestaurant
BookRestaurant
PlayMusic
RateBook
SearchScreeningEvent
BookRestaurant
RateBook
GetWeather
PlayMusic
AddToPlaylist
GetWeather
PlayMusic
GetWeather
GetWeather
BookRestaurant
AddToPlaylist
RateBook
AddToPlaylist
PlayMusic
AddToPlaylist
SearchCreativeWork
PlayMusic
GetWeather
PlayMusic
BookRestaurant
SearchScreeningEvent
AddToPlaylist
BookRestaurant
BookRestaurant
AddToPlaylist
SearchCreativeWork
SearchScreeningEvent
BookRestaurant
SearchCreativeWork
SearchScreeningEvent
BookRestaurant
GetWeather
AddToPlaylist
PlayMusic
RateBook
BookRestaurant
SearchCreativeWork
AddToPlaylist
GetWeather
PlayMusic
GetWeather
AddToPlaylist
AddToPlaylist
BookRestaurant
BookRestaurant
AddToPlaylist
GetWeather
RateBook
GetWeather
SearchScreeningEvent
PlayMusic
PlayMusic
SearchCreativeWork
RateBook
GetWeather
PlayMusic
SearchScreeningEvent
PlayMusic
GetWeather
SearchCreativeWork
BookRestaurant
AddToPlaylist
GetWeather
BookRestaurant
GetWeather
SearchScreeningEvent
PlayMusic
SearchCreativeWork
SearchCreativeWork
RateBook
RateBook
PlayMusic
GetWeather
GetWeather
BookRestaurant
AddToPlaylist
RateBook
BookRestaurant
SearchCreativeWork
GetWeather
BookRestaurant
GetWeather
GetWeather
AddToPlaylist
SearchCreativeWork
SearchCreativeWork
PlayMusic
RateBook
SearchCreativeWork
RateBook
SearchCreativeWork
AddToPlaylist
RateBook
SearchScreeningEvent
SearchCreativeWork
GetWeather
SearchScreeningEvent
SearchScreeningEvent
RateBook
AddToPlaylist
SearchCreativeWork
PlayMusic
BookRestaurant
AddToPlaylist
PlayMusic
RateBook
PlayMusic
AddToPlaylist
RateBook
AddToPlaylist
RateBook
PlayMusic
BookRestaurant
SearchScreeningEvent
SearchScreeningEvent
SearchCreativeWork
SearchScreeningEvent
SearchCreativeWork
BookRestaurant
SearchScreeningEvent
AddToPlaylist
RateBook
RateBook
PlayMusic
PlayMusic
SearchScreeningEvent
RateBook
SearchScreeningEvent
RateBook
SearchScreeningEvent
PlayMusic
RateBook
SearchCreativeWork
SearchScreeningEvent
PlayMusic
RateBook
SearchScreeningEvent
PlayMusic
SearchCreativeWork
PlayMusic
BookRestaurant
SearchCreativeWork
RateBook
BookRestaurant
AddToPlaylist
PlayMusic
GetWeather
PlayMusic
RateBook
BookRestaurant
RateBook
RateBook
PlayMusic
GetWeather
BookRestaurant
PlayMusic
RateBook
SearchCreativeWork
BookRestaurant
BookRestaurant
GetWeather
AddToPlaylist
GetWeather
RateBook
GetWeather
GetWeather
PlayMusic
GetWeather
GetWeather
BookRestaurant
SearchScreeningEvent
SearchScreeningEvent
PlayMusic
PlayMusic
RateBook
SearchScreeningEvent
SearchCreativeWork
SearchCreativeWork
BookRestaurant
GetWeather
SearchScreeningEvent
SearchScreeningEvent
RateBook
SearchScreeningEvent
SearchScreeningEvent
RateBook
RateBook
RateBook
PlayMusic
SearchCreativeWork
AddToPlaylist
RateBook
AddToPlaylist
BookRestaurant
PlayMusic
SearchCreativeWork
RateBook
SearchScreeningEvent
PlayMusic
SearchScreeningEvent
PlayMusic
GetWeather
BookRestaurant
PlayMusic
RateBook
RateBook
SearchCreativeWork
SearchScreeningEvent
SearchCreativeWork
SearchCreativeWork
AddToPlaylist
BookRestaurant
RateBook
AddToPlaylist
SearchScreeningEvent
RateBook
BookRestaurant
BookRestaurant
SearchScreeningEvent
BookRestaurant
PlayMusic
SearchCreativeWork
RateBook
AddToPlaylist
SearchScreeningEvent
GetWeather
BookRestaurant
SearchScreeningEvent
RateBook
GetWeather
PlayMusic
GetWeather
SearchCreativeWork
SearchCreativeWork
SearchScreeningEvent
GetWeather
GetWeather
GetWeather
PlayMusic
BookRestaurant
BookRestaurant
RateBook
RateBook
RateBook
AddToPlaylist
AddToPlaylist
SearchCreativeWork
RateBook
AddToPlaylist
AddToPlaylist
GetWeather
SearchScreeningEvent
SearchCreativeWork
SearchCreativeWork
GetWeather
GetWeather
BookRestaurant
RateBook
SearchCreativeWork
PlayMusic
BookRestaurant
SearchScreeningEvent
BookRestaurant
GetWeather
BookRestaurant
RateBook
BookRestaurant
PlayMusic
BookRestaurant
SearchScreeningEvent
SearchScreeningEvent
GetWeather
GetWeather
PlayMusic
GetWeather
SearchScreeningEvent
SearchCreativeWork
SearchScreeningEvent
PlayMusic
SearchScreeningEvent
AddToPlaylist
SearchScreeningEvent
SearchScreeningEvent
PlayMusic
PlayMusic
PlayMusic
SearchCreativeWork
GetWeather
PlayMusic
SearchCreativeWork
SearchScreeningEvent
SearchCreativeWork
PlayMusic
SearchCreativeWork
PlayMusic
SearchScreeningEvent
BookRestaurant
SearchScreeningEvent
RateBook
SearchScreeningEvent
GetWeather
SearchCreativeWork
SearchCreativeWork
AddToPlaylist
PlayMusic
BookRestaurant
BookRestaurant
PlayMusic
SearchScreeningEvent
SearchCreativeWork
BookRestaurant
PlayMusic
SearchCreativeWork
SearchScreeningEvent
GetWeather
PlayMusic
RateBook
RateBook
SearchCreativeWork
PlayMusic
RateBook
RateBook
SearchCreativeWork
BookRestaurant
SearchCreativeWork
SearchScreeningEvent
RateBook
GetWeather
PlayMusic
GetWeather
GetWeather
AddToPlaylist
GetWeather
SearchScreeningEvent
GetWeather
AddToPlaylist
GetWeather
SearchCreativeWork
GetWeather
BookRestaurant
RateBook
SearchCreativeWork
AddToPlaylist
PlayMusic
BookRestaurant
GetWeather
RateBook
GetWeather
PlayMusic
SearchCreativeWork
SearchCreativeWork
AddToPlaylist
AddToPlaylist
SearchScreeningEvent
GetWeather
BookRestaurant
GetWeather
PlayMusic
AddToPlaylist
AddToPlaylist
GetWeather
BookRestaurant
PlayMusic
PlayMusic
GetWeather
AddToPlaylist
GetWeather
PlayMusic
AddToPlaylist
SearchCreativeWork
RateBook
SearchScreeningEvent
PlayMusic
BookRestaurant
PlayMusic
SearchScreeningEvent
AddToPlaylist
RateBook
RateBook
PlayMusic
SearchScreeningEvent
GetWeather
PlayMusic
RateBook
BookRestaurant
RateBook
SearchScreeningEvent
SearchCreativeWork
SearchCreativeWork
SearchCreativeWork
SearchScreeningEvent
SearchScreeningEvent
SearchScreeningEvent
AddToPlaylist
AddToPlaylist
PlayMusic
BookRestaurant
SearchScreeningEvent
GetWeather
GetWeather
AddToPlaylist
SearchCreativeWork
RateBook
AddToPlaylist
SearchCreativeWork
GetWeather
PlayMusic
BookRestaurant
RateBook
BookRestaurant
AddToPlaylist
AddToPlaylist
BookRestaurant
BookRestaurant
BookRestaurant
SearchScreeningEvent
GetWeather
BookRestaurant
RateBook
PlayMusic
BookRestaurant
SearchCreativeWork
SearchCreativeWork
BookRestaurant
SearchCreativeWork
BookRestaurant
GetWeather
AddToPlaylist
AddToPlaylist
SearchScreeningEvent
GetWeather
PlayMusic
PlayMusic
BookRestaurant
SearchScreeningEvent
GetWeather
SearchCreativeWork
RateBook
SearchScreeningEvent
AddToPlaylist
SearchScreeningEvent
PlayMusic
SearchScreeningEvent
SearchScreeningEvent
GetWeather
SearchScreeningEvent
GetWeather
RateBook
BookRestaurant
SearchScreeningEvent
RateBook
SearchCreativeWork
AddToPlaylist
SearchScreeningEvent
BookRestaurant
SearchScreeningEvent
AddToPlaylist
BookRestaurant
RateBook
GetWeather
PlayMusic
RateBook
BookRestaurant
RateBook
AddToPlaylist
PlayMusic
SearchScreeningEvent
GetWeather
RateBook
SearchCreativeWork
GetWeather
BookRestaurant
SearchCreativeWork
SearchScreeningEvent
AddToPlaylist
SearchScreeningEvent
PlayMusic
SearchCreativeWork
SearchScreeningEvent
RateBook
RateBook
AddToPlaylist
SearchScreeningEvent
SearchScreeningEvent
GetWeather
SearchCreativeWork
BookRestaurant
RateBook
RateBook
SearchScreeningEvent
RateBook
SearchCreativeWork
GetWeather
RateBook
BookRestaurant
SearchCreativeWork
PlayMusic
PlayMusic
BookRestaurant
RateBook
BookRestaurant
SearchScreeningEvent
RateBook
SearchCreativeWork
SearchScreeningEvent
GetWeather
AddToPlaylist
BookRestaurant
SearchCreativeWork
PlayMusic
GetWeather
SearchScreeningEvent
AddToPlaylist
BookRestaurant
GetWeather
BookRestaurant
SearchCreativeWork
BookRestaurant
RateBook
GetWeather
SearchCreativeWork
BookRestaurant
AddToPlaylist
RateBook
PlayMusic
BookRestaurant
GetWeather
PlayMusic
GetWeather
SearchScreeningEvent
SearchCreativeWork
BookRestaurant
SearchScreeningEvent
AddToPlaylist
AddToPlaylist
SearchScreeningEvent
GetWeather
GetWeather
SearchCreativeWork
SearchScreeningEvent
RateBook
BookRestaurant
SearchCreativeWork
PlayMusic
SearchCreativeWork
GetWeather
AddToPlaylist
SearchCreativeWork
AddToPlaylist
GetWeather
PlayMusic
SearchCreativeWork
SearchCreativeWork
GetWeather
SearchScreeningEvent
RateBook
AddToPlaylist
SearchCreativeWork
RateBook
SearchCreativeWork
SearchScreeningEvent
AddToPlaylist
PlayMusic
GetWeather
PlayMusic
RateBook
SearchCreativeWork
GetWeather
RateBook
AddToPlaylist
PlayMusic
BookRestaurant
SearchScreeningEvent
BookRestaurant
AddToPlaylist
BookRestaurant
BookRestaurant
RateBook
SearchScreeningEvent
BookRestaurant
AddToPlaylist
SearchCreativeWork
RateBook
GetWeather
BookRestaurant
GetWeather
SearchCreativeWork
SearchCreativeWork
RateBook
PlayMusic
AddToPlaylist
BookRestaurant
RateBook
GetWeather
GetWeather
RateBook
AddToPlaylist
GetWeather
RateBook
BookRestaurant
GetWeather
AddToPlaylist
AddToPlaylist
RateBook
AddToPlaylist
RateBook
RateBook
SearchScreeningEvent
AddToPlaylist
PlayMusic
AddToPlaylist
SearchScreeningEvent
AddToPlaylist
BookRestaurant
AddToPlaylist
BookRestaurant
RateBook
GetWeather
AddToPlaylist
RateBook
SearchScreeningEvent
BookRestaurant
BookRestaurant
RateBook
GetWeather
SearchScreeningEvent
SearchCreativeWork
BookRestaurant
SearchScreeningEvent
SearchScreeningEvent
SearchCreativeWork
SearchCreativeWork
PlayMusic
SearchCreativeWork
BookRestaurant
SearchCreativeWork
PlayMusic
AddToPlaylist
SearchCreativeWork
BookRestaurant
GetWeather
PlayMusic
SearchScreeningEvent
AddToPlaylist
BookRestaurant
BookRestaurant
SearchCreativeWork
RateBook
SearchScreeningEvent
AddToPlaylist
BookRestaurant
RateBook
PlayMusic
AddToPlaylist
SearchCreativeWork
PlayMusic
SearchScreeningEvent
SearchScreeningEvent
SearchCreativeWork
GetWeather
SearchScreeningEvent
SearchCreativeWork
GetWeather
SearchScreeningEvent
GetWeather
AddToPlaylist
BookRestaurant
SearchScreeningEvent
AddToPlaylist
SearchCreativeWork
RateBook
RateBook
SearchScreeningEvent
PlayMusic
SearchScreeningEvent
RateBook
SearchScreeningEvent
BookRestaurant
BookRestaurant
GetWeather
SearchScreeningEvent
SearchCreativeWork
GetWeather
GetWeather
PlayMusic
PlayMusic
PlayMusic
RateBook
GetWeather
RateBook
SearchCreativeWork
GetWeather
SearchCreativeWork
PlayMusic
BookRestaurant
GetWeather
BookRestaurant
AddToPlaylist
BookRestaurant
SearchCreativeWork
AddToPlaylist
SearchScreeningEvent
GetWeather
AddToPlaylist
SearchScreeningEvent
GetWeather
GetWeather
AddToPlaylist
SearchScreeningEvent
BookRestaurant
AddToPlaylist
GetWeather
SearchScreeningEvent
AddToPlaylist
BookRestaurant
AddToPlaylist
GetWeather
SearchScreeningEvent
AddToPlaylist
SearchCreativeWork
AddToPlaylist
SearchScreeningEvent
SearchScreeningEvent
RateBook
SearchCreativeWork
GetWeather
RateBook
GetWeather
SearchCreativeWork
SearchScreeningEvent
PlayMusic
SearchScreeningEvent
AddToPlaylist
BookRestaurant
SearchScreeningEvent
RateBook
PlayMusic
SearchCreativeWork
RateBook
SearchScreeningEvent
RateBook
BookRestaurant
RateBook
PlayMusic
SearchScreeningEvent
BookRestaurant
GetWeather
RateBook
RateBook
AddToPlaylist
SearchCreativeWork
PlayMusic
BookRestaurant
AddToPlaylist
PlayMusic
GetWeather
PlayMusic
RateBook
SearchScreeningEvent
SearchScreeningEvent
SearchCreativeWork
PlayMusic
GetWeather
RateBook
SearchCreativeWork
BookRestaurant
BookRestaurant
BookRestaurant
SearchCreativeWork
SearchCreativeWork
GetWeather
BookRestaurant
RateBook
BookRestaurant
RateBook
SearchCreativeWork
GetWeather
PlayMusic
AddToPlaylist
AddToPlaylist
RateBook
SearchScreeningEvent
GetWeather
AddToPlaylist
BookRestaurant
BookRestaurant
PlayMusic
AddToPlaylist
SearchCreativeWork
SearchCreativeWork
PlayMusic
GetWeather
SearchScreeningEvent
AddToPlaylist
PlayMusic
RateBook
PlayMusic
SearchCreativeWork
BookRestaurant
SearchScreeningEvent
SearchScreeningEvent
AddToPlaylist
SearchScreeningEvent
AddToPlaylist
AddToPlaylist
BookRestaurant
SearchCreativeWork
BookRestaurant
SearchCreativeWork
GetWeather
RateBook
BookRestaurant
AddToPlaylist
AddToPlaylist
SearchScreeningEvent
SearchCreativeWork
RateBook
BookRestaurant
GetWeather
BookRestaurant
RateBook
RateBook
SearchCreativeWork
AddToPlaylist
GetWeather
BookRestaurant
RateBook
SearchCreativeWork
PlayMusic
GetWeather
SearchScreeningEvent
GetWeather
SearchCreativeWork
PlayMusic
GetWeather
RateBook
PlayMusic
RateBook
BookRestaurant
GetWeather
RateBook
GetWeather
SearchCreativeWork
RateBook
RateBook
GetWeather
SearchScreeningEvent
PlayMusic
SearchCreativeWork
SearchCreativeWork
BookRestaurant
GetWeather
PlayMusic
SearchCreativeWork
PlayMusic
GetWeather
RateBook
SearchScreeningEvent
RateBook
RateBook
SearchCreativeWork
AddToPlaylist
AddToPlaylist
SearchScreeningEvent
RateBook
GetWeather
SearchScreeningEvent
BookRestaurant
GetWeather
BookRestaurant
PlayMusic
SearchScreeningEvent
SearchScreeningEvent
BookRestaurant
AddToPlaylist
SearchCreativeWork
PlayMusic
PlayMusic
SearchScreeningEvent
GetWeather
BookRestaurant
SearchScreeningEvent
RateBook
GetWeather
AddToPlaylist
RateBook
GetWeather
SearchScreeningEvent
GetWeather
GetWeather
PlayMusic
BookRestaurant
SearchCreativeWork
GetWeather
RateBook
RateBook
PlayMusic
AddToPlaylist
RateBook
SearchScreeningEvent
AddToPlaylist
GetWeather
PlayMusic
RateBook
AddToPlaylist
AddToPlaylist
RateBook
GetWeather
SearchCreativeWork
BookRestaurant
RateBook
PlayMusic
RateBook
SearchScreeningEvent
RateBook
SearchScreeningEvent
BookRestaurant
SearchCreativeWork
RateBook
SearchScreeningEvent
SearchScreeningEvent
SearchCreativeWork
SearchScreeningEvent
PlayMusic
SearchCreativeWork
BookRestaurant
AddToPlaylist
BookRestaurant
BookRestaurant
GetWeather
SearchCreativeWork
RateBook
GetWeather
SearchScreeningEvent
PlayMusic
SearchCreativeWork
GetWeather
GetWeather
RateBook
GetWeather
AddToPlaylist
RateBook
RateBook
RateBook
RateBook
AddToPlaylist
RateBook
SearchScreeningEvent
SearchScreeningEvent
SearchCreativeWork
BookRestaurant
AddToPlaylist
GetWeather
SearchCreativeWork
AddToPlaylist
PlayMusic
SearchCreativeWork
SearchScreeningEvent
SearchCreativeWork
SearchCreativeWork
SearchScreeningEvent
AddToPlaylist
AddToPlaylist
SearchCreativeWork
BookRestaurant
AddToPlaylist
BookRestaurant
AddToPlaylist
GetWeather
SearchCreativeWork
AddToPlaylist
GetWeather
PlayMusic
RateBook
SearchCreativeWork
PlayMusic
AddToPlaylist
GetWeather
SearchScreeningEvent
GetWeather
AddToPlaylist
GetWeather
SearchScreeningEvent
SearchScreeningEvent
GetWeather
AddToPlaylist
SearchCreativeWork
SearchScreeningEvent
SearchCreativeWork
RateBook
SearchCreativeWork
AddToPlaylist
SearchScreeningEvent
SearchCreativeWork
RateBook
BookRestaurant
GetWeather
AddToPlaylist
SearchCreativeWork
GetWeather
SearchScreeningEvent
PlayMusic
GetWeather
AddToPlaylist
BookRestaurant
RateBook
AddToPlaylist
SearchScreeningEvent
BookRestaurant
AddToPlaylist
PlayMusic
BookRestaurant
PlayMusic
PlayMusic
PlayMusic
GetWeather
SearchCreativeWork
SearchScreeningEvent
PlayMusic
GetWeather
RateBook
PlayMusic
PlayMusic
RateBook
SearchCreativeWork
AddToPlaylist
AddToPlaylist
SearchCreativeWork
SearchCreativeWork
GetWeather
AddToPlaylist
GetWeather
RateBook
GetWeather
AddToPlaylist
SearchScreeningEvent
AddToPlaylist
BookRestaurant
PlayMusic
BookRestaurant
PlayMusic
SearchCreativeWork
SearchScreeningEvent
GetWeather
SearchScreeningEvent
GetWeather
PlayMusic
GetWeather
SearchCreativeWork
PlayMusic
PlayMusic
SearchCreativeWork
SearchScreeningEvent
SearchCreativeWork
GetWeather
PlayMusic
SearchScreeningEvent
GetWeather
SearchCreativeWork
SearchCreativeWork
AddToPlaylist
GetWeather
RateBook
SearchScreeningEvent
SearchCreativeWork
BookRestaurant
PlayMusic
SearchCreativeWork
SearchScreeningEvent
AddToPlaylist
BookRestaurant
RateBook
SearchCreativeWork
SearchCreativeWork
GetWeather
GetWeather
GetWeather
GetWeather
RateBook
BookRestaurant
SearchCreativeWork
RateBook
PlayMusic
BookRestaurant
BookRestaurant
AddToPlaylist
SearchCreativeWork
SearchScreeningEvent
AddToPlaylist
PlayMusic
RateBook
PlayMusic
AddToPlaylist
GetWeather
BookRestaurant
AddToPlaylist
BookRestaurant
BookRestaurant
GetWeather
PlayMusic
PlayMusic
PlayMusic
SearchScreeningEvent
SearchCreativeWork
RateBook
BookRestaurant
AddToPlaylist
SearchScreeningEvent
AddToPlaylist
BookRestaurant
RateBook
RateBook
AddToPlaylist
BookRestaurant
GetWeather
SearchScreeningEvent
RateBook
SearchScreeningEvent
SearchScreeningEvent
RateBook
GetWeather
PlayMusic
BookRestaurant
SearchCreativeWork
BookRestaurant
PlayMusic
PlayMusic
SearchScreeningEvent
GetWeather
RateBook
GetWeather
BookRestaurant
PlayMusic
RateBook
SearchCreativeWork
SearchScreeningEvent
SearchScreeningEvent
PlayMusic
AddToPlaylist
RateBook
GetWeather
RateBook
AddToPlaylist
RateBook
BookRestaurant
SearchCreativeWork
SearchScreeningEvent
RateBook
SearchScreeningEvent
SearchCreativeWork
SearchCreativeWork
BookRestaurant
AddToPlaylist
BookRestaurant
GetWeather
SearchScreeningEvent
RateBook
GetWeather
SearchCreativeWork
SearchScreeningEvent
RateBook
SearchScreeningEvent
PlayMusic
AddToPlaylist
BookRestaurant
AddToPlaylist
AddToPlaylist
SearchScreeningEvent
AddToPlaylist
SearchCreativeWork
AddToPlaylist
SearchCreativeWork
RateBook
PlayMusic
GetWeather
GetWeather
GetWeather
PlayMusic
PlayMusic
SearchCreativeWork
BookRestaurant
PlayMusic
RateBook
SearchScreeningEvent
GetWeather
PlayMusic
PlayMusic
RateBook
SearchCreativeWork
BookRestaurant
SearchCreativeWork
BookRestaurant
PlayMusic
PlayMusic
RateBook
SearchCreativeWork
BookRestaurant
SearchCreativeWork
AddToPlaylist
RateBook
AddToPlaylist
GetWeather
GetWeather
BookRestaurant
PlayMusic
BookRestaurant
GetWeather
GetWeather
RateBook
BookRestaurant
RateBook
SearchCreativeWork
RateBook
PlayMusic
BookRestaurant
RateBook
BookRestaurant
SearchScreeningEvent
RateBook
AddToPlaylist
SearchCreativeWork
BookRestaurant
RateBook
BookRestaurant
AddToPlaylist
SearchCreativeWork
BookRestaurant
RateBook
AddToPlaylist
SearchCreativeWork
AddToPlaylist
BookRestaurant
RateBook
GetWeather
SearchCreativeWork
PlayMusic
RateBook
SearchScreeningEvent
GetWeather
AddToPlaylist
SearchCreativeWork
GetWeather
GetWeather
GetWeather
BookRestaurant
GetWeather
BookRestaurant
AddToPlaylist
SearchScreeningEvent
AddToPlaylist
PlayMusic
RateBook
BookRestaurant
SearchScreeningEvent
PlayMusic
GetWeather
GetWeather
SearchScreeningEvent
SearchScreeningEvent
RateBook
SearchCreativeWork
GetWeather
SearchScreeningEvent
RateBook
PlayMusic
GetWeather
SearchCreativeWork
PlayMusic
RateBook
AddToPlaylist
RateBook
SearchCreativeWork
AddToPlaylist
BookRestaurant
PlayMusic
SearchCreativeWork
RateBook
AddToPlaylist
SearchCreativeWork
BookRestaurant
RateBook
RateBook
SearchScreeningEvent
RateBook
GetWeather
AddToPlaylist
AddToPlaylist
AddToPlaylist
RateBook
PlayMusic
AddToPlaylist
PlayMusic
PlayMusic
PlayMusic
BookRestaurant
GetWeather
PlayMusic
AddToPlaylist
SearchScreeningEvent
GetWeather
SearchCreativeWork
BookRestaurant
SearchScreeningEvent
PlayMusic
PlayMusic
RateBook
BookRestaurant
SearchScreeningEvent
GetWeather
AddToPlaylist
SearchCreativeWork
PlayMusic
PlayMusic
SearchCreativeWork
PlayMusic
RateBook
SearchCreativeWork
SearchCreativeWork
SearchScreeningEvent
BookRestaurant
SearchScreeningEvent
GetWeather
RateBook
PlayMusic
AddToPlaylist
GetWeather
PlayMusic
GetWeather
GetWeather
RateBook
SearchCreativeWork
SearchScreeningEvent
SearchScreeningEvent
AddToPlaylist
PlayMusic
GetWeather
SearchScreeningEvent
BookRestaurant
BookRestaurant
PlayMusic
BookRestaurant
GetWeather
SearchCreativeWork
PlayMusic
PlayMusic
SearchCreativeWork
SearchScreeningEvent
SearchScreeningEvent
RateBook
SearchCreativeWork
SearchScreeningEvent
PlayMusic
BookRestaurant
BookRestaurant
SearchCreativeWork
GetWeather
SearchScreeningEvent
PlayMusic
SearchScreeningEvent
GetWeather
BookRestaurant
BookRestaurant
BookRestaurant
GetWeather
SearchCreativeWork
SearchCreativeWork
SearchCreativeWork
PlayMusic
SearchScreeningEvent
PlayMusic
PlayMusic
AddToPlaylist
SearchCreativeWork
RateBook
PlayMusic
SearchCreativeWork
SearchCreativeWork
SearchCreativeWork
SearchCreativeWork
RateBook
PlayMusic
PlayMusic
GetWeather
SearchScreeningEvent
GetWeather
SearchCreativeWork
GetWeather
BookRestaurant
GetWeather
RateBook
BookRestaurant
GetWeather
GetWeather
SearchCreativeWork
SearchScreeningEvent
PlayMusic
RateBook
GetWeather
SearchScreeningEvent
RateBook
RateBook
AddToPlaylist
AddToPlaylist
SearchCreativeWork
AddToPlaylist
BookRestaurant
BookRestaurant
BookRestaurant
SearchScreeningEvent
SearchScreeningEvent
SearchCreativeWork
SearchScreeningEvent
PlayMusic
RateBook
PlayMusic
PlayMusic
BookRestaurant
PlayMusic
GetWeather
GetWeather
PlayMusic
SearchScreeningEvent
AddToPlaylist
AddToPlaylist
BookRestaurant
BookRestaurant
BookRestaurant
SearchScreeningEvent
SearchCreativeWork
BookRestaurant
AddToPlaylist
GetWeather
SearchScreeningEvent
RateBook
BookRestaurant
BookRestaurant
RateBook
AddToPlaylist
BookRestaurant
SearchScreeningEvent
PlayMusic
GetWeather
SearchScreeningEvent
PlayMusic
SearchScreeningEvent
PlayMusic
SearchCreativeWork
AddToPlaylist
RateBook
BookRestaurant
BookRestaurant
SearchCreativeWork
PlayMusic
GetWeather
SearchCreativeWork
SearchCreativeWork
PlayMusic
AddToPlaylist
PlayMusic
BookRestaurant
GetWeather
BookRestaurant
PlayMusic
GetWeather
AddToPlaylist
SearchScreeningEvent
SearchScreeningEvent
PlayMusic
GetWeather
RateBook
PlayMusic
SearchScreeningEvent
PlayMusic
SearchCreativeWork
SearchScreeningEvent
GetWeather
GetWeather
AddToPlaylist
AddToPlaylist
SearchScreeningEvent
SearchCreativeWork
BookRestaurant
RateBook
SearchCreativeWork
BookRestaurant
AddToPlaylist
BookRestaurant
AddToPlaylist
GetWeather
GetWeather
SearchScreeningEvent
RateBook
RateBook
SearchCreativeWork
RateBook
AddToPlaylist
SearchScreeningEvent
GetWeather
RateBook
SearchScreeningEvent
SearchScreeningEvent
SearchScreeningEvent
SearchCreativeWork
BookRestaurant
PlayMusic
SearchScreeningEvent
GetWeather
GetWeather
SearchCreativeWork
BookRestaurant
AddToPlaylist
GetWeather
PlayMusic
BookRestaurant
SearchCreativeWork
PlayMusic
GetWeather
GetWeather
SearchScreeningEvent
SearchScreeningEvent
BookRestaurant
RateBook
AddToPlaylist
SearchScreeningEvent
SearchScreeningEvent
RateBook
SearchScreeningEvent
RateBook
SearchScreeningEvent
RateBook
AddToPlaylist
RateBook
PlayMusic
GetWeather
GetWeather
RateBook
SearchCreativeWork
AddToPlaylist
RateBook
GetWeather
SearchScreeningEvent
RateBook
SearchCreativeWork
PlayMusic
AddToPlaylist
SearchScreeningEvent
PlayMusic
BookRestaurant
GetWeather
SearchScreeningEvent
PlayMusic
RateBook
SearchCreativeWork
BookRestaurant
GetWeather
RateBook
SearchScreeningEvent
SearchScreeningEvent
GetWeather
RateBook
SearchCreativeWork
PlayMusic
SearchScreeningEvent
PlayMusic
GetWeather
GetWeather
SearchScreeningEvent
BookRestaurant
AddToPlaylist
SearchScreeningEvent
BookRestaurant
GetWeather
GetWeather
BookRestaurant
SearchCreativeWork
GetWeather
PlayMusic
AddToPlaylist
SearchCreativeWork
BookRestaurant
SearchScreeningEvent
SearchCreativeWork
AddToPlaylist
BookRestaurant
GetWeather
BookRestaurant
AddToPlaylist
PlayMusic
AddToPlaylist
SearchScreeningEvent
RateBook
PlayMusic
BookRestaurant
AddToPlaylist
SearchCreativeWork
GetWeather
PlayMusic
PlayMusic
PlayMusic
GetWeather
SearchCreativeWork
BookRestaurant
BookRestaurant
GetWeather
AddToPlaylist
GetWeather
SearchScreeningEvent
AddToPlaylist
BookRestaurant
PlayMusic
AddToPlaylist
GetWeather
AddToPlaylist
SearchScreeningEvent
SearchCreativeWork
BookRestaurant
PlayMusic
PlayMusic
AddToPlaylist
SearchScreeningEvent
PlayMusic
BookRestaurant
AddToPlaylist
RateBook
GetWeather
GetWeather
RateBook
SearchCreativeWork
GetWeather
AddToPlaylist
RateBook
PlayMusic
RateBook
SearchCreativeWork
AddToPlaylist
RateBook
PlayMusic
RateBook
AddToPlaylist
AddToPlaylist
SearchCreativeWork
SearchCreativeWork
SearchCreativeWork
AddToPlaylist
GetWeather
SearchScreeningEvent
SearchCreativeWork
RateBook
SearchScreeningEvent
RateBook
BookRestaurant
PlayMusic
GetWeather
AddToPlaylist
PlayMusic
AddToPlaylist
GetWeather
RateBook
PlayMusic
SearchScreeningEvent
GetWeather
BookRestaurant
SearchScreeningEvent
SearchScreeningEvent
GetWeather
GetWeather
GetWeather
BookRestaurant
SearchScreeningEvent
RateBook
SearchScreeningEvent
GetWeather
SearchScreeningEvent
PlayMusic
AddToPlaylist
AddToPlaylist
RateBook
SearchScreeningEvent
GetWeather
SearchCreativeWork
PlayMusic
SearchCreativeWork
PlayMusic
BookRestaurant
BookRestaurant
PlayMusic
SearchCreativeWork
AddToPlaylist
SearchScreeningEvent
AddToPlaylist
SearchScreeningEvent
RateBook
RateBook
PlayMusic
SearchCreativeWork
PlayMusic
SearchScreeningEvent
BookRestaurant
RateBook
SearchCreativeWork
PlayMusic
BookRestaurant
RateBook
BookRestaurant
SearchCreativeWork
SearchCreativeWork
PlayMusic
RateBook
AddToPlaylist
SearchScreeningEvent
SearchCreativeWork
SearchCreativeWork
BookRestaurant
SearchCreativeWork
BookRestaurant
RateBook
SearchScreeningEvent
RateBook
BookRestaurant
PlayMusic
GetWeather
GetWeather
SearchScreeningEvent
PlayMusic
SearchScreeningEvent
SearchCreativeWork
SearchScreeningEvent
RateBook
PlayMusic
AddToPlaylist
BookRestaurant
GetWeather
SearchScreeningEvent
SearchScreeningEvent
BookRestaurant
SearchScreeningEvent
GetWeather
AddToPlaylist
AddToPlaylist
SearchScreeningEvent
GetWeather
AddToPlaylist
AddToPlaylist
SearchCreativeWork
SearchCreativeWork
PlayMusic
GetWeather
GetWeather
BookRestaurant
RateBook
AddToPlaylist
SearchCreativeWork
RateBook
SearchCreativeWork
GetWeather
PlayMusic
SearchCreativeWork
PlayMusic
RateBook
SearchCreativeWork
BookRestaurant
PlayMusic
SearchCreativeWork
PlayMusic
RateBook
PlayMusic
AddToPlaylist
SearchScreeningEvent
RateBook
AddToPlaylist
SearchCreativeWork
RateBook
GetWeather
PlayMusic
SearchScreeningEvent
RateBook
PlayMusic
SearchCreativeWork
RateBook
SearchScreeningEvent
GetWeather
SearchScreeningEvent
RateBook
SearchScreeningEvent
RateBook
BookRestaurant
RateBook
GetWeather
AddToPlaylist
GetWeather
PlayMusic
GetWeather
AddToPlaylist
PlayMusic
GetWeather
GetWeather
SearchCreativeWork
PlayMusic
BookRestaurant
SearchCreativeWork
AddToPlaylist
GetWeather
SearchScreeningEvent
BookRestaurant
SearchCreativeWork
SearchScreeningEvent
BookRestaurant
BookRestaurant
BookRestaurant
AddToPlaylist
GetWeather
BookRestaurant
SearchScreeningEvent
BookRestaurant
SearchScreeningEvent
RateBook
RateBook
GetWeather
PlayMusic
SearchCreativeWork
RateBook
PlayMusic
RateBook
SearchScreeningEvent
SearchScreeningEvent
RateBook
SearchScreeningEvent
SearchCreativeWork
SearchCreativeWork
SearchScreeningEvent
GetWeather
RateBook
SearchCreativeWork
SearchScreeningEvent
PlayMusic
SearchScreeningEvent
BookRestaurant
SearchCreativeWork
GetWeather
SearchCreativeWork
SearchCreativeWork
AddToPlaylist
GetWeather
PlayMusic
RateBook
AddToPlaylist
GetWeather
SearchScreeningEvent
AddToPlaylist
SearchCreativeWork
PlayMusic
BookRestaurant
SearchCreativeWork
SearchScreeningEvent
SearchCreativeWork
GetWeather
SearchCreativeWork
GetWeather
SearchCreativeWork
GetWeather
SearchCreativeWork
SearchCreativeWork
SearchScreeningEvent
GetWeather
PlayMusic
PlayMusic
SearchCreativeWork
PlayMusic
SearchCreativeWork
BookRestaurant
RateBook
GetWeather
SearchCreativeWork
BookRestaurant
RateBook
SearchScreeningEvent
PlayMusic
SearchScreeningEvent
SearchScreeningEvent
BookRestaurant
AddToPlaylist
SearchCreativeWork
AddToPlaylist
SearchScreeningEvent
BookRestaurant
SearchCreativeWork
PlayMusic
GetWeather
AddToPlaylist
RateBook
PlayMusic
RateBook
GetWeather
AddToPlaylist
PlayMusic
SearchScreeningEvent
SearchScreeningEvent
SearchScreeningEvent
SearchCreativeWork
RateBook
GetWeather
SearchCreativeWork
PlayMusic
SearchScreeningEvent
BookRestaurant
PlayMusic
AddToPlaylist
RateBook
RateBook
SearchCreativeWork
SearchCreativeWork
RateBook
AddToPlaylist
BookRestaurant
RateBook
AddToPlaylist
SearchCreativeWork
SearchScreeningEvent
GetWeather
AddToPlaylist
GetWeather
AddToPlaylist
SearchScreeningEvent
SearchCreativeWork
SearchCreativeWork
BookRestaurant
SearchScreeningEvent
AddToPlaylist
BookRestaurant
GetWeather
BookRestaurant
PlayMusic
SearchCreativeWork
BookRestaurant
SearchCreativeWork
BookRestaurant
SearchCreativeWork
SearchScreeningEvent
BookRestaurant
AddToPlaylist
GetWeather
PlayMusic
SearchScreeningEvent
SearchScreeningEvent
SearchScreeningEvent
RateBook
RateBook
AddToPlaylist
PlayMusic
SearchCreativeWork
SearchScreeningEvent
RateBook
BookRestaurant
BookRestaurant
SearchScreeningEvent
AddToPlaylist
SearchScreeningEvent
AddToPlaylist
SearchScreeningEvent
RateBook
PlayMusic
BookRestaurant
RateBook
GetWeather
GetWeather
SearchCreativeWork
SearchScreeningEvent
BookRestaurant
SearchCreativeWork
SearchCreativeWork
RateBook
GetWeather
GetWeather
SearchScreeningEvent
SearchScreeningEvent
GetWeather
AddToPlaylist
BookRestaurant
RateBook
RateBook
BookRestaurant
RateBook
SearchScreeningEvent
RateBook
SearchScreeningEvent
BookRestaurant
BookRestaurant
RateBook
RateBook
SearchScreeningEvent
RateBook
PlayMusic
SearchCreativeWork
PlayMusic
RateBook
AddToPlaylist
PlayMusic
PlayMusic
PlayMusic
PlayMusic
RateBook
SearchScreeningEvent
SearchCreativeWork
SearchScreeningEvent
SearchScreeningEvent
SearchCreativeWork
RateBook
GetWeather
PlayMusic
SearchScreeningEvent
AddToPlaylist
AddToPlaylist
AddToPlaylist
AddToPlaylist
SearchCreativeWork
SearchCreativeWork
AddToPlaylist
GetWeather
GetWeather
PlayMusic
GetWeather
GetWeather
SearchScreeningEvent
RateBook
SearchScreeningEvent
AddToPlaylist
RateBook
SearchCreativeWork
GetWeather
SearchScreeningEvent
BookRestaurant
GetWeather
SearchCreativeWork
RateBook
RateBook
RateBook
SearchScreeningEvent
RateBook
SearchCreativeWork
BookRestaurant
BookRestaurant
RateBook
BookRestaurant
SearchCreativeWork
GetWeather
RateBook
BookRestaurant
GetWeather
BookRestaurant
BookRestaurant
AddToPlaylist
AddToPlaylist
RateBook
RateBook
SearchCreativeWork
SearchScreeningEvent
SearchScreeningEvent
SearchScreeningEvent
AddToPlaylist
PlayMusic
RateBook
SearchScreeningEvent
AddToPlaylist
SearchCreativeWork
BookRestaurant
PlayMusic
SearchCreativeWork
AddToPlaylist
SearchScreeningEvent
BookRestaurant
GetWeather
RateBook
GetWeather
AddToPlaylist
RateBook
GetWeather
AddToPlaylist
SearchScreeningEvent
GetWeather
GetWeather
PlayMusic
SearchCreativeWork
PlayMusic
PlayMusic
SearchScreeningEvent
BookRestaurant
SearchScreeningEvent
BookRestaurant
AddToPlaylist
GetWeather
SearchCreativeWork
AddToPlaylist
SearchCreativeWork
SearchScreeningEvent
BookRestaurant
BookRestaurant
AddToPlaylist
GetWeather
SearchScreeningEvent
AddToPlaylist
SearchCreativeWork
BookRestaurant
GetWeather
BookRestaurant
RateBook
AddToPlaylist
PlayMusic
AddToPlaylist
SearchScreeningEvent
GetWeather
SearchScreeningEvent
GetWeather
RateBook
BookRestaurant
GetWeather
SearchScreeningEvent
SearchScreeningEvent
SearchScreeningEvent
SearchScreeningEvent
SearchCreativeWork
GetWeather
PlayMusic
PlayMusic
RateBook
SearchScreeningEvent
BookRestaurant
SearchScreeningEvent
AddToPlaylist
BookRestaurant
SearchScreeningEvent
PlayMusic
SearchScreeningEvent
AddToPlaylist
RateBook
BookRestaurant
RateBook
RateBook
SearchCreativeWork
AddToPlaylist
PlayMusic
PlayMusic
SearchScreeningEvent
GetWeather
SearchCreativeWork
SearchCreativeWork
SearchCreativeWork
PlayMusic
RateBook
GetWeather
AddToPlaylist
SearchCreativeWork
RateBook
PlayMusic
AddToPlaylist
BookRestaurant
GetWeather
SearchScreeningEvent
SearchScreeningEvent
SearchScreeningEvent
AddToPlaylist
RateBook
RateBook
RateBook
SearchCreativeWork
SearchScreeningEvent
AddToPlaylist
SearchCreativeWork
SearchCreativeWork
BookRestaurant
GetWeather
BookRestaurant
SearchCreativeWork
RateBook
BookRestaurant
RateBook
GetWeather
SearchScreeningEvent
BookRestaurant
SearchCreativeWork
BookRestaurant
RateBook
RateBook
GetWeather
SearchScreeningEvent
SearchScreeningEvent
GetWeather
PlayMusic
RateBook
AddToPlaylist
AddToPlaylist
GetWeather
RateBook
BookRestaurant
GetWeather
GetWeather
AddToPlaylist
SearchCreativeWork
SearchCreativeWork
SearchScreeningEvent
SearchScreeningEvent
GetWeather
BookRestaurant
SearchCreativeWork
PlayMusic
PlayMusic
GetWeather
SearchCreativeWork
AddToPlaylist
RateBook
PlayMusic
AddToPlaylist
GetWeather
AddToPlaylist
GetWeather
GetWeather
AddToPlaylist
SearchScreeningEvent
RateBook
GetWeather
SearchScreeningEvent
GetWeather
SearchScreeningEvent
SearchCreativeWork
PlayMusic
SearchScreeningEvent
GetWeather
PlayMusic
SearchCreativeWork
AddToPlaylist
GetWeather
PlayMusic
GetWeather
GetWeather
AddToPlaylist
AddToPlaylist
GetWeather
GetWeather
BookRestaurant
PlayMusic
RateBook
GetWeather
SearchCreativeWork
SearchCreativeWork
PlayMusic
GetWeather
SearchCreativeWork
GetWeather
RateBook
AddToPlaylist
AddToPlaylist
RateBook
SearchCreativeWork
SearchScreeningEvent
SearchCreativeWork
GetWeather
GetWeather
PlayMusic
PlayMusic
SearchScreeningEvent
AddToPlaylist
RateBook
AddToPlaylist
BookRestaurant
GetWeather
BookRestaurant
BookRestaurant
PlayMusic
AddToPlaylist
AddToPlaylist
AddToPlaylist
GetWeather
PlayMusic
RateBook
SearchCreativeWork
AddToPlaylist
SearchCreativeWork
BookRestaurant
PlayMusic
GetWeather
PlayMusic
PlayMusic
SearchCreativeWork
AddToPlaylist
AddToPlaylist
SearchScreeningEvent
GetWeather
SearchScreeningEvent
PlayMusic
BookRestaurant
GetWeather
PlayMusic
GetWeather
PlayMusic
SearchScreeningEvent
RateBook
BookRestaurant
SearchScreeningEvent
GetWeather
SearchCreativeWork
GetWeather
RateBook
BookRestaurant
GetWeather
SearchScreeningEvent
GetWeather
SearchScreeningEvent
SearchCreativeWork
AddToPlaylist
SearchScreeningEvent
AddToPlaylist
SearchCreativeWork
RateBook
SearchCreativeWork
GetWeather
SearchCreativeWork
SearchCreativeWork
PlayMusic
PlayMusic
PlayMusic
GetWeather
SearchScreeningEvent
SearchCreativeWork
SearchCreativeWork
BookRestaurant
SearchScreeningEvent
AddToPlaylist
PlayMusic
RateBook
SearchScreeningEvent
SearchScreeningEvent
PlayMusic
AddToPlaylist
PlayMusic
PlayMusic
SearchCreativeWork
SearchCreativeWork
GetWeather
AddToPlaylist
PlayMusic
SearchScreeningEvent
AddToPlaylist
RateBook
SearchCreativeWork
GetWeather
SearchScreeningEvent
RateBook
PlayMusic
PlayMusic
GetWeather
RateBook
BookRestaurant
AddToPlaylist
PlayMusic
PlayMusic
RateBook
AddToPlaylist
BookRestaurant
SearchCreativeWork
SearchCreativeWork
SearchScreeningEvent
GetWeather
SearchCreativeWork
RateBook
RateBook
BookRestaurant
PlayMusic
BookRestaurant
GetWeather
SearchCreativeWork
GetWeather
AddToPlaylist
PlayMusic
SearchScreeningEvent
PlayMusic
BookRestaurant
BookRestaurant
SearchCreativeWork
BookRestaurant
PlayMusic
SearchScreeningEvent
AddToPlaylist
GetWeather
BookRestaurant
AddToPlaylist
RateBook
AddToPlaylist
AddToPlaylist
AddToPlaylist
GetWeather
BookRestaurant
SearchCreativeWork
AddToPlaylist
GetWeather
SearchScreeningEvent
RateBook
PlayMusic
PlayMusic
AddToPlaylist
PlayMusic
SearchScreeningEvent
PlayMusic
GetWeather
GetWeather
RateBook
PlayMusic
AddToPlaylist
SearchScreeningEvent
AddToPlaylist
PlayMusic
SearchScreeningEvent
SearchScreeningEvent
SearchCreativeWork
BookRestaurant
SearchCreativeWork
GetWeather
SearchScreeningEvent
BookRestaurant
SearchScreeningEvent
GetWeather
SearchCreativeWork
PlayMusic
SearchScreeningEvent
BookRestaurant
AddToPlaylist
RateBook
AddToPlaylist
RateBook
SearchScreeningEvent
PlayMusic
RateBook
BookRestaurant
RateBook
AddToPlaylist
SearchCreativeWork
PlayMusic
AddToPlaylist
BookRestaurant
BookRestaurant
GetWeather
SearchCreativeWork
SearchScreeningEvent
AddToPlaylist
RateBook
SearchScreeningEvent
GetWeather
GetWeather
AddToPlaylist
SearchCreativeWork
SearchCreativeWork
SearchCreativeWork
BookRestaurant
BookRestaurant
SearchScreeningEvent
GetWeather
SearchCreativeWork
SearchScreeningEvent
SearchScreeningEvent
AddToPlaylist
SearchScreeningEvent
SearchCreativeWork
SearchCreativeWork
RateBook
BookRestaurant
SearchScreeningEvent
BookRestaurant
SearchCreativeWork
PlayMusic
PlayMusic
RateBook
SearchCreativeWork
PlayMusic
SearchCreativeWork
GetWeather
RateBook
PlayMusic
PlayMusic
GetWeather
AddToPlaylist
AddToPlaylist
BookRestaurant
GetWeather
PlayMusic
AddToPlaylist
SearchScreeningEvent
GetWeather
RateBook
GetWeather
RateBook
SearchCreativeWork
RateBook
GetWeather
SearchCreativeWork
PlayMusic
BookRestaurant
RateBook
SearchScreeningEvent
GetWeather
AddToPlaylist
PlayMusic
RateBook
GetWeather
RateBook
AddToPlaylist
RateBook
SearchScreeningEvent
AddToPlaylist
PlayMusic
AddToPlaylist
SearchCreativeWork
AddToPlaylist
SearchCreativeWork
RateBook
GetWeather
SearchCreativeWork
GetWeather
BookRestaurant
AddToPlaylist
RateBook
RateBook
BookRestaurant
SearchCreativeWork
SearchCreativeWork
PlayMusic
SearchCreativeWork
RateBook
RateBook
PlayMusic
RateBook
PlayMusic
RateBook
BookRestaurant
RateBook
AddToPlaylist
SearchScreeningEvent
SearchScreeningEvent
GetWeather
SearchScreeningEvent
RateBook
SearchCreativeWork
AddToPlaylist
SearchCreativeWork
BookRestaurant
SearchScreeningEvent
SearchCreativeWork
SearchCreativeWork
RateBook
RateBook
RateBook
RateBook
AddToPlaylist
PlayMusic
BookRestaurant
SearchScreeningEvent
RateBook
SearchScreeningEvent
RateBook
RateBook
AddToPlaylist
PlayMusic
BookRestaurant
SearchScreeningEvent
AddToPlaylist
BookRestaurant
SearchScreeningEvent
SearchCreativeWork
SearchScreeningEvent
GetWeather
SearchCreativeWork
AddToPlaylist
GetWeather
SearchCreativeWork
SearchScreeningEvent
SearchCreativeWork
AddToPlaylist
RateBook
GetWeather
SearchScreeningEvent
GetWeather
PlayMusic
RateBook
SearchCreativeWork
RateBook
AddToPlaylist
AddToPlaylist
GetWeather
AddToPlaylist
RateBook
PlayMusic
SearchCreativeWork
RateBook
RateBook
BookRestaurant
SearchCreativeWork
GetWeather
RateBook
RateBook
AddToPlaylist
PlayMusic
SearchCreativeWork
BookRestaurant
RateBook
AddToPlaylist
SearchCreativeWork
SearchScreeningEvent
RateBook
PlayMusic
BookRestaurant
GetWeather
SearchScreeningEvent
AddToPlaylist
AddToPlaylist
SearchScreeningEvent
SearchCreativeWork
SearchScreeningEvent
RateBook
GetWeather
AddToPlaylist
BookRestaurant
PlayMusic
SearchCreativeWork
PlayMusic
BookRestaurant
BookRestaurant
AddToPlaylist
GetWeather
RateBook
GetWeather
PlayMusic
SearchCreativeWork
PlayMusic
SearchCreativeWork
PlayMusic
PlayMusic
BookRestaurant
BookRestaurant
BookRestaurant
PlayMusic
SearchCreativeWork
SearchScreeningEvent
GetWeather
PlayMusic
BookRestaurant
RateBook
RateBook
PlayMusic
GetWeather
PlayMusic
BookRestaurant
BookRestaurant
PlayMusic
AddToPlaylist
SearchScreeningEvent
SearchCreativeWork
SearchCreativeWork
BookRestaurant
SearchCreativeWork
PlayMusic
RateBook
GetWeather
BookRestaurant
SearchCreativeWork
PlayMusic
GetWeather
SearchScreeningEvent
SearchCreativeWork
PlayMusic
SearchScreeningEvent
PlayMusic
AddToPlaylist
SearchScreeningEvent
AddToPlaylist
GetWeather
PlayMusic
SearchCreativeWork
GetWeather
SearchScreeningEvent
RateBook
SearchScreeningEvent
RateBook
SearchCreativeWork
AddToPlaylist
BookRestaurant
BookRestaurant
SearchCreativeWork
PlayMusic
SearchScreeningEvent
SearchCreativeWork
AddToPlaylist
SearchScreeningEvent
BookRestaurant
SearchScreeningEvent
RateBook
PlayMusic
PlayMusic
AddToPlaylist
RateBook
BookRestaurant
RateBook
SearchScreeningEvent
PlayMusic
SearchCreativeWork
BookRestaurant
RateBook
GetWeather
RateBook
GetWeather
SearchScreeningEvent
SearchCreativeWork
GetWeather
SearchCreativeWork
SearchScreeningEvent
RateBook
AddToPlaylist
GetWeather
SearchScreeningEvent
SearchScreeningEvent
GetWeather
SearchCreativeWork
RateBook
GetWeather
RateBook
SearchScreeningEvent
BookRestaurant
PlayMusic
AddToPlaylist
AddToPlaylist
PlayMusic
RateBook
BookRestaurant
RateBook
RateBook
RateBook
GetWeather
SearchCreativeWork
AddToPlaylist
SearchScreeningEvent
BookRestaurant
RateBook
BookRestaurant
GetWeather
AddToPlaylist
SearchScreeningEvent
GetWeather
AddToPlaylist
AddToPlaylist
RateBook
PlayMusic
BookRestaurant
SearchCreativeWork
BookRestaurant
RateBook
SearchCreativeWork
BookRestaurant
SearchCreativeWork
PlayMusic
GetWeather
PlayMusic
PlayMusic
BookRestaurant
PlayMusic
GetWeather
PlayMusic
AddToPlaylist
AddToPlaylist
AddToPlaylist
RateBook
SearchScreeningEvent
PlayMusic
GetWeather
SearchScreeningEvent
AddToPlaylist
SearchScreeningEvent
SearchCreativeWork
SearchCreativeWork
PlayMusic
AddToPlaylist
SearchCreativeWork
GetWeather
BookRestaurant
PlayMusic
SearchScreeningEvent
SearchCreativeWork
BookRestaurant
PlayMusic
PlayMusic
PlayMusic
BookRestaurant
BookRestaurant
BookRestaurant
BookRestaurant
PlayMusic
PlayMusic
SearchScreeningEvent
BookRestaurant
SearchScreeningEvent
PlayMusic
PlayMusic
BookRestaurant
PlayMusic
PlayMusic
SearchCreativeWork
BookRestaurant
GetWeather
RateBook
RateBook
SearchScreeningEvent
SearchCreativeWork
SearchScreeningEvent
SearchScreeningEvent
GetWeather
RateBook
SearchCreativeWork
GetWeather
BookRestaurant
BookRestaurant
GetWeather
BookRestaurant
RateBook
RateBook
PlayMusic
BookRestaurant
AddToPlaylist
PlayMusic
SearchCreativeWork
GetWeather
BookRestaurant
SearchCreativeWork
BookRestaurant
GetWeather
PlayMusic
SearchScreeningEvent
GetWeather
BookRestaurant
GetWeather
SearchScreeningEvent
GetWeather
AddToPlaylist
GetWeather
PlayMusic
GetWeather
SearchScreeningEvent
PlayMusic
SearchScreeningEvent
BookRestaurant
RateBook
BookRestaurant
BookRestaurant
AddToPlaylist
RateBook
GetWeather
RateBook
RateBook
PlayMusic
PlayMusic
PlayMusic
SearchCreativeWork
AddToPlaylist
RateBook
SearchScreeningEvent
RateBook
PlayMusic
BookRestaurant
AddToPlaylist
GetWeather
SearchCreativeWork
SearchCreativeWork
GetWeather
SearchScreeningEvent
SearchScreeningEvent
PlayMusic
PlayMusic
AddToPlaylist
PlayMusic
BookRestaurant
RateBook
RateBook
PlayMusic
RateBook
SearchScreeningEvent
BookRestaurant
GetWeather
GetWeather
BookRestaurant
AddToPlaylist
BookRestaurant
RateBook
SearchScreeningEvent
GetWeather
SearchCreativeWork
PlayMusic
AddToPlaylist
SearchCreativeWork
GetWeather
SearchScreeningEvent
SearchCreativeWork
BookRestaurant
RateBook
SearchScreeningEvent
BookRestaurant
PlayMusic
SearchCreativeWork
SearchScreeningEvent
GetWeather
AddToPlaylist
AddToPlaylist
SearchScreeningEvent
GetWeather
BookRestaurant
BookRestaurant
BookRestaurant
AddToPlaylist
AddToPlaylist
SearchScreeningEvent
RateBook
GetWeather
SearchCreativeWork
RateBook
SearchCreativeWork
GetWeather
PlayMusic
AddToPlaylist
AddToPlaylist
GetWeather
BookRestaurant
SearchScreeningEvent
AddToPlaylist
SearchCreativeWork
BookRestaurant
SearchCreativeWork
GetWeather
BookRestaurant
SearchScreeningEvent
RateBook
RateBook
PlayMusic
AddToPlaylist
BookRestaurant
RateBook
BookRestaurant
SearchCreativeWork
BookRestaurant
RateBook
SearchScreeningEvent
AddToPlaylist
SearchScreeningEvent
SearchCreativeWork
RateBook
BookRestaurant
SearchCreativeWork
PlayMusic
AddToPlaylist
BookRestaurant
RateBook
SearchScreeningEvent
BookRestaurant
GetWeather
RateBook
SearchScreeningEvent
AddToPlaylist
SearchScreeningEvent
AddToPlaylist
RateBook
SearchScreeningEvent
BookRestaurant
PlayMusic
PlayMusic
RateBook
SearchCreativeWork
RateBook
BookRestaurant
AddToPlaylist
SearchCreativeWork
BookRestaurant
GetWeather
BookRestaurant
SearchCreativeWork
PlayMusic
PlayMusic
AddToPlaylist
RateBook
GetWeather
AddToPlaylist
BookRestaurant
RateBook
PlayMusic
PlayMusic
AddToPlaylist
AddToPlaylist
SearchCreativeWork
RateBook
PlayMusic
BookRestaurant
RateBook
SearchScreeningEvent
BookRestaurant
AddToPlaylist
SearchScreeningEvent
BookRestaurant
PlayMusic
RateBook
AddToPlaylist
SearchScreeningEvent
BookRestaurant
SearchScreeningEvent
PlayMusic
BookRestaurant
GetWeather
BookRestaurant
SearchScreeningEvent
SearchScreeningEvent
PlayMusic
RateBook
SearchCreativeWork
BookRestaurant
AddToPlaylist
BookRestaurant
SearchCreativeWork
BookRestaurant
GetWeather
BookRestaurant
PlayMusic
RateBook
SearchCreativeWork
SearchScreeningEvent
AddToPlaylist
PlayMusic
SearchScreeningEvent
SearchScreeningEvent
RateBook
RateBook
SearchScreeningEvent
PlayMusic
SearchCreativeWork
SearchCreativeWork
RateBook
GetWeather
RateBook
RateBook
AddToPlaylist
BookRestaurant
SearchCreativeWork
BookRestaurant
PlayMusic
AddToPlaylist
BookRestaurant
AddToPlaylist
SearchCreativeWork
AddToPlaylist
GetWeather
BookRestaurant
GetWeather
RateBook
AddToPlaylist
PlayMusic
BookRestaurant
AddToPlaylist
PlayMusic
SearchCreativeWork
PlayMusic
AddToPlaylist
PlayMusic
SearchScreeningEvent
AddToPlaylist
RateBook
RateBook
AddToPlaylist
PlayMusic
PlayMusic
SearchScreeningEvent
PlayMusic
GetWeather
AddToPlaylist
GetWeather
PlayMusic
GetWeather
BookRestaurant
PlayMusic
SearchCreativeWork
SearchScreeningEvent
BookRestaurant
BookRestaurant
RateBook
RateBook
PlayMusic
SearchScreeningEvent
BookRestaurant
GetWeather
AddToPlaylist
AddToPlaylist
AddToPlaylist
AddToPlaylist
BookRestaurant
GetWeather
GetWeather
SearchScreeningEvent
PlayMusic
BookRestaurant
RateBook
BookRestaurant
BookRestaurant
GetWeather
BookRestaurant
SearchScreeningEvent
PlayMusic
BookRestaurant
BookRestaurant
SearchScreeningEvent
BookRestaurant
BookRestaurant
AddToPlaylist
AddToPlaylist
RateBook
RateBook
BookRestaurant
RateBook
RateBook
SearchCreativeWork
BookRestaurant
GetWeather
SearchScreeningEvent
AddToPlaylist
SearchCreativeWork
PlayMusic
SearchCreativeWork
BookRestaurant
RateBook
RateBook
SearchCreativeWork
AddToPlaylist
SearchScreeningEvent
GetWeather
SearchScreeningEvent
PlayMusic
SearchScreeningEvent
PlayMusic
RateBook
SearchCreativeWork
AddToPlaylist
GetWeather
RateBook
GetWeather
PlayMusic
PlayMusic
SearchCreativeWork
BookRestaurant
BookRestaurant
BookRestaurant
PlayMusic
GetWeather
GetWeather
PlayMusic
GetWeather
PlayMusic
RateBook
AddToPlaylist
SearchCreativeWork
AddToPlaylist
BookRestaurant
PlayMusic
PlayMusic
PlayMusic
SearchCreativeWork
BookRestaurant
SearchScreeningEvent
SearchCreativeWork
BookRestaurant
SearchScreeningEvent
PlayMusic
AddToPlaylist
RateBook
RateBook
GetWeather
RateBook
PlayMusic
BookRestaurant
PlayMusic
AddToPlaylist
GetWeather
GetWeather
RateBook
PlayMusic
SearchScreeningEvent
AddToPlaylist
AddToPlaylist
RateBook
AddToPlaylist
SearchCreativeWork
BookRestaurant
RateBook
PlayMusic
RateBook
BookRestaurant
GetWeather
BookRestaurant
BookRestaurant
AddToPlaylist
PlayMusic
AddToPlaylist
PlayMusic
SearchScreeningEvent
SearchScreeningEvent
BookRestaurant
AddToPlaylist
RateBook
GetWeather
GetWeather
GetWeather
AddToPlaylist
RateBook
PlayMusic
RateBook
RateBook
SearchCreativeWork
AddToPlaylist
GetWeather
AddToPlaylist
RateBook
SearchScreeningEvent
SearchCreativeWork
RateBook
GetWeather
AddToPlaylist
SearchScreeningEvent
RateBook
AddToPlaylist
GetWeather
GetWeather
SearchCreativeWork
RateBook
SearchCreativeWork
GetWeather
BookRestaurant
SearchCreativeWork
AddToPlaylist
SearchScreeningEvent
GetWeather
SearchCreativeWork
BookRestaurant
AddToPlaylist
SearchCreativeWork
SearchScreeningEvent
SearchScreeningEvent
RateBook
SearchCreativeWork
SearchScreeningEvent
GetWeather
PlayMusic
PlayMusic
PlayMusic
GetWeather
BookRestaurant
SearchCreativeWork
BookRestaurant
SearchCreativeWork
AddToPlaylist
GetWeather
RateBook
SearchCreativeWork
BookRestaurant
SearchCreativeWork
SearchScreeningEvent
PlayMusic
RateBook
RateBook
AddToPlaylist
GetWeather
SearchCreativeWork
AddToPlaylist
RateBook
RateBook
GetWeather
RateBook
AddToPlaylist
SearchScreeningEvent
PlayMusic
SearchScreeningEvent
RateBook
PlayMusic
PlayMusic
BookRestaurant
BookRestaurant
RateBook
GetWeather
SearchScreeningEvent
BookRestaurant
RateBook
SearchCreativeWork
BookRestaurant
AddToPlaylist
AddToPlaylist
SearchCreativeWork
GetWeather
SearchScreeningEvent
PlayMusic
RateBook
AddToPlaylist
SearchCreativeWork
BookRestaurant
AddToPlaylist
BookRestaurant
PlayMusic
SearchCreativeWork
AddToPlaylist
SearchScreeningEvent
GetWeather
SearchScreeningEvent
SearchScreeningEvent
PlayMusic
SearchCreativeWork
AddToPlaylist
BookRestaurant
SearchCreativeWork
SearchCreativeWork
RateBook
RateBook
BookRestaurant
SearchCreativeWork
RateBook
BookRestaurant
GetWeather
BookRestaurant
SearchCreativeWork
AddToPlaylist
RateBook
GetWeather
SearchScreeningEvent
AddToPlaylist
BookRestaurant
SearchScreeningEvent
AddToPlaylist
BookRestaurant
GetWeather
AddToPlaylist
BookRestaurant
RateBook
AddToPlaylist
PlayMusic
BookRestaurant
RateBook
BookRestaurant
AddToPlaylist
SearchCreativeWork
RateBook
SearchCreativeWork
AddToPlaylist
BookRestaurant
SearchCreativeWork
SearchCreativeWork
SearchCreativeWork
AddToPlaylist
SearchScreeningEvent
BookRestaurant
SearchCreativeWork
SearchScreeningEvent
GetWeather
BookRestaurant
SearchScreeningEvent
GetWeather
RateBook
GetWeather
SearchScreeningEvent
RateBook
SearchScreeningEvent
GetWeather
GetWeather
SearchScreeningEvent
GetWeather
SearchCreativeWork
PlayMusic
BookRestaurant
SearchCreativeWork
BookRestaurant
PlayMusic
RateBook
GetWeather
SearchScreeningEvent
PlayMusic
SearchScreeningEvent
BookRestaurant
GetWeather
SearchScreeningEvent
AddToPlaylist
PlayMusic
AddToPlaylist
SearchScreeningEvent
SearchCreativeWork
RateBook
BookRestaurant
AddToPlaylist
BookRestaurant
BookRestaurant
RateBook
PlayMusic
SearchCreativeWork
SearchScreeningEvent
SearchCreativeWork
PlayMusic
BookRestaurant
BookRestaurant
PlayMusic
SearchScreeningEvent
AddToPlaylist
AddToPlaylist
PlayMusic
SearchScreeningEvent
SearchScreeningEvent
PlayMusic
PlayMusic
SearchScreeningEvent
BookRestaurant
SearchScreeningEvent
BookRestaurant
RateBook
RateBook
AddToPlaylist
BookRestaurant
GetWeather
GetWeather
PlayMusic
SearchScreeningEvent
RateBook
SearchCreativeWork
AddToPlaylist
AddToPlaylist
PlayMusic
BookRestaurant
AddToPlaylist
PlayMusic
RateBook
SearchCreativeWork
RateBook
AddToPlaylist
BookRestaurant
SearchScreeningEvent
BookRestaurant
SearchCreativeWork
SearchCreativeWork
PlayMusic
SearchCreativeWork
PlayMusic
RateBook
GetWeather
AddToPlaylist
BookRestaurant
PlayMusic
PlayMusic
BookRestaurant
SearchScreeningEvent
GetWeather
SearchCreativeWork
BookRestaurant
SearchCreativeWork
PlayMusic
BookRestaurant
SearchScreeningEvent
PlayMusic
RateBook
PlayMusic
SearchCreativeWork
BookRestaurant
GetWeather
RateBook
RateBook
AddToPlaylist
BookRestaurant
AddToPlaylist
SearchScreeningEvent
PlayMusic
SearchScreeningEvent
SearchScreeningEvent
SearchScreeningEvent
AddToPlaylist
RateBook
SearchCreativeWork
RateBook
SearchScreeningEvent
SearchCreativeWork
GetWeather
AddToPlaylist
BookRestaurant
PlayMusic
PlayMusic
RateBook
PlayMusic
SearchCreativeWork
RateBook
RateBook
GetWeather
PlayMusic
SearchScreeningEvent
PlayMusic
GetWeather
PlayMusic
BookRestaurant
BookRestaurant
PlayMusic
AddToPlaylist
GetWeather
BookRestaurant
PlayMusic
BookRestaurant
BookRestaurant
GetWeather
RateBook
RateBook
PlayMusic
RateBook
GetWeather
BookRestaurant
BookRestaurant
AddToPlaylist
RateBook
SearchCreativeWork
SearchScreeningEvent
BookRestaurant
SearchScreeningEvent
SearchScreeningEvent
SearchScreeningEvent
RateBook
RateBook
GetWeather
AddToPlaylist
GetWeather
SearchScreeningEvent
GetWeather
GetWeather
BookRestaurant
BookRestaurant
PlayMusic
SearchCreativeWork
RateBook
SearchCreativeWork
RateBook
RateBook
GetWeather
GetWeather
SearchCreativeWork
SearchCreativeWork
AddToPlaylist
GetWeather
GetWeather
RateBook
RateBook
BookRestaurant
SearchScreeningEvent
BookRestaurant
BookRestaurant
AddToPlaylist
BookRestaurant
GetWeather
PlayMusic
GetWeather
SearchCreativeWork
AddToPlaylist
RateBook
SearchCreativeWork
BookRestaurant
RateBook
BookRestaurant
SearchScreeningEvent
PlayMusic
RateBook
BookRestaurant
BookRestaurant
PlayMusic
RateBook
BookRestaurant
PlayMusic
PlayMusic
BookRestaurant
PlayMusic
AddToPlaylist
BookRestaurant
SearchScreeningEvent
SearchCreativeWork
GetWeather
RateBook
SearchScreeningEvent
SearchCreativeWork
BookRestaurant
GetWeather
SearchScreeningEvent
BookRestaurant
SearchCreativeWork
PlayMusic
RateBook
PlayMusic
SearchScreeningEvent
BookRestaurant
BookRestaurant
AddToPlaylist
BookRestaurant
SearchCreativeWork
BookRestaurant
AddToPlaylist
BookRestaurant
PlayMusic
SearchCreativeWork
RateBook
PlayMusic
PlayMusic
PlayMusic
AddToPlaylist
GetWeather
GetWeather
PlayMusic
PlayMusic
SearchCreativeWork
AddToPlaylist
RateBook
RateBook
GetWeather
BookRestaurant
SearchCreativeWork
RateBook
PlayMusic
SearchScreeningEvent
SearchCreativeWork
AddToPlaylist
AddToPlaylist
SearchScreeningEvent
SearchCreativeWork
GetWeather
AddToPlaylist
GetWeather
AddToPlaylist
SearchScreeningEvent
SearchCreativeWork
SearchCreativeWork
BookRestaurant
GetWeather
SearchCreativeWork
RateBook
SearchCreativeWork
PlayMusic
SearchScreeningEvent
GetWeather
SearchScreeningEvent
AddToPlaylist
BookRestaurant
SearchScreeningEvent
SearchCreativeWork
SearchCreativeWork
SearchCreativeWork
AddToPlaylist
SearchScreeningEvent
GetWeather
SearchScreeningEvent
AddToPlaylist
SearchScreeningEvent
RateBook
BookRestaurant
PlayMusic
RateBook
AddToPlaylist
SearchCreativeWork
AddToPlaylist
SearchScreeningEvent
AddToPlaylist
RateBook
SearchCreativeWork
AddToPlaylist
SearchCreativeWork
GetWeather
AddToPlaylist
AddToPlaylist
SearchScreeningEvent
SearchCreativeWork
SearchCreativeWork
RateBook
SearchScreeningEvent
GetWeather
RateBook
BookRestaurant
GetWeather
GetWeather
AddToPlaylist
PlayMusic
SearchCreativeWork
SearchCreativeWork
SearchScreeningEvent
RateBook
BookRestaurant
GetWeather
GetWeather
PlayMusic
BookRestaurant
SearchCreativeWork
SearchCreativeWork
AddToPlaylist
GetWeather
AddToPlaylist
AddToPlaylist
RateBook
BookRestaurant
SearchCreativeWork
RateBook
RateBook
AddToPlaylist
BookRestaurant
AddToPlaylist
BookRestaurant
SearchScreeningEvent
PlayMusic
AddToPlaylist
GetWeather
BookRestaurant
PlayMusic
RateBook
GetWeather
GetWeather
SearchScreeningEvent
GetWeather
SearchCreativeWork
PlayMusic
BookRestaurant
PlayMusic
BookRestaurant
PlayMusic
SearchCreativeWork
SearchScreeningEvent
SearchCreativeWork
RateBook
SearchScreeningEvent
SearchScreeningEvent
PlayMusic
PlayMusic
SearchScreeningEvent
GetWeather
GetWeather
SearchScreeningEvent
AddToPlaylist
SearchScreeningEvent
RateBook
GetWeather
SearchScreeningEvent
BookRestaurant
GetWeather
RateBook
SearchCreativeWork
BookRestaurant
SearchScreeningEvent
SearchCreativeWork
PlayMusic
AddToPlaylist
RateBook
PlayMusic
GetWeather
GetWeather
SearchScreeningEvent
SearchScreeningEvent
BookRestaurant
BookRestaurant
AddToPlaylist
BookRestaurant
GetWeather
GetWeather
PlayMusic
PlayMusic
SearchScreeningEvent
PlayMusic
RateBook
RateBook
RateBook
SearchCreativeWork
PlayMusic
SearchScreeningEvent
PlayMusic
SearchScreeningEvent
GetWeather
RateBook
AddToPlaylist
RateBook
BookRestaurant
GetWeather
BookRestaurant
SearchCreativeWork
AddToPlaylist
SearchScreeningEvent
SearchScreeningEvent
BookRestaurant
RateBook
SearchCreativeWork
PlayMusic
SearchCreativeWork
GetWeather
BookRestaurant
SearchScreeningEvent
SearchCreativeWork
AddToPlaylist
BookRestaurant
PlayMusic
GetWeather
SearchScreeningEvent
BookRestaurant
GetWeather
SearchScreeningEvent
PlayMusic
PlayMusic
GetWeather
GetWeather
RateBook
PlayMusic
SearchScreeningEvent
SearchCreativeWork
AddToPlaylist
SearchCreativeWork
PlayMusic
GetWeather
GetWeather
SearchCreativeWork
SearchScreeningEvent
GetWeather
SearchScreeningEvent
PlayMusic
BookRestaurant
SearchCreativeWork
GetWeather
AddToPlaylist
SearchCreativeWork
AddToPlaylist
SearchScreeningEvent
RateBook
SearchCreativeWork
GetWeather
GetWeather
BookRestaurant
SearchCreativeWork
PlayMusic
SearchScreeningEvent
PlayMusic
GetWeather
PlayMusic
GetWeather
SearchCreativeWork
GetWeather
AddToPlaylist
SearchScreeningEvent
AddToPlaylist
PlayMusic
SearchCreativeWork
RateBook
GetWeather
AddToPlaylist
RateBook
GetWeather
RateBook
BookRestaurant
RateBook
GetWeather
BookRestaurant
PlayMusic
BookRestaurant
PlayMusic
GetWeather
BookRestaurant
BookRestaurant
BookRestaurant
AddToPlaylist
BookRestaurant
AddToPlaylist
BookRestaurant
RateBook
SearchScreeningEvent
GetWeather
SearchScreeningEvent
GetWeather
SearchScreeningEvent
BookRestaurant
SearchScreeningEvent
GetWeather
SearchCreativeWork
BookRestaurant
SearchCreativeWork
PlayMusic
SearchCreativeWork
SearchScreeningEvent
GetWeather
PlayMusic
SearchScreeningEvent
BookRestaurant
SearchScreeningEvent
PlayMusic
SearchScreeningEvent
AddToPlaylist
SearchScreeningEvent
AddToPlaylist
SearchCreativeWork
PlayMusic
PlayMusic
SearchCreativeWork
BookRestaurant
BookRestaurant
GetWeather
BookRestaurant
GetWeather
RateBook
SearchScreeningEvent
RateBook
AddToPlaylist
GetWeather
PlayMusic
PlayMusic
AddToPlaylist
AddToPlaylist
BookRestaurant
GetWeather
BookRestaurant
AddToPlaylist
RateBook
GetWeather
RateBook
SearchCreativeWork
RateBook
PlayMusic
BookRestaurant
AddToPlaylist
RateBook
BookRestaurant
PlayMusic
BookRestaurant
SearchScreeningEvent
PlayMusic
PlayMusic
GetWeather
GetWeather
PlayMusic
BookRestaurant
AddToPlaylist
RateBook
BookRestaurant
RateBook
PlayMusic
RateBook
SearchCreativeWork
RateBook
RateBook
SearchCreativeWork
AddToPlaylist
RateBook
SearchCreativeWork
SearchScreeningEvent
PlayMusic
PlayMusic
AddToPlaylist
SearchScreeningEvent
SearchScreeningEvent
RateBook
PlayMusic
PlayMusic
BookRestaurant
SearchScreeningEvent
GetWeather
SearchScreeningEvent
RateBook
SearchScreeningEvent
BookRestaurant
AddToPlaylist
SearchCreativeWork
PlayMusic
PlayMusic
GetWeather
GetWeather
SearchCreativeWork
PlayMusic
PlayMusic
RateBook
AddToPlaylist
AddToPlaylist
PlayMusic
BookRestaurant
SearchCreativeWork
SearchCreativeWork
SearchCreativeWork
BookRestaurant
AddToPlaylist
GetWeather
BookRestaurant
SearchCreativeWork
SearchScreeningEvent
AddToPlaylist
BookRestaurant
SearchCreativeWork
RateBook
SearchCreativeWork
SearchScreeningEvent
SearchScreeningEvent
GetWeather
RateBook
SearchScreeningEvent
SearchCreativeWork
BookRestaurant
SearchScreeningEvent
SearchCreativeWork
SearchCreativeWork
AddToPlaylist
SearchScreeningEvent
SearchCreativeWork
BookRestaurant
AddToPlaylist
SearchCreativeWork
AddToPlaylist
BookRestaurant
SearchScreeningEvent
RateBook
RateBook
PlayMusic
AddToPlaylist
PlayMusic
GetWeather
RateBook
RateBook
RateBook
PlayMusic
SearchCreativeWork
AddToPlaylist
PlayMusic
PlayMusic
BookRestaurant
RateBook
RateBook
PlayMusic
SearchCreativeWork
SearchCreativeWork
AddToPlaylist
PlayMusic
BookRestaurant
SearchCreativeWork
PlayMusic
SearchScreeningEvent
PlayMusic
BookRestaurant
RateBook
GetWeather
SearchCreativeWork
SearchScreeningEvent
SearchCreativeWork
RateBook
GetWeather
RateBook
SearchCreativeWork
BookRestaurant
RateBook
GetWeather
SearchCreativeWork
AddToPlaylist
AddToPlaylist
AddToPlaylist
RateBook
RateBook
SearchCreativeWork
AddToPlaylist
BookRestaurant
PlayMusic
GetWeather
PlayMusic
SearchCreativeWork
GetWeather
GetWeather
BookRestaurant
SearchScreeningEvent
SearchScreeningEvent
RateBook
GetWeather
AddToPlaylist
SearchCreativeWork
RateBook
SearchCreativeWork
AddToPlaylist
PlayMusic
SearchCreativeWork
GetWeather
SearchCreativeWork
AddToPlaylist
BookRestaurant
SearchCreativeWork
PlayMusic
RateBook
AddToPlaylist
BookRestaurant
SearchCreativeWork
PlayMusic
BookRestaurant
AddToPlaylist
PlayMusic
RateBook
BookRestaurant
BookRestaurant
SearchCreativeWork
GetWeather
BookRestaurant
SearchScreeningEvent
AddToPlaylist
AddToPlaylist
SearchScreeningEvent
PlayMusic
SearchCreativeWork
SearchCreativeWork
SearchCreativeWork
SearchCreativeWork
AddToPlaylist
AddToPlaylist
SearchScreeningEvent
BookRestaurant
PlayMusic
SearchCreativeWork
SearchScreeningEvent
BookRestaurant
RateBook
PlayMusic
SearchCreativeWork
BookRestaurant
SearchCreativeWork
PlayMusic
SearchScreeningEvent
RateBook
RateBook
SearchScreeningEvent
PlayMusic
SearchScreeningEvent
AddToPlaylist
BookRestaurant
PlayMusic
RateBook
SearchCreativeWork
GetWeather
RateBook
PlayMusic
SearchScreeningEvent
SearchCreativeWork
AddToPlaylist
RateBook
BookRestaurant
SearchScreeningEvent
AddToPlaylist
PlayMusic
SearchCreativeWork
PlayMusic
GetWeather
AddToPlaylist
SearchScreeningEvent
BookRestaurant
PlayMusic
BookRestaurant
GetWeather
BookRestaurant
RateBook
BookRestaurant
SearchCreativeWork
GetWeather
PlayMusic
SearchScreeningEvent
AddToPlaylist
PlayMusic
RateBook
SearchCreativeWork
RateBook
AddToPlaylist
AddToPlaylist
SearchScreeningEvent
PlayMusic
BookRestaurant
RateBook
PlayMusic
AddToPlaylist
SearchCreativeWork
RateBook
SearchCreativeWork
GetWeather
SearchCreativeWork
PlayMusic
AddToPlaylist
GetWeather
AddToPlaylist
AddToPlaylist
GetWeather
SearchScreeningEvent
BookRestaurant
PlayMusic
SearchScreeningEvent
GetWeather
SearchScreeningEvent
AddToPlaylist
GetWeather
SearchScreeningEvent
SearchCreativeWork
GetWeather
AddToPlaylist
BookRestaurant
SearchScreeningEvent
RateBook
GetWeather
SearchCreativeWork
BookRestaurant
SearchScreeningEvent
AddToPlaylist
SearchCreativeWork
SearchScreeningEvent
RateBook
SearchCreativeWork
RateBook
GetWeather
SearchScreeningEvent
SearchCreativeWork
BookRestaurant
GetWeather
SearchCreativeWork
SearchScreeningEvent
BookRestaurant
SearchCreativeWork
BookRestaurant
BookRestaurant
SearchScreeningEvent
SearchCreativeWork
GetWeather
PlayMusic
SearchCreativeWork
PlayMusic
RateBook
BookRestaurant
PlayMusic
SearchScreeningEvent
BookRestaurant
BookRestaurant
SearchScreeningEvent
SearchCreativeWork
PlayMusic
GetWeather
PlayMusic
GetWeather
GetWeather
RateBook
SearchScreeningEvent
SearchCreativeWork
SearchScreeningEvent
SearchScreeningEvent
AddToPlaylist
PlayMusic
BookRestaurant
GetWeather
PlayMusic
GetWeather
SearchScreeningEvent
SearchCreativeWork
SearchCreativeWork
SearchScreeningEvent
AddToPlaylist
BookRestaurant
PlayMusic
BookRestaurant
PlayMusic
SearchScreeningEvent
SearchCreativeWork
SearchCreativeWork
SearchCreativeWork
AddToPlaylist
SearchCreativeWork
RateBook
BookRestaurant
SearchScreeningEvent
AddToPlaylist
SearchScreeningEvent
GetWeather
SearchScreeningEvent
GetWeather
GetWeather
PlayMusic
GetWeather
SearchScreeningEvent
SearchScreeningEvent
RateBook
AddToPlaylist
SearchCreativeWork
PlayMusic
SearchCreativeWork
PlayMusic
RateBook
RateBook
GetWeather
AddToPlaylist
SearchScreeningEvent
SearchCreativeWork
GetWeather
PlayMusic
SearchCreativeWork
AddToPlaylist
BookRestaurant
PlayMusic
RateBook
PlayMusic
RateBook
SearchScreeningEvent
RateBook
BookRestaurant
SearchCreativeWork
SearchCreativeWork
PlayMusic
PlayMusic
GetWeather
SearchCreativeWork
SearchCreativeWork
SearchCreativeWork
SearchCreativeWork
GetWeather
SearchCreativeWork
RateBook
SearchScreeningEvent
SearchScreeningEvent
GetWeather
RateBook
RateBook
SearchCreativeWork
PlayMusic
SearchScreeningEvent
SearchScreeningEvent
PlayMusic
RateBook
AddToPlaylist
GetWeather
BookRestaurant
SearchCreativeWork
BookRestaurant
SearchCreativeWork
GetWeather
SearchCreativeWork
AddToPlaylist
GetWeather
AddToPlaylist
AddToPlaylist
AddToPlaylist
PlayMusic
SearchScreeningEvent
AddToPlaylist
SearchCreativeWork
SearchCreativeWork
BookRestaurant
SearchScreeningEvent
SearchScreeningEvent
GetWeather
AddToPlaylist
GetWeather
RateBook
SearchCreativeWork
GetWeather
SearchScreeningEvent
BookRestaurant
RateBook
GetWeather
PlayMusic
GetWeather
PlayMusic
AddToPlaylist
BookRestaurant
BookRestaurant
PlayMusic
SearchScreeningEvent
BookRestaurant
GetWeather
GetWeather
RateBook
BookRestaurant
SearchCreativeWork
BookRestaurant
SearchScreeningEvent
GetWeather
SearchCreativeWork
GetWeather
BookRestaurant
SearchScreeningEvent
GetWeather
RateBook
AddToPlaylist
PlayMusic
BookRestaurant
AddToPlaylist
RateBook
RateBook
GetWeather
SearchScreeningEvent
BookRestaurant
AddToPlaylist
AddToPlaylist
BookRestaurant
BookRestaurant
GetWeather
GetWeather
SearchScreeningEvent
PlayMusic
SearchScreeningEvent
SearchCreativeWork
RateBook
BookRestaurant
BookRestaurant
AddToPlaylist
AddToPlaylist
RateBook
PlayMusic
SearchScreeningEvent
RateBook
RateBook
GetWeather
RateBook
SearchCreativeWork
GetWeather
SearchScreeningEvent
PlayMusic
BookRestaurant
GetWeather
SearchScreeningEvent
GetWeather
SearchCreativeWork
SearchScreeningEvent
SearchScreeningEvent
RateBook
RateBook
PlayMusic
SearchScreeningEvent
BookRestaurant
AddToPlaylist
SearchScreeningEvent
PlayMusic
SearchScreeningEvent
AddToPlaylist
SearchScreeningEvent
AddToPlaylist
RateBook
SearchScreeningEvent
SearchCreativeWork
GetWeather
BookRestaurant
PlayMusic
SearchScreeningEvent
PlayMusic
AddToPlaylist
SearchScreeningEvent
BookRestaurant
RateBook
BookRestaurant
SearchScreeningEvent
PlayMusic
RateBook
BookRestaurant
SearchCreativeWork
SearchCreativeWork
PlayMusic
SearchCreativeWork
GetWeather
BookRestaurant
BookRestaurant
GetWeather
AddToPlaylist
GetWeather
BookRestaurant
PlayMusic
AddToPlaylist
GetWeather
RateBook
AddToPlaylist
RateBook
RateBook
BookRestaurant
SearchCreativeWork
BookRestaurant
GetWeather
SearchScreeningEvent
AddToPlaylist
AddToPlaylist
PlayMusic
SearchScreeningEvent
SearchCreativeWork
SearchCreativeWork
BookRestaurant
BookRestaurant
RateBook
RateBook
BookRestaurant
BookRestaurant
BookRestaurant
RateBook
SearchScreeningEvent
AddToPlaylist
GetWeather
SearchScreeningEvent
GetWeather
PlayMusic
RateBook
SearchScreeningEvent
SearchCreativeWork
SearchScreeningEvent
PlayMusic
RateBook
SearchScreeningEvent
GetWeather
GetWeather
AddToPlaylist
GetWeather
AddToPlaylist
RateBook
PlayMusic
PlayMusic
GetWeather
AddToPlaylist
SearchCreativeWork
RateBook
AddToPlaylist
AddToPlaylist
GetWeather
SearchCreativeWork
SearchScreeningEvent
GetWeather
GetWeather
SearchScreeningEvent
RateBook
GetWeather
SearchScreeningEvent
PlayMusic
PlayMusic
SearchScreeningEvent
SearchScreeningEvent
PlayMusic
SearchScreeningEvent
BookRestaurant
RateBook
SearchScreeningEvent
PlayMusic
GetWeather
GetWeather
SearchCreativeWork
AddToPlaylist
PlayMusic
GetWeather
BookRestaurant
GetWeather
PlayMusic
GetWeather
BookRestaurant
AddToPlaylist
RateBook
SearchCreativeWork
BookRestaurant
SearchScreeningEvent
PlayMusic
BookRestaurant
GetWeather
AddToPlaylist
GetWeather
SearchCreativeWork
AddToPlaylist
GetWeather
PlayMusic
RateBook
AddToPlaylist
BookRestaurant
AddToPlaylist
GetWeather
SearchScreeningEvent
AddToPlaylist
PlayMusic
PlayMusic
GetWeather
SearchCreativeWork
AddToPlaylist
AddToPlaylist
GetWeather
PlayMusic
SearchCreativeWork
AddToPlaylist
AddToPlaylist
PlayMusic
PlayMusic
RateBook
RateBook
SearchScreeningEvent
PlayMusic
GetWeather
SearchCreativeWork
SearchCreativeWork
PlayMusic
BookRestaurant
SearchScreeningEvent
SearchCreativeWork
RateBook
AddToPlaylist
BookRestaurant
RateBook
PlayMusic
PlayMusic
RateBook
BookRestaurant
BookRestaurant
GetWeather
SearchScreeningEvent
GetWeather
AddToPlaylist
SearchCreativeWork
RateBook
BookRestaurant
SearchScreeningEvent
SearchCreativeWork
GetWeather
SearchScreeningEvent
AddToPlaylist
SearchScreeningEvent
RateBook
PlayMusic
SearchScreeningEvent
BookRestaurant
AddToPlaylist
SearchScreeningEvent
SearchScreeningEvent
SearchScreeningEvent
PlayMusic
SearchCreativeWork
GetWeather
RateBook
PlayMusic
SearchScreeningEvent
GetWeather
PlayMusic
BookRestaurant
BookRestaurant
PlayMusic
BookRestaurant
RateBook
RateBook
SearchCreativeWork
SearchCreativeWork
PlayMusic
SearchScreeningEvent
RateBook
SearchCreativeWork
GetWeather
AddToPlaylist
PlayMusic
AddToPlaylist
SearchCreativeWork
SearchScreeningEvent
RateBook
SearchScreeningEvent
AddToPlaylist
SearchCreativeWork
SearchCreativeWork
SearchScreeningEvent
BookRestaurant
GetWeather
PlayMusic
BookRestaurant
GetWeather
GetWeather
AddToPlaylist
PlayMusic
SearchScreeningEvent
RateBook
SearchCreativeWork
AddToPlaylist
PlayMusic
BookRestaurant
RateBook
PlayMusic
SearchCreativeWork
GetWeather
SearchCreativeWork
BookRestaurant
RateBook
PlayMusic
SearchCreativeWork
GetWeather
AddToPlaylist
BookRestaurant
AddToPlaylist
SearchScreeningEvent
GetWeather
BookRestaurant
RateBook
SearchCreativeWork
BookRestaurant
GetWeather
PlayMusic
SearchScreeningEvent
RateBook
SearchScreeningEvent
SearchScreeningEvent
RateBook
RateBook
BookRestaurant
SearchScreeningEvent
BookRestaurant
GetWeather
SearchScreeningEvent
SearchScreeningEvent
RateBook
SearchScreeningEvent
AddToPlaylist
BookRestaurant
SearchCreativeWork
SearchCreativeWork
GetWeather
BookRestaurant
SearchScreeningEvent
BookRestaurant
SearchCreativeWork
SearchCreativeWork
GetWeather
SearchCreativeWork
RateBook
RateBook
BookRestaurant
GetWeather
GetWeather
RateBook
PlayMusic
PlayMusic
GetWeather
RateBook
SearchCreativeWork
AddToPlaylist
GetWeather
SearchScreeningEvent
SearchCreativeWork
PlayMusic
RateBook
PlayMusic
GetWeather
GetWeather
GetWeather
BookRestaurant
GetWeather
SearchCreativeWork
GetWeather
SearchCreativeWork
AddToPlaylist
SearchScreeningEvent
SearchScreeningEvent
RateBook
RateBook
GetWeather
SearchCreativeWork
GetWeather
AddToPlaylist
AddToPlaylist
SearchScreeningEvent
BookRestaurant
AddToPlaylist
RateBook
AddToPlaylist
AddToPlaylist
PlayMusic
PlayMusic
SearchCreativeWork
SearchCreativeWork
RateBook
AddToPlaylist
BookRestaurant
PlayMusic
PlayMusic
SearchScreeningEvent
AddToPlaylist
RateBook
RateBook
SearchScreeningEvent
RateBook
AddToPlaylist
SearchScreeningEvent
AddToPlaylist
SearchCreativeWork
PlayMusic
SearchScreeningEvent
PlayMusic
AddToPlaylist
PlayMusic
AddToPlaylist
PlayMusic
BookRestaurant
PlayMusic
AddToPlaylist
SearchScreeningEvent
PlayMusic
GetWeather
PlayMusic
AddToPlaylist
BookRestaurant
GetWeather
SearchScreeningEvent
AddToPlaylist
AddToPlaylist
RateBook
PlayMusic
SearchCreativeWork
RateBook
RateBook
PlayMusic
AddToPlaylist
AddToPlaylist
AddToPlaylist
PlayMusic
PlayMusic
BookRestaurant
SearchScreeningEvent
RateBook
GetWeather
BookRestaurant
PlayMusic
PlayMusic
SearchCreativeWork
BookRestaurant
SearchScreeningEvent
PlayMusic
SearchScreeningEvent
AddToPlaylist
PlayMusic
AddToPlaylist
GetWeather
PlayMusic
BookRestaurant
SearchCreativeWork
BookRestaurant
AddToPlaylist
SearchCreativeWork
BookRestaurant
BookRestaurant
PlayMusic
GetWeather
SearchScreeningEvent
BookRestaurant
PlayMusic
SearchScreeningEvent
GetWeather
RateBook
SearchScreeningEvent
AddToPlaylist
PlayMusic
RateBook
SearchCreativeWork
GetWeather
AddToPlaylist
PlayMusic
RateBook
BookRestaurant
GetWeather
SearchScreeningEvent
SearchCreativeWork
BookRestaurant
SearchScreeningEvent
RateBook
AddToPlaylist
BookRestaurant
PlayMusic
RateBook
RateBook
SearchScreeningEvent
GetWeather
SearchCreativeWork
SearchScreeningEvent
RateBook
GetWeather
AddToPlaylist
SearchScreeningEvent
RateBook
PlayMusic
PlayMusic
SearchCreativeWork
SearchScreeningEvent
SearchCreativeWork
SearchScreeningEvent
GetWeather
PlayMusic
RateBook
SearchCreativeWork
SearchScreeningEvent
SearchScreeningEvent
AddToPlaylist
SearchCreativeWork
RateBook
BookRestaurant
AddToPlaylist
SearchCreativeWork
BookRestaurant
RateBook
AddToPlaylist
PlayMusic
BookRestaurant
AddToPlaylist
BookRestaurant
RateBook
BookRestaurant
GetWeather
RateBook
AddToPlaylist
AddToPlaylist
GetWeather
GetWeather
RateBook
AddToPlaylist
AddToPlaylist
AddToPlaylist
SearchCreativeWork
GetWeather
RateBook
SearchCreativeWork
AddToPlaylist
GetWeather
BookRestaurant
SearchScreeningEvent
SearchCreativeWork
BookRestaurant
AddToPlaylist
GetWeather
SearchCreativeWork
SearchCreativeWork
GetWeather
SearchCreativeWork
AddToPlaylist
RateBook
RateBook
RateBook
GetWeather
SearchScreeningEvent
GetWeather
PlayMusic
RateBook
PlayMusic
SearchCreativeWork
SearchScreeningEvent
GetWeather
RateBook
RateBook
SearchCreativeWork
PlayMusic
RateBook
SearchCreativeWork
SearchCreativeWork
SearchCreativeWork
SearchCreativeWork
RateBook
SearchScreeningEvent
PlayMusic
BookRestaurant
AddToPlaylist
AddToPlaylist
SearchScreeningEvent
AddToPlaylist
PlayMusic
SearchScreeningEvent
SearchCreativeWork
SearchScreeningEvent
RateBook
GetWeather
SearchScreeningEvent
AddToPlaylist
SearchCreativeWork
SearchScreeningEvent
PlayMusic
RateBook
GetWeather
GetWeather
SearchScreeningEvent
RateBook
BookRestaurant
AddToPlaylist
GetWeather
AddToPlaylist
SearchCreativeWork
BookRestaurant
GetWeather
SearchScreeningEvent
SearchScreeningEvent
AddToPlaylist
GetWeather
GetWeather
BookRestaurant
AddToPlaylist
PlayMusic
RateBook
SearchCreativeWork
GetWeather
RateBook
SearchCreativeWork
RateBook
GetWeather
AddToPlaylist
SearchCreativeWork
AddToPlaylist
PlayMusic
PlayMusic
RateBook
PlayMusic
PlayMusic
GetWeather
SearchCreativeWork
GetWeather
BookRestaurant
GetWeather
RateBook
AddToPlaylist
PlayMusic
BookRestaurant
PlayMusic
RateBook
BookRestaurant
PlayMusic
GetWeather
BookRestaurant
SearchCreativeWork
PlayMusic
PlayMusic
PlayMusic
AddToPlaylist
GetWeather
AddToPlaylist
SearchScreeningEvent
AddToPlaylist
AddToPlaylist
SearchScreeningEvent
PlayMusic
BookRestaurant
SearchCreativeWork
SearchCreativeWork
GetWeather
BookRestaurant
BookRestaurant
SearchScreeningEvent
SearchCreativeWork
BookRestaurant
SearchScreeningEvent
SearchScreeningEvent
BookRestaurant
AddToPlaylist
BookRestaurant
SearchScreeningEvent
AddToPlaylist
SearchCreativeWork
SearchCreativeWork
BookRestaurant
AddToPlaylist
RateBook
PlayMusic
BookRestaurant
GetWeather
SearchCreativeWork
BookRestaurant
PlayMusic
GetWeather
RateBook
GetWeather
PlayMusic
RateBook
PlayMusic
GetWeather
SearchCreativeWork
SearchCreativeWork
SearchScreeningEvent
GetWeather
SearchCreativeWork
GetWeather
AddToPlaylist
AddToPlaylist
BookRestaurant
RateBook
PlayMusic
BookRestaurant
PlayMusic
GetWeather
BookRestaurant
PlayMusic
SearchScreeningEvent
SearchCreativeWork
PlayMusic
AddToPlaylist
PlayMusic
PlayMusic
SearchCreativeWork
GetWeather
BookRestaurant
SearchScreeningEvent
AddToPlaylist
GetWeather
RateBook
RateBook
SearchCreativeWork
RateBook
SearchCreativeWork
BookRestaurant
PlayMusic
BookRestaurant
SearchScreeningEvent
RateBook
BookRestaurant
GetWeather
PlayMusic
AddToPlaylist
SearchScreeningEvent
GetWeather
RateBook
GetWeather
GetWeather
RateBook
SearchScreeningEvent
GetWeather
SearchCreativeWork
SearchScreeningEvent
SearchScreeningEvent
GetWeather
SearchCreativeWork
AddToPlaylist
BookRestaurant
RateBook
BookRestaurant
AddToPlaylist
SearchCreativeWork
SearchCreativeWork
BookRestaurant
GetWeather
GetWeather
RateBook
RateBook
SearchCreativeWork
SearchCreativeWork
GetWeather
AddToPlaylist
SearchCreativeWork
SearchScreeningEvent
SearchCreativeWork
GetWeather
AddToPlaylist
AddToPlaylist
PlayMusic
GetWeather
GetWeather
SearchCreativeWork
GetWeather
SearchScreeningEvent
RateBook
PlayMusic
SearchScreeningEvent
PlayMusic
RateBook
RateBook
AddToPlaylist
GetWeather
SearchScreeningEvent
SearchCreativeWork
SearchCreativeWork
RateBook
BookRestaurant
AddToPlaylist
GetWeather
GetWeather
RateBook
RateBook
AddToPlaylist
BookRestaurant
GetWeather
BookRestaurant
AddToPlaylist
RateBook
PlayMusic
BookRestaurant
AddToPlaylist
GetWeather
BookRestaurant
AddToPlaylist
GetWeather
PlayMusic
GetWeather
SearchScreeningEvent
RateBook
SearchScreeningEvent
GetWeather
AddToPlaylist
SearchCreativeWork
GetWeather
SearchCreativeWork
BookRestaurant
BookRestaurant
GetWeather
PlayMusic
PlayMusic
BookRestaurant
PlayMusic
GetWeather
GetWeather
SearchScreeningEvent
BookRestaurant
RateBook
PlayMusic
RateBook
AddToPlaylist
RateBook
AddToPlaylist
SearchCreativeWork
SearchCreativeWork
PlayMusic
AddToPlaylist
PlayMusic
BookRestaurant
SearchScreeningEvent
RateBook
AddToPlaylist
AddToPlaylist
GetWeather
SearchScreeningEvent
SearchScreeningEvent
RateBook
BookRestaurant
GetWeather
RateBook
RateBook
AddToPlaylist
RateBook
AddToPlaylist
PlayMusic
BookRestaurant
AddToPlaylist
RateBook
SearchScreeningEvent
RateBook
GetWeather
PlayMusic
PlayMusic
AddToPlaylist
PlayMusic
SearchCreativeWork
SearchScreeningEvent
AddToPlaylist
SearchScreeningEvent
GetWeather
AddToPlaylist
BookRestaurant
SearchCreativeWork
GetWeather
RateBook
SearchScreeningEvent
SearchScreeningEvent
SearchScreeningEvent
GetWeather
BookRestaurant
RateBook
PlayMusic
PlayMusic
BookRestaurant
RateBook
SearchCreativeWork
RateBook
AddToPlaylist
GetWeather
GetWeather
AddToPlaylist
BookRestaurant
GetWeather
GetWeather
AddToPlaylist
AddToPlaylist
GetWeather
BookRestaurant
GetWeather
PlayMusic
BookRestaurant
PlayMusic
SearchCreativeWork
GetWeather
GetWeather
RateBook
BookRestaurant
SearchCreativeWork
AddToPlaylist
SearchCreativeWork
SearchScreeningEvent
AddToPlaylist
RateBook
GetWeather
SearchCreativeWork
SearchScreeningEvent
BookRestaurant
AddToPlaylist
GetWeather
PlayMusic
AddToPlaylist
GetWeather
PlayMusic
BookRestaurant
SearchCreativeWork
GetWeather
SearchScreeningEvent
SearchScreeningEvent
PlayMusic
SearchCreativeWork
RateBook
SearchScreeningEvent
PlayMusic
RateBook
RateBook
SearchCreativeWork
BookRestaurant
GetWeather
SearchCreativeWork
PlayMusic
GetWeather
RateBook
BookRestaurant
PlayMusic
SearchScreeningEvent
AddToPlaylist
AddToPlaylist
RateBook
SearchCreativeWork
AddToPlaylist
SearchCreativeWork
GetWeather
RateBook
GetWeather
GetWeather
BookRestaurant
BookRestaurant
SearchCreativeWork
BookRestaurant
BookRestaurant
SearchScreeningEvent
SearchCreativeWork
AddToPlaylist
SearchCreativeWork
SearchCreativeWork
BookRestaurant
PlayMusic
AddToPlaylist
BookRestaurant
SearchScreeningEvent
BookRestaurant
PlayMusic
GetWeather
RateBook
SearchScreeningEvent
BookRestaurant
PlayMusic
AddToPlaylist
RateBook
GetWeather
GetWeather
AddToPlaylist
GetWeather
AddToPlaylist
SearchCreativeWork
SearchCreativeWork
PlayMusic
GetWeather
AddToPlaylist
SearchScreeningEvent
PlayMusic
GetWeather
RateBook
PlayMusic
RateBook
RateBook
AddToPlaylist
BookRestaurant
RateBook
PlayMusic
SearchScreeningEvent
RateBook
AddToPlaylist
PlayMusic
PlayMusic
BookRestaurant
SearchScreeningEvent
SearchScreeningEvent
AddToPlaylist
RateBook
SearchCreativeWork
PlayMusic
GetWeather
AddToPlaylist
SearchScreeningEvent
SearchCreativeWork
GetWeather
GetWeather
SearchScreeningEvent
GetWeather
AddToPlaylist
BookRestaurant
SearchScreeningEvent
PlayMusic
AddToPlaylist
SearchScreeningEvent
BookRestaurant
SearchCreativeWork
BookRestaurant
BookRestaurant
BookRestaurant
BookRestaurant
RateBook
PlayMusic
SearchScreeningEvent
PlayMusic
AddToPlaylist
SearchCreativeWork
GetWeather
SearchCreativeWork
GetWeather
GetWeather
SearchScreeningEvent
SearchCreativeWork
AddToPlaylist
SearchScreeningEvent
SearchScreeningEvent
GetWeather
GetWeather
PlayMusic
PlayMusic
BookRestaurant
RateBook
PlayMusic
SearchScreeningEvent
SearchScreeningEvent
GetWeather
SearchScreeningEvent
GetWeather
SearchCreativeWork
SearchCreativeWork
BookRestaurant
SearchScreeningEvent
SearchScreeningEvent
SearchScreeningEvent
RateBook
RateBook
SearchCreativeWork
SearchScreeningEvent
GetWeather
BookRestaurant
PlayMusic
SearchCreativeWork
PlayMusic
BookRestaurant
SearchScreeningEvent
SearchScreeningEvent
PlayMusic
BookRestaurant
SearchCreativeWork
AddToPlaylist
RateBook
PlayMusic
PlayMusic
AddToPlaylist
GetWeather
RateBook
AddToPlaylist
SearchCreativeWork
PlayMusic
BookRestaurant
SearchCreativeWork
BookRestaurant
AddToPlaylist
AddToPlaylist
RateBook
AddToPlaylist
BookRestaurant
SearchScreeningEvent
PlayMusic
AddToPlaylist
RateBook
RateBook
BookRestaurant
SearchCreativeWork
RateBook
SearchScreeningEvent
BookRestaurant
RateBook
GetWeather
SearchScreeningEvent
RateBook
BookRestaurant
AddToPlaylist
AddToPlaylist
PlayMusic
AddToPlaylist
PlayMusic
PlayMusic
SearchScreeningEvent
SearchScreeningEvent
SearchCreativeWork
BookRestaurant
SearchScreeningEvent
AddToPlaylist
SearchCreativeWork
BookRestaurant
SearchCreativeWork
SearchScreeningEvent
SearchCreativeWork
SearchCreativeWork
PlayMusic
BookRestaurant
SearchScreeningEvent
BookRestaurant
SearchCreativeWork
RateBook
PlayMusic
RateBook
GetWeather
GetWeather
RateBook
RateBook
BookRestaurant
AddToPlaylist
PlayMusic
RateBook
SearchScreeningEvent
PlayMusic
BookRestaurant
SearchCreativeWork
RateBook
BookRestaurant
SearchCreativeWork
AddToPlaylist
SearchCreativeWork
BookRestaurant
RateBook
AddToPlaylist
SearchCreativeWork
BookRestaurant
SearchScreeningEvent
PlayMusic
BookRestaurant
GetWeather
SearchCreativeWork
AddToPlaylist
SearchCreativeWork
GetWeather
PlayMusic
PlayMusic
AddToPlaylist
RateBook
SearchScreeningEvent
AddToPlaylist
SearchScreeningEvent
SearchScreeningEvent
SearchCreativeWork
GetWeather
PlayMusic
BookRestaurant
BookRestaurant
SearchScreeningEvent
SearchCreativeWork
SearchCreativeWork
BookRestaurant
GetWeather
BookRestaurant
PlayMusic
GetWeather
PlayMusic
SearchCreativeWork
RateBook
SearchCreativeWork
SearchScreeningEvent
SearchCreativeWork
RateBook
BookRestaurant
BookRestaurant
RateBook
RateBook
SearchCreativeWork
AddToPlaylist
GetWeather
AddToPlaylist
RateBook
SearchScreeningEvent
AddToPlaylist
BookRestaurant
BookRestaurant
BookRestaurant
AddToPlaylist
BookRestaurant
GetWeather
SearchCreativeWork
AddToPlaylist
PlayMusic
RateBook
SearchCreativeWork
RateBook
RateBook
RateBook
PlayMusic
BookRestaurant
BookRestaurant
PlayMusic
SearchCreativeWork
AddToPlaylist
SearchCreativeWork
SearchScreeningEvent
GetWeather
SearchScreeningEvent
RateBook
RateBook
SearchScreeningEvent
PlayMusic
SearchScreeningEvent
AddToPlaylist
PlayMusic
GetWeather
RateBook
RateBook
PlayMusic
GetWeather
SearchScreeningEvent
PlayMusic
SearchCreativeWork
GetWeather
BookRestaurant
SearchScreeningEvent
BookRestaurant
BookRestaurant
GetWeather
SearchCreativeWork
BookRestaurant
AddToPlaylist
AddToPlaylist
PlayMusic
GetWeather
SearchCreativeWork
AddToPlaylist
SearchScreeningEvent
GetWeather
GetWeather
GetWeather
AddToPlaylist
AddToPlaylist
GetWeather
RateBook
AddToPlaylist
PlayMusic
SearchCreativeWork
SearchScreeningEvent
SearchScreeningEvent
BookRestaurant
PlayMusic
BookRestaurant
GetWeather
GetWeather
RateBook
AddToPlaylist
AddToPlaylist
AddToPlaylist
PlayMusic
PlayMusic
SearchCreativeWork
GetWeather
SearchScreeningEvent
SearchScreeningEvent
SearchCreativeWork
PlayMusic
SearchCreativeWork
PlayMusic
GetWeather
SearchScreeningEvent
RateBook
SearchCreativeWork
PlayMusic
SearchCreativeWork
PlayMusic
SearchScreeningEvent
RateBook
SearchCreativeWork
RateBook
BookRestaurant
GetWeather
GetWeather
RateBook
BookRestaurant
BookRestaurant
PlayMusic
BookRestaurant
RateBook
SearchCreativeWork
SearchScreeningEvent
BookRestaurant
RateBook
AddToPlaylist
SearchScreeningEvent
PlayMusic
SearchCreativeWork
RateBook
BookRestaurant
RateBook
PlayMusic
PlayMusic
RateBook
BookRestaurant
SearchScreeningEvent
PlayMusic
GetWeather
SearchCreativeWork
AddToPlaylist
AddToPlaylist
SearchCreativeWork
AddToPlaylist
AddToPlaylist
GetWeather
PlayMusic
SearchCreativeWork
SearchScreeningEvent
BookRestaurant
BookRestaurant
PlayMusic
GetWeather
RateBook
RateBook
GetWeather
AddToPlaylist
SearchScreeningEvent
SearchScreeningEvent
BookRestaurant
SearchCreativeWork
BookRestaurant
BookRestaurant
BookRestaurant
SearchScreeningEvent
SearchScreeningEvent
SearchCreativeWork
AddToPlaylist
GetWeather
AddToPlaylist
GetWeather
RateBook
GetWeather
SearchScreeningEvent
GetWeather
BookRestaurant
AddToPlaylist
GetWeather
RateBook
RateBook
BookRestaurant
SearchScreeningEvent
BookRestaurant
PlayMusic
PlayMusic
PlayMusic
AddToPlaylist
RateBook
RateBook
AddToPlaylist
RateBook
GetWeather
AddToPlaylist
AddToPlaylist
SearchCreativeWork
RateBook
BookRestaurant
SearchScreeningEvent
SearchCreativeWork
SearchCreativeWork
BookRestaurant
RateBook
RateBook
RateBook
BookRestaurant
BookRestaurant
RateBook
RateBook
BookRestaurant
BookRestaurant
SearchScreeningEvent
BookRestaurant
AddToPlaylist
AddToPlaylist
BookRestaurant
RateBook
RateBook
BookRestaurant
PlayMusic
BookRestaurant
SearchScreeningEvent
GetWeather
GetWeather
GetWeather
BookRestaurant
SearchScreeningEvent
SearchScreeningEvent
SearchScreeningEvent
GetWeather
GetWeather
AddToPlaylist
AddToPlaylist
RateBook
GetWeather
RateBook
PlayMusic
SearchScreeningEvent
SearchCreativeWork
PlayMusic
BookRestaurant
BookRestaurant
AddToPlaylist
PlayMusic
RateBook
SearchCreativeWork
GetWeather
SearchCreativeWork
SearchCreativeWork
BookRestaurant
PlayMusic
PlayMusic
PlayMusic
SearchScreeningEvent
SearchCreativeWork
PlayMusic
SearchCreativeWork
RateBook
GetWeather
SearchScreeningEvent
PlayMusic
BookRestaurant
SearchCreativeWork
SearchCreativeWork
GetWeather
GetWeather
AddToPlaylist
BookRestaurant
RateBook
SearchScreeningEvent
SearchScreeningEvent
AddToPlaylist
PlayMusic
SearchScreeningEvent
GetWeather
GetWeather
SearchCreativeWork
GetWeather
AddToPlaylist
AddToPlaylist
PlayMusic
SearchCreativeWork
RateBook
GetWeather
SearchCreativeWork
PlayMusic
PlayMusic
GetWeather
AddToPlaylist
GetWeather
GetWeather
SearchCreativeWork
SearchCreativeWork
SearchCreativeWork
GetWeather
AddToPlaylist
GetWeather
BookRestaurant
BookRestaurant
BookRestaurant
AddToPlaylist
BookRestaurant
SearchScreeningEvent
SearchCreativeWork
SearchScreeningEvent
GetWeather
GetWeather
PlayMusic
SearchScreeningEvent
RateBook
RateBook
SearchScreeningEvent
SearchScreeningEvent
AddToPlaylist
RateBook
SearchCreativeWork
SearchScreeningEvent
AddToPlaylist
AddToPlaylist
AddToPlaylist
GetWeather
SearchCreativeWork
RateBook
BookRestaurant
SearchCreativeWork
BookRestaurant
PlayMusic
RateBook
GetWeather
SearchScreeningEvent
PlayMusic
SearchScreeningEvent
GetWeather
GetWeather
RateBook
AddToPlaylist
SearchScreeningEvent
AddToPlaylist
SearchCreativeWork
AddToPlaylist
RateBook
SearchCreativeWork
SearchCreativeWork
PlayMusic
SearchCreativeWork
SearchScreeningEvent
RateBook
SearchScreeningEvent
BookRestaurant
SearchScreeningEvent
SearchScreeningEvent
SearchScreeningEvent
PlayMusic
SearchScreeningEvent
PlayMusic
SearchCreativeWork
GetWeather
BookRestaurant
BookRestaurant
AddToPlaylist
RateBook
SearchScreeningEvent
RateBook
PlayMusic
SearchScreeningEvent
SearchCreativeWork
BookRestaurant
PlayMusic
PlayMusic
PlayMusic
SearchCreativeWork
SearchCreativeWork
BookRestaurant
RateBook
RateBook
SearchCreativeWork
GetWeather
BookRestaurant
SearchScreeningEvent
SearchScreeningEvent
GetWeather
PlayMusic
GetWeather
AddToPlaylist
BookRestaurant
AddToPlaylist
BookRestaurant
RateBook
AddToPlaylist
SearchCreativeWork
PlayMusic
RateBook
SearchScreeningEvent
SearchScreeningEvent
SearchScreeningEvent
SearchScreeningEvent
AddToPlaylist
AddToPlaylist
GetWeather
AddToPlaylist
PlayMusic
AddToPlaylist
BookRestaurant
SearchScreeningEvent
PlayMusic
PlayMusic
SearchScreeningEvent
SearchScreeningEvent
SearchScreeningEvent
PlayMusic
SearchScreeningEvent
GetWeather
SearchScreeningEvent
SearchScreeningEvent
RateBook
PlayMusic
RateBook
SearchCreativeWork
SearchCreativeWork
GetWeather
SearchCreativeWork
AddToPlaylist
RateBook
PlayMusic
BookRestaurant
SearchCreativeWork
SearchCreativeWork
BookRestaurant
AddToPlaylist
SearchCreativeWork
PlayMusic
SearchScreeningEvent
BookRestaurant
SearchScreeningEvent
PlayMusic
SearchScreeningEvent
RateBook
SearchScreeningEvent
SearchCreativeWork
PlayMusic
BookRestaurant
SearchScreeningEvent
RateBook
PlayMusic
GetWeather
BookRestaurant
BookRestaurant
SearchScreeningEvent
SearchCreativeWork
AddToPlaylist
RateBook
BookRestaurant
SearchScreeningEvent
PlayMusic
PlayMusic
SearchCreativeWork
GetWeather
BookRestaurant
AddToPlaylist
GetWeather
SearchScreeningEvent
AddToPlaylist
SearchScreeningEvent
SearchScreeningEvent
AddToPlaylist
PlayMusic
BookRestaurant
AddToPlaylist
SearchScreeningEvent
PlayMusic
GetWeather
PlayMusic
SearchCreativeWork
PlayMusic
RateBook
AddToPlaylist
BookRestaurant
AddToPlaylist
BookRestaurant
SearchCreativeWork
GetWeather
SearchCreativeWork
SearchCreativeWork
AddToPlaylist
GetWeather
SearchScreeningEvent
AddToPlaylist
PlayMusic
RateBook
GetWeather
RateBook
GetWeather
BookRestaurant
GetWeather
BookRestaurant
SearchCreativeWork
BookRestaurant
BookRestaurant
BookRestaurant
GetWeather
RateBook
GetWeather
GetWeather
GetWeather
RateBook
SearchCreativeWork
SearchCreativeWork
RateBook
PlayMusic
BookRestaurant
BookRestaurant
BookRestaurant
RateBook
SearchCreativeWork
BookRestaurant
RateBook
SearchScreeningEvent
GetWeather
SearchCreativeWork
RateBook
PlayMusic
AddToPlaylist
PlayMusic
RateBook
RateBook
PlayMusic
AddToPlaylist
SearchScreeningEvent
BookRestaurant
SearchScreeningEvent
SearchCreativeWork
SearchScreeningEvent
AddToPlaylist
SearchScreeningEvent
GetWeather
AddToPlaylist
SearchScreeningEvent
PlayMusic
GetWeather
BookRestaurant
GetWeather
PlayMusic
SearchScreeningEvent
GetWeather
GetWeather
BookRestaurant
PlayMusic
BookRestaurant
AddToPlaylist
GetWeather
GetWeather
GetWeather
PlayMusic
RateBook
BookRestaurant
SearchScreeningEvent
RateBook
BookRestaurant
BookRestaurant
BookRestaurant
SearchCreativeWork
PlayMusic
BookRestaurant
SearchCreativeWork
SearchScreeningEvent
PlayMusic
SearchCreativeWork
BookRestaurant
SearchScreeningEvent
SearchScreeningEvent
AddToPlaylist
SearchCreativeWork
RateBook
PlayMusic
GetWeather
BookRestaurant
SearchScreeningEvent
PlayMusic
SearchCreativeWork
AddToPlaylist
GetWeather
RateBook
GetWeather
SearchCreativeWork
AddToPlaylist
GetWeather
SearchScreeningEvent
SearchCreativeWork
SearchScreeningEvent
SearchScreeningEvent
BookRestaurant
PlayMusic
RateBook
AddToPlaylist
RateBook
SearchScreeningEvent
PlayMusic
GetWeather
AddToPlaylist
GetWeather
BookRestaurant
AddToPlaylist
BookRestaurant
RateBook
GetWeather
BookRestaurant
BookRestaurant
BookRestaurant
BookRestaurant
SearchScreeningEvent
AddToPlaylist
SearchCreativeWork
SearchCreativeWork
GetWeather
SearchCreativeWork
RateBook
RateBook
GetWeather
SearchScreeningEvent
PlayMusic
AddToPlaylist
SearchCreativeWork
BookRestaurant
SearchScreeningEvent
SearchScreeningEvent
PlayMusic
BookRestaurant
PlayMusic
GetWeather
SearchCreativeWork
RateBook
AddToPlaylist
SearchCreativeWork
PlayMusic
SearchCreativeWork
SearchCreativeWork
RateBook
SearchCreativeWork
SearchCreativeWork
GetWeather
BookRestaurant
BookRestaurant
SearchCreativeWork
AddToPlaylist
PlayMusic
SearchCreativeWork
RateBook
AddToPlaylist
GetWeather
BookRestaurant
PlayMusic
GetWeather
PlayMusic
SearchCreativeWork
PlayMusic
SearchScreeningEvent
AddToPlaylist
RateBook
GetWeather
PlayMusic
PlayMusic
BookRestaurant
PlayMusic
SearchCreativeWork
GetWeather
PlayMusic
BookRestaurant
PlayMusic
RateBook
AddToPlaylist
PlayMusic
GetWeather
AddToPlaylist
SearchCreativeWork
SearchCreativeWork
PlayMusic
RateBook
RateBook
GetWeather
AddToPlaylist
GetWeather
GetWeather
BookRestaurant
AddToPlaylist
BookRestaurant
SearchCreativeWork
SearchCreativeWork
RateBook
SearchCreativeWork
GetWeather
SearchCreativeWork
RateBook
SearchCreativeWork
SearchScreeningEvent
AddToPlaylist
RateBook
AddToPlaylist
GetWeather
SearchCreativeWork
SearchCreativeWork
SearchScreeningEvent
SearchScreeningEvent
SearchScreeningEvent
SearchCreativeWork
SearchScreeningEvent
RateBook
SearchCreativeWork
BookRestaurant
PlayMusic
BookRestaurant
RateBook
PlayMusic
GetWeather
BookRestaurant
PlayMusic
SearchScreeningEvent
RateBook
SearchScreeningEvent
BookRestaurant
PlayMusic
AddToPlaylist
RateBook
SearchScreeningEvent
BookRestaurant
GetWeather
PlayMusic
SearchScreeningEvent
PlayMusic
SearchCreativeWork
SearchScreeningEvent
RateBook
PlayMusic
GetWeather
PlayMusic
RateBook
SearchScreeningEvent
RateBook
SearchCreativeWork
RateBook
GetWeather
RateBook
BookRestaurant
GetWeather
GetWeather
AddToPlaylist
SearchCreativeWork
PlayMusic
BookRestaurant
SearchScreeningEvent
BookRestaurant
SearchCreativeWork
GetWeather
SearchCreativeWork
BookRestaurant
PlayMusic
AddToPlaylist
AddToPlaylist
PlayMusic
AddToPlaylist
SearchCreativeWork
SearchCreativeWork
SearchScreeningEvent
RateBook
AddToPlaylist
SearchCreativeWork
RateBook
BookRestaurant
GetWeather
RateBook
SearchScreeningEvent
BookRestaurant
SearchScreeningEvent
AddToPlaylist
BookRestaurant
RateBook
GetWeather
BookRestaurant
GetWeather
GetWeather
SearchScreeningEvent
PlayMusic
RateBook
SearchCreativeWork
PlayMusic
PlayMusic
GetWeather
PlayMusic
PlayMusic
BookRestaurant
SearchCreativeWork
SearchScreeningEvent
AddToPlaylist
GetWeather
GetWeather
AddToPlaylist
AddToPlaylist
RateBook
BookRestaurant
SearchScreeningEvent
RateBook
BookRestaurant
BookRestaurant
AddToPlaylist
RateBook
SearchScreeningEvent
RateBook
RateBook
BookRestaurant
PlayMusic
SearchCreativeWork
SearchScreeningEvent
BookRestaurant
GetWeather
GetWeather
PlayMusic
BookRestaurant
GetWeather
RateBook
PlayMusic
SearchCreativeWork
AddToPlaylist
PlayMusic
AddToPlaylist
AddToPlaylist
AddToPlaylist
SearchCreativeWork
PlayMusic
PlayMusic
PlayMusic
PlayMusic
SearchCreativeWork
PlayMusic
BookRestaurant
RateBook
AddToPlaylist
SearchScreeningEvent
PlayMusic
AddToPlaylist
GetWeather
RateBook
GetWeather
PlayMusic
SearchScreeningEvent
SearchCreativeWork
GetWeather
AddToPlaylist
PlayMusic
RateBook
RateBook
PlayMusic
AddToPlaylist
AddToPlaylist
RateBook
SearchCreativeWork
RateBook
SearchCreativeWork
RateBook
SearchCreativeWork
SearchCreativeWork
BookRestaurant
SearchScreeningEvent
PlayMusic
SearchCreativeWork
RateBook
PlayMusic
SearchCreativeWork
BookRestaurant
RateBook
AddToPlaylist
BookRestaurant
SearchScreeningEvent
SearchScreeningEvent
PlayMusic
GetWeather
SearchCreativeWork
BookRestaurant
PlayMusic
BookRestaurant
AddToPlaylist
SearchScreeningEvent
GetWeather
AddToPlaylist
AddToPlaylist
AddToPlaylist
AddToPlaylist
BookRestaurant
AddToPlaylist
BookRestaurant
GetWeather
SearchScreeningEvent
SearchScreeningEvent
PlayMusic
SearchCreativeWork
RateBook
RateBook
RateBook
RateBook
BookRestaurant
RateBook
PlayMusic
BookRestaurant
AddToPlaylist
SearchScreeningEvent
SearchScreeningEvent
RateBook
AddToPlaylist
GetWeather
GetWeather
SearchCreativeWork
RateBook
PlayMusic
SearchScreeningEvent
RateBook
SearchCreativeWork
PlayMusic
BookRestaurant
RateBook
RateBook
GetWeather
GetWeather
PlayMusic
SearchScreeningEvent
SearchCreativeWork
GetWeather
SearchCreativeWork
BookRestaurant
GetWeather
GetWeather
SearchCreativeWork
GetWeather
PlayMusic
SearchScreeningEvent
SearchScreeningEvent
BookRestaurant
GetWeather
SearchScreeningEvent
RateBook
SearchCreativeWork
SearchScreeningEvent
BookRestaurant
BookRestaurant
PlayMusic
RateBook
SearchCreativeWork
RateBook
