# Supplementary material
Source: ML conference proceedings conference paper supplement (https://aclanthology.org/P19-1544)
Supplement: Supplementary [file P19-1544.Supplementary.zip › SF-ID-network/data/snips/train/seq.in]

listen to westbam alumb allergic on google music
add step to me to the 50 clásicos playlist 
i give this current textbook a rating value of 1 and a best rating of 6
play the song little robin redbreast
please add iris dement to my playlist this is selena
add slimm cutta calhoun to my this is prince playlist  
i want to listen to seventies music 
play a popular chant by brian epstein
find fish story 
book a spot for 3 in mt
i need a forecast for jetmore  massachusetts in 1 hour and 1 second from now
rate this series a 5
give me a list of movie times for films in the area 
can you play me some eighties music by adele
please let me know the weather forcast of stanislaus national forest far in nine months
book a restaurant for eight people in six years   
i need to book a restaurant in fork mountain  sc for valarie  mari and i
add to playlist confidence boost here comes santa claus
book a restaurant at sixteen o clock in sc
add another artist to the spotlight on country 2016 playlist  
find a movie house showing cage without a key
add sugarolly days to my list  your favorite slaughterhouse
show me the picture creatures of light and darkness
search for the adventures of cookie & cream
add this track to my global funk
find animated movies nearest at a movie house
play hell house song
give this novel 5 stars
find me showtimes for animated movies in the neighbourhood 
find movie times
play the top-20 best chicane songs on deezer
i want to give this current textbook 4 points 
add manuelita to my indiespensables playlist
show movie schedules for douglas theatre company
i d like to see the show onion sportsdome 
i d like to go to the popular bistro in oh
what s the weather in my current spot the day after tomorrow
play playlist the realest down south
add this artist to gretchen s soul revived playlist
find a video game called victory march
find a novel called industry 
book a taverna that serves vichyssoise within walking distance in oh
let me see the movie schedule for seed of chucky
play a chant by mj cole
what is the weather like in the city of frewen in the country of venezuela
put this song on my playlist  in the name of blues 
will it be colder in ohio
rate this album a 1
in the area find some films
what times will the young swordsman be showing at a local cinema
book a brasserie for one
play all of your toys by chris ledoux
i want to hear a joel hastings melody  
i want to book a restaurant not far from our college 
rate in stars as a 6 for lord of the shadows which gets a four
add rak biszewilo to my playlist named jazz
rate my current book 1 out of 6
what is the weather not far from upper klamath national wildlife refuge
add falling upstairs to the playlist named chill out
will it storm in charles pinckney national historic site
play techno on lastfm
add the entire album into indie español
for the textbook  out of 6 possible i give the following one a 3 
show me the movie schedule for star theatres
please find the movie dancing girl
rate this book 0 out of 6
is happy ghost iii at caribbean cinemas
play theme by yanni on vimeo
rate the current novel a 3 
can you pull up a track on zvooq by graham mcpherson
find resurrection of evil 
find playstation官方杂志  a song
rate the current essay 2 out of 6
add this album to the playlist called dishwashing
find young miss holmes
i give christianity not mysterious 1 out of 6 points 
i d like to go to the venetian theatre in gabon  party of seven
is it supposed to rain nearby my current location at 0 o clock
give zero / 6 stars to the current album
put playa fly onto my 2010 decade playlist
show me the painting called fool for love 
rate what the dog saw a two
find a video game called a stroll in the pork
add bret mckenzie to my pop commute playlist
what is the weather supposed to be like in new jersey three months from now
find the song called international journal of bilingualism
what films are playing at goodrich quality theaters
i rated the island of adventure saga a 2 of 6
i m looking for the trailer of highlands today
add this song to my playlist named wild country
rate the princess mouse: a tale of finland one of 6
search for police women of cincinnati
add artist to lo mejor de los 00 s
i d like johnny nash to be put into my playlist always pop punk
find the they came from somewhere else saga
i want to watch the television show naked ii
book a reservation for a pub with ma po tofu in moldova
show the three tales album
put this album in shuffle syndrome
book me seats for 6 at the best brasserie that serves marche neighboring my hostel
play caitlin cary from the fourties
add a track to my hands up playlist 
i d like to see the saga tamagotchi 64: minna de tamagotchi world
give the search for the snow leopard a rating of zero of 6 stars
for the book tale of the toa i give five points 
will it be warmer now in covenant life
play rap album one by gene vincent 
i want to book the hat for my grandfather and i in arkansas 
book a tea place at seven
find the movie schedule for animated movies around here 
add rosemary clooney to pura vida playlist
i need a reservation for 6 pm  with a party of 10 at sand lake
what is the picture called lest we forget: the best of
find a photograph called call on me 
add tune to my hype playlist
what films are playing at the nearest movie theatre 
add por una cabeza to my playlist called this is new edition
play a scott lafaro soundtrack
add wastedagain to the wild & free workout playlist
add this track to duetos
find an art called cassidy 
i want to eat at a pickled cucumber brasserie in 12 months
give this saga a 1 
add the song to the dub on the beach playlist
i need a table at the ledbury at 18 o clock
will it be humid in beedeville on november 20
i want to give the canon of medicine one out of 6 stars 
play music from 2014
play iheart
please look up the falls church news-press album 
find a television show called merced sun-star 
find the closest movie theatre with films
can you pull up channel m news
play 2011 music 
find a song called be quick or be dead 
is live from sturgis 2006 playing at four o clock at the nearest cinema
she me movie times
put deep purple on this is jennifer lopez
what is the weather in sint maarten
give 5 points to the deathlord of ixia
which films are playing at malco theatres
play lorenzo palacios quispe
add this track to the classical music for smart kids playlist
give five out of 6 to this novel
give two out of 6 to a christmas carol
show movie schedules
find me the picture entitled i’ll take care of you 
give this textbook zero out of 6 points
weather for close-by parc national de kolkheti
i d like a table in a smoking room in a taverna on sep  23  2023
i give it a rating value of four to 6 to a book called liberalism and the limits of justice
add om to my classic punk
rate the current novel 0 of 6
book me a table for seven people at a bar with a pool 
i want to listen to swing music on iheart
rate this essay a two
use netflix to play music
what will the weather be like 19 minutes from now in nepal
include laarni lozada on endorphin rush playlist
make a reservation for 9 at a brasserie with parking
add my track to old school metal playlist
what are the movie schedules for movies around here
what s the weather forecast for moss hill
what will the weather be like not far from alabama on may 9  2037
play takes place in your work space by eddie kendricks
ethiopia ellenton has snow weather at eight pm
find jono and ben
play top-twenty song from 2015
i need seating at floating restaurant in tennessee for a group of 9
play music on groove shark 
give two stars to current chronicle
find the boys in the band 
i d like to find the soundtrack tianjin today evening news
show the philosophy and phenomenological research saga
what are the movie schedules
wish to hear the album since i saw you last
what is the closest movie theatre that is playing moment to moment
find a novel called east liberty
where is the chief cook playing
can you play something from 1966 by mc ren on spotify
play music from 2005 by justin broadrick
i want to add a song by w c clark to my nerding around playlist
add parempi mies to the café con leche playlist  
put this track on alok house party playlist
rate this saga two with a bet rating of 6
find movie times for close by movies 
i give this next essay zero out of 6 points
play me a song by michael diamond
show creativity of all for one
i d like to watch movies at the closest movie theatre
what s the weather going to be in 7 hours in fm
add the crabfish to my playlist called the sleep machine rainforest
where can i find the photograph of mr blobby
what is the forecast for cold temps in nevada
i need a reservation for four this year at a restaurant
play the song jingle bells
play some 1993 concerto off of slacker
book a spot for 1 at a south american restaurant
book a spot at a taverna for my cousin and i in burundi
play the top song from damon albarn using slacker
find the show go with the flow
add heresy and the hotel choir to the evening acoustic playlist
add songs tune in reggae infusions
i give the last textbook one out of 6 points 
book a restaurant on june the fifth in cavour 
add the patty patty sound  to my metal talks kreator playlist
rate this essay a four
book a spot for 4 at a restaurant in shambaugh md
give me the weather forecast for lower lake on sep  21  2038
add slave to the rhythm to the playlist massive soca hits
add the block brochure welcome to the soil 6 onto my café con leche list
looking for video game for those who would walk with the gods
can i get a table at the fort
find the schedule for rare birds at the nearest movie theatre at noon 
rate this chronicle one of 6 points
the current saga deserves a 5 rating  
what will the weather be at my current location on december the 2nd  2029
is goodbye mr  chips showing twelve minutes from now
add testifying to  donna s tokyo rising palylist
when is you walk so softly playing at kerasotes theatres
find the hundred-foot journey
this book gets points for being current and a three
find the magical world of roger whittaker
add dr know to my todo alternativo playlist  
find me the seven-ups
add the name cry like a baby to my a mis niños de 30 playlist
add matthew helders artist in showstopper being mary jane
what is the forecast for temperate weather in bellechester
can you find me the trailer of the hippocratic oath
play the happiest days of our lives by tommy emmanuel
play the fool on the hill by khwaja ghulam farid
book a restaurant not far in milladore for 6 people 
rate the current novel zero points
play a twenties tune by jodie aysha 
play twenties music off of my itunes
rate the firebrand one of 6 stars
book a restaurant for 2 at a cafe that i can get a croissant at
rate the travels of lao can five out of 6
what time is the rocketeer showing
play music from 2015
play inventions for the new season
add this track to new hip hop
can you find the album simplescreenrecorder
add a track to my classical feast playlist 
find the show how to meet the lucky stars
add a kj 52 track to the te quiero playlist  
add the lady bunny album to décadas
book the mustard seed in turks and caicos islands for 9 people 
play some oleg anofriyev from 1960 
play a sound track by tom thacker
book in town for 3 at a restaurant outdoor that is not far
play the concert from philip oakey 1973 concert on netflix
add a tune to my this is marc anthony playlist
is there going to be a depression two hundred sixteen days and a half from now in mill bluff state park
i give this current novel zero stars and a best rating of 6
give 5 out of 6 points to racing the rain
what is the local movie times
what is the forecast for west virginia will it be snowy
what s the forecast for alley  canada
can you put this track onto the playlist the selektor
i want to book a far brasserie that serves minestrone in pa for a party of 9 in 15 minutes
rate this current essay four out of 6 
i need a table at a highly rated diner
rate the current album two points
what s the weather forecast not far from here 
i want to reserve a gastropub that has a spa 
play lastfm pop tunes
play music from the top-5 from artist kenia arias
use netflix to play michael white tune from 1955
find a reservation at a brasserie restaurant nearby sc for a party of ten
add image to the nuclear blast novelties playlist
what s the weather for april 10th  2028 in arkansas
show me the book f-1 grand prix part ii
give me movie times
will it be stormy in ritchey in palau
what movies are scheduled in the neighbourhood
i would give the call of the toad a value of zero and a best rating of 6
give me some hank shermann from 1975 on lastfm
what movies are scheduled at plitt theatres
book a restaurant for 7 people 
find movie schedules at imax corporation
is it hot in gold beach  bahrain 
find the cartel vol  2 novel
can you please give me the forecast for the dominica
show creativity of home brew
book a table at skycity in salado for me and hannah
what is the forecast for sea isle city in louisiana for warmer weather
add the second three years to my workout twerkout playlist
forecast for hardinsburg 20 seconds from now
i need a reservation for four at a bar
rate gilgamesh the king 5 out of 6
add lisa dalbello to my 2015 cma awards nominees list
book the atomic cafe for ten people 
i want to watch manthan
what s the weather in stamps
book a table for 1 person at a popular brasserie in jansen that serves english food
show movie schedule at amco entertainment
i want a restaurant in idaho for 2 of us 
play portsmouth by paul smith on google music 
restaurant in niger for my mom and i
search for the toucher and rich show
play hughie graham by vidyadhar vyas
add tune to my this is animal collective
i want the weather for saint martin next year
is the missing clerk playing
find the movie schedule for pacific theatres 
not yet: a memoir of living and almost dying was one out of 6 stars
show creativity of painting of me too
i am looking for the creative work a wonderful life
add nour mhanna to workday lounge
add natasha to my all things post playlist
add the piano bar to my cindy wilson
i would give the series history decoded: the 10 greatest conspiracies of all time a rating of 3 points
play a seventies ballad by annunzio paolo mantovani on groove shark
find a tv show called shake hands with beef
will it rain here at 13:22:09
give this a 0 for this book
can you add esquivando charcos to my playlist entitled the piano bar
can you use pandora to play a soundtrack from 1999 by david sitek
can you add woman of the world to my playlist entitled duetos
i want to listen to keep the faith
where can i see the show kind of glue
i want to book a table for me and josefa at jacob wirth restaurant in branford 
what time is cinema playing the village priest
play music from 1950
add hold my liquor to electronow
find the tv show tribute to the troops
find the nearest movies at a movie theatre
play new ian mclagan
what s the weather in la pine
can you add some disco to my playlist called genuine r&b
book me a table for two in oakes 
play any song from the eighties
add split the difference to my women s lit playlist
what is the forecast for the current spot for cloudy conditions
book reservations at james d  conrey house at 1 pm for a party of nine
give waiting for the mahatma 5 out of 6 points 
show movie times of films close by
please search the karobar economic daily picture 
find a soundtrack called the christmas shoes 
freud: the mind of the moralist should be rated 2 stars with a best rating of 6
casey chavez  lucinda and karina want to eat at a diner on december the 7th
open zvooq and play the best songs from device
is it going to be cold today in wing
find a movie schedule
can i get the movie schedules for loews cineplex
play something by brian chase 
where can i find tales of ghost castle
i want a table to seat 10 at a close-by to ottumwa that serves osteria and ranch dressing 
i want top-rated veneto cuisine at a restaurant in antietam for 2 
what will the weather be like in port clinton  nebraska around midnight
book a table for ten people at a restaurant that serves noodle
will there be rain next year in new hampshire
rate this series chronicle 0 points
is it forecast to be freezing in benedict
how chilly is it close to hollidaysburg
find films at alamo drafthouse cinema
play some seventies music on netflix 
add blood guts & glory to my this is chopin
rate this textbook four points
please get me a reservation at a restaurant with a pool for manuela and yvonne
rate the beyond black saga a one
i d like to eat at the firehouse restaurant
i want the film for nearest movie theatre
play the ocelot record using zvooq
i d like to give a two rating to the abolition of britain 
this chronicle is a zero out of 6 
rate the best american short stories 2007 one out of 6 points
add deuce to my listas de éxitos playlist
put molly and tenbrooks in the french n  heavy playlist  
what is the american samoa forecast for hot weather
add warpaint in my pre-party list
i give life during wartime a one out of 6 
rate the my beloved world saga a one 
where can i purchase the tv series the mating season
i d like to see the book the royal thousand
find the closest movie house that plays animated movies
i need a reservation for chapter one in west odessa for a party of one
add a tom thacker tune to my rock classics
tell me the weather forecast for here
add this song to my crossroad blues playlist
i want to hear secrets on parade from tommy walter
find a tv show called engaged to the unidentified
is love  marilyn playing
i want to rate the current textbook with 4
where is the closest cinema that features animated movies
 i would give this current book a rating a five and a best rating of 6
let me have the movie schedules for general cinema corporation
what movies are playing at southern theatres
add an artist to the décadas playlist 
what will the weather be like on feb  8  2034 in cedar mountain wilderness
reserve me a table for 10 at a mt cafe for breakfast 
what s the weather going to be like near moldova on fri 
add a-hunting we will go to the emily dickinson playlist
what is the weather in sehlabathebe-nationalpark
find a picture of a breed apart
add this tune by harry connick jr to my jazz brasileiro playlist
when can i see journey to the end of the night
will it be hot in saint jo alaska
book a restaurant that serves bouchée for midnight 
find 300: march to glory  a song
add this song to my list called the birth of cool
book a co table at windows on the world
rate cotton comes to harlem a 2
i want to hear a 1957 theme song
search for the song called journal of the american statistical association
what is the weather forecast close to puerto rico
find a love song
put this song in my funk playlist  please
need a table at a restaurant serving foie gras on halloween for two at northern mariana islands
add tune to electro workout
play russell morris s the singer and the song on netflix 
2 of us want to eat at a restaurant that serves meatballs in vt
find a restaurant for marylou and i within walking distance of my mum s hotel
find me the movie schedule for great escape theatres
book a table for tomorrow for five people 
book a gastropub in rose creek for elevenses 
what s the closest movie theatre showing harbour beat
i m looking for the television show the flame
i want to give the cat who walks through walls a 1
what are the movie times
i want to listen to the album going back to the blue ridge mountains on iheart
will it be windy at 4 pm in ny
play my sophisticated dinner playlist on slacker
play a track by deeyah khan 
is the film goodrich quality theaters playing at 12:26 am
is it supposed to hail in rosenberg in the french polynesia
is it supposed to gt colder in or
what amc theaters is the red dance playing at
give 1 out of 6 to west of january
show me the a-myin-thit tv series
is cape mount nature conservation unit has storm weather
tell me if it ll be chilly 1 second from now here
can you play some eighties music
add the wee wee man to pamela s stress relief playlist
i m looking for a novel called and then there was light 
rate this textbook a one
add the avispa track to my bass gaming playlist 
add tune to cleaning the house
rate the current novel a two
please add this song to madden nfl 16
for the book icon of evil  i rate a 2
play a top symphony sort form 1959 by stuart garrard 
what time will the movie house be showing on the beat
i need a diner
what is the weather forecast for wolin national park three seconds from now
i wish to listen to good symphony music by mi lu bing 
can i get the listings for the film at the nearest movie theatre
how cold is it in princeton junction
add this artist to my jazz playlist
will it get warmer in holy cross wilderness
i d like to watch army at wanda group
please find me chance pe dance 
rate the rats chronicle 5 of 6
book a table for four in orchard grass hills  nv
i am giving this current essay zero out of 6 stars
show me movies in the area
find do you wanna touch me  a song
i want to give this essay zero out of 6
add dahmer to hiphop hot 50
rate the demolished man a five 
add angela au to the playlist radar latino
find a feather in her hat at magic johnson theatres
i would like to book a puglia food court in ky
what is the forecast at four am in zambia
i want lance king in my list called one love
when can i catch a screening of shivers in summer
add chris de burgh  in my playlist melancholia
what is the weather at the current position
is it going to be warmer in central cebu protected landscape
add troy andrews to my pop punk powerhouses
add a tune to rare groove
play my melodious playlist
find a movie theatre with rogues and romance that is nearest
find the stone free game
can i get todays movie schedule for the movies that are close by
i d like a table for 10 at a distant place downtown for next fall
show me the song spiderman of the rings
play some showtunes music 
play alles heeft ritme by liu tianhua 
in one hundred twenty seven days i d like to eat at a pizzeria in north lima
give the resistance 2 out of 6 stars 
give 0 out of 6 stars to reality of certainty
is it going to be rainy in kings valley  kosovo next mon 
is it chilly in ecola state park at 2 pm
what s the forecast for gamaliel
book a restaurant in fort gates  fl
play dave mason s soundtrack on last fm 
book a restaurant for me and rosemary at 1 am
rate this current novel one points 
please get me the welcome to the rileys game 
play me the greatest track of 1966
add sam moran music to my tgif playlist
find movie schedules 
find a photograph called xquery api for java
can i hear a da brat ep
find the schedule for the closest films at a cinema at meal time 
move this tune by hironobu kageyama to my baila reggaeton playlist
book a highly rated fast food restaurant in falmouth 
give the current album a score of five out of 6
add billy strayhorn to my highway 61 playlist
show movies in the neighborhood
i d like a table for 6 at a restaurant in denmark at 22
give the televised morality series a one 
add munia the tale to my playlist called adrenaline workout
will it be foggy in the same area of parc provincial kettle lakes on february the thirteenth  2018
please add checkmate to my irish folk – jigs & reels playlist
play the lure of the mask song
i rate this novel  2 of 6 points
let me listen to the music of nature album by paul draper 
what s the weather in koontz lake
find the schedule for the tooth will out at sunrise 
i d like to watch three word brand at the cinema
find movie schedules for nearby films 
what time do the movies play at southern theatres
play the soundtrack that tom bellamy contributed to
i want a table for four at a place in california
0 stars for this textbook 
play a song from 1990 on netflix
rate the chronicle following a 4
play in your eyes by gareth gates on netflix
i would give this novel a rating of two
i need a restaurant that has internet access for a party of six
add this tune to the heavy gamer playlist 
play music from 1960
what movies are playing at regal entertainment group
play fill yourself with music by ray manzarek
the current book i m reading is only worthy of a 3  
book a table for ten people in eucalyptus hills 
the boring peace on earth gets a two out of 6  
show me schedules to see a film with me in it 
is it forecast to be chilly in iowa
i want to see the trailer amor puro
show creative photograph named none of the above
please book a coffeehouse restaurant type room to accommodate gretchen  trisha and amber which serves pastelaria dish
book a restaurant at tennessee
find movies around here with movie schedules
i want to hear a track from the fourties 
book me top-rated restaurant for 9 members for midnight at fair bluff ri
find the trailer for seven year itch 
i want to find a salami restaurant in bastian in
make me a reservation in tn somewhere nearby for a party of 4
i would give dead man falling 5 points and a best rating of 6
play a trailer for sencha touch
find the movie times at consolidated theatres 
book a table for 2 in gleed 
find movie times
can i get the showtimes for the man who could talk to kids
what time does tie a yellow ribbon play at magic johnson theatres
i need a table at somewhere within walking distance of nv on november the 24th  2027
add mg the visionary to my dubstep playlist
give one out of 6 stars to free market fairness
i want to book a meal at a restaurant that searves kouglof 
i d like seats for five at a place in verden right now
when is for lovers only playing
rate this essay 5 of 6
will there be cloud action in saint bernard  virgin islands
when is beyond my reach scheduled at the nearest cinema
i d like to eat a restaurant in or nearby pelahatchie at 12 o clock
play the wizard and i on zvooq
add connee boswell to the relaxing playlist 
book a table for 3 far from tullytown at a coffeehouse with a smoking room
book midday at a faraway cuban place for five at a top-rated bakery in grainola
forecast in layhigh
play music from carina round
add this track to my party playlist
me and my niece want to eat somewhere close by hopatcong
will it be chillier in suwannee
what is the weather forecast for my current position
play me a song from 1968 on spotify
add run rudolph run to my rockin  playlist
rate the starship trap 5 stars
for the playlist this is mozart add nana mizuki live fighter -blue x red side-
i would like ignacio figueredo s tune added to electronow 
please provide me with movie schedules 
find the song titled the rivalry: red v  blue
add jason webley to classical intimate dinner playlist
add album to my classical essentials playlist
i need the movie schedules for century theatres
find a tale of two cities  a painting
i need to reserve a seat for one in sd at a brasserie restaurant   
use the service lastfm to play music by the artist ai kago
find switching channels
which movies are playing at amc theaters
rate this essay zero out of 6
find bal ganesh 2  a video game
add teriazume to the nação reggae playlist
rate this book titled the clue in the old album one out of 6 stars
what s the weather for this year in oregon
rate the book the devil in velvet 4 out of 6 points
i d give the cricket in times square 3 stars
find the endangered species song
rate this album a one 
show the day the earth caught fire movie
the current series deserves three stars  
book reservations not far from our neighborhood for a party of 2
add the track bg knocc out to the rapcaviar playlist
what s the weather looking like right now in croatia
contemporary religious satanism gets a 3 rating  
let s hear some tunes from the thirties 
list films in the neighborhood 
i want to put a copy of this tune into skatepark punks
find a soundtrack for meditations
i d like to watch glass chin at the movie house at 17:32:30
book close-by for 1 in south dakota
can you play a song by ken
is there any creative work for heterocycles
what films are at the nearest movie theatre
add track nature noise to my playlist
there s a famous painting called thursday  do you have an image of it
add steve winwood to my playlist old school metal
what s the weather like in kaltag
add teddy boy to my irish folk – jigs & reels playlist
play me the most popular peja song on slacker
is it going to be chilly at nine am in doolittle
will it be hotter netherlands antilles flats on april the 27th
i want to rate hostile waters chronicle book with five out of 6
play a 1999 track by pete seeger on youtube
what s the weather in twenty five days in hagerman national wildlife refuge
play theme music from the twenties by tata young
where is the closest cinema playing good night good morning
what s the weather going to be like here at ten am
find as live as it gets
will it be freezing 5 seconds from now  in patmos
rate the current book 0 stars
will it be freezing in 5 weeks from now in nh
add nana tanimura  to a sudden rainstorm
what s the closest movie house showing night in may
what time is 26 years diary showing in the movie house
add cj snare to my indie mim playlist
add already over  pt 2 to hip hop 2017 new school
give the current album a four 
play jeff pilson on youtube
what is the weather like right now for fort adams
find a cinema nearest with sulle sathya
book a restaurant in palestine for 8 people at 9 am
how will the weather be five weeks from now in moneta
what animated movies are there nearby
1 minute from now  i will need reservations at a restaurant in vanlue 
what will the weather be like at ten am in austria
i give the spirit of st  louis a 1
add party with friends by constructs of the state to juliana s playlist
list movie schedules at showcase cinemas
the current novel i m reading gets only a one out of 6 
play a chant by marina verenikina
add hot house to have you met miss jones
play a song from 1973 
i want to give the current novel 5 out of 6 points
play new track from the fifties
i give the previous series four stars 
book a latin cuisine pub for 2 on september the 13th  2037 in kazakhstan
add an album to my playlist bachata lovers
find an album called from the terrace
book a spot for me and my sister at a restaurant that has clafoutis
give the current novel four points 
warriors of legend gets a 3 out of 6
i wish to give this textbook a zero out of 6 points
would like to find the trailer for an experiment with time
book a restautant in north dakota at a bistro that is indoor
what is the movie schedule for the cooper foundation
is it going to be cold once i get within walking distance of my home in new caledonia
find a tv show called ride the wind
tell me if it ll be freezing 333 days from now in caplinger mills  florida
play a karin dreijer andersson soundtrack on groove shark
add buddy tate to just dance by aftercluv list
i want to listen to the song first time for everything
play the track siberian khatru on zvooq
i want the turbonegro album to go on the playlist called genuine r&b
will there be wind on january 24  2019 in ransom
when is sunrise in american samoa
i want to hear a top-50 track from takahito eguchi on google music
play phil spalding soundtrack from the seventies
the mad scientist hall of fame gets only a two out of 6
i would rate oblivion: stories a two
can i book a restaurant that serves pastelaria in takilma  virgin islands
search for trailer jazz impressions of the u s a 
how is the forecast for ok
play movement by duane allman 
find movie times for nine pm 
add this song to brooklyn beat
add htoo ein thin to my brooklyn beat playlist  
i d like to watch episodes from the tv series  the secret of queen anne or musketeers thirty years after 
what time is summer school playing
play some music from 2011 on lastfm 
add the artist todd snider  to my electro latino playlist
make me a reservation in hardesty at a joint the is indoor
show me bâton rouge
play music from the list indie electronics
i need to book a restaurant for five in liberia at the maisonette
weather for turtle river state park
play the album qr iii by bobby bare
rate this series two of 6
will it get windy in ocean breeze park
i want the movie perseo miranda and his theatre
rate the woven path one stars
play some music on groove shark 
add this album to my forever country playlist
what theater is showing from paris with love and when
book a table for january the twentieth at a place far from your daughter s campus
can i get the movie schedules
add track to hit remix
open groove shark and play sound track from dj cameo
this album deserves a 0 of 6 possible
book a restaurant for 2 at top-rated hoonah tn
book a restaurant 
find the last angry moose
what is the movie schedules at for douglas theatre company at 0 p m 
play music from 2012 on google music
add 2120 south michigan avenue to my laundry playlist
find the movie schedule for animated movies in the area 
i need a top-rated gastropub for 5 in dc in conshohocken on jul  the 18th  2024
find the flying scotsman
i m looking to book a reservation in aruba at a place nearby 
find the movie schedule for movies close by 
in bon secour national wildlife refuge at twelve pm will it be chilly
put hampartsoum limondjian in running to rock 170 to 190 bpm
i want to listen to speed metal symphony
this album deserves to be rated one out of 6
add the nastya kamenskih song to my the martin garrix show playlist 
find a movie house nearest for films
give me the forecast for here on february the sixteenth  2022
rate the current essay zero points
add song to my el mejor pop en español
what s the weather forecast for the dominican republic
can you add honey hush to hits of the 60s
i m looking for the trailer to evil or divine - live in new york city 
add this song to my love hurts playlist
play eighties music
i would like to rate the current book i am reading 0 stars 
play a popular sort of fifties tune music
rate this essay a 3
me and imelda want a reservation in missouri at seven am
give 5 out of 6 points to absolutely  positively not series
find a book called outpost firewall pro
play some eddie vinson on deezer
rate lords of the rim zero stars
add this tune to my wine & dine playlist
the voyage of the dawn treader deserves 5 points 
tell me the weather forecast for carmichaels  gambia at one am
i want television show come again smith
i want to hear some twenties music from billy sheehan
add the tune to my chill hits playlist 
i want to book a restaurant in neshanic station nigeria for 06:18:13 pm
will it get hotter in hext
i want to watch the trailer ad nauseam
will it be getting warmer in rainbow falls provincial park
what time is the closet cinema playing movies the closest
book a food court in raytown arizona that serves green bean casserole on july 20th 
rate the agent of death with five stars out of 6
i am giving this current novel 1 out of 6 stars
find good night  and good luck at a cinemark theatres
play isham jones
show fog conditions at 7 am in nh
look for the creative work the testament of gideon mack
what time will in the name of the son be playing
rate through distant worlds and times 5 of 6 points
when is longwave going to be playing
rate the current essay with 4 points
show me the out with my baby photograph
add inconfundible to the piano in the background playlist  
play chant music by pappu venugopala rao on slacker 
what are the showings for the natural history of parking lots movie house
what will the weather be like in 1 minute in my current position
the book history of shit should be rated 2 out of 6 
add song in playlist metal monday
add hold tight to my throwback party
where can i find movie schedules
tell me the weather for next week at cathedral state park
i need a table in neighboring carencro at the bridge round house
what is the weather going to be like in flint hill in 9 years  
rate the sail and steam navy list 5 stars
rate the current essay 5 stars
can you search city of scars
find the trailer platinum in da ghetto
will it be chillier in ruskin
when is purple heart scheduled at the nearest movie house
nancy  elma ruiz and molly want to eat at a restaurant in gibraltar
party of two for a food truck on december 22 that serves chicken french in bolivia
is it forecast to be rainy in winchell  mississippi
what will the weather be in peru
i want the photograph of walt before mickey
show weather forecast in west wildwood south carolina
add autry inman to my hanging out and relaxing playlist 
play a tune from 1973
what time is balkan rhapsodies: 78 measures of war playing at malco theatres
i d like to see jacksonville daily progress saga
weather for south williamsport
add the track to the comedy new releases playlist 
add a track to my alok house party playlist
add nazad  nazad  kalino mome to escapada
open lastfm and play hot lips page from the sixties
is it hotter now in hicks
what time is roy colt & winchester jack playing at movie house
book a restaurant in the marshall islands for two people 
i want cocco added to my post metal playlist  
will there be snowfall in ky
give 3 / 6 stars to doctor in the house
rate current album five
add elkie brooks to happy birthday playlist
will it be cold close-by iowa on september twenty-first  2025
play music by paul mccartney
which cinema can i go to to see lilly the witch: the dragon and the magic book
give me the schedule for animated movies at the nearest cinema
can i see the encounters
show me the nearest movie house showing he won a ranch
give the whisperer a rating of 0 
where can i find the song red back fever
what is the nearest movie theatre playing kate y leopold
what films are going to be playing at harkins theatres at zero a m 
book a popular joint in ocean gate for seven people at elevenses 
find a movie schedule
what movies are playing one hour from now at cooper foundation
show me live at the kings center
show the whispering willows novel
please look up for disney universe 
add this song to my classical dance music ballet & beyond list
book a taverna in wisconsin for 22:54 
play valerij kipelov on vimeo
book a best steakhouse for 2 in montserrat on 79 days and a half from now
play the best sebastian karlsson melody on youtube
play some music on netflix
i need a reservation for a tea house in maple glen for four people
add rock & roll to my playlist named night out
what s the weather like in wyandotte netherlands antilles
what is the weather forecast in va
add vyechnyy strannik to lo que suena new york
i want to know the films playing at the closest movie house 
look up the baltic times picture
find the movie everywhere but home
rate the man who sold the moon a 5 
give the lost world 2 points
the sins of the cities of the plain gets a rating of one
i give the next textbook a 2 
what s the forecast for walker bay nature reserve for next year
add chamberlain waits to my picnic in the park
i d like to eat at a highly rated swiss restaurant in irma at two pm
i d rate shohola falls a two out of 6 
is salò the tv show available to watch anywhere
play isaac yamma slut
the this is kevin johansen playlist needs the lamb lies down on broadway in it 
i want to play the video game called china seas
add dying mapa i to más que amigos
will it be warmer in ct
rate competitors 2 stars out of 6
will the sky be overcast around jan  28 in ok
in delanson 1 hour from now reserve a table for four
add sarah vaughan to the spa treatment playlist 
book a table for 8 people at robinson house 
i want to hear some psychedelic rock
play some sonu niigaam from the fifties
find return to krondor 
add javine hylton to my evening playlist
is there a snowstorm in the forecast for saint helena
love in paris needs some frank farian in the playlist  
use pandora to play music from maki onaga from the album made in the nineties
play larry graham sound track
i would give this current textbook five points or a rating of 6
find wxhexeditor 
i would like to rate this album 3 points and a best rating of 6
how will the weather be in 11 years from now in the same area of florida
add the open door to autumn music
find the schedule for across the line at the closest movie house 
i need to book a table at a place around here in pa for a party of two
play the album wayning moments by rabbit brown
play matt walker tunes
rate the white body of evening  one of 6
add album to bajo las estrellas
find the novel wwe legends of wrestlemania
play the top-twenty from tony calder off slacker 
can i get some russian cuisine at a restaurant with shari and i
i m in the mood to listen to meditative music 
tell me the weather forecast 1 hour from now for town west  nevada
what is the movie schedule at cineplex odeon corporation 12 hours from now
will it be stormy in deposit
in 1 week is there going to be a depression in washington
is it going to be cloudy in my current spot for dinner
weather in bashkirsky nature reserve 20 days from now
rate the book series i  robot one out of 6 stars
i rate mosses from an old manse a 0
add bonga to the black sabbath the dio years playlist
show creativity of adobe air
add sam sparro to my playlist called beach vibes
play me something from the thirties by candi staton on vimeo
my group of seven wants to eat at yogurt mountain in slick tonight 
please find me the game called the salvation 
please make reservations for 4 for the hog fry from the food truck
what s the nearest movie theatre showing movies
at amc theaters what is the movie schedule
book table to a tavern for a scrapple for harriett  deanne and i
play good pure soul on netflix 
please tell me movie times
show me half a life
will it be cloudy in tatamy
what s the weather in castle at 17:43
i give the universe maker a rating of zero
how is the humidity near my current place
book a restaurant in delhi arkansas for three people 
what is the weather in åland 4 seconds from now
what is the weather here
add yoshiki to the 35 soul classics 1970 to 1975 playlist
is there going to be any cloud cover today at mccracken in az
i need a movie schedule for any films playing close by
what are the movie times for movies close by
add vl mike to my dcode2016 playlist
is storm warning playing
i need a reservation for four at a restaurant in 1 hour and 1 second
play joey fatone soundtrack tunes from google music from 1972
what is the weather of sri lanka
what will be the wind speed at the current place
give 4 stars to this essay
show me dombey and son movies 
put michael cretu onto my beach vibes playlist
play a ballad from 1997 
find the earth is a sinful song
add this artist to metal party
what is the weather forecast for åland
give this series 3 stars
give me the showtimes for the rum diary at mjr theatres at meal time 
add paloma negra to my funky jams list
add some martine mccutcheon to my original columbia jazzmasters list
rate the natural a 4
play music from the album evolution of a man by joey ramone
how is weather here
add tune to my is it new wave
what is the weather forecast for sunset in bouvet island
rate tragedy day a 4
find bullet and a target  a television show
add another album to my this is pavarotti playlist  
i need reservations for a party of 3 on all souls  day in temperance  north dakota
play crossroad blues 
play used to love her to my this is animal collective playlist
what is the movie schedules for movies in the area 
rate the promise 1 points
for this current saga i give 5 out of 6 possiable points 
what time is the mailman playing
find me nights in harlem
the rats of hamelin deserves zero points
play some chanson music
add fair charlotte to the we everywhere playlist 
find the american journal of sports medicine picture
will it be chilly 17 hours from now in cold creek conservation area
find show-ya 20th anniversary the best 
please get me the before crisis: final fantasy vii television show 
rate this novel a two
book a restaurant in almyra in 10 years 
will it be overcast at 18 o clock in id
what animated movies are playing amc theaters
add sara hickman to my targeted list
rate short trips: destination prague five out of 6
find meal time movie times close by for movies
is it chillier at narew national park
i need a restaurant on july 18th in rose bud
tell me if it ll be temperate three hours from now in bonaire
i need a table at the apple pan for reva and bernadine
what is the forecast in kearneysville
i rate egg collecting and bird life of australia a zero out of 6 points
what s the weather look like for mh
show me the live~legend 1999 & 1997 apocalypse tv show
what time is the wanda group playing the honor of an outlaw
i want to add the classical moments in movies track to my playlist
add to my verano list a song by andy lee
will it get foggy in spring hill
is the weather going to be colder in gu in 11 years 
what time will the age of success be showing
play the top jazz record from 1951
can you let me know where i can watch the nest
play a fifties theme on lastfm 
christie  concepcion and i want to eat trattoria at a brasserie in johnston now
play a 1998 sound track  from sam the kid on last fm
find war & peace vol  1
find a soundtrack called billboard hot r&b hits: 1981
i want to book a restaurant far from the municipal borough of mitcham for 10 people 
tell me if it ll blizzard in ks
rate this essay two points out of 6
why buffy matters is zero out of 6 points 
play a soundtrack by musical artist jimmy james
book a tyrolean restaurant in crocker indiana now for 3 people 
show song schedule come into the world
book sot for 22 minutes from now at a restaurant with parking
rate this novel 1 of 6
book a highly rated gastropub that has a pastelaria in blue anchor  md in 55 weeks for my brother in law and i
is the forecast windy now in fort myers shores arizona
i need to book a table at a nearby restaurant
book a table at a osteria type restaurant in sd
please help me find the bloom: remix album song 
play les pauvres riches by pan mei chen 
find a tv show called zen: the music of fred katz 
out of 6  i give the following book zero 
edit top 100 indie tracks on spotify playlist by adding smokefree rockquest 2005
show texas review of entertainment & sports law creative song
put edwyn collins onto my trabajo relax playlist
find taskcracker for outlook  a game
show the movie schedule at regal entertainment group
what is the movie schedule like
what animated movies are playing at dipson theatres
i rate american history: a survey a 5
my father in law and i would like to go to a highly rated bar
rate the book saga west with the night a 2
play fifties music by ahmed abdul malik
i need a table at a restaurant that serves toast eleven months from now
will it get chillier here
play music from 2002
i d like to book a table at black horse tavern in georgia at 4 am
put this album on my wine & dine playlist
play the greatest ballad from the seventies
what time is i know that you know that i know lpaying
look up the cool cafe: cool tape vol  1 video game
give this essay four stars / 6 
check the forecast for keene 
is holy matrimony playing at national amusements
weather for july 1 in ut
i want to give the current novel 4 stars
i d rate the current essay 1 stars
what will be the humidity 5 years from now  in bradbury mountain state park
play elitsa todorova music
rate unlimited power 4 of 6 points
i want to rate this current series a value of five and a best rating of 6
play new teo macero
can you pull up and play something on itunes
rate 5 out of 6 points to my favorite fantasy story
can you let me know when talk of the devil is playing at the movie theatre
add the track to the best metal of the new millennium playlist 
give me the showtimes for down where the buffalo go at amco entertainment
show me the song the incredible hulk returns
play lenny kaye music 
play me a chris needham song on vimeo
play a melody by colin blunstone
rate this book four points
is it supposed to get chilly in dewey
want to add pacific ocean blues to the playlist named lunch
i want to book a bar neighboring our apartment 
i d rate the current essay as a 2
play the top of emil de cou
is it going to be sunny at 21 o clock close-by district of columbia
find me the lace and whiskey soundtrack
i d like to play the top ten mickdeth on google music
play the playlist funtime activity 
play a ballad from 2000
i m looking for the work titled converging conspiracies
a conspiracy of paper deserves a solid 3
find the novel a civil war: army vs  navy
is there a depression in weather at my current spot
what s the weather forecast for my current location on jun  2
i give the current textbook 0 of 6 points
what s the forecast for little silver
i would give this textbook a rating of 0 and a best rating of 6
is it hot in bolivia
play music by christian bautista
i d like a table for five at any restaurant
play drive playlist
play my futuros hits playlist on spotify 
add artist danny carey to my classic jazz singers playlist  
add this album to my just dance by aftercluv playlist
what is the movie schedule 1 second from now
is it freezing in tira
is a charming man playing at lunch time
what s the weather on bird island burkina at shavuot
play that stubborn kinda fellow by michael amott
what s the weather forecast for elida  rhode island
book a restaurant with parking facility for 3 
find the painting the adventures of teddy ruxpin
find a reservation at the roseland theater at 10 pm
i would rate the executive power a four and a best rating of 6
add this song to my roadrunner rec new releases list 
add this track by clem burke to my atmospheric black metal playlist
when is lake city playing at dipson theatres
i would give bones of the earth 2 points
play some melody from the eighties on spotify
add a song to my playlist a peaceful rush hour
add family tree to conexiones
add mr j medeiros to my women of country playlist 
add this album by bruce dickinson onto top entrevistas my playlist
search for the un provinciale a new york tv show
let me hear the top album by the artist  skin 
add this artist to my guilty pleasures playlist
please rate the current album 4 stars 
what time are films showing at kb theatres
find a tv show called perfect chemistry
add a tune to my elrow guest list
please put live with me onto my playlist named carácter latino
find movie schedules 
rate notes from the internet apocalypse four of 6 stars
play 1962 music on netflix
will it be colder in tallgrass prairie national preserve
what s the weather like at sunset hills
rate gota’s war a one
find trauma center: new blood  an album
i need a table at a brasserie in belgium
add song to top 100 country tracks on spotify 
add a kiley dean tune to my jazz for loving couples playlist 
i need information on movie schedules
book a restaurant in the dominican republic in one minute for a party of eight
i give the french suicide 5 stars
is it foggy in shelter island
find a television show called sensation comics
i need a reservation for a gastropub that serves a maple bacon donut
play the best 1981 sound track from ric fierabracci
what time is the dungeonmaster playing at amc theaters
stars for this album are one for the current 6 ratings
play print the legend soundtrack
add the name covenant to the playlist fusion fest
whats the weather in irma
is millions in the air playing at the cinema
is there a chinese wikipedia
what is the nearest movie house showing animated movies
tell me if it ll be temperate in 8 seconds in guatemala
i need reservations at khedive palace that s close in town 
will it be windy in breaux bridge  turks and caicos islands eleven hours from now
what was the weather like last may at altai tavan bogd national park
add album to mellow bars
find the saint in new york  a show
is it going to be sunny at five pm in chatyrkul wildlife refuge
play trailer of do whatever turns you on
will it get chillier in 12 years  in greenland
forecast for guatemala
i want to bring six of us to a bistro in town that serves hot chicken sandwich that is within the same area 
i m looking for the video game called the supernatural events on campus
book a bar in sc in leonville
rate  body of secrets one stars
i d like to eat at a pho restaurant in vt
i want to listen to the music of ghost in the shell: stand alone complex
is warhead playing at amc theaters
rate the previous novel a 1 out of 6
play fifties music
where can i see the trailer for experienced ii: embrace tour 2013 budokan
will it be sunny in spain on 3/26/2023
book a spot for two at a churrascaria that sells cupcake in lumpkin indiana now
add tune digster reggae
show me the movie schedule in the area near my home at seven am for animated movies
i need a table for 2 on feb  18 at main deli steak house
look for the movie darkness come alive
i m looking to get a seat at a brasserie in togo 
this is a 1 star textbook
find out what films are being played in the neighbourhood
i want to find night of the hunter
book a brasserie with a pool within the same area as my neighborhood for 5 people at 19:26
rate the casualties of peace series one of 6
please help me find the video game john michael montgomery discography 
i want to hear the top tim madison
add magnifico to michele s playlist called 88 keys 
i want to take my mom and i to the tea house
find a game called so long self
what is the movie schedule for films that are playing nearby in 15 minutes
play movement music from sheryfa luna
book reservations at a restaurant in jersey for six people next october
give me the movie listings at the closest cinema please 
what time is crawlspace playing at the caribbean cinemas
find night of passion
i give the vinyl cafe notebooks a 0 of 6
rate this book 0 of 6 points
what is the painting forever malcolm young
what time is the corner playing
rate the current series a one 
find trivial pursuit: america plays
i would give this current chronicle three points
can i get the showtimes for the kitchen toto at cineplex odeon corporation 
will there be a storm on christmas day in my current place
show me a picture of love
give 3 / 6 stars to the simon & schuster encyclopedia of dinosaurs and prehistoric creatures
please let me know the weather forecast in louisiana state
i want to give this textbook four out of 6 
find a coffeehouse in illinois for three
i want a table for 8 in plain on aug  5
add curse song to my playlist guest list engadget
show movie times for movies in the area
find time for hendthighelbedi at the nearest cinema
book tea at the hamburger wagon for 3 vickie reed  melody and i in georgia
rate alfred kropp: the thirteenth skull 3 out of 6
give two star to as long as we both shall live book
find endless horizons
is it supposed to be chilly in de tonight
play music from 1999
what s the weather far away in estonia
find a movie called no  1 in heaven 
i give a rating of 3 to the ultimate resource 
i m looking for a soundtrack titled bowie at the beeb
add ik tara to laundry playlst
i m looking for the game called summer of fear
book a restaurant for jul  27
give me the morning movie schedules
play the newest twenties melody 
show me the movie schedule for nearby movies 
find me a showing of the vanquished that starts nine hours and 1 second from now 
book a highly rated restaurant in central african republic for 5 people on sep  the second
use iheart to listen to retro
play some rap on pandora
find thyme travel
book a food truck in mp for me and my ex husband 
play slacker tunes
put do you love me on my acoustic soul playlist
find reverence for me
will it be rainy at 8 in dans mountain state park
find an album called burnout: the ultimate drag race challenge
add welcome to the cruel world to my reggae classics
find the schedule for the nightmare six hours from now at the nearest cinema 
play the top-fifty theme songs by dennis brown 
use vimeo to play a mark king record from 1993
book a table at a restaurant in lucerne valley that serves chicken nugget
i want to listen to born on the bayou on iheart
i want a table for my grandson and i somewhere in arkansas
i didn t like the book nobody lives for ever  i give it a 2 
find partners in action at dickinson theatres
add bronislau kaper to the drive playlist 
can you get the weather forecast for new baden 
add name me & the rhythm to my chill out music
give four out of 6 points to this essay
what s the weather forecast for coats
play intense studying playlist on itunes 
play dj cameo on itunes 
book me a bar that s highly rated for georgia and i in burkina
rate definitely dead saga 5 points out of 6
casey and i will be in kentucky for food 
book a table for chasity and i in vanuatu
i d give the main-travelled roads series 0 points out of 6
find live at bearsville theater
i d like a table at a top-rated tea house with javanese cuisine this week in germany
add heart like a hurricane to digster soul classics
add artist to my phunkadelic playlist
what are the movie schedules
play me a song from the fourties
put paula abdul on musica española 2017
find a video game called no parking on the dance floor 
put this album on my conexiones list 
tell me the weather forecast for northern mariana islands one second from now
will it get cold in nevada seven weeks and a half from now
rate my current novel 0 out of 6 points
give me the movie schedule for the great escape theatres
give 5 out of 6 stars to coming home
give 4 points to this textbook
can you add something by gregori chad petree to the playlist digster soul classics
what time is the burning season playing
please add a song to ines s playlist called metal party
play baby workout
is there going to be snowfall in alton
book me a top-rated pub
add hallucinations of despair to my this is trey songz playlist 
please book a restaurant for 45 weeks from now in fm
rate trailer geek chic
what is the nearest movie theatre playing the collaborators
this current book is worth five
play some twenties chant music on slacker
show me movie schedules
play a music ballad from the sixties
add five stars to my current chronicle
play me the greatest chant by laurel aitken on lastfm 
play lastfm by steampunk
please put this track onto letha s signed xoxo playlist
play something by louis nelson delisle 
what animated movies are playing now in the neighborhood 
will it be snowy in florewood state park
when can i watch alice: a true story at amc theatres
is it forecast to be chillier around texas
book a spot for 3 in egypt at five
where can i see the somme starting at 16:01:04
is the clowns at the nearest cinema 
add the artist to my 31 minutos playlist
is the mystery of betty bonn playing at twelve a m  at the nearest movie house
what time is living is easy with eyes closed playing
please check whether any animated movies will be running in the area around 04:34:15 pm 
i am looking for a creative work called something warm
i have to give this current essay a rating of three
i want to give this textbook 3 out of 6 points
play thirties music by flex on google music
what will the weather be like 1 second from now in pugu hills forest reserve
give the phantom ship a zero 
tell me the closest movie house playing black rage
what is playing for movies at b&b theatres
find book called dreams and all that stuff
play the xyy man soundtrack
play me the greatest doctor fink song on zvooq
rate the current novel 3 points 
add kaya newest track to my i love my  00 s r&b playlist
please pull up nothing feels good
what will the weather be within the same area in minnesota on june 27th  2023
book a table for nine people at a brasserie on jan  16  2034
give the pirates of manhattan a 1
play me an eighties song by wes dakus
find invisible child at southern theatres
what is the weather at my current location
i want to put roberto valverde into my ultra metal list
at thirteen o clock book a table for margie and i in vanuatu
what is the forecast for tschetter colony on ascension day in oregon
play bebob on iheart
find the video game thale
where can i see the trailer for phineas redux
give 4 star for this album
find the photographic journal 
show creativity in ah
find a game called gladiators australian series 1
what movie schedules start at sunset
book a spot for nona gray  myrtle and alison at a top-rated brasserie that is distant from wilson av on nov  the 4th  2030 that serves ouzeri
find a movie house for kickboxer 5 – redemption
i d rate the rise of the west a 2 of 6 stars
add this tune by shagrath to black sabbath the ozzy years
find the return to grace saga
rate beyond the shadows 3 of 6 stars
add halley to this is tchaikovsky 
what s the weather forecast for east berlin  al
play anweshaa by the new first 
put joseph utsler on all out 70s
give zero out of 6 points to marxism and the oppression of women
book a restaurant with parking for kirsten morris and i 
listen to music from 1975
rate mimi and the biscuit factory 5 out of 6
can you rate this current essay with zero stars
rate the bourne deception 4 of 6
what s the weather forecast for new zealand
find merry arizona 97: desert stars shine at christmas
the current rating of 6 out of two for a textbook
add this artist named cleopatra stratan to my playlist named 30 before 20 masterworks by teenagers
book john pearson soda works restaurant on 7/27/2036
i need a table at a restaurant serving carne pizzaiola for tamra davis  viola and dorothea
add joan wasser to running playlist
show freezing forcast now within the same area in north dakota
find a pet of the cairo zoo 
showtimes for butterfly on a wheel 
the naked and the dead was pretty good  i d give it four stars 
play techno music
add i pledge allegiance to the grind to my sinfonía hipster playlist
what time are movies showing at megaplex theatres
play no more sorrow
i give the carry me down chronicle three of 6 points
will it get hotter in the city of ashford
find long hello and short goodbye  a movie
i m trying to find annunciation 
warren island state park distant weather forecast for 11 am
play my hype playlist on youtube 
can you add something by the artist paul cargnello to my chill tracks playlist
find becoming royston
book cornelia and bettie a table at a brasserie restaurant in colombia
when is sea of fear being shown at the closest movie theatre
i d like to see the album heroes of might and magic iv
open itunes and play kenny cox most popular concerto
rate this series 1 out of 6
add falling stars to my intense studying
rate this essay 1 stars
i want to see love  speed and thrills at the nearest cinema
i want to watch the television show symphony for solo piano
find a painting called the wipers times
tell me the weather forecast one year from now in kulpsville  togo
book me and my grandparents a restaurant in saint helens south dakota
i d like to watch films in 23 hours in the neighborhood
play midnight special
find the black girl in search of god trailer
put framed onto my ntc studio sounds playlist
can you add something from method man to my this is mozart playlist 
add song to daily lift playlist
what is the films with movie times in the area
will it get colder in cape fair
will it get chilly 1 minute from now in carterville
add this tune by frankie laine to my playlist kitchen swagger
play shaina magdayao s music on iheart
book reservations at a restaurant in niue for me  edna and glenda
i need a table for 3 at david whitney house in brazil
i want to hear a full album on youtube by jem godfrey
book a table for a macedonia restaurant
find the best man holiday saga
search for the long dark
play some tango on iheart
put before the eulogy onto acoustic blues
what are the movie times for movies around here
search for the song banquet for the damned
find a movie schedule in the neighborhood for animated movies
need a table somewhere in mclaurin connecticut
what animated movies are playing at kb theatres
what animated movies are at the nearest cinema
show me the schedule of movie times in dipson theatres
please search thirayum theeravum video game 
need a table for nine in east prairie la
play kim wilde by mike scott on slacker
play music off the track child maurice
put the airi suzuki album into my nuclear blast novelties playlist
play my hardstyle  baby playlist on netflix
find a picture called every little thing she does is magic 
add as i was going to st ives to the fantasía playlist  
show the drive of life album
is tomorrow at dawn at harkins theatres
rate the parable of the sower a 2 out of 6
show creativity in call me joe
play my piano ballads playlist 
i d like to hear chant songs from nineties
i d rate this essay 1 out of 6
add hemanta kumar mukhopadhyay album in funky jams
play the game sugarfoot
play women of jazz
i want to give nautch girls of india four out of 6 points
put ron wood in the digster reggae playlist 
add track to my playlist a sudden rainstorm
where can i buy the soundtrack bridge of souls
add this eric weissberg song to my dance workout
and a body to remember with gets a full 5 stars 
can you get the tv show  enter the matrix
add olga souza to virginia s femme fatale playlist
add this john tesh tune to the friendesemana playlist
add lee seung gi to my baila reggaeton playlist
find movie times for animated movies in the area 
what does for all the wrong reasons look like
i need a table for 10 at thomas hynes house nineteen minutes from now
i need a table in tn that s not to far for a party of ten
play a melody by adassa from the twenties
rate the following novel one of 6
is green grass widows playing at the cinema
how cold is it in my current position
i want to add this so chan whee tune to latin alternative music
please rate this textbook five stars out of 6
the next album is only one stars
what is the weather in pendleton center
add paulinho da viola to my radio rock song list
give 0 points to the hand in the glove
give 0 to the sky village
book a restaurant in lake fenton for four 
what s the weather going to be like in pr at nineteen o clock
play eddie meduza from the thirties
what s the weather going to be one hour from now in taiwan
will it be freezing nearby thap lan national park at 4 pm
book a reservation for a restaurant serving wontons for ten people in leopold
book a restaurant in kamrar for midday 
what will the weather be like in three weeks faraway in sompio strict nature reserve
i d like to watch movies around here  can i see the movie schedules
what movies are showing at fox theatres at 11 am
what movie times start in 22 seconds at magic johnson theatres
find kerasotes theatres movie schedules
what is the weather forecast in the country of chile fifteen hours from now
find a painting called the legend of tashan dorrsett 
rate until i find you four points
weather near california
book main deli steak house on february 13 in serbia and montenegro
book a restaurant in al at oak ridge
what is the weather like in detroit lakes
what movies are playing in the neighborhood
i give the part of the chronicle growth fetish four out of 6 stars 
add eef barzelay to the trad folk playlist  
rate current novel two stars
book a reservation for 1 on march 17
play my pandora app
rate the current essay 0 of 6
book me a restaurant reservation in madagascar
i give the chronicle atop an underwood: early stories and other writings a rating value of 3 and a best rating of 6
play music from the sixties
where and at what time can i see paragraphe 78
rate the lotus and the storm zero of 6
what s the forecast for pipe spring national monument
what films are playing at marcus corporation
play the late night jazz soundtrack on zvooq 
when is the next episode of the tv series crossing lines showing
will it be snowy in the current place
what movie theatre is playing the missing picture
play the most popular music from nat stuckey on itunes 
what s the weather in 10 months in nam kading national protected area
move el viaje de copperpot into my emily dickinson playlist
what will the weather be in one minute in tanzania
rate this album a five
is it nice now in madawaska
want to add this nick mason tune to the sylvia plath playlist
will it be snowy at the current position by march 3
how far from quebeck will it be hot
courtney and ruby want to eat at a restaurant three years from now
find the movie schedules
find a movie theatre with beware of bachelors
rate the current essay a three points
will it be freezing at 1 am in balko
i d like to see apartment hunting 
book a restaurant reservation in hong kong
give zero rating to the deed of paksenarrion
play me a fifties song by chingy
search for a painting of the wannadies
give three stars to chronicle falling in love with hominids
i want the nearest movie house with the debtors
add the artist to my this is mozart playlist 
add this tune to my indie reflection playlist
book a restaurant in french southern territories on dec  the fifth  2026 for two
she me the game called knowledge and decisions
what are the current movie schedules for amc theatres
play music by fidel nadal sorted by newest 
show a movie schedule with bow tie cinemas
find sappho
rate the current album a four
book a table at a faraway brasserie in nj 
give this essay a rating of 5 
weather for frankfort
forecast for wisconsin at 10 pm 
play some retro music 
play closer to the sun album
book a table at the wwe the world in south korea 
charlene and i and are are in liechtenstein and want restaurant reservations at midnight 
find bump off lover
give 0 points to the eudaemonic pie
find alamo drafthouse cinema with animated movies
what s the closest movie house showing the legend of ben hall
what is the storm forecast in the same area of honduras
how s the weather in brookdale zimbabwe
what are the movie schedules for movies showing in the neighbourhood
i want to listen to some music from 2003 on pandora from them
add luiza possi to my bachelor party playlist  
give heartland chronicle four points
show tv show schedule archive is
play a ballad by owen pallett from the seventies on slacker 
open up music on last fm 
add a song to my playlist impulso creativo
can you pull up a movie schedule for me
what is the weather going to be like in twenty three minutes in parksdale  in
will there be a fog here this week
i want to book a restaurant next year in glazier for 6 people 
when is good will evil playing at loews cineplex entertainment
add iene miene mutte to women of r&b playlist
play a sound track by vegard sverre tveitan
add the rebirth of kirk franklin to the fiesta playlist 
find the show manthan
show cloud forcast in 1 hour in ia
i need a reservation for a brasserie place for a party of two
rate the road to reality: a complete guide to the laws of the universe two points
is fighting with buffalo bill playing at the closest movie house
play within you without you by distance on zvooq 
book a brasserie restaurant at 18:28 and order wings 
get me a table for sonya  rebekah and i at a restaurant in latvia 
add this album to my playlist titled underground hits
find the schedule for screen souvenirs at cinemark theatres 
what will the weather be in the flight park state recreation area
add godmusic to my latin dance cardio playlist
will there be a lot of sun in dry prong somalia at 5 pm
i am giving paedophilia: the radical case a rating of 2 out of 6 points
i want to book dinner by heston blumenthal in al 
i want to hear some boris grebenchtchikov on zvooq
give a kentucky cardinal four points
book a table in arizona serving italian-american cuisine in a tavern for 2
what s the forecast for east sonora qatar
i liked ports of call  i d give it a 5 out of 6 
play some alte kameraden music
book a table 1 year from now for corinne  tisha and i at a restaurant in guernsey that is top-rated
is it humid in otsego réunion
play adieu by al arsenault
show me the forecast for wisconsin
what s the weather in close by my current position
add francesco de gregori to my classical new releases spotify picks playlist
is it going to be freezing in one hour in puerto rico
need a jewish in maine to book a restaurant
please look up the painting beyond iconic: photographer dennis stock 
play the tv series effortless regurgitation of bright red blood
will it be chilly around oregonia in 9 months 
book a table at a tea house in 21 hours in northern mariana islands
is it hotter in vernon
play me a nineties ep
add please  please  please  let me get what i want to my crate diggers anonymous
i need to know is it freezing in mn at 01:27 pm
show chocolate rain creativity
play good classified songs on vimeo
i need a table at a cafeteria for a party of 6 in al
can you add some tommie sunshine to my chill out playlist
what is the movie schedule today at neighborhood cinema group
book a restaurant in macedonia for 13 hours from now
rate the current novel five out of 6 stars
what will the weather be in montevallo on july ninth  2018
book a reservation for a restaurant in stonewood  gu
for the playlist running power add the name the best is yet to come
find a movie called single collection: hotchpotch
add tune to infinite indie folk
add another tune to my soft rock  playlist  
add artist post metal to playlist
play classic rock on groove shark
play me the dinner playlist
let me get the forecast for tea time in el salvador 
what time is utamaro and his five women showing at alamo drafthouse cinema
what is on the movie schedule for four am at landmark theatres
play music from the playlist late night jazz
put the bill berry track on elrow guest list
i m looking for a table of eight at the alley 
i want to see the trailer for no one
what time is soul surfer playing
show movie times now
i would rate the best science fiction stories and novels: ninth series 5 points
what is the weather forecast in saint vincent and the grenadines
add something by ritchie valens to my playlist virales de siempre
i give rogue ship 5 out of 6 
give the plague a 0
show movie times of movies in the neighbourhood
what is the movie schedule for films in the neighbourhood
add cleo laine to psychedelic rock
some me a healthy picture
add the singer barbara to my country radio playlists
i want to rate the selected letters of h  p  lovecraft i saga 3 stars
can i get the movie schedules for speakeasy theaters
show movie schedules of film nearby
book a table in fleetwood at a nearby deli
add share the well to my epic wall of sound
what film is playing in the neighbourhood
put ares in my canadian country playlist
play tuomas holopainen s the 21 project 
add d flame to the dcode2016 playlist 
add sara carter to my nothing but a party r&b
put this tripp eisen song on canta en la ducha
what is the forecast in bearmouth in virgin islands in 3 months 
book me a restaurant for 4 members at beaman federated states of micronesia in one minute 
rate the masks of time zero of 6 stars
what s the weather next week in somis
add us placers to my new boots
rate star wars - the old republic: revan 1 points
book reservations to a cafeteria in brockway colorado that serves thai food for six people
book the gus stevens seafood restaurant & buccaneer lounge in papua new guinea for one person 
play hora din moldova by yamazaki maso
put some stu phillips in the women of acoustic playlist  
restaurant in south sudan for 6
put frank farian on lydia s playlist called the black power mixtape 1967 to 1975
is there any fog warning in dauset trails nature center now
i am giving the current novel a four out of 6 rating 
put more unbelievable in my grandes unplugged playlist  
there can i find the beggar maid playing
rate this album 3 out of 6
add the tune from leena peisa to my amor amor playlist 
what time is the count playing
get me kiss the crystal flake
find the movie schedules for nearby movies 
play my 70s smash hits playlist 
what is the weather of ludowici at 4 am
book a reservation for ten at a restaurant in american samoa at 2 am
show the lateness of the hour
what will the the weather be like close to bailey s crossroads at 05:00:34 am
rate covering: the hidden assault on our civil rights 1 point
add shame on you to my masters of metal playlist
which animated movies are showing close by
please check the movie schedule 
find movie times
what time is movies playing around here
add this artist to my the road to punk rock playlist
what movies are on the movie schedules for five hours from now in the neighbourhood
what will the humidity be in ar in 49 weeks and a half from now
will it be freezing in seven minutes in nora fiji
add nana kitade to my modern psychedelia playlist
what s the forecast in klamath marsh national wildlife refuge
rate cousin bette 5 points
play a nineties tune by sugar minott on netflix
to johnnie s funtime activity playlist add the name the best of guitar shorty
where can i watch the tv series polite people
look up the television show called monster mash
rate the current album 5 out of 6 points
what is the weather in current location on december the 23rd  2027
list films at pacific theatres
book a table at a tavern in albania for annette  darlene and barbara james for ten am
show me movie times
put this track on my infinite indie folk playlist
put dschiwan gasparjan into the cool down playlist  
i d like to see the saga 12 soulful nights of christmas
show the creativity of ghost dragon of cold mountain
i think this novel only deserves 2 points out of 6 
book me a table at a tartinery restaurant not far from my home in elk rapids 
check movie schedules and find which animated movies are being aired in the neighborhood movie halls 
play shara worden
place raise your fist onto year in metal 2016 
give four stars to current novel
look up the reverse of the medal
will it be colder in delaware
the complex: how the military invades our everyday lives has a best rating of 6 stars but i will give it zero
will it be warm neighboring here in whitehouse
rate the book strumpet city zero for 6
is it freezing this evening in maunabo united states
play the newest stuff by blowfly
play some twenties theme music on google music 
what are the local movie times
give me weather information for porcupine mountains
find the schedule for movies at the megaplex theatres 
i want to eat close by east brady for seven  people
play some twenties music on iheart
please find me the movies playing nearby
play the newest martin solveig sound track
i would say this essay deserves four points
book a table at a bar in cambodia that serves cheese fries 
the following essay is worth four out 6
what is the current temperature here
give it a 0 for this essay
add i roy to my this is rosana playlist
what will the weather be in east new market antarctica
please tell me the forecast for guinea-bissau
play eternally by marko desantis on zvooq 
the stars for this are 4 for a textbook
i give four stars to this chronicle 
what is the midday weather forecast for chalkyitsik  palestine
i give 3 of 6 stars for the current textbook
i d like a table for natasha  bettye and kimberley at a coffeehouse with a smoking room
book me seating at a popular joint for sep  the 10th
book an oyster bar in american samoa for lunch
give 0 out od 6 stars to mystery of the desert giant
please play good music by will oldham 
find plitt theatres movie schedules
for the playlist wild & free workout add tsidii le loka
give me the forecast for the weather in citrus springs
rate this textbook 5 stars
find me the picture the id
i would give the against his-story  against leviathan saga a value of one
is it cloudy in tingley
book a nearby northeast indian restaurant in north carolina for ten people at six am 
rate this series one stars
i m looking for sherlock holmes contre arsène lupin 
book this week for their step sister s workplace close
where can i watch wartime romance in the morning
what s the weather like in big delta
what films are playing now at the general cinema corporation
where can i find the saga addicted to love
table for nine at an internet pub
what is the weather of nebraska
is it chilly in fm
what kind of weather is forecast around seven pm here
i need a table at a restaurant in ireland serving kouglof
i would rate this album 1 points
put this tune on my your favorite coffeehouse playlist
rate the current novel 1
make a reservation for eunice thompson and elisa martin in the virgin islands in one minute 
play the last 1954 ep by povel ramel 
find a tv series called dirty politics 
play the most popular 1956 record 
show tv show schedule of offroad legends
look for the thorns saga
what will the weather be in uzbekistan at 4 am
will there be a lot of cloud activity next summer in nellieburg  arkansas
what is the weather like in great bay national wildlife refuge
napoleon xiv should be added to sharlene s playlist transatlantic lullaby
add eric bibb to country coffeehouse
book the labworth café in ethiopia for six people 
tell me the weather forecast for eight am in reminderville  fl
rate dixie lullaby: a story of music  race and new beginnings in a new south five out of 6 points
which day this week will it get chilly in palmetto  in
are any films play at the santikos theatres
book a spa in pizzeria on november 24  2036
book a gibassier serving tavern in vermont for nine
how will the weather be in kentucky this week
a writing kind of day deserves three points and a best rating of 6
find a reservation in deweese for my sister and i
book me a reestaurant that is close in the country of cocos islands
add this nozomi tsuji tune to my hot house playlist
book a table in fairview neighboring the area
i m looking for a photograph called merry christmas 
rate the current essay a three
find kerasotes theatres showing animated movies
play some music on last fm
i need to book a restaurant at four o clock for 4
book at table at a brasserie which serves padangnese food 
need a table for sep  first in haiti for a party of three
can i see the boat people
what is the movie schedule for train
weather for faroe islands
i gave the current album two stars
what is the 00:00 pm forecast for blizzard conditions in cameroon
where is the closest cinema playing soapsuds and sapheads
play some music by karl blau 
use itunes to play artist ringo shiina track in heaven
will it get warmer in centenary around the evening
play i could write a book
tell me when there will be a snowstorm in clifton forge
add track to indie electronics playlist
i want to hear a top-20 chant from the twenties
play 1958 music
give 1 star to the cure for death by lightning
play the newest 2016 ep from boaz mauda 
play the playlist grime shutdown
rate the book joyful noise: poems for two voices 3 points
play my éxitos españa playlist
give one out of 6 points to the psychopathic god series
play music from 2016 
rate who moved my cheese a one
this series should get 0 of 6 points
book a pub with fisn n chips in timberville 
play the best vanessa peters songs
is it going to get colder at my current location by 10 am
add paul young to my retrovisor
find outback bound  a trailer
can you help me find preaching to the perverted
book a restaurant with wifi for nine people 
add this album to holly s bandas sonoras playlist
i am giving this current novel 1 out of 6 stars
find a soundtrack called tied to a star 
what time is american gun playing
play fight on  state 
put this track on musica española 2017
i want to book a restaurant in botswana for four people 
i d like to watch sherlock holmes à new york at kb theatres
will it be hotter in san valley landscape park on june 24  2024
is it humid in charenton
show movie schedules for animated movies in the neighbourhood
open netflix and play kan man gifta sig i jeans
find the good girl at a movie house
look for the district 9 novel
is the wandering detective: black wind in the harbor playing at cinemark theatres
what is the forecast for the wildreservaat ithala in the distant future will it be colder
what is the weather in forêt nationale davy crockett today
add shahrum kashani to my country hits
where to get album justified
tell me the movie schedules
play the top-five ballad sort from 2004
put say it ain’t so into my trap land playlist  
play some twenties movement tunes from the last olga souza
find the schedule for films at century theatres 
rate cold light 5 out of 6 points 
will it be warm in chicamocha national park
find the schedule for the devil diamond at a movie theatre 
find goodreader 
book a hawaiian diner in south carolina not far away in 1 second from now 
book north indian osteria at 12 am
i d like to add the artist jesper kyd onto my fresh electronic playlist 
i d like to eat at a restaurant far from grantsburg
can i get the showtimes for films in the area 
she me the movie times
add bien acompañado to all out 60s
is it supposed to be chilly in kuwait
i want to listen to an album sorted by last  open google music and play paulinho da viola 
what s the weather forecast for togo on april the 24th
where can i purchase wuthering heights
include kunnon syy in my trap land playlist  
what is the forecast for sanilac petroglyphs historic state park
what are the time for movies playing at star theatres
give this current novel a three
i rate monster mythology 3 points 
add ashley mcisaac to my r&b party classics playlist
show me the television show operation thunderbolt
please get seating at bouchon in tonga for jimmie and chasity howard
play something from 1981
is it going to be humid in helix
tell me the weather forecast for murone kōgen prefectural natural park at elevenses
give two out of 6 to current book
add crying  waiting  hoping to my weekly buzz playlist  
play music from the playlist get your mind right
what type of movie  is houston press
play dj kentaro from the year 1994
play doctor fink if i could choose
book a table at a top-rated brasserie in pakistan
whats the movie schedules for general cinema corporation
i d like to listen to tom cochrane s 1990 ep on zvooq 
play some 2011 chant music  new first  by shaggy 
find a consolidated theatres showing the good old naughty days
this chronicle gets a three out of 6 
is tarzan of the apes playing at cobb theatres
the battle for skies gets a three
what movie theatre is showing manorama six feet under
play the top five melody from 2000
play some music on vimeo 
find me a table at a delicatessen in urbanette that serves rabbit pie
find a show called last night on earth 
play pandora
is and the ship sails on playing at douglas theatre company 1 minute from now
give three points out of 6 to one hundred poems of tukaram
book an osteria in north salt lake for three
movie schedules for animated movies playing in the neighbourhood
what is the random lake forecast for hot temps
please put the album onto fresh folk 
add od mene se odvikavaj to my laundry
play rain by subliminal on groove shark
i d like to eat at a top-rated restaurant in turks and caicos islands
start up my nostalgic playlist  
what kind of films are at the closest movie house
tell me the weather forecast for lecanto  georgia
what s the closest movie house showing the hard way
i want to see the maximum trance picture
rate the removers 4 out of 6
what time is doc savage: the man of bronze playing
book a table for one at monty’s hotel  secunderabad
please play me jerry lee lewis s if you say so track 
rate political liberalism 1 out 6 stars
which movies are showing at southern theatres
rate the book magic: history  theory and practice five stars
give 5 stars to this book
put this album on my road trip playlist
play kisaki on pandora
add alexia to women of classical
where can i see the television show  jimmy two-shoes
book a spot for 2 at a restaurant in mayotte at 06:13 am
book a table at a french restaurant for fern and i
is it freezing at jasmund national park
i wish to enjoy some fifties music by johnny paycheck 
is there snow in jan  in castle dale mayotte
where can i get harry potter and the philosopher’s stone
play the last ep from 1999
what is the weather forecast for strong city
rate this novel a 3
restaurant in zimbabwe that is brasserie and has parking
find the movie chaos is me
restaurant in durant for 3 pm
is it chilly in nightmute
find movies with movie schedules in the neighborhood
rate the current book 3 of 6
rate the current album 4 out of 6 stars
where can i watch the television show the private affairs of bel ami
put al jarreau on the concentración playlist
book a table for 2 at a fm restaurant serving grits for the next meal 
what animated movies are playing nearby
add this track to the playlist hits of the 70s
tell me if it ll be chillier in 3 minutes here
find the video game the sims 3: generations
what is the nine am weather forecast for nationalpark midongy du sud
play some songs from the fifties
open the playlist from sergei chatschatrjan
show the phish: live in vegas tv series
is agnew united states has chilly weather
add maschi e altri to my this is john williams
i want to book a restaurant for four people in eminence 
add jon mclaughlin to my forever country playlist  
show the innocent when you dream saga
i think that this chronicle should have a best rating of 6 and a value of one
play music from 1958
what is the weather forecast for friona
what are some movies playing in the neighbourhood
find close by movies movie times
will the weather be stormy on january the 15th  2026 in the federated states of micronesia
contemporary religious satanism gets a 3 rating  
what is the weather forecast close-by bermuda
i think that this essay deserves four stars
check the forecast for fernwood  mt 
i am giving this current album a rating of four out of 6 points
show me movie times for one minute from now
i would like to book a brasserie for nine in ar
how much rain in montana 12 months from now
find a reservation for 2 at a restaurant for pizza
book a restaurant that serves scampi for 10 people 
can i get the marine 2 showtimes 
play the top-5 songs from paddy reilly on zvooq
show movie schedule and movies in the area
what s the weather in singapore
is it humid in caddo mills  ky
what s the cloud forecast now for sierra leone
give 1 star to this album
what is the movie schedules for the movies nearby playing 23 seconds from now
put this artist onto the chillin  on a dirt road playlist 
play a top symphony from the fourties
add michael wittig to the party playlist  
weather on croatan national forest on jan  21
add joe mcphee to my picnic in the park play list
play the aviation cocktail album
add perfect sense  part i to my women of classical list
book a table for pearl and verna slated ash wednesday in gabon 
my rating for some doves and pythons is four
add the track by josh kear to myra s playlist with the name highway 61
i want to book a restaurant neighboring livonia av
play some annie herring beat street on itunes
play step up your game by marc cohn 
add this tune to my road trip playlist
add hatfield and the north to my hot house playlist  
my niece and i want to visit a food court in callicoon  tennessee
play the eternal by juju mob on vimeo 
rate current book two points
read the black-body theory and the quantum discontinuity novel
where is my dearest enemy playing
i want to hear song for adam
i give the aquariums of pyongyang 3 out of 6 stars
can you put a song from tom jones on my electronica & dance playlist
is it going to be temperate in farallon islands now
find a world apart 
play some king tubby from the eighties
find me the showtimes for until death at the nearest movie house 
the road trip playlist needs justin utley in it  
add iemand als jij to my playlist named in the name of blues
i want to hear sia furler s popular songs on last fm
what is the movie schedule for movies in the neighborhood
what s the weather here at three pm
what time is class playing at amco entertainment
put this frederick knight track on my the midnight hour playlist
use deezer to play music
what is the forecast in mer rouge and palestine
find a reservation for three in ansonia mi
gie this textbook 3 stars
find the painting icac investigators 2014
will the weather be warm in the nationaal park band-e amir at twelve am
are there any films around here
play me a song by linn berggren from spotify
find me the book my people were fair and had sky in their hair… but now they’re content to wear stars on their brows
looking for the painting last flight to abuja
find films available at cooper foundation
find me a game called spaceball
will it be hot in dongola cameroon
add artist hex hector to my old school death metal playlist
book a table for two at a restaurant faraway from office in california 
search for tv show live at apollo
play solange 2016 album 
add yameen to the uncharted 4 nathan drake playlist
rate the ultimate revelations saga four
which cinemark theatres is playing a is for atom
rate and no more shall we part chronicle 4
add zombieland to noctámbulo playlist
i d like to watch the slender thread at 6 pm
check the movie schedules 
where can i purchase paradise tonight online
rate mouse noses on toast 5 points out of 6
book a spot at the best steakhouse in florida
play yuauea by rick ross
add don and sherri to the electrosafari playlist 
put kan mikami on pre-party r&b jams
search for pat and margaret
will there be cloud coverage at zero am in minami alps koma prefectural natural park
help me find the book called journal of neuroscience research
give the current album a 1
will there be hail in dean creek wildlife area on feb  25  2031
i want to give this book three out of 6 stars
play pride of the prairie from johnny burke
i need a table at a cafe that serves baeckeoffe
add darkest angels to my sos 48 2016
check the weather for kenedy  vanuatu for around nine am
play bitch please ii from julee cruise on iheart
give 4 out of 6 stars to this textbook
find karol: the pope
find sweet sensation
play addicted to you by hank ballard
book a restaurant for five in karnataka
on oct  26  i will need to make reservations to eat in halibut point state park 
book me a reservation at a pub restaurant that serves meatball in stehekin for 2 people on 1/1/2018
play a track from 1959 
find secret command 
play me a song from luxury liner
add another song to my this is status quo playlist  
make a reservation at a diner which serves chowder in mt for august the 17th  2024 
show me the television show the angry mob 
what is the bethany beach forecast
what s the weather in burns
what s the weather in guatemala
rate this essay 4 of 6 stars
find pursuit of radical rhapsody
what time is bordertown trail showing
i m looking to get reservations for me  jillian and louella at a restaurant that is faraway from tx 
find the madwoman in the attic 
what animated movies are playing at the nearest movie theatre
book a highly rated place for 8 at a restaurant
play a jim mullen ep from the sixties
rate the book a brief history of chinese fiction 0 out of 6 points
rate opération sweet tooth 2 points
book a spot for ten at a restaurant with a spa in u s  minor outlying islands
can i get a table for 3 in gu at a restaurant in the neighboring area that serves chicken french
play the new music from wilko johnson
add this album to trotamundos
add this song to my indie acoustic playlist
rate this book 3 stars
play neutrons  by seun kuti
will there be depression on mar  the twenty-eighth in saint pierre and miquelon
add this album to jenifer s mellow dinner playlist
is it going to be rainy here one second from now
show the collectors video game
what is the forecast for cloudy weather here
look up the collection volume one novel
rate this book titled the gray prince 5 points
add track to my playslist this is los fabulosos cadillacs
find american psychologist  a game
what is the movie schedule
rate winnie-the-pooh four out of 6
find family feud novel
find the video game tenacious d in: the pick of destiny
i give the screaming staircase a five 
put robbie robertson into my chill out playlist  
what is the forecast in texas
is it going to be hotter within walking distance of ohio on 3/22/2038
i need to know if its humid in greenback in mongolia
put horace silver and the jazz messengers on my running to rock 170 to 190 bpm playlist
give me showtimes for the tenth woman at the movie house 
is it cold in brian head
please find the work titled talking to heaven
can you add a song by bill frisell to my top latin alternative playlist
tell me the movie schedules for loews cineplex entertainment
when is blood and ice cream-trilogie playing at the nearest movie theatre
find the exile and the kingdom
add artist to my 80 s party
book a table in ut at kearney for 6
add big bill broonzy to my impulso creativo
what s the weather like today in sierra blanca
i am giving dead souls a five rating
play some rock & roll by deezer 
rate scarecrow and the army of thieves a three
i need a table for 10 at the best gastropub
show movie times for animated movies nearby
play the top-20 music by merz
use pandora to play music from stano in the year 2005
i want to hear theme songs from zeebra from the sixties on slacker
find me a game called thesis eleven
give zero stars to book of artifacts
what animated movies are showing at star theatres
where can i purchase a copy of the painting called glimpses of world history
what will the humidity be like in vi on june the fourteenth  2020
reserve a spot at indoor restaurant on june the 15th  3 guests
i need a reservation for a restaurant that serves cupcakes in oh
is there a blizzard coming to north bonneville  oh around 10 o clock
i m wondering if i can watch heyy babyy at a cinema 
book french food for me and angeline at a restaurant
where theater is playing the ranger and the lady at 10 am
play the song vodka by kunal ganjawala on itunes
add de principii evangelikum to my domingo indie palylist
rate the current chronicle a five
find a song called magic in the water 
rate this album 2 stars
play the soundtrack for back to the future
what is the 7 day for cheat canyon wildlife management area
add some beatmaster v to the this is nicky jam playlist  
ad czarna dziewczyna to instrumental madness playlist
find the movie schedule for arclight hollywood 
i want to book a close restaurant in sc for seven
where is white bim black ear
what animated movies are showing at loews cineplex
what films are showing at kerasotes theatres
find me the show the skull 
showtimes for movies currently playing at speakeasy theaters
can you play a top 5 song by manos hadjidakis
give 2 points to khaled: a tale of arabia
show me the movie times for films nearby 
add album to my party with friends
find movie times 
rebekah taylor and marcie need reservations at the clink in senegal 
is it humid in my current spot
find a tv show called the extraordinary 
give the saga called the bridges of madison county four of 6 stars 
look up the fair warning saga
what will the weather be nineteen seconds from now from the little manatee river state park
play the track pocahontas john farnham
i want to eat at a food truck this week with my colleague and i
contemporary religious satanism gets a rating of 3  
book a table at top pot doughnuts in 16 hours for 5
show me the saga the buffalo boy
show me the photograph called hola mary lou: prom night ii 
book tortano serving brasserie for me  isabella and carly in kuwait
what s the weather forecast for north wolcott  alabama on october 12  2032
please anything good by chieko ochi
play an eighties song by ler lalonde
i want tables for 6 at a kosher steakhouse around kosovo
which films are playing in the neighborhood one second from now
what time will the amco entertainment  be plying the teeth of the tiger
play the rest of my life
find me recorder and randsell
find a movie theatre with animated movies that is closest to me
whats the weather in blythewood louisiana
show the movie schedule for 9 pm  at cobb theatres
award a rating of 2 stars out of 6 to confessions of an economic hit man
when does fire and ice: the winter war of finland and russia television show air
what is the forecast for dec  1st  2036 in keeneland
book a table for eight in graf far away
tell me the movie schedules for mann theatres
restaurant in watauga for me and my aunt
i need to reserve a table for me and my mom at the nearest restaurant in the state of mh 
i d like the movie schedules nearby me for animated movies
i need a table at a steakhouse in encino that serves meatcake
put kids of the black hole onto my 90s por siempre playlist
this album is five stars 
i want to hear nokko s songs from the twenties
give the current book a one out of 6 
the bone season is worth at least three points
book a bar which serves chicken french at robinson 
what is the weather in galena park oklahoma
play a symphony from the thirties 
play some soul music
what films and movie schedule are in the area
i want to play music off deezer
will it be cold here in one hour
what is the weather forecast for midnight in dc
will it get chillier in sinclair in 8 hours 
find a trailer called no reservations 
play the seamus heaney collected poems song
play hanging out and relaxing
i rate naked in death a 5
play netflix tunes from 2003 on an album
play the knockabout soundtrack
what is the movie schedule looking like
please play jim martin on vimeo 
find a cinema showing the mandrake nearest at one o clock
play something from 1985 by billy werner
rate the abyss of wonders 4 out of 6 
rate this book series zero out of 6 points
book a table at crown candy kitchen for lacy and i
add this track by flesh n bone to cherry s spa treatment playlist 
add track to todo latino
play me the trailer for star control 
i give the monkey and the tiger a rating of 2 points 
in california will it be cold in east trenton heights
rate this album two out of 6 stars
find a tv show called randy scouse git
give four out of 6 stars to this textbook
i give the following album a zero 
give me the movie times at goodrich quality theaters 
rate this book titled sombrero fallout: a japanese novel 0 points
what is the weather like at basaseachic falls national park
put this album on my playlist titled dance hits
please rate the lightning of august five points 
give two star to current textbook
show movie schedule at cinemark theatres
show the forecast for tanintharyi nature reserve
what will the weather be 1 minute from now in garrochales
pull up the book live and unreleased: the radio show
give me the weather forecast in pleasant dale  alaska starting in 19:52
show creative soundtrack pitch black brigade
find the youth against christ saga
book a reservation for a brasserie serving soupe in tokelau
rate seven pillars of wisdom two points
what s the weather going to be like at 10:21:20 close by id
rate the current series a zero
is it supposed to be hotter today in il
find the tv series treeful of starling
rate the current book one of 6 points
add album to all out 00s
is it going to be hotter in d lo
where is the nearest cinema that is playing films
rate the current album 2 stars
what are the movie schedules at the imax corporation
what is the forecast for colder conditions within the same area of this current place
add cordell mosson to my i love my neo soul list
add irish heartbeat to my trapeo playlist
i am rating this essay two points
can you give me the movie schedules for films close by
play some thrash metal 
rate the black coffee chronicle three out of 6 stars
book a cafeteria that serves bagels for six people 
what are the movie times at goodrich quality theaters
play some 1999 symphony from minami takahashi
i would like a table at a taverna with croquembouche for 1 minute from now
add madlib invazion to my prog rock monsters list
please search for sealed with a kiss movie 
whats the closest cinema that shows movies at 12 a m 
book a restaurant in darnell 
rate this novel four points
i want to see the book  the mailroom: hollywood history from the bottom up
find out what films are playing at north american cinemas
i want to give gay male pornography: an issue of sex discrimination a 1 
find check in
is i was an american spy playing at 11 a m  at southern theatres
what will the weather be in totowa guernsey
find berlin to the samba beat
rate the current essay three of 6 points
i m looking to find the trailer for brought by the sea 
is the big job playing at the nearest cinema
what is the closest movie theatre showing in pursuit of honor
play music from art porter junior movie sound track using vimeo
add the song to my the funny thing about football is playlist
find animated movies in the area
can i hear tod ashley music from 1953
give my current book 4 stars 
what will the weather be like on august 1  2026 in maryland
play tribal
use google music to play some songs by dr john
show me the evil dead painting
ho warm is it in arcola
can you look up the galsoft linux tv series
where is my song goes forth playing
book me a table at the fat duck in ireland
add unreachable to my wine & dine playlist 
out of 6 give the morganville vampires a 1
please play anything by george formby jr
rate this textbook 5 out of 6
i want to hear some bill black chant music
book a highly rated northeast indian  brasserie in kenova for nannie and i at 14:41 
add country favorites willie nelson style to my playlist titled spinnin  records top 100
at two am  i need reservations for my friends and i at irma hotel 
show me the schedule of letters from a porcupine in alamo drafthouse cinema
i need a table at eddie’s attic in nevada for one
rate the secret of dr  honigberger 2 points out of 6
show the kindness of women picture
i would give political man zero stars
find the 180 
open youtube and play iron mountain depot from john lomax
please search for the live in san juan capistrano picture 
i want to hear jon sholle s stuff from 2009 on groove shark
which animated movies are playing at megaplex theatres at tea time
movie times at consolidated theatres
i d like to eat at a restaurant in md with a party of 8
find a painting called voices in my head 
find me the song called the budapest beacon 
find me a game called merle haggard presents his 30th album
for this current textbook i give 4 stars
find the picture of the harsh light of day
play some sixties music by gaudi on last fm
will there be snowfall in coxs mills vatican
give this book a 2 
what will the weather be here 14 minutes from now within walking distance
look for the trailer for red stallion in the rockies
play some sia furler on last fm
show me the forecast for the distant area of me at three pm
what s the weather forecast for central  north dakota
book a restaurant on next fall  for 5
check the weather forecast for pineridge 
this album is hot trash  it s totally zero stars 
play johnny gimble
add milas poli to my indie bluegrass
add this artist to disco fever playlist
want to see the dungeons & dragons: chronicles of mystara
play an album on netflix by chris castle from 2011
book a restaurant within the same area of earls court for lucille and marina 
i need a table at surf taco in east uniontown
play a tune by houston on spotify
add new wave blues to my push button funk playlist
i need a table at a restaurant in texas for kelley and suzette
will mondamin be hot on july 20  2021
will there be fog not far from mexico on apr  27
play a symphonic rock on pandora
what is the local movie schedule
has the tv series puppet master: axis of evil been cancelled
add billy eckstine to my emotron
play a song by electric tones from their kurutta taiyō album on last fm
i want to listen to nineties chant songs
reservea  table for five people on september second in gabon 
put jim fairchild onto spotlight spain 2016
need a table at colony in sri lanka next year
play some salsa music 
i need a reservation for a churrascaria in oneonta wyoming for a party of 4
play the last soundtrack from the sixties
give 1 out of 6 stars to current book
can ten green bottles be added to brooklyn beat
find the quest of iranon 
play keep their heads ringin’
play a song from my workout playlist on groove shark
i rate step by wicked step 1 stars
book a table in sterling run for two with a pool and food court
will it be hotter in conception junction  moldova
book a table for 6 at a top-rated restaurant in north amityville ma that serves south tyrolean food
i need a table for ten on april the eighteenth  2030
play going down to the river on pandora
i need a reservation for 3 hours from now with a party of nine in neighboring sweden
what s the forecast for missouri around elevenses
give this textbook four stars
what is the predicted weather for wells in indiana
add tune to my country playlist
please search for the work  wholehearted 
i give a rating of 4 out of 6 for the book my sister and i
find a show called big broadcast of 1938
play me an album by lunchbox
rate the rogue lawyer 4 out of 6
add munawar ali khan to my mujeres y hombres y fiesta
play the album sauna on zvooq
i want to add another album to the scratchy back porch blues playlist  
rate the current essay four out of 6 
i d like to add this tune to my spotify orchestra cello playlist
what is the forecast for mar  8th in friesland  tennessee
add waltz for debby to my soft pop hits playlist 
i d like to see the movie schedule for movies in the area
play the greatest from win stracke on groove shark 
what will the weather forecast be during the kent state shootings remembrance in el cocuy national park
i am looking for shoot me down
i d give the current essay five points
where does the return of the whistler play at the bow tie cinemas at 03:01:48 a m 
what is the movie schedule at douglas theatre company
find movie schedules in warren theatres
listen to tei movement from most popular eighties music
play music from the artist taktloss from the record in the thirties
what is the movie schedule
find movie schedules in the neighborhood for movies
rate the current book 5 of 6 points
find a tv show called the soultaker 
put pedro navaja onto my flamenco pa ti playlist 
what is the temperate in seattle heights and slovenia at seven pm 
play andrew lloyd webber s good tune on zvooq 
put this dave abbruzzese tune on family road trip
i give this book five stars out of 6
what time are films showing in the neighborhood
find me the documentary a winter of cyclists
is it cold in the current location more than it was in 3 years 
rate this novel a three
add this song to my this is kevin johansen
what s the weather like in calpella
make a reservation for four at a pub in sugarville 
find she monkeys
i d like to know the movie times for movies nearby me
i need to book a table at a tavern that serve gnocchi for nine in owenyo
want to play christina schollin lastfm
where can i view the photograph dinosaur from the deep
play some movement by dj spinna
rate the change 0 out of 6 points
i need a weather forecast for tallahassee-st  marks historic railroad state trail
play the greatest record by leroi moore
find the novel playlist: the very best of brad paisley
add song to kids workout
put this tune by mark norman on my keep calm list
rate voyage in the dark 3 of 6
add la woman to my soul lounge playlist  
book in romania for christian and susana at david carpenter house
add tsubasa imai to my another glass playlist
i want to add johnny burke to the country bound playlist
is it going to be freezing in mahwah missouri on december the fifth  2025
play groove shark
add this album to my throwback party playlist
repeat the track of music
add rise of the infidels to my bring back the 90s playlist
play a record from the seventies
where can i buy the movie the teahouse fire
what is the weather not far from current position
book a table for 10 at the dome  edinburgh
give five out of 6 stars to the arrows of hercules
find the movie schedule for animated movies in the area 
add song to my pure rock & roll
play shake your head
what s the weather close to harmar heights this afternoon
i want to book a seafood bakery in le roy 
which movie house is playing snow in the desert today
rate my current essay a 2
play morning song
book in ri for one in wabuska
play the song american patrol by lauryn hill
i need to add another track to my cleaning playlist  
play music by billy powell
tell me the weather forecast for mokena
is there a depression in solromar on december 7  2033
i give obama: from promise to power 6 points and a rating value of 1
show me the movie schedule
find movie schedules at goodrich quality theaters
play a symphony that is good from 2000
rate the michel strogoff saga four of 6
put this lidell townsell track on esenciales
rate lost empires of faerûn five of 6 stars
book a table for nine at canteen lunch in the alley at midnight
will it be nice in reager mp
help me the find the thug lordz trilogy book
what is a romance of the halifax disaster
rate peddling prosperity zero stars
what is the weather forecast for piqua on pearl harbor remembrance day
i want this artist on the cena elegante playlist
what is the forecast for swain
play me a song from the fourties movement
add bring back my daddy to me to my playlist named might and myth power metal
what time is wild and wooly playing
play the playlist feel good dinner 
add the unraveling to marina s playlist it s a southern thing
add the man who never lied to my current comedy top tracks
rate the current saga 4 of 6
play martha my dear by shannon 
find the schedule for movie times 
i am rating this book under the series section a three out of 6 stars
book a table at t-rex in one minute in osierfield
book a kuwait place at seven am at the middle east
play a wendy carlos song from 2002
put this song in the playlist trap land
do you know of a song by the mande studies association
what s the weather in wisconsin on national maritime day
add beijing huanying ni to my workday lounge playlist
i want to add this bon scott song to my post-grunge list
is it cold now in carlos  il
find the closest cinema for films
add the track to my playlist with the title showstopper being mary jane
give me the movie schedules for neighborhood cinema group
find national amusements with honey  i shrunk the kids
for the book the flash: stop motion i give a rating of 5 points
play music on itunes 
what will the weather be like in russia in one hour from now
pull up the trailer for 2000 years – the millennium concert
this current book deserves 3 points
i would give sixty lights chronicle a rating of five and a best rating of 6
the book dying  in other words deserves at least five points on a 6 point scale 
i want the video game southwest riders
please play some music from the seventies movement
what s the weather in lime ridge dc
i d like to watch health warning at the closest movie house
add vera to my 80 s jam session playlist
i want to hear the newest music from the railway children
i need a reservation for national coney island with a party of 8 in nv
find a show called time is just the same 
play spotify
rate the simplest words a four out of 6 
find the tv show titled timerider: the adventure of lyle swann
book a taverna in equatorial guinea this month for nine people 
rate animals of the bible one of 6 points
add francesco de gregori to gayle s women who dj playlist
play moustapha amar make it rain
play 1981 tunes by jiles perry richardson on lastfm for theme music
what time is in the crosswind playing at marcus corporation
add the song to the pure seduction playlists
will it be colder in oaklawn zambia
play taiwan is good by kotoko 
i need a reservation for 6 at cherwell boathouse 
what movies are playing at warren theatres
add paul wright album to 90s smash hits playlist
i m looking for a movie schedule at the cooper foundation 
show under the sea creative video game
give 5 rating for this textbook
what are the animated movies in the neighbourhood  for the recent movie times
open google music and play women of jazz playlist
show the my world 2 0 photograph
add this track to my road trip playlist
search for high chicago
where is the closest movie house that s playing the mark
play paula campbell music from 1993
book me a table for 2 in 6 years  at a restaurant that serves potée
book a table for now for 4 for an oyster bar
let me know the movie times for films in the area 
i would rate this current textbook four stars
please get me seating at the tavern in red lick  michigan
play a song by alasdair roberts from 1996
rate the current novel 5 of 6 points
book a manadonese restaurant for two
can i get the showtimes for films in the neighbourhood
find cover her face
book a theme restaurant in cameroon for 6 people 
where can i find the movie called cracking contraptions
will it rain in deersville
find the novel peace arch news
when was the soundtrack for those were the days – the best of leningrad cowboys published
play another time
i rate this textbook 0
i want to eat mezes at the pub for 1 at four pm
will it be cloudy one hour from now in my current position
i am giving fifty years a hunter and trapper a 1 rating 
what s the weather in the current place
tell me when it will be warmer in my current position
book a table at the top-rated taverna in north korea 
will it be colder in holladay saint kitts and nevis
rate this saga 1 points
book a reservation for a southern brazilian restaurant for 10 people within walking distance of broadway-lafayette st
i really need a top-rated restaurant that can seat 3 people in 1 minute from now 
tell me if it will be hotter in seven hours in doyle  united states
find movie schedules for movies around here at nineteen o clock 
add this song onto hip hop gaming playlist
give one out of 6 stars to the shiva option
can i get the movie schedule for 8 a m 
find the video game the tomb
rate this book 0 points out of 6
add that was only yesterday the last ep to my afternoon train ride playlist
give 4 out of 6 stars to current chronicle
find tv series titled sonata mix dwarf cosmos
play deezer top 20 by natasja
put this song on legendary guitar solos
rate this textbook 0 stars
add defined by struggle to chillin  on a dirt road to my playlist
rate tune to 90 s baby makers
what are the movie times for films playing in the area
what s the weather forecast for my current spot in eight hours
where can i find the photograph of a christmas memory
show nightcall
what is the weather forecast in six weeks in la
rate the always running series 0 points
book a taverna for 10 for ny
wish to find the work the immortals that is a show
add the artist ruby to my digging now list
play party through the decades on deezer
book a spot for 8 at a tavern on jun  the 11th  2034
rate adventures in stationery saga 5 stars
what s the weather going to be like in mi on august twenty-eighth  2033
rate a pelican at blandings a 2 
what will the weather be in the current spot on 12/14/2023 
is the ghost breakers playing at plitt theatres in two hours
i need a table at the middle east in mn for a party of 6
this current album deserve 0 points and a best rating of 6
me  maggie and ellen want to eat at lentil as anything
book san francisco brewing company for two located at al
play me a top 20 chant by ruwanga samath on lastfm
find the tv show starship titanic
what s the weather forecast for walsenburg  vermont for july 13th
add a track from the edge to my funk soul disco playlist
play robin hood rescuing three squires by bhupinder singh
look for the american journal of sociology
this winter  meredith  betty and erika want to food at a gastropub that is in the same area as fran s location 
movie schedule at cinemark theatres
looking for a black ribbon for deborah 
i need to book the fashion cafe for meal in lavina
i want the song phrazes for the young
can i hear the latest music from bahar kizil
where can i watch the picture i’ll take care of you
find a game called the life and loves of tschaikovsky 
will you play me the most popular sound track from 2006
locate a bakery in rockport  federated states of micronesia that serves olives
i want global top 50 to have marit bergman added to it 
what is the weather in richardson tanzania
what is the weather supposed to be like on sep  20 in maltby  russia
can i put indocumentado onto my folk music at the gaslight café playlist
add grey cloudy lies to the hip hop playlist  
add coordinates of confusion to bass face playlist
make a reservation far away at the spotted pig in sd 
rate this album a one
add the current tune to my evening groove list
weather in radnor township  wv
can you find a photograph of ace ventura: the cd-rom game
book the slippery noodle inn in gober 
where is the nearest movie theatre showing movies
how is the weather going to be in pearblossom 
what is the weather forecast for latvia strasburg
find the book cold comfort
play the track that would be something from eden ahbez
i d like to find scriptures of the golden eternity tv series
please reserve a table for five to get chicken fingers at a cafeteria in mexico 
give 5 / 6 stars to expressive processing
book a bistro for 4 at sunset
where can i find the painting of without condition
book a table in fort loudon at a restaurant for 5
use spotify to play me music
give 3 out of 6 to current textbook
add the name the song about the towel to playlist piano in the background
listen to pmd symphony
will the weather be the same here in one week in the same area
i m looking for a game called gateway
play music in the genre soundtrack
please play some fourties music on spotify
add runaljod gap var ginnunga to ashlee s playlist titled forever country
give this book a rating of two out of 6 
what are the movie times for the caribbean cinemas
book a table for one in a bar serving saucisse for meal in calistoga co
play a concerto from sam sparro
rate current textbook 0
lets take me  cherry and tracie to a noyack bar
please help me find i want to take you higher the game
can you give me the weather for here
what s the nearest movie theatre playing testament of orpheus
give 1 out of 6 points to current textbook
give after worlds collide a 1
put the love hurts track onto carmen s playlist 
find the painting retro active
please play jag vill leva i europa by porta
book a table for me and bettye at washington  d c  jewish community center in montana
add tranquility to the latin pop rising playlist  
what is the movie times at marcus corporation
i d give the embers of war saga a rating of 2 points 
play a top fifty ballad by linda strawberry on google music
play deezer tunes are & be
find a saga with 0 rating called poems for midnight
add twin peaks fire walk with me to the night out playlist
play the theme tune that christian fennesz wrote
book a table for 9 people at a delicatessen for april the twenty-eighth  2018 
i need to know the weather seven weeks from now in morgan–monroe state forest
i d like to watch the wedding ring at the movie theatre
can you please put this track onto my todo novedades playlist
what is the movie schedule for general cinema corporation
add curious corn to wild & free workout
give zero out of 6 points to mr american
play thirties symphony music from nigga on iheart
i d like to eat at a top-rated place on nov  the twenty-sixth in the food court  i need reservations for 7 in the city of kane or somewhere near there 
what s the weather going to be in jun  in burkina
add the tune to my jazz vibes playlist
give three stars / 6 to my sister  my love
i want to book a popular tyrolean steakhouse in madison park wa in 1 hour nine minutes and one second
play the trailer for a lineage of grace
add third stone from the sun to the concentración playlist  
find a table at a bar for milagros and i in mount pocono
book a spot at a restaurant with wifi that is neighboring suriname
add the beatles tune yesterday to my playlist  the southern highway chronicles
i want to book a cafeteria for 4 that has meze
add scott putesky to concentración indie rock playlist
4 stars out of 6 is the rating for fires of azeroth
what time is the graduates of malibu high playing at cobb theatres
what s the nearest movie house showing their last love affair
what is the weather forecast for tennessee for warm temps
put any andrew hurley album onto timeless love songs
what movie schedules are animated movies close by
this tune should go on my coffee table jazz playlist
rate this essay four out of 6
i give this book a 5 
what are the movie times for consolidated theatres
give a 4 rating for curtains for three
book a restaurant for four in trinidad and tobago
add caleigh peters to my women of country list
play pease porridge hot by johnny vicious on zvooq
book me a diner close-by benin that serves strolghino for eight people
will the sun come out today in houston
show creativity of the picture the little death
add current track to hillary clinton s women s history month playlist
add what if punk never happened to autumn
i m looking for river disturbance
book a restaurant near the city of wakefield for 5 people 
what time will where the breakers roar be playing
play lastfm tunes from 1997
in the neighbourhood find movies with movie times
what are the timings for starship troopers 2
i want to go to the popular pub at ten pm
look up the game called the long morrow
i want to hear something from the top-fifty by jose pasillas
play symphony music from 1991 by irvin mayfield
play music by sha money xl sort by good 
add hotter than hell to my fiesta playlist
add exit to i love my 80 s rollerdisco list
what is the weather forecast for israel
search for space on my hands
play 1960 chant music by hermann baumann
can this song get added to lunchtime
play the top five songs from robert lockwood junior 
the current textbook gets 3 stars
is it freezing in kelso
rate the ape-man within 4
is the tender years at the nearest movie theatre
i d like to eat in 1 minute at a neighboring neighborhood restaurant 
give me the spirit the earth aflame tv show 
give the last child 4 of 6
play fourties tunes by bryan webb on groove shark
where can i view the trailer jeeves and wooster in perfect nonsense
i want to give this album 4 stars
move josiah leming to te quiero list
what s today s movie schedule
add tune to my para comer
add ali lohan songs in club hits
is dishyum at the cinema
play a sound track by pee wee russell on zvooq 
book a table at atlantic grill in lofgreen
anything close to smith-9th st that can seat two people about one minute from now 
add nico to my rock to work
what movie times at megaplex theatres
i want to hear opera on netflix
book for six for 1 hour and 1 minute from now
i d like to book at a place in ar  looking for an oyster bar that is indoor and can accommodate a party of eight that is also within walking distance 
what s the weather like nearby in rhode island
rate this album zero of 6 points
please tell me what the movie schedule looks like for the amc theatres in twenty one hours
book a table for 6 in new hampshire for next week 
add the artist to my metal playlist 
use deezer service to play opera 
can you play me some pop-folk music
play lil hardin armstrong from itunes 
i need movie times in the area for any type of movies
i want reservations at a restaurant in robert lee for 21:05:17 
add this album to sheri s playlist journey
whats the forecast for january 21  2035 in dubach
add als het om de liefde gaat to my this is handel playlist
where and when is polish economy playing
add this tune to my post metal playlist
rate quantum theology one out of 6
give three out of 6 points to blackbox
find a game called albino blacksheep
where can i find the novel a woman in the web
rate this textbook only three points
susanne and carey phillips want to go to a brasserie not far from pricedale that serves southern brazilian
look up the act of valor tv show
play rock this playlist with badonviller marsch
this textbook rates a 4 of 6 
give me pacific theatres movie schedules
what time is mon amour: shesher kobita revisited playing
what are the movie times for the marcus corporation
i want to see plague soundscapes
give this album 0 stars
find a soundtrack for dante’s peak
add judge jules to instrumental study
can i get the showtimes for fit for a king
can i have the local movie times
is it foggy in phinizy swamp nature park
what is the forecast for warm weather in carl
search for the painting the elder scrolls i: arena
weather for douthat state park on mar  10
play the top-twenty from alexander braginsky 
rate the hindus: an alternative history 3 of 6 stars
where is the nearest movie theatre playing the sword of many lovers
book a reservation for a popular bakery in patetown
need the closest movie house playing the flamingo rising
show me movie times
the current saga gets 0 out of 6
book a table for a party of twelve in lewisville american samoa for a party of 7 at the ballachulish house
will it be hot near calakmul biosphere reserve 3 seconds from now
rate the long dark tea-time of the soul 5 stars
rate the summer king saga a 1 stars
add a song by takahito eguchi to my guest list polygon playlist  
i rate vivian grey three 
add eric johnson song to my the refugee playlist playlist
is arthur 2 – on the rocks playing at 20:44
play mere lapsed by marilyn moore 
show me the movie times for caribbean cinemas in 1 second  
will it be colder in litchfield
is it warm in new jersey in 23 minutes and fourteen seconds
is it freezing in vega alta
i d like to see the the gathering storm tv series
play that would be something by eden ahbez
what time is the glass key playing at caribbean cinemas
play giovanni battista guadagnini s 1982 tracks 
in eight seconds  i d like reservations at a food court that serves sardinian food in pidcoke 
rate the wimpy kid movie diary  saga 4 out of 6
i would like to put taylor dayne on the pop 4 kids list
book a table for seven people at six at the restaurant
add maria magdalena to my poetry in their own voices playlist
book a ukraine pub serves mineiro
show nearest movie theatre to watch black jesus
rate this essay 2 out of 6 stars
add a jacob miller album to my hardcore punk playlist  
find the swindlers at the closest movie house
is rainfall forecast for flying hills
add song to zen focus playlist
i want to book an ethiopian bar for this afternoon 
she me movie schedules for the movies close by at sunset
need a table at a fast food restaurant for me and my kids in brusly landing
what will the weather be a nine in willow river state park
can you find the info wars saga
what is the weather forecast for shasha forest reserve in 43 weeks
play some songs from the fourties by yoshiki fukuyama
find the world is a game
weather forecast for snowstorm on feb  fourth in virgin islands
put hugh masekela onto my music on ibiza guest list playlist
i give the lady decides a rating value of 4 and a best rating of 6
the last novel is a solid 3 out of 6
play the food uncut soundtrack
play a popular ballad by amanda
play on spotify ms scandalous
what movies are in the area
rate the current textbook 1 of 6 stars
look up holy water
table for five at a restaurant in lavina
rate the scarab murder case a one
i d like to add this album to my siesta playlist
show me chasing a feeling painting
play the most popular song from chae yeon off of spotify
fine movie schedules for speakeasy theaters 
find a soundtrack for lords of the rising sun
rate the current essay a 0 for me
will it be foggy now close to jolley
can i go see cash and curry at a movie theatre
find a television show called structured fax file 
i require a reservation for one at the most highly rated restaurant in uzbekistan 
can you find me the spectres television show
i would rate this essay a one and a best rating of 6
i need a reservation for the oasis drive-in for a party of four
find the many loves of dobie gillis
what is the television show phil ochs: there but for fortune playing
i need to book a restaurant in utah in 5 years and a half from now
what s the humidity right now in aguila
use groove shark to play the today and tomorrow album
can i see the movie schedules
add moby grape live to enamorándose
i think this saga only deserves a 0 out of 6 
i want to world of warcraft: tides of darkness 
i d like to eat around id on august the 16th with a party of 8
book a restaurant within the same area of ely for 10 people 
i want to watch strange brother
i need to know the forecast for two am in grand lake towne
play top 20 from frank farian
book a cafe table for one that has internet access
play a loretta lynn tune on groove shark
add metal gear solid 2 sons of liberty soundtrack 2 the other side to edna st vincent millay
can you please find me  journals
i m looking to book a spot at a restaurant in ri 
book in vermont at the maisonette
rate the current essay a 4
play music from 1964
add this song to my workout playlist
find a video game called peaches discography 
can you find a photograph entitled  beneath the harvest sky
when will the boys next door be playing at the nearest  movie house
rate the slap five of 6
i would give the case of the late pig a best rating of 6 and a five for value
book for 8 for argentinian food at a bakery
find goodrich quality theaters films
please find the packed to the rafters work 
show book of pokémon: the mastermind of mirage pokémon
rate orion in the dying time four stars
add track  to this is puccini
play a 2004 song by eliel on zvooq 
put perfecting loneliness onto primavera sound 2016 barcelona 
find time for all about hash
is it snowy in audra state park or within the same area
can i get the movie schedule for eleven hours from now
i would like to hear music from 1993
play soundtrack by armand van helden
i want to see the tv show cause & effect
what s the forecast for this month in apple grove  dc
play some chant music by kevin jonas on deezer 
what is the movie schedule of animated movies nearby
what is the forecast for the current position
add an artist to my playlist domingo indie
i need a reservation for 7 people at a bar in chile that serves bio 
for the star theatres is the belles of st  clements playing in 8 minutes 
book the ballylickey house for 7/16/2027 
where and when can i see the image makers
give whispers in the graveyard a five 
i feel that the loveday trials is rated at a one out of 6 points 
will it be hotter at nine am in serbia
in 1 second i need a restaurant in san marino for 9
give this album 1 stars 
four out of 6 stars for the previous essay
play change has come on google music 
add the darkest red to this is jennifer lopez
what will the weather be in federated states of micronesia at 00:17 am
table for two on nov  fifteenth
play music from lastfm
add album to this is trey songz playlist
find the nearest movie house showing dangers of the canadian mounted
can i get the movie schedule  for films nearby 
add the tune to my viajes playlist
what is the weather in the falkland islands
can you find the painting the crow: original motion picture soundtrack
play some 1970 antero manninen on zvooq 
book me a table for seven in co-operative block building  nd 
what s the forecast for castolon in french southern territories around seven pm
can you get me seating for 5 people 1 minute from now in tuvalu
i want do you want to build a snowman in my hip hop 2017 new school playlist
give 5 out of 6 points to myths of the hindus & buddhists
i want to read the book crash landing
when is cooper foundation on the movie schedule
book a restaurant with pool facility at east gillespie
whats the movie schedule for movies nearby
add artist to my playlist primavera sound 2016 barcelona
play sixties theme music
what s southern theatres movie schedule
i am rating this book 5 out 6 points
rate this book zero out of 6
what are the movie schedule now
book a table at 04:36:28 at the northeast indian restaurant
i want maximilian mutzke added to acoustic concentration
i need a reservation for blue ribbon barbecue far from ny for a party of 10
is it humid in kuwait
find z cars 
give the current album a three 
how will the weather be in bettles  aruba on may the tenth  2026
i d like to rate this textbook 4 out of 6
give me an album from 1972 to listen to 
i want to take my bf and i to get some pain perdu from a food truck
rate tropic of orange a three
will it be colder in colorado nine months from now
please get seating for me and my children
what films are playing around here
give this textbook a 5 out of 6 rating
find a television show called basement screams 
i want another artist on my atmospheric black metal playlist
add jermaine fagan to spring music
add this album the the playlist canciones que lo van a petar
where can i get fight for anarchy
add another song to the acoustic soul playlist 
play wendy james from the fifties
please play me a top nineties theme song
please give a 2 out of 6 to house of many ways
what does it feel like in alloway
add a tune to the this is animal collective playlist 
is az has chilly weather
what s the weather like in north brunswick township virginia
find arcims  a picture
can 50 minute technicolor dream be added to meredith s cierra la puerta playlist
book a spot at the best brasserie near saudi arabia
show me the forecast for anatone louisiana on november 7th
i want to hear techno-industrial music 
tell me the weather forecast for missouri
find a book called the mad magician
please search for the tv series titled i need romance 
show me movie times  at harkins theatres 
play the way it has to be by tom g warrior on zvooq
what is the weather going to be like in epleys in south georgia and the south sandwich islands in 11 months
where to watch television show linger awhile: live at newport and more
add kevin ridel to instrumental madness
add a track to my dinner playlist
i need to go to a restaurant a safe distant from the united states
book a spot at a highly rated tea house in manadonese
add the artist joseph meyer to my mad cool festival 2017 playlist
give 4 points / 6 to last day in limbo
what will be the night temperate in indiana
i think this textbook should have a rating of four and a best rating of 6
play top 100 indie tracks on spotify on lastfm
please add faccetta nera to my this is handel playlist
add mel draisey tomy 80s classic hits playlist 
is the weather freezing in ak
is it cold in breckenridge  colorado
please search the irv gotti presents: the murderers picture 
when is youth without youth being shown at the nearest movie house
book a spot for eight at a pub in new mexico
find the garden of eden
what is the wanda group movie schedules 
movie schedule  of films around here
add candlelight to my house afterwork playlist 
play some popular bryan gregory songs
rate the current textbook five of 6
play music on netflix 
find the nearest animated movies at a movie theatre
rate this album  zero stars
play a rock track from 1984
please play songs by lil jon
locate a cafeteria for two that serves deviled crab
find a movie schedule 
tell me the weather forecast for my current spot
play a paolo gregoletto song
book a table at a restaurant in the cayman islands two hundred ninety six days from now
show the feed the kitty painting
play a popular song by willie dixon on groove shark
where can i locate leo the lion for purchase
show the bridge of san luis rey picture
play music by vybz kartel
give a history of the mind a 2 out of 6 points 
show me the schedule of movies in pacific theatres
find the good wife
rate this book 4 out of 6
i want to put this track on diann s just smile playlist
i need seats for 6 at char no 4 in georgia
i d like to hear the soundtrack for just once in my life 
find the song ticks
find a tv series called live hearts 
book a table for ten people
tell me the forecast for rogers city  ms
add feel the passion to my this is kudai playlist  
what s the weather forecast for here in august
find me under the skin
show me the i can hear the sea movie
i want to hear dave seaman s ep
book a table for a party of 7
play 90s love songs on youtube
where is chips in crouch
i give this novel a 0 out of 6 rating
this novel deserves 4 to 6 stars for its writing 
how do i rate the book white teeth only 4 stars
book a reservation for seven people at a bakery in osage city
please look up the 4-hour workweek saga
book a spot for one at a fish restaurant
add the artist to my spooning playlist
i want to hear rock bottom by playa fly on slacker
find the movie schedule for national amusements 
rate the current saga a two
play burhøns by ernie c 
reserve a spotat the food truck twelve weeks from now
look up the dock of the bay show
play seaside by don cherry 
what are the movie schedules for santikos theatres
i need to see the movie schedules
i d like to eat in iran with a party of 9 on sep  the 12th
play some erin harkes from the fifties on lastfm 
is there expected of rainfall in horton of connecticut
rate the pure weight of the heart series 5 points
rate the current essay three of 6 points
i want to hear some theme music by edsel dope
what films are on the movie schedule around here 
book a restaurant for seven on last december in kentucky
play victoria banks s album
add this track by brian welch to the spring music playlist
i need the forecast for mamaroneck in six weeks
play melody and sort the newest in dj format
i want to give science fiction adventures in mutation 0 stars
play fourties tunes
i need a table in west virginia for me and my baby at jacob wirth restaurant
please search crossing muddy waters work
find a new machine
add this album to my throwback thursday playlist
play shinya yamada music from 1962 on groove shark 
show the movie schedules and films in the area
rate contesting the future of nuclear power a four
i need to book an indoor pub in strabane
play music from the seventies
add steve albini album to my psychedelic rock playlist
add a tune in chill vibes
play any song from rebecca hewitt
where can i view the picture of workin’ with the miles davis quintet
play 1981 music on last fm
give one out of 6 points to this essay
the amityville: the evil escapes chronicle is only a 1 out of 6  
add shot forth self living to my folk metal warriors playlist 
tell me if it ll be colder in steptoe battlefield state park in one minute
add roger nichols to punk rock workout
can you add something by wynter gordon to my soul lounge playlist
book a reservation for me  marva and barbara at a restaurant with parking
show creative picture of brenda’s got a baby
how s the weather going to be at fourteen o clock in falkland islands
play donald rubinstein on pandora
show movies at the nearest movie house
find the picture chorus line
add picasso baby to digster reggae playlist
add album radar latino
i d like to see the painting empire of two worlds
play the greatest music by phoebe snow
is it warm faraway in niger
this chronicle of the origins and history of consciousness is a three
what time is scream of stone playing
rate the current essay 5 points
add ajoy chakrabarty to women of country playlist
play pop music with groove shark
what s the forecast for georgia
i would give this current novel one stars
find the closest cinema playing the st  francisville experiment 
i am giving the book dorothy and the wizard in oz a zero out of 6 rating
rate the white lies chronicle 0 stars
give me the weather forecast for here
can you find the tv show faithless street
what time can i see girls to marry
put this song on the chips and salsa playlist
is terminal station at cinemark theatres
is it going to be warm in palmview
play the most popular album on google music by sasu ripatti
i give out of sync zero out of 6 points 
find a reservation at berowra waters inn in australia in 2 years 
the coming insurrection should get a rating of 1
what movies are playing at cineplex odeon corporation
i d like a table for six at the bakery in as
add don sebesky song to the refugee playlist
look up the rock the blind photograph
add artist to my trance life group
please rate this essay three out of 6
find the schedule for animated movies in the area 
find the trailer for on the good ship lollipop
rate the prince of venice beach 3 stars
give this textbook 5 points
book a spot for one at a pub that serves som tam
will it be temperate near neylandville
show me the picture batman: the long halloween
i want to hear any top five music from gene autry
play laura love songs from 1959
play some geir jenssen 
add michael lepond to electronic bliss
play some art punk 
give five points to the tenor wore tapshoes
i want to read mad money
show movie schedules with movies in the neighborhood
add this song to my list trabajo relax
show the glass cloud – single tv series
where do i purchase the book  baby-sittor
i want to hear some twenties music off of deezer
rate tune to my natalie macmaster viajes
what s the weather in meherrin
where can i find the show game of death ii
book a socca serving steakhouse for 2 in saint james alabama
play some music from 1962 from adeyto
where is the closest movie theatre that is playing movies now
what will the weather be in post falls on feb  17
party for ten at national coney island in de
can you add something by snow onto my zen focus playlist
weather at stanford at six am
rate my current textbook 1 out of 6 points
what films are playing now at the closest movie house
find terminator 3: the redemption  a picture
how warm is it in darnestown
play the hell of a life movie
what is the forecast for colder in anston
get me a johnny cool photograph
play cry baby lane
play me against the world from glukoza
give directive 51 three out of 6 
add one good reason to the bachelor party playlist
put this album on totally alternative
find the show your hand show
i give the prestige a rating of 5
give four out of 6 rating to the cattle king
add this tune to my list jazz vibes
add the current artist to my top 100 pop tracks on spotify playlist
i want to add the tim smith album to my best of 2010 s playlist
is it supposed to be sunny here
add another track to my catch  em all playlist  
i need a reservation at the one eighty for elsa and wendy in muscle shoals 
what films are showing in the area
play the last theme by behzad mirkhani 
play a popular sound track by joe pass on itunes 
show me a forecast for french polynesia
will the weather be temperate on jan  the thirteenth  2028 at christmas island 
book me a restaurant in aransas pass in seventeen hours
add the pop tarts to my this is astor piazzolla playlist
book a table for 10 people at a restaurant which offers internet 
show me the movie times
find me the book called suffer
add karin dreijer andersson in escapada album
play my springtime playlist 
will it be snowy in pillow indiana
give letty fox: her luck 4 out of 6 stars
where is the nearest cinema showing horror films today
play some katiejane garside on vimeo 
find movie times for great escape theatres
which animated movies are playing at the nearest movie house
add the game to 80 s party
what movie theatre is playing shed no tears
show me the television show children in need rocks 2013 
rate the writing on the hearth 2 out of 6 points
add artist to my friendesemana playlist
where can i get a photograph of death knows your name
i want new steps to go on the leche con chocolate list
i want to book a restaurant in a distant id spa for lidia  latasha and diann 
i think the current album should get a four out of 6 rating  
add petar georgiev kalica song to my push button funk playlist
the enamorándose playlist needs another album  
make me a reservation at a bar for a party of 7 in indonesian
rate lost boys: why our sons turn violent and how we can save them zero of 6
book me a table for seven in neighboring france 
play some tango 
find me the when harry tries to marry photograph
i d give the day of reckoning four points
book me a restaurant in ware shoals that serves russian tea cake
book a restaurant in palau for two people 
please search a new machine tv series 
book a table in belhaven for a party of seven at the great house at sonning
use netflix to play a record by emil gilels from year 2015
add this tune by hart wand on this is wagner
add inca roads to my weekend
restaurant named the palm in tennyson mi
i d like to eat at old dutch in 15 seconds in northern mariana islands
find the show titled the most charming and attractive
i need a table for 8 during midday in montana
for the current essay i rate 1 out of 6
add yang hyun seok to the playlist called night out
i want to get the movie schedule
is there a depression in delta junction
start up my pachangueo total playlist  
which movies are playing in the neighborhood
which cinema is currently showing the youngest profession
book table on the 23 in illinois at the maison parthenais-perrault ii 
where can i find richard the lionheart: rebellion
i want to rate this essay 0 of 6 stars
what is the movie schedule for the b&b theatres
add another album to my friendesemana playlist  
this saga deserves a score of four
play sense tu from ebi hamedi
play greg raposo songs from the thirties
get me the trick or treats soundtrack 
i want to book a restaurant in 40 weeks in iowa 
i m looking for 1634: the ram rebellion 
i rate this novel 5 of 6
will there be a storm nearby
will there be wind in me
this current essay should have a best rating of 6 and a rating value of three
play something by louisiana blues
book a spot at a pizza place nine weeks from now in wisconsin
add teenager to the queen playlist
please search for the work  all the wrong reasons 
how is faraway cloudy at 02:45 am in brumley
i giv the current novel a four
blood colony was awful  i d give it one stars at most 
book a diner for 1 in green isle
my step aunt and i want to go cheese fries at the tavern
is people of the cumberland playing at landmark theatres now
rate this album 2 stars
add joe gibbs to my the bachelor party playlist
play a tune by syreeta wright from twenties from the top
book a restaurant in fl in the city of lochearn for my step son and i
using stars the current object gets four for the textbook out of 6
what animated movies are at the closest movie house near brunch
add o b mcclinton to my playlist called women of electronic
play fifties music
i give the blood book five stars
i want to add kool keith to my chill out dinner playlist
find oman medical journal
find a reservation for mar  20th in winnie at any restaurant
play thirties concerto music on google music
play music from the track my friend on google music by steve sholes
where is the nearest cinema playing compound fracture
add the tune to my epic classical playlist 
the next book is worth two
add kjetil vidar haraldstad to my para entrenar playlist  
what films are showing at century theatres
fimd glory
find a table at a pizzeria in new hampshire that has parking
reserve a table at a restaurant with wifi in france
book reservations for ava gonzales  raquel brown and i on jul  6  2040 in hainesville at a restaurant
rate the book who will cry when you die one out of 6 stars
find a soundtrack called meet the vogues 
i want to book seats for 2 at churrascaria using the internet
i think the chronicle entitled the spirit of st  louis should be given a zero rating 
book a table in mt for 3 for now at a pub that serves south indian
what is the weather forecast for papua new guinea
send the track from andrew hewitt to the piano ballads playlist
rate the current textbook a 5 
put united abominations onto my rare groove playlist
play some iris dement s theme based 2015 music on lastfm 
put bring me down onto my tokyo rising playlist
i m going to herkimer and want some liver and onions and i need a table for bessie  antonia and lisa at a cafe around 10 am
tell me the weather forecast in 4 years and a half in ga
find a game called bump the show
i d like to listen to opera on youtube
show the invisible hook trailer
find the schedule for kingsman: the secret service at a movie theatre 
rate conan of the red brotherhood 2 of 6
rate the current book series two out of 6 stars
please put david van tieghem onto my throwback party playlist 
locate the best pub in apache junction
i d like to hear nas s greatest ballad
show game alien breed ii - the horror continues
where can i find the picture of house foundation
play a song by david silveria from 2002 on zvooq 
please add this rex griffin tune to the steampunk playlist
add desert sessions to my i love my 80 s rollerdisco playlist
tell me if it ll be chillier now in engadine
rate this textbook 3 out 6
i need to make a reservation at a top-rated moroccan restaurant in bone that is nearby and can seat 8
find movie schedules for animated movies in the area
add josephine wiggs to my kickass metal playlist  
play a song from the seventies by pepe aguilar
i want another album in my disco fever playlist  
add atticus ross to the electrosafari playlist
where can i buy the lying game
book a restaurant in wi at 13:22:34 for 9 people 
what s the closest cinema playing chuckys baby now
what is the afternoon forecast for shannon and pitcairn islands
check the forecast for natchaug state forest
what is the movie schedules for the harkins theatres
add bert mccracken tune lo que suena new york playlist
rate colorless tsukuru tazaki and his years of pilgrimage one stars
what is the weather in kernersville greece
play 2004 guy sebastian on itunes
give two out of 6 stars to current book
please add to my playlist hype the name introducing a r rahman
find focus now list and add eylem to my playlist
book a spot for 3 at the pizza place
what is the weather forecast for sep  the 14th  2038 in north dakota
i m looking for the best bistro that serves mongolian food that has room for two people in marshall islands 
play some david mallett on last fm
find movie schedules for dickinson theatres
i d like to watch a storm in the stars at north american cinemas
add joshua radin to my playlist called futuros hits
give this textbook one stars out of 6
i give this current textbook five stars
is there a storm in the weather forecast for baraga oregon
play me a 1958 adam yauch concerto on groove shark
in taiwan will there be rainfall in willimantic
book a food court in supper time distant from northern mariana islands for me  winnie and courtney 
give this album 4 out of 6 stars
play me a jill scott sound track on deezer
i want to go to antigua and barbuda and eat at a table for 4 
i want to hear popular music from martin lopez
give me the movie schedule
play a 2011 ballad by evil jared hasselhoff on lastfm 
what is the weather forecast here
rate the type one super robot five of 6 stars
what will the weather forecast be in mount victory  delaware in 1 second
play slacker radio 
play some antony harding songs from the eighties
add opus de funk to my list acoustic blues
add 2012 zwanzig zwölf to my miami 2017 guest list
rate this book a five 
put frank farian on my deep dark indie folk playlist
play some indie music on spotify 
i m craving mac and cheese  book a table at a portland mills  ks restaurant  i need it for one second from now
is one night surprise at the cinema
what are the movie schedules for animated movies playing in the neighborhood
what will it be like in six pm at the current place
where is the country bears playing
find the movie schedule 
what will the weather be in virginia
book me a reservation at an oyster bar that serves crab cake for two people
rate the joy of gay sex a 5 out of 6
where is the yellow star: the persecution of the jews in europe 1933-45 playing
get me a table for 3 within walking distance from my hotel in tajikistan 
book me a restaurant where i can get a burrito
i want a restaurant reservation for a party of 8 at a vegetarian tea house 
for this essay i give a posiabble 3 of 6 
add ultimatum to my crash course playlist
how cold is it in martinique
play the latest thelma aoyama
open groove shark and play native us
add ashley cafagna tesoro to my reggae en español list
put king of america onto the playlist with the title a sudden rainstorm
add camille to the this is lady antebellum playlist
weather for 9/3/2034 at bridle trails state park
i rate wideacre five of a possiable 6 
what time are movies showing around here
make me a reservation at a fast food restaurant for elba and corina at a restaurant with parking
book a table for josie  carissa and lindsay at a brasserie which serves trentino 
the forest should be rated a four
is it getting colder in leonard harrison state park
show me tv series lego star wars 3: the clone wars
add harry chapin in stress relief playlist
play music year 2016 by artist michiru yamane
find the apple address book television show
look for the nypd - new york police department saga
rate the current saga four stars out of 6
can i get the showtimes for films at the closest movie house 
rate this novel three out of 6
will it be windy at 7 am in dong phou vieng national protected area
get me a table for 2 people 1 second from now in tunisia 
play a soundtrack by mike hindert on spotify 
will it get warmer by 5 am in washington
need to find the soundtrack called fire in the valley
i want a list of showings of days of fire at harkins theatres
i wanna hear something on spotify by eddie vinson
what will the weather be like tonight at greenfoot quarry
i need to hear the song aspro mavro from bill szymczyk on youtube
add joplin in concert to my feel good dinner
play some 1954 songs on my itunes 
show movie schedules
i want to book a restaurant with creamed eggs on toast on kansas day within walking distance of british indian ocean territory
find innocent world
what are the weather conditions in noel
i need a reservation for eight for a brasserie that serves spanish rice
i want to add a tune by damon johnson to my frescura indie playlist
showtimes for the alamo drafthouse cinema for todays movies 
can you provide me with movie schedules for century theatres
rate the high deeds of finn maccool one out of 6
tell me the weather forecast for korona
i would like to book the best southeastern brazilian food court 
what s the weather like at powers lake
add track to my spring playlist
what time is murph the surf playing
find the way west show
united states has warm weather on next wed 
i d like to see movie times at santikos theatres
add this artist to my feel good dinner playlist
show movie schedules at megaplex theatres
book a reservation for three at a top-rated sicilian restaurant in portugal
book a spot at leopold cafe in bhutan
rate the summer job 5 stars
please rate the current textbook 2 stars
book a pub in clermont for 8 people 
i d like to see the game called god is in the t v 
book a table at a restaurant in portugal with parking for me and bonnie in 19 minutes
where can i buy a hardcover copy of the book the intangibles of leadership
play the putrefactive infestation trailer
book bridge round house for one at meal time in democratic republic of the congo close 
create a theme station with jim creeggan records and collabs 
find boyish story
this book gets a 1 out of 6 rating from me 
book me a bar where i can get a bear claw in as
i rate the saga wahhabi islam: from revival and reform to global jihad three out of 6
add this track to morning classical
add tarte to bandas sonoras playlist
book a restaurant 1 hour from now in dorchester shores reservation
play everybody wins trailer
will there be a blizzard at a 4 am  in sky valley
search for informix wingz
play the tv series bet awards 2013
rate this album zero of 6
will it hail in villa
play the top track by claudja barry on last fm
add artist to todo edm
can you tell me the weather forecast for six am in grenada
play me music from the twenties on itunes 
start playing my disney playlist 
play the best songs of 2016
give me some info on when hands across the border will be laying at the cinema 
whens the next showing of the game of their lives
give the current saga a three
i d like to watch films anywhere nearby
book a table for 6 in the cheese course  blocher on february the 10th 
1 point for this next textbook
find a tv series called church of the truly warped 
i want to hear music on my slacker app
lets hear some booty bass
is proudly she marches playing anywhere
book georgetown cupcake in keller for tea time 
put 4 points to the last island book
what films are playing at kb theatres
add the singer damon johnson album to my african heat playlists
play the best bruce ruffin music on youtube 
add a song to playlist chill hits
add the artist verano to my michael mantler playlist  
show me the trailer for american education: the national experience 
when and where is invitation to the waltz playing 
what is the weather forecast for july 20  2020 in dachigam-nationalpark
play sound track  music from the twenties
add partners in crime to joann s lo que suena los angeles
i need to hear a thirties soundtrack
give the current novel a 3 out of 6 rating
i want harris to be added to my latin dance cardio playlist
is it going to be colder in queen anne on mon 
rate the current essay five out of 6 stars
i want to know the animated movies playing at malco theatres
i need to book a restaurant in sunnybrook for 7
show me movie times for movies in the neighborhood
book a table at top pot doughnuts in greensburg  american samoa
get me a reservation for 1 somewhere in spade at seventeen o clock
add ernie hawkins to the dubstep playlist  
play joshua homme belle and sebastian write about love
book a food truck that serves tarte for tanisha  lorena and juliana 
find me the album the demon
i want to hear the new vasilis tsitsanis ep
will the weather be temperate 22 minutes from now in alba
i need a table booking for a highly rated sardinian pub 
find the movie schedule for films in the area 
play groove shark
add an album to my sylvia plath playlist 
can i see the movie schedules nineteen minutes from now
add the greyest of blue skies in indie español my playlist
add this album to rock en español
add lapponia to my flamenco pa ti playlist  
book a table at a bar in argentina 
play hættuleg hljómsveit & glæpakvendið stella by kaori iida
book a highly rated restaurant 
i want to hear jimmy james from the thirties  play a song on groove shark 
play spotify
add another song to daphne s retrowave outrun playlist  
book a spot at bobcat bite in needmore for ten am
what time is the night before the premiere playing at the movie house
i need seats for six at a vegan bar in london borough of enfield or the same distant in one second
play sixties on spotify
find the movie schedules at magic johnson theatres
show weather forecast for dovre-nationalpark
tell me if it will rain on 4/19/2030 in angola
rate half past human three stars
play music by otis redding 
rate the current textbook four out of 6
give the denationalization of money series four of 6
where will the blonde from peking be playing
make me a reservation somewhere outdoor in port wentworth for a party of five at a coffeehouse in ten months  that is distant
play google music tunes
i want to book a restaurant in keeling islands for a party of ten
find word of mouth for me
what s the forecast for right here
can you play a sound track from 1963
i d like to eat english cuisine at a restaurant in ettrick
what will the weather be like on january the twenty-third  2034 in ga
give two stars to scribblings
play the top twenty movement songs from roberto valverde
find an album called list of re: hamatora episodes 
can you play some music on youtube
rate this book 2 stars
find the movie take another picture
will it be hot on december 28 in ayr  mi
at my current spot is it going to be hotter on nov  the eighth
find a song called you cross my path 
give me the weather forecast for nationaal park garphyttan
add track to dance playlist
rate new history of the five dynasties 1 points
will it get chillier within walking distance of pw
make reservations for 7 people at a top-rated brazilian pub around rockaway park-beach 116th
i d like to eat at a pub in arkport
what will the weather be for hooksett
play the top 10 by sankha chatterjee 
play some google music 
book the lake house for me and carmella
book a table at an oyster bar that serves apple butter on jul  10th  2028
find movie times for close by films 
i need to know the weather at the queen elizabeth national park
add warm and beautiful to the ironing playlist  
is lord jim at the movie house
book australian food in armour for 7 pm for four at a pub best rated in ut
me and edith want to eat in coventry lake
rate this book five out of 6
where can i find the jkt48 school
how temperate will it be in blyde river canyon nature reserve on jul  the 18th
add this tune to my primavera sound 2016 barcelona
play me the song just to see you smile 
what is the baotianman national nature reserve forecast
add a song by claude vonstroke to the under the surface playlist 
play the top-ten chant doda songs from the twenties 
book near montana restaurant serving sri lankan food for 6 that is highly rated on tues 
can i get the movie schedules for megaplex theatres
find digimon next
i want to eat at a bakery with deidre and rosa in jersey 
give the current book 0 points 
add arthur russell to my women of disco playlist  
find a show called some kind of dangerous 
i need rave slacker to play
play a theme from 1985 by patrick cowley
show me the tv series called take me to your heaven
play playlist chilled r&b
add david cole to an instrumental sunday
what is mo forecast for hotter temps in kalkaska
what is the forecast for the current place for sun on january sixth  2028 within walking distance
book a restaurant for nine on 16 hours from now
is it going to be windy faraway from the valley of fire
find the movie schedules for films in the area 
find the tv series the almighty johnsons
book a fast food restaurant 
show me work of truth and tolerance
find the terror within
play music from artist ashley
book me a table at the highly rated cafeteria in federated states of micronesia
add enduser song in grime instrumentals
is love is a ball playing right now
look for the game find another way
add track to kickass metal
play halid 08 by video game pianist on pandora
book a restaurant for august fourth not far from the marshall islands 
play the most popular miles jones track
play music from the punk genre on last fm 
play gloria on last fm
can you find the photograph titled so long self
is it going to be sunny on oct  twenty-seventh  2031 within the same area of this current place
show creativity of official history of australia in the war of 1914–1918
add another mc chris track to my blues roots playlist  
what are the movie times for animated movies in the area
find movies playing at the closest movie theatre
when is the jailbird showing at united paramount theatres
add this tune to my 70s road trip list
play a ballad by chick corea
play music which has humour on youtube 
can you get seating for a group of 6 at twenty o clock at a restaurant and spa faraway from palmyra
what is the forecast for a day from now in liechtenstein
open youtube
book a table for 10 at the dunbrody country house hotel in serbia
what s the weather this summer in djibouti
give home is the hunter zero stars
give the current novel a one out of 6 rating 
book a restaurant for one in al 
book a spot for gay ramos  janice gonzales and i at a bar in timbo
on 10/14/2026 i have two people to eat at coney island hot dog stand
play satire music
find time for movies at the closest cinema
what will the weather be in double oak at 12 am
please put another tune into the laundry playlist  
put this tune onto the signed xoxo playlist 
find racing the beam: the atari video computer system
can you play a melody from the fifties on last fm
add this jane olivor track to my the sleep machine waterscapes
i need a reservation for a brasserie that serves ankimo in pw
i want to watch mr  and mrs  bridge at a nearest cinema
book me a table for me and my nephew near my location at an indoor pub
let me use netflix to listen to the last soundtrack from out of eden 
tell me if it will it be windy in grizzled squirrel wildlife sanctuary
book a table for 3 at one of the restaurants in washington  d c  in riverview
find a saga called the devil went down to georgia 
play clifford brown all stars by michael balzary
please search the abby saga 
rate this book four out of 6 points
will there be a blizzard in egypt
what are the movie schedules at loews cineplex entertainment
what is weather in azerbaijan 16 seconds from now
play shining down by tsukiko amano on pandora 
i need the game the aria music show
include the album by arthur rhames in urban poet
find live at the brixton academy 
what is the twenty one o clock forecast for the current spot
what is the forecast for 6 am in aruba
how much wind will there be in nm on november 11th
give three points to current book
add track to my digster future hits
rate the practice of the presence of god one of 6 points
will it rain 17 weeks from now in teide national park
what s the weather forecast for the northern mariana islands on 8/4/2024
i d like to see the showtimes for silly movie 2 0 at the movie house
add jim martin to deathcore 
check the forecast for hulmeville  wv 
add villotta to the metalsucks playlist playlist
book a reservation for thomas hynes house on jan  the third in netherlands
play any sixties song
find me a table for me and my grandkid in union square cafe
rate the myth of matriarchal prehistory series a four
find dipson theatres with swiss army man at 8 p m 
play some gothic rock 
rate the broke: who killed the middle classes chronicle a five
please fine me the east trailer
book a reservation for my great grandfather and i at a macaroni pub in ct
rate the prince of providence 2 points
add bill evans to the motivation mix playlist 
play while we were waiting by sippie wallace on vimeo
book a spot for marci  marylou and amelia far from north korea
book a churrascaria restaurant that serves spring rolls for one person 
play music on itunes
play the song long live love
add this tune to my rock this
i give this current book four stars and a rating of 6
i want to watch the show frank sinatra sings the select sammy cahn
put transatlantic lullaby on sharlene s napoleon xiv playlist
find the movie schedules for speakeasy theaters 
show me a picture of nokia football crazy 
fimd films around here
play acid punk music 
i give what we talk about when we talk about love a two of 6
what will the weather be in catahoula national wildlife refuge
tell me the forecast for elderton  indiana in 19 hours
rate this essay two stars
play some p  j  proby
play the latest songs by larry gatlin on iheart
make me a reservation at illinois central railroad freight depot in singapore with vickie rodriguez  lila reyes and ruby
what are the movie schedules
play robin hood and the bishop of hereford by jon mayer
tell me the weather forecast 1 hour from now in big thicket national preserve
i d like a table for two at a brasserie in são tomé and príncipe
i want to see a list of local movie times 
show angels of iron television show
search for the george and the big bang tv show
book a southeastern brazilian cusinie pub
find a tv show called the ambient collection 
i need to book a table at a food court in nh that serves smelt
book me a reservation at rustic inn
book a table for me  leanne and tami at a restaurant serving caucasian food
play the playlist  a mis niños de 30 
what is the forecast for dr  julian g  bruce st  george island state park for rainy weather
rate varney the vampire with 1 points
will it be chilly in two hundred thirteen days at dochū-kōtsu prefectural natural park
find the radical history review saga
please look up the lamentable journey of omaha bigelow into the impenetrable loisaida jungle television show 
rate ecology: from individuals to ecosystems five out of 6 stars
book a table in hallwood for one for supper
i need to add a tune by amanda stern to the playlist cloud rap 
add a song from randy rhoads to my 50 clásicos playlist
add kansas city  missouri to stress relief
book nuts on clark in irvington for 8 people in one hour 
play me a tune by mick brown
add i’m only a man to my flow español
play the playlist introspective
i want to make a reservation for one at a sushi restaurant in brucetown
rate the current book three out of 6 
on may the thirteenth  2037 what will it be like in wilderville  montenegro
me and my grandmother want to eat umbrian food on january the 7th at a brasserie 
will there be a snowstorm at my current place
showtimes for the closest movie theatre that is showing operation autumn
book the union oyster house in guanica puerto rico 
weather for marshall
find the movie schedules for movies close by
rate this current essay three out of 6 stars
is live forever: the rise and fall of brit pop playing at the closest cinema in 1 minute
book a table at a restaurant in saudi arabia that serves presskopf
i wish to put tom baxter onto my coffee table jazz playlist
will it be foggy on the town meeting day vermont in angola
i d like to get reservations at a top-rated restaurant in arkansas 
play bra vibrationer by dean
weather for now in cape romain national wildlife refuge
go to the saga the quantum thief
what is the closest movie house  playing films
add tune to downtempo beats
what time is the christmas toy playing at loews cineplex
find old school junkies: the album  a video game
i am giving this novel 3 stars
add artist steve cropper to rhythm and blues
find zorro the game
play me some goa
play me the tv show the women of our home
play the soft parade 
she me the weather in the current place for nov  the 9th
what is the movie schedule at loews cineplex entertainment
i want another track added to the korean osts playlist  
play some music on pandora
show the soonchild painting
find the little death  a soundtrack
play kk on zvooq 
play me a felix kubin from no light on spotify
rat short trips: a christmas treasury a 3
please play music off the soundtrack by beau jocque
i want to hear ready by frankenstein drag queens from planet 13
i want to get reservations at a place close by for 6 people to eat in sc 
play some spotify by danni bassan
what is the movie schedule for the movies that are playing nearby
what will the weather be in rutherfordton rhode island on september 22nd  2017
book a spot for two at sale creek at eight am
what time can i see older office lady: using her seductive tongue at star theatres
rate the nightmare fair five out of 6 stars
would like to book a restaurant the last day of sukkot for lee and ines
for my playlist post garage wave revival add the name  eternal prisoner 
find a tv series called manufacturing consent 
i would rate eater of wasps a value of zero and a best rating of 6
make a restaurant reservation for me and my son at twenty three o clock 
what will be the weather like close by kackley
show tv series schedule of gears of war
find the prince of temple street  a picture
hook me up with a song by dancing girl 
please play got the time
put jiro in my clásicos del hip hop español playlist  
add put your hand inside the puppet head to the playlist named lazy chill afternoon
book me a restaurant that serves hot chicken in dutch mills  north dakota for 10 people for 3 am
please add this song to indiespain list
add song to sleepytime
this next essay is worth five
list movies by movie times in the neighbourhood
play some music on lastfm
0 stars for this current saga
i give this current novel 0 points
rate the drowning a 3  
what films are in the neighborhood
need a table for rita  antoinette and i
put glenn stetson to my your daily routine playlis
show creative game fear thy neighbor
what films are playing at dipson theatres and when 
the horrible current essay gets only a 0 out of 6
rate the current book two of 6 stars
find the mystery woman saga
tell me the movie schedule
find a table somewhere for me and my step mother in graniteville de
find hear me good
can you please get me come away with me show
find movies close by
give me the movie schedule for animated movies showing in the neighborhood
book a spot at a tsipouro restaurant in connecticut
will it be colder at five o clock at the apolobamba integrated management natural area
include sean yseult in kaitlin s metal overload playlist  
how chilly will it get here 
is saint robert hotter than turkmenistan
find some of my best friends are   the piano players
book something for me and my wife at a restaurant in four weeks
book a table for nine people next mar 
add progress to my clásica para todos playlist  
i m looking for the movie called the beast that shouted love at the heart of the world 
include the past behind in my top 100 rock tracks on spotify playlist  
book a spot for elise and alma at a brasserie in ravensdale mh for this week
play music by amii stewart with itunes
add an espen lind song to my list lo que suena new york
show the sad songs for dirty lovers album
i d like to hear ami suzuki s latest record
play a record from 2010 
book a pub for helen and miriam in nine years from now
please make reservations for a bar close-by in lake alfred 
is the umbrellas of cherbourg playing near me
what will the weather be like in arizona on october the 3rd
play the most popular track from valery alexandrovich kipelov
what time is the world according to john coltrane playing
what s the weather forecast near to fern creek this winter
rate this textbook 2 stars
what s the weather forecast for aug  8  2020 at my current location
i want to hear somi s songs from the twenties
open pandora and play reggaeton 2017 y baila
book me a reservation for an outdoor restaurant
book a table not far in wy at a gastropub with internet for me  jenny and antoinette in one week
play post garage wave revival playlist 
look up the searchlights painting
plpay my disco fever playlist 
please get me the work shirley aviatrice 
i need a reservation for the french laundry in oh for six
find a painting called mr  scarface is back 
what is the nearest movie house playing new york melody
what s the closest movie house that s showing animated movies
what is the weather forecast in canfield at 22:23:22
is there hail forecast for hale center on 7/22/2030
list films at the nearest movie house
when is watchman vadivel playing
forecase for ohio in twenty one hours and one second
will it rain today in french southern territories of highland beach
wish to read the novel called the wizard of stone mountain
book a reservation for a bistro
find films at magic johnson theatres
i think this textbook should be rated 5 points
play marche lorraine by rachael lampa
need weather forecast for stacy in vanuatu 
i want to play the video game international pinguicula study group newsletter
book a spot for 9 in new mexico
what s the forecast for al twenty one minutes from now
is temperature in hanksville freezing 
i need a table in east timor for a party of nine at 5 north st
where can i see no time to die
add john brown to my dinnertime acoustics
add a compilation of warped music ii to workout twerkout playlist
give the book men and the city 3 out of 6 stars
is it overcast in south carolina
please search for the two faces of my girlfriend saga 
give the pirates in an adventure with whaling a 0 out of 6 
play revival music 
search for the trailer the thieving magpie
is there a blizzard in tennessee colony  ks
is mentioned in confidence at the cinema
reserve a table for 3 people at the cubby bear   in comoros 
rate this album 4 points
i give the saga to the woven path 1 stars and a best rating of 6
is it going to be temperate at six am in washington
look for the public toilet painting
tell me what films are currently playing at amc theaters
add this song to the novedades pop playlist
look for every little crook and nanny
i d like to book a table at a restaurant for a group of 4
play new movement from mike oldfield on vimeo
use deezer to play the last song from lee dorrian
can you play that last ep from the twenties
play the mother lode by tamio okuda
is amco entertainment showing cień caseya today
is it chillier here
how chilly will it be at 09:32:06 am in moncove lake state park
is it hot in zephyrhills
rate this series 4 stars
what s the weather going to be like in fort point  san francisco tomorrow
add another song to the acoustic soul playlist 
find manual of love 2 
weather within the same area as qatar at four
make and play a new playlis with the theme songs released in 1968
book a table for lois  effie price and i for next summer in italy 
play my frescura indie playlist 
play a new soundtrack by benjamin darvill on groove shark
give one out of 6 points to this album
book a restaurant in mp at 3 pm with pigs in blankets
what time is chandranath playing mjr theatres
find the schedule for without witness twenty two hours from now 
i want to eat at a escondida south carolina restaurant for 8 people
i want to book a restaurant in wallsburg  missouri for michele  diann and pam
book reservation at a restaurant in rocky fork for 2 people
i m looking for the last track by fei yu ching from the fourties
play tales from the organ trade
play me something miles davis did with a symphony
can you make a reservation for next year in modesto for joanna and ella
book a restaurant for 9 people 
this current textbook should have a rating value of two and a best rating of 6
rate the plutonium files a five
rate the stars shine down 5  
play sivamani
i d like to watch heartbreak at pacific theatres at two pm
rate the current novel 1 of 6
is it going to be chilly today in abo  wi
add unconscious state to my 90s smash hits
make me a reservation in crugers at marlton circle for a party of eight
add an album to corinne s beast mode playlist 
rate cia world factbook five out of 6 stars
what s the weather forecast for here
add this track to my this is thomas rhett playlist
rate this chronicle a 4
i wish to listen to eighties music by mike dean 
play a 2007 track from adam jones
how snowy will it be in this current place on feb  first  2034
rate the young elites series 1 of 6 points
what are the movie times for the movies in the neighbourhood
what time is the eddy duchin story playing
give me a forecast for carol city
rate the daughter of the empire three out of 6
book a spot at rimsky-korsakoffee house in mackville
add the chamillionaire track to lina s wedding classics playlist
book a table for seven during our thailand trip that is within walking distance of our hotel 
rate this textbook one stars out of 6
find my tribute show
rate cock and bull 5 of 6 points
where can i purchase the game dancing in the dark: 10 years of dancing ferret
add the album to the six string peacefulness playlist
show creativity cum on feel the noize the video game
add come on a cone to power walk playlist
can i get the showtimes for the closest movie theatre that has the newest films 
play some fourties andrew lloyd webber on groove shark
book for my girlfriend and i for truffade at a gastropub in west virginia
i give the savage mind a rating of zero out of 6 points 
where to see painting twelve angry men
play the greatest adrian kowanek music
play playlist a mis niños de 30
play the top twenty tracks of ron jarzombek
find the movie curl
what movies are playing at marcus corporation
rate the current chronicle series 4 out of 6 points
what s the weather at zero pm in papeton montserrat
looking for a tibetan restaurant and need reservations for 1 
where is the closest cinema playing osmanthus alley
find a video game called ibm program temporary fix
add boyce and hart to urban hits playlist
find a painting called boating on the river epte 
add the tune to your favorite slaughterhouse playlist 
find movie schedules at loews cineplex entertainment
i want to hear a top five ballad from 2002
play chant music from 1993
play some mike burney on google music 
find brandy in the wilderness
book for 2 at a cafe for burgers in gasport
tell me the weather for comertown
book seating for one person at a food truck
play newest robert palmer sound track
give the current album 0 out of 6 stars 
please give me movie schedules
find join the dots: b-sides and rarities
what are the movie times for megaplex theatres
will it be hot three minutes from now faraway from saint croix state park
find once upon a time in the west
add the artist michael schenker to ina s this is jennifer lopez playlist
give the current chronicle 3 of 6 stars
tell me the weather forecast for equatorial guinea
what time is the crystal gazer playing at the closest cinema
is it snowy in fort ross state historic park
how cloudy is it in morrisonville  kentucky
what time is film showing at southern theatres
book a table for eight people please
play say a word by la india
play some industrial music on lastfm
look up applied linguistics
i want to see the tv series a state of mind
can you search a song for mama book for me
book a restaurant for one person at three pm
add something by paul whiteman to my sweet soul chillout playlist please
what s the weather forecast for my current position
in two hundred forty eight days  what will mp weather be like
for my playlist jazzy dinner add the name kick over the traces
what is the close by greenland forecast
i need the weather at noon for e a  vaughn wildlife management area
tell me if it ll be snowy in coastal landscape park on october 2  2027
is it hotter here
find the dead matter at speakeasy theaters
i am rating this current novel three out of 6 points  
book a restaurant faraway from albertson now 
put tony rombola on my novedades viernes sudamérica playlist
rate puttering about in a small land zero out of 6 stars
play some bass music 
play funtime activity
book the chapter one in bosnia and herzegovina for patti  hester richardson and camille
book a russian restaurant for 4 people 
what is the weather forecast for cuba at eleven am
rate this novel a two out of 6 
play wait until tomorrow
please find the show kim hyun-joong discography
will it be hot in new york on october the 1st  2026
table for 4 in sparks
what will the weather be in cummings mississippi in eleven years 
rate the life and loves of a she-devil 5 out of 6
is black & white: the dawn of justice playing at the movie theatre
we want to eat at a brasserie with sicilian food in nebraska
i would rate this novel a four
find the show carnik con
showtimes for animated movies in the area 
where can i find the world according to paris
rate special assignments 0 of 6 points
give this textbook a 4
what is the movie times for general cinema corporation
find a table at a restaurant that serves corn relish in venezuela
will it be chillier in saxis north dakota
add a rating of 0 out of 6 stars to the lady of the aroostook
play some music by mark heard 
put take up thy stethoscope and walk onto my verano playlist
weather for swaziland
i want to hear a sandra ep
rate current album 0 stars
what s the movie schedules for in the neighborhood at the movies
which is the nearest cinema showing movies that start in nineteen seconds
find laserlight 
how will the weather be in bhutto family mausoleum next autumn
i d rate this novel a five
book me a taverna restaurant
find the song titled the mole show live at the roxy
what is the weather forecast nearby sc
what is the forecast for de on 9/11/2035
find the international journal of robotics research soundtrack
i would give hell hath fury one points
book me a reservation nearby my neighborhood
find live in tokyo for me
search for the world is a game
find the dressmaker 
rate the current album 5 points
where is the penthouse playing
play the newest chant by john doyle on zvooq
give 3 out of 6 series of the africa house
what films are showing at cineplex odeon corporation
add song by emmy rossum to hit rewind
book a table for 1 at ringside steakhouse in hurricane 
find a table for one at a popular churrascaria for three weeks from now
book a table for 6 at a restaurant in pershing square  manhattan at two am
show the movies at the nearest movie house
book a steakhouse with a spa for seven people 
book a table for ida  monica and etta at cold spring tavern in md
find a movie house closest with beethoven lives upstairs
find under night in-birth
play saturday nights & sunday mornings
rate the current novel 5 of 6 points
me and katharine would like to go eat at jan  22nd in ia
can you put tire me onto my new music friday latin playlist
when is spyforce playing
i award this next series 0 points
play music on iheart
what are the movie times at the loews cineplex
play tom jones album from the twenties
play the album jack takes the floor by tom lehrer on netflix
i want to eat at a highly rated food court
will it be chillier in la mesa
what is the movie schedule of animated movies in the area 
look for the show named chestnut mare
add my hands to travelling playlist
please include danni bassan in my perfect concentration
i want to hear gloryhole from mani off of lastfm
add artist rob dougan to electronow
rate the gorilla hunters 0 stars
what films are playing at the nearest movie theatre
swine not deserves four points
i need a table for 3 in ak 
is it going to be nice at 6 am at chippewa lake
add igor talkow to my women of k-pop list
i need to find a restaurant for ten people at twelve am in liechtenstein 
what will the weather by close by the current position at 02:02:30
add the artist p d q bach to the te quiero playlist
can you find me the real mccoy novel
rate lord of the world a value of 4
play the last song from the thirties by airto moreira
for the book ethics  my rating is 2 out of 6
can you find fire escape in the sky: the godlike genius of scott walker
rate the coming of bill 3 of 6 stars
play the album alas y raíces by dave pybus 
what movies are playing at the closest movie theatre
add  michael balzary to mujeres y hombres y fiesta
what s the weather forecast for the area neighboring ks this autumn
find close by films with a movie schedule
is the forecast colder in idaho 1 second from now
play music from the year 1979
play some music from 1995
book the fry bread house for seven in olive
i give the ways of escape chronicle zero out of 6
show me the atrocity exhibition
can you add a tune to my jazzy romance playlist
show family plot
tell me the weather forecast for huxley  ms
play shadowplay by dana on deezer 
can i get the showtimes for man in blues
find movie schedules 
can you please search ellington at newport
what is the cloud coverage in my current place
what time is the man who dared playing at the movie theatre
list the movie schedule for regal entertainment group theater 
find the schedule for metallica through the never 
book a spot for 8 in hungary on february the 14th
is it warm in sierra blanca now
add xiang xiang album to my madden nfl 16
will it be warm here in one hour
rate this textbook 3 of 6
add the tune by cassie ventura to my genre bender playlist
book a reservation for city tavern in long bridge
add deus deceptor to dance workout
can you get a table at the triple door in district of columbia for me and deborah vasquez 
can you put this tune onto latin dance cardio
put beside you in my spotify orchestra cello playlist  
add what if we were real to my ultimate 80s playlist
rate the astonishing life of octavian nothing  traitor to the nation  volume ii: the kingdom on the waves series 2 points
what s the weather like in groesbeck
give me the local movie times 
please find the infrared riding hood tv show 
add this album to my hot house playlist
play llegando a casa playlist
what is the weather forecast for colfax  senegal on 1/1/2031
how cold is it going to be in san marcial  ak in one second
play miguelito top charting album
on april 2nd what will the weather be here
will it be warm in zambia at 9 pm
will it be warm next winter in smolan  burkina
play a 1991 song by anila mirza
table for 1 please
play some music on vimeo
i need a booking for seven people at metropolitan museum of art 
what movie house is playing something for the birds
play music from 1989 by maya 
add appreciation day to my folksy love
find the great hydration  a tv series
what cinema is the closest showing movies
is young policemen in love at the local movie theatre
book a restaurant in northern mariana islands with kristine  alisha and florine 
show the matrix revolutions
what is the weather for cormorant  me
can i get the movie times for fox theatres
i would like you to add now the hits of winter 2008 onto my ntc studio sounds playlist 
add butterfly house to nu metal
play nick hexum latest album
play me a song on pandora
the ultimate 90s needs avant que l’ombre à bercy in it 
is hollows grove playing at any movie theatre at ten pm
add my album to this is al green
play henrie mutuku album from 1957
book reservations at phase 1 in la jara
rate sandworms of dune three out of 6 stars
get me a table for 5 at a restaurant which serves south tyrolean 
put once bitten twice bitten into the pulse of americana
i would rate this chronicle a value of 1 and a best rating of 6
add doing all right to string theory
play the song s f  sound furniture
add a tune by louis wolfe gilbert to my cleaning playlist
i would rate this essay 2 stars and a best rating of 6
play shinehead s music from the twenties on slacker 
play some happy gabber 
play dj shadow s a love hate masquerade 
i need a restaurant booking for 2 people this month at a indian place in climax springs  new mexico 
will it be hotter on oct  the 20th in massachusetts
rate my current book 1 out of 6 points
can you add danny carey to my masters of metal playlist
add morten harket to this is puccini
play the greatest 1966 album out there
is there a movie theatre showing last cab to darwin today
find the novel the thunder rolls
can you play me songs from the estado de ánimo playlist
add paper doll to the power walk playlist
what time is the phoenix project playing
what will the weather be within the same area of weir farm national historic site
play the album pressure cracks with netflix
ticket for the perfect man at dickinson theatres at 10 a m 
what s the weather far from jarbidge
current album gets a value of 0
i give benson-meditation 1 out of 6 stars 
find head start
where can i get movie schedule
i need to find the saga trail of the yukon
is it warmer now in wetumpka  mauritania
play hardcore music
play me a song from 2008
play the artist tei last concert on netflix
find a novel called kiss me licia 
book a reservation for 1 at pm park  clear lake  iowa in mongolia in 1 hour
can you find me the dicey business tv series
what is the weather of la at 4 pm
give 2 out of 6 stars to current chronicle
find a movie schedule in the neighborhood for films
the law of dreams gets a low rating of one
what time is the rumyantsev case playing at the closest cinema
on april the twelfth in somalia is the weather chilly
play some psychedelic rock 
play itunes album mondovisione
find me  i am mariah… the elusive chanteuse
will there be sun at four pm at runkaus strict nature reserve
add track by fleetwood mac to lakeisha s playlist todo novedades
book a spot for krista  yolanda and i in new mexico
rate my current book four points out of 6
add roots of the outsiders to blues roots
i d like to add this album to funtime 
i d like to watch the details at the cinema
find a tv series called cocktail kings 
can you put this tune onto erin s house afterwork playlist
is it going to be hot in luambe-nationalpark
look for the itv com song
show creative song ufo senshi dai apolon
show me movie times for two a m  at any nearby movies 
find the movie schedule for cooper foundation 
will it blizzard today in sint maarten
what is just like in the old country
i d like to play the song in a reverie
book a spot that is faraway from the municipal borough of farnworth in 16 minutes
is it going to be cold 21 weeks and a half from now in salemburg
book a restaurant with internet in ny for four people 
folk and fairy tales gets 1 out of 6 points
add this track to my zen focus playlist
book a spot for six friends
add the tune to my women of latin music playlist 
show creativity of wild about animals
give three out of 6 points in current essay
is it warmer in lothian island wildlife sanctuary
find the schedule for close by movies 
play iheart
weather for my nearby current location
tell me the weather forecast nearby my current location
play some theme songs from the fourties
will it be warmer in 20 minutes at natural park of las batuecas
what are the movie schedules for the loews cineplex
does amc theatres have movie schedules out
add fuzzy logic to latin dinner
rate this textbook 2 stars out of 6
play latest george ducas music
find me a table for a cafe during my guinea trip for one 
what s the weather forecast for oman 2 months from now
need a table within the same area as beach 105th st for a party of 6
reserve a table at bear hotel around finsbury park
add this song by chieko ochi to the drum & breaks playlist
how much hotter will it be 40 weeks from now in blue island  north dakota
show creativity in all nudity shall be punished
find the book a glorious way to die
what will the weather be in tajikistan on dec  twentieth
play music by deenanath mangeshkar
add 100% te ljubam to the hit remix playlist
is the angel of vengeance – the female hamlet playing at the cinema at 6 am
i need seats for six at a pub on january 15th  2030
play some chant from 1974
look up the hard to handle tv show
tell me when it ll be cloudy in woodport
i want to add an album to noreen s endorphin rush playlist  
what is the weather forecast for boden
book a table for mindy and angelita at a restaurant which serves café liégeois 
book a table for three at 0 am at a bar with wifi in schuyler lake
lets go to the rainforest cafe that is in the same area as 135th st
book a table for 1 somewhere in andorra
book a spot at a steakhouse with internet
add the album to the fantasía playlist
add the big mama thornton song to cassie s punk rock workout playlist
rate this textbook four of 6 points
locate the koi to senkyo to chocolate television show
what movie schedules at consolidated theatres
play 1990 tunes on groove shark
open the canciones del recuerdo playlist and play songs
find unfinished portrait of general bonaparte
rate this album only three points 
play paul landers  o rio  a cidade  a árvore on slacker
i want to see the trailer for australian economic history review
put this tune onto my party through the decades playlist
tell me the weather forecast one second from now in barnum island
show me a video game made by tmpgenc 
rate call for the saint 1 out 6 points
what is the weather looking like right now in wy
play music by charlie adams from 1954
what will the weather be at mu ko phetra national park on administrative professionals day
when is the great question playing at the closest movie house
how much rainfall is there faraway from douglass
play bob hilliard top-twenty music
what s the weather in stone mountain kentucky
play brotherhood by ock joo-hyun
play breed the killers on itunes
book a table at a pool bar
find a novel called on the case with paula zahn 
add ilse delange to my journey playlist
find ek boond ishq 
i need a reservation for 02:53 at hotel arctic in state road 
will it be cloudy by five pm in gobler jersey
play a movement from 1974 
play chant from freddy fender on iheart
give five points to an ice-cream war
what time is trouble every day playing
is there weather going to get chilly when i get close to new york
book a reservation for a party of six in the same area  as metropolitan borough of bethnal green
find in the line of duty: street war 
are any animated movies scheduled for release in mann theatres
add tune to composer weekly pauline oliveros playlist
will there be rainfall faraway from uganda
find movies around here
rate equal affections one points
show movie schedule
find a show called the inheritors
find a book called the cia world factbook 
book a reservation for 6 in belle plaine  ne
please add this track to my weekend list
when can i see we and our mountains
is it forecast to be warm in bosnia and herzegovina
please show me the films playing at loews cineplex entertainment 
rate the current essay four of 6 
play me the most popular lillian hardin song on itunes
open pandora and play udhreko choli from chowdiah
play 2gether by jade puget
show me weather forecast in clontarf  ky from 4 hours from now 
can i watch flower and snake at movie house in one hour from now
play me the song aap to aise na the 
play the top nineties melody by gus g
what s the weather going to be like around lewis and clark trail sixteen hours from now
book me a table for nine at a bar with parking in qatar
add tune to bedroom jams
weather in grey eagle on feb  fifteenth  2034
i need a table for 4 at a restaurant around 0 am 
add this artist to fifa 17 soundtrack
i would rate the animal liberation chronicle 0 points and a best rating of 6
can you find me the restless natives
i need the weather in hubbardston  will it be chillier
add the field album to my romantic evening album
add the frank beard song to the soft pop hits playlist
play that new song from 1970
i rate the mathematical magpie chronicle a 0 of 6
add a tune to my playlist guest list polygon
play some dave pearce 
book a restaurant in west hattiesburg for 0 o clock 
what is the forecast for here at tea time
give 5 out of 6 to this album
what s the nearest movie house showing films
book a popular bar in chowchilla
i need a table at a czech pub at seven
add gareth gates to my autumn playlist
i need a reservation for the berghoff in jamaica in 18 seconds
show movie times in north american cinemas
play music from 1964 
play any music on spotify
rate this essay one out of 6 stars
book a reservation for seven people at a steakhouse in kenya
add the artist to the nuclear blast novelties playlist 
is the forecast stormy this afternoon in maryland
is it going to be colder in botswana by 09:30
play blues on vimeo
add the album the martin garrix show to my playlist
where is the wilderness trail playing
find the schedule for films in the neighborhood 
when are the movie schedules
i wish to rate zero points out of 6 to the crack in space 
add dear hearts and gentle people to he tokyo rising playlist 
book a table for five at the training table 
turn on google music to play 1991
can you play some music from my road trip album
add zos kia cultus to the this is philip glass playlist 
what animated movies are around here
book a table near bienville for pioneer day
rate current essay 1 stars
i need a reservation for a pizzeria nearby vigus
show the family from one end street album
find a television show called twisted 
add jovanotti to punk español
will it storm in north sioux city al
play some sixties on netflix
play play lodge by alkabli on lastfm  
what s the forecast for nearby the current position
will there be a snowstorm in william b  ide adobe state historic park
put the song playing on laverne s rapcaviar playlist
show creativity of video game labyrinth
read the novel friend: the great legacy
will it be chilly in fiji at ten pm
can you play some andrew cash music on slacker
will it be chillier in portugal in one hour
what is the forecast for assumption of mary in in for the weather depression
is it going to be chilly in belarus
is it going to be snowy in concord  utah 
play movement music from 1954
what is the weather in hadar
play twenties from ken floyd
add jacob hoggard to my get going playlist
i want to see dead calm at the closest cinema
play some seventies songs from joseph genaro on google music
play some good movement music by brian littrell from around 2001
i want to rate the children of this earth chronicle a rating value of 1 and a best rating of 6
what is the weather forecast for tanque
give me the movie times for movies showing in the neighborhood 
find a video game called the last american virgin 
where is picture everybody wants you
i d like to hear the song impractical jokers uk
will there be wind in as
is it going to be freezing at tea time in michigantown  ks
i would like to book an american samoa restaurant for 8
add wes scantlin song to my autumn
play some papoose from 2003 on youtube
rate this novel 4 points out of 6
is it sunny 1 second from now in the pitcairn islands
play the lamentation of cloris
rate the current chronicle book three points
book a table at the irma hotel in mount repose
find a reservation for a restaurant in hong kong for seven people
rate this essay a 3
book a restaurant with parking for three people 
give the current essay five points 
play something off google music
book a table for kristina and teresa in 1 second 
please give me the forecast for branton
i d like to eat souvlaki fast food with a party of two
play lighter by pamela jintana racine
what is the closest cinema with animated movies
rate the current book three stars
i d like to give the harder they come two points
would you put hammer onto the lunch playlist
what is the pw forecast for stormy weather
add this album to my party with friends
play top martin solveig on deezer
give northern lights audio 5 / 6 points
what are the movie times for amco entertainment
i need another tune in my legendary guitar solos playlist  
will it be chilly in cistern
find wild at heart
book a cafe in romania
what will the weather be like at two o clock in el salvador
play any track by flame
what is the weather forecast one minute from now in macao
book a restaurant for me  angela and mercedes in cimarron city  colorado
add sheila e to my i love my neo soul playlist
find the schedule for the tale of sweeney todd at seven o clock 
play 2012 symphony music by nardwuar the human serviette on netflix 
i want to book meriton grand hotel tallinn in new jersey for four people 
find a saga called the life of riley
add ramble on to halloween teens
play a twenties concerto from roger taylor on deezer
show the forecast for moonlight beach at 10/4/2021
add exorcising ghosts to joy s thrash attack playlist
wish to hear a concerto by diplo from 1952
rate the book the egoist five out of 6
i d like to watch the tv series sailor moon supers: the movie
book me a rustic inn restaurant for 8 members at nappanee
look for the novel behind closed doors
use service vimeo the genre slow rock
book a spot for 8 at the kitchin on october the 13th  2039
what will be wind speed in tiplersville  south sudan
book a restaurant close to grant av
book a table for 9 people for four pm in johnson 
what s the forecast for north amityville
rate this book 3 out of 6 points
play symphony music from joe dolce
play justin broadrick s music on slacker 
add the album to my sleep playlist
can you search for twilight is gone
add dj clay to my canciones del recuerdo
rate this album three of 6 points
gwen carter and i want a reservation in the dominican republic
book a table in cottondale not far for in two hundred sixty nine days 
where can i find the game skip to the end
add grim skunk to duetos
i d like to see movie times please 
play music from the seventies for me  
how is the weather in birta
give this novel four out of 6 stars 
open lastfm and play a voluntad del cielo from wax
tell me when it ll be hotter here
show video game and the quality of life
what will the weather be in meeres-nationalpark insel bastimentos at twelve pm
add this tune to my party ¡fiesta
play fourties soundtrack from hamish maccunn
i would like to rate tar: a midwest childhood a value of 1 and a best rating of 6
show creativity of the oxford companion to beer tv show
give under the sign of saturn a four out of 6
play music off youtube 
can you reserve a table within the same area as the american samoa for me and my mom
show me the saga my darling
11 seconds from now find a cinema with first monday in october
give one out of 6 points to high wizardry
i want to bring antoinette  christine and caitlin to get bread at a restaurant in faraway connecticut
i need to book a pub in cammack village wyoming for a party of seven
add 157 riverside avenue to leticia s animal humor playlist
i want to watch the tv series rat pack
what is the forecast for lille in norway
add por tu maldito amor to my orgullo gay
play some origa on google music
find the movie times for nearby films 
book a spot for one at a bar in seabrook
i want to take me and my momy to eat in flossmoor
show creative last light
add this track to alternative route
rate the current essay 2 stars
add this tune to my it s a southern thing playlist
find fragile frontiers: the secret history of mumbai terror attacks 
play slow rock on lastfm 
help me find where the wild things are
add artist to latin pop hits
add artist to playlist epic gaming
i want to listen to the song the loving spirit
play the charlie hunter theme off of last fm
i need a table for 7 people at a bar that specialises in being a protein bar 
when can i see dinosaur from the deep
is it going to rain at my current position
add baby lemonade to poetry in their own voices
find films with movie schedules that are nearby
how is the weather going to be in gambia in a week and a half
will it be sunny a lot in honduras next autumn
i want to see king of the river in the nearest movie theatre
find hope & other sins  a tv show
rate this essay five points
play ecstatic
play chance of a lifetime on zvooq
book a neighboring coffeehouse with internet in shingleton 
let me get the forecast in allardt  canada 
what is the movie schedule at caribbean cinemas
book a spot for six in greece
where can i find the picture the japanese lovesong near me
play noctámbulo playlist
movie schedules at southern theatres
show creativity of your body above me
add this artist to my pop punk s not dead
are there any animated movies playing in the neighborhood
add zamiast burzy to phunkadelic
one hour from now what will it be like in cholame rhode island
rate this essay zero stars out of 6
show movie times at cinemark theatres
find the angry birds movie
add madchild to electro latino
i would like to rate the hundred-year christmas four stars 
rate the current textbook 4 of 6
look for a photograph of tailwind
will it snowstorm next week in west winfield finland
give zero / 6 stars to this album
add an abrar ul haq track to my playlist soul lounge
show me the lights out saga
is convoy busters playing
where is the beach of lost children playing
play dansevise by ebi on groove shark 
will it be colder 1 hour from now noew in east dundee zimbabwe
i want to give the current album 2 stars
for the saga the end of a family story i give 0 stars
find a trailer called storm center 
look up three fantastic dances
show the late great townes van zandt
for mirrorshades i rate it three stars
what movies are showing nearby
put slimm cutta calhoun on my songs to sing in the car playlist
help me search ufc on fox show 
rate the series the quantity theory of insanity 1
play bliss torn from emptiness
play the movie i want my mtv: the uncensored story of the music video revolution
is the weather hot in miller house nv
find fox theatres with the caretaker
i d like to see the book city university of hong kong law review
play music from 2012 on netflix 
play a song from 2003
this current textbook deserves a rating of 3 points and a best rating of 6
i need a table for 4 in florida
show me the films at the closest cinema
i need a table for nine at a restaurant in pelican bay serving chips on december 6  2031
play a ladyhawke record
what is the weather forecast this week close-by my current position
find a video game called merry andrew 
i am giving finding chandra a 2 out of 6 rating
is the cycle playing at consolidated theatres
rate this book 3 of 6
i d like a table for 7 at ten pm at a cafeteria in al that serves malaysian food
book a table at jacob wirth restaurant for 8
can you play a song from the fourties by george martin
what will be the temperate in tyresta national park on 7/18/2030
add joe hickerson  to my jazz – classical crossings
add my belgian rose to my evening list
play liubi  liubi  i love you by farah asyikin binti zulkifli on netflix
tell me the forecast for breakfast at miller s cove
find black mirror iii: final fear 
what s the weather going to be like at my current spot at 7 am
give 4 out of 6 points to this book
book a restaurant in medford lakes on sep  8  2033 for essie  tonya and i
i need to book a pool side bar  for 5 people 17 weeks from now  distant from here at mountain lakes 
reserve a table for 8 in neighboring hitchland 
what will the temperature be like at fort point  san francisco the day after tomorrow
play in every dream home a heartache by vincent paul abbott 
book a restaurant in three points
what s the closest cinema playing six days: three activists  three wars  one dream at sunrise
open youtube and play nanana from massimo altomare
add zion golan to my signed xoxo playlist
what animated movies are playing at the closest cinema
give 0 out of 6 star to religion and dharma series
give the abstinence teacher 4 out of 6
play the top five songs by gad elbaz
rate this textbook five points
i want to give the current saga a five
what is the new caledonia forecast for bagnell on sep  the 5th
show the movie move any mountain
i d like to see movie times for animated movies playing in the neighborhood that are starting now 
incorporate ayumi hamasaki arena tour 2009 a next level into my música libre playlist  
play a song off ian stuart donaldson s nature nurture album on itunes
find a video game called the mysterious castle in the carpathians 
play water under the bridge by hariprasad chaurasia 
find a game called dynamite warrior 
add died to the todo latino playlist
find a pub for me in fm
rate tropic of capricorn two stars
is the day of the beast playing at three p m 
what s the weather forecast for sidnaw at 20 o clock 
what time is swarna trishna playinh at loews cineplex
is traffic at the movie theatre
find a table at a restaurant in bynum ca at 09:59 pm
add this track to the 70s smash hits playlist
find the new legend of shaolin video game
rate this current novel 1 out of 6 points 
what animated movies are showing in the area
show creativity of mind chaos
what s the weather forecast for glade park on july twenty-fifth  2033
add daniel zueras to lush vibes
what is the 7 a m  movie schedules at amco entertainment
is it rainy at the edward l  ryerson conservation area
add an album to the días de frío playlist 
play music from 1958 
book a spot at a taverna with internet in mississippi
what s the weather going to be like not far from east timor
will it get warmer in czechia
where to buy unarchigal
add licorice mckechnie to just dance by aftercluv
add an album to playlist emily dickinson
play the playlist tropical morning on pandora
play some music by mutlu
what cinema is playing the white stadium
give this essay a 2 out of 6 
tell me when it ll be hot in melbourne  nj
book sot for one at restaurant with wifi
book a restaurant in botswana for seven people 
book a spot for five in the same area as 72nd st
i want to eat breakfast at the green restaurant certification
give the current chronicle 2 stars 
find wild solutions  a saga
rate this novel four stars
i need a reservation in steele city 
add tapper zukie to the all out 00s playlist
the half-life chronicle deserves 3 points
give the current series 3 points
is there snowfall nearby american samoa
i want to find a restaurant that has a table for two at 5 am
will it be cloudy in lenzburg  papua new guinea
add album to acoustic spring
play an album from 1987 
i d like to watch animated movies at national amusements
find by title champagne showers
give modern glamour: the art of unexpected style three out of 6 stars
where can i find the tv show earth defense force 2025
book a spot for me  reyna and maxine at a taverna on monday
rate the current essay a 1
rate the previous essay 1 of 6 stars
look for the tv series all around performance horse weekly
me and my mummy want to go to an indian bar next winter within the same area of cortelyou rd
i want to book a doughnut bar in american samoa
i want a song by john schlitt in the bajo las estrellas playlist  
add the crowd to corinne s acoustic soul playlist
what s the weather in macclenny
book a english pub for me  belinda and dena close-by syria next dec 
add the tune to bandas sonoras
book a spot for seven at a brasserie with ginestrata
add priscilla to my playlist classical dance music ballet & beyond
add album to princesas indie
find films in the neighborhood
what is the weather one minute from now in ocilla
what is the midnight forecast for argentina
i give warheart 5 stars 
rate the current novel two points
i d like to eat at the oyster bar for a party of one that has internet
which movies are playing at b&b theatres at 2 pm
i want to add the war is not over to geraldine s pop punk powerhouses playlist
what animated movies are playing at imax corporation
where is bernardsville
give the current novel 3 stars 
play southern rock tunes
what is the movie schedule for movies close by
can you get me the starcross saga
can i see movie schedules for movies this evening in the neighbourhood
where is the man with a cross playing
rate this album book zero out of 6 points
book a table for 10 people on bunker hill day at a food court which serves spätzle in monaco
marcia carolus rex should get added to my women of sxsw playlist
search for the show champagne showers
i need to find the work brotherly love
give the current essay five points / 6 
weather for ringold
use itunes to play a soundtrack from the year 1954
add dickey betts to my throwback thursday playlist  
what s the weather forecast for mi for august 20th
is there a blizzard in stonewood
show me a textbook with a rating of 2 and a maximum rating of 6 that is current
when can i see a handful of dust in a movie theatre
find a reservation at boone tavern for 4 people in 10:24
book me best joint restaurant for 2 members at american samoa today
play me a seventies ep
give this album a rating of 4 
i want a table for 9 in loyola at gus stevens seafood restaurant & buccaneer lounge
please add this artist to my zen focus playlist
can you search miracle in the rain
add this track to my playlist named trabajo relax
please book me a table for 1 person at a brasserie 
play the edge by deezer on vans warped tour compilation 2003
play angela winbush ep that is popular
i want to listen to the song shamus
play track cabbage by keiji haino
find a photograph called between the days
i d like to hear the song in a reverie
what will the weather be like at my current spot on january the 19th
play some gangsta music
mark the final battle score two out of 6
book laurelhurst theater for 8 people  
give this book 1 stars 
play a chant by mike jones
find the sentimental bloke novel
play some paul stookey from the sixties
rate this novel 1 of 6
put lullaby of birdland onto fusion fest 
play live at leeds
i want to book a restaurant for ten this summer
add this artist to the playlist called fusion fest
add this song to the top 100 indie tracks on spotify playlist
what are the movie times for films playing in the area
book a restaurant for november 19
play a theme from walerij leontjew
show the ancient art of war picture
rate the bok series preparedness 101: zombie apocalypse two for 6 stars
which animated movies are playing at the nearest movie house
find naomi & wynonna: love can build a bridge
show me the television show called south california purples
please add liberty forever to the road trip playlist 
i need a restaurant in indonesia for 7
please rate this book and album 4 to 6 stars 
get me a picture about sardonic wrath
i d like to watch demolition man at 11:09 pm
i gave the current book a three of 6
i d like to find the limited lovers novel
play easy listening
search for live forever: the rise and fall of brit pop tv show
what s the weather looking like in macy
is it warm in west monroe
look for the no bigger than a minute soundtrack
is cradle robbers playing at the nearest movie theatre
i have a party of four in japan and need a reservation at rimsky-korsakoffee house on aug  the 3rd 
show creativity of the greatest movie ever sold
can you play a sonata
i would like a table for jacqueline wilson and deanna at david carpenter house in uncas fm
i want to hear the soundtrack to the platinum rule
i want to book a pizza restaurant close to astor place for nine at 3 am
is it going to hail in mount san jacinto state park
give me some movie schedules 
find a table for two in a place not far in culdesac
where can i find the game a little bit of mambo
i need journal of pediatric oncology nursing  help me find
can i hear a song by david hodges
is hercules and xena: the battle for mount olympus playing at the closest cinema
book a spot for one
rate the current novel five of 6 points
who was the artist who did the painting called spyro 2: season of flame
show video game name find the colour
add this tune to my guest list gamesradar playlist
open netflix and play david frizzell
play me a song from voices & images
play music by bonobo
i want to add black ribbons to the i love my neo soul playlist
book the oriel in allison for a party of four 
i d like to get 4 seats at a restaurant 
find time for ace of the saddle
book indian food at a highly rated pub for 1 for 02:22 pm
can you get seating for 1 person at a cafeteria in pauls crossroads
play twenties on groove shark
is there any predicted snowfall in 2 months in vandalia  el salvador
what time is tommy and quadrophenia live playing at marcus corporation
this track should go into my playlist called this is beethoven
need a table in serbia and montenegro on apr  16 for a party of seven
this is rated 5 out of 6 for an essay
show me the picture nothin
i want to go to an outdoor cafe in pioneer day
will it be freezing within walking distance of alaska
show me the movie schedule for loews cineplex 
play a top twenty sort by akinyele 
rate the book a girl  a man  and a river a five
play chantal kreviazuk  sister ray
i would like to rate the current chronicle 4 to 6 stars 
is there a program about the last flight
find andreas hofer at elevenses
find the game endangered species
book a table at laurie beechman theatre for a party of 4 in utah
i give 0 points to the book the eleventh hour
play a top ryuichi kawamura chant on groove shark
add kevin cadogan to the 80s classic hits list
find the tv show when i was a boy
add the artist jamie t to hallie s winter music playlist
add my favorite track to baroque 50 spotify picks
is sheikh chilli playing
add bonobo to queen playlis
i want to eat a a brasserie that serves muffuletta  where can i get a reservation
programming the universe is average and deserves three stars out of 6  
i need a table for 4 in pelland
need a booking for 6 in ok for the city of boonton
open pandora and play the top five melody by hanna sjedokowa
i am rating this book named the infinite man 5 stars
will it get warmer in berkley
play robert fripp sound track on pandora
this book gets out of a total of 6 stars only 1
what is the weather in silver springs western sahara
play who knows where the time goes by grigory leps
find movie times
what are the movie times for animated movies playing close by
add every song is a cry for love to my playlist soul  n  the city
show weather forcast here at 19
what are the movie schedules for animated movies close by
add 9th inning to my bossa nova dinner playlist
will it storm in kinder russia
what s the weather going to be like this autumn in ca 
book a table at a restaurant within the same area as the octagon  christchurch in allentown
show weather forcast for t h  stone memorial st  joseph peninsula state park on one hour from now
play randy castillo s music from 1952 
can you play a sammy fain ep
what time is dark world showing at consolidated theatres
play some grunge
include brandon paris in the metalsucks playlist
book a restaurant for a meal for 4 people 
the hot house playlist needs another album
start up my independent music monday playlist 
is it warm here now
book in west palm beach for glenda  lois and tamra at a nearby restaurant serving puglia
book a bar table for tonight for rajasthani food
find the picture music is the message
what films are showing around here
i want to see breathless
showtimes for medal for the general
where can i book a table close to me in moon run at sixteen o clock that will take three people
book a table for eight this month in maldives 
i want to find a restaurant to eat at in westernport 
show the movie schedule
what s the weather in taiwan
show the movie schedule
i d like reservations for me and my grandkid at a top-rated restaurant that serves molise cuisine in pa 
find if these walls could talk
play mohammed abdu from top 20
add viktor tsoi to my sweet soul chillout playlist
add tarja turunen to my lo mejor de radio 3 playlist
i m wondering what cinema is playing peters baby 
find me the book the van dyke show
book a restaurant within the same area as saratoga av
i want a table for 9 at the taverna pub
find the schedule for films at the closest movie house 
go to after dusk they come 
find the game titled iparty with victorious
play a tune from 1962
can i get the movie schedules for goodrich quality theaters
please play short and sweet by teyana taylor from my itunes 
what time is always brando showing
rate the cherryh odyssey three of 6 stars
can you play a song off an album by shirley horn
book a table at central grocery on mar  22nd  2020
book a brasserie in the falkland islands for this week 
book a bar in holtville nd for 7 people 
play the necromancer
i d like to watch films at the nearest cinema at 8 am
i need a table for nine in atlas in 1 second
want to know the blizzard weather condition in lake catherine
give this current novel a 4 
book a joint in sixteen minutes  for 9 
book a table in fullerville at a highly rated bar
play a melody from leigh nash using lastfm
book reservations at a restaurant in mi seven weeks from now
what time are the animated movies starting at the nearest movie house
add tune to my hot 50
add this track to the playlist named cali fire
list movie schedule
what animated movies are playing at the magic johnson theatres
give wannabe: how the spice girls reinvented pop fame 2 points
use spotify to play greatest songs from kailash kher
rate the current textbook 4 of 6 points
rate this novel 3 out of 6 points 
make me a reservation for elvira and i in brazil
add this artist to my 80 s party
find a novel called matching dreams 
where can i find the tv show metabolights
show me convicted
i give the previous album a 4 
what are the movie schedules for great escape theatres
can you play the newest record from 1966 by tony lee
play 1977 good track tunes
rate the saga in mortal hands five out of 6 stars
use slacker to listen to seventies music
play music from jeremy taylor on the album dormi amore  la situazione non è buona on groove shark
play 2004 on pandora
i want to hear that tune from 2010
make me a reservation somewhere near here for me and my step brother by adeline s apartment
add giancarlo erra to my guitar hero live playlist
find the press of atlantic city movie
play the album everybody happy by lee aaron
when s fools for luck showing
play some fourties music on vimeo 
play the good sort of 1992 theme music by layzie bone
find me the novel  between the rivers 
rate teh current series  a 2
add a track to my list made in puerto rico
which animated movies are playing in the neighbourhood 
book a spot for ten in ms
play rocket queen on itunes
table at nankin cafe fr one
find the deathsmiles ii soundtrack
add a tune to my sleep sounds list
rate the beyonders: a world without heroes saga 1 out of 6 stars
where is beyblade: fierce battle playing
play my fusion fest playlist on youtube
i want to give the chronicle what we talk about when we talk about love 4 out of 6
can i see the the painting another life   another end
book a spot for 10 in the same area  of inwood - 207th st
give this book a rating of four out of 6 
there is fog weather in grand lake nebraska
search for the adventure of the blue carbuncle
play jazz music by zvooq
please show me the movies playing at amco entertainment 
can you please find the jack johnson en concert picture
what time is a movie in the neighbourhood
show me the when your heart stops beating photograph
give this album a five out of 6
will the weather be cloudy at 0 pm at my current position
please help me search the banker television show 
find mysterious castles of clay
i want to hear something off fist for fight by rushton moreve on youtube
rate the current textbook a 4
play wanted by erykah badu
i want to book reservations for 8 at an indoor restaurant 
whats the temperature not far from valley of fire
i would give this current chronicle a value of 4 and a best rating of 6
what are the movie times for movies in the area
rate the chronicle tarzan the terrible a 4 out of 6
find the collision in black painting
play a jack lawrence concerto
rate deception a one
add the singer maxine nightingale to the spanish beat playlist 
what is the forecast for iceland and danville for rain for nine months from now
play monie love tunes on google music from 1984 from her song list
i d like to see jack
play song softly
find a movie schedule for 12 hours from now 
add a norma jean tune to the soul revived playlist  
show me the novel all i need to know
play the greatest soundtrack by jesse harms 
find phalcon 
is there any snowfall in shubuta
find the album follow that camel
need book a restaurant for this autumn in illinois
what time is bhoot returns showing at douglas theatre company
for this series the magical revival out of 6 give it a 5 
add track to my life s short play fast playlist
what are the selections of films that are being shown at cinemark theatres
play a song from the thirties on zvooq
i want hear some junior murvin off of youtube
play some theme based music from the thirties 
rate this novel a two
book me seats for 6 at a restaurant in wv in one second
book a tavern in rhode island that serves saucisse 
find a book called tron: legacy reconfigured
put this track on the playlist with the name roadrunner rec new releases
play the album shooting silvio by dave sabo
show creativity of doomsday comfort
find movie schedules
what films are on the movie schedule for ten at a close by theater
rate the current album 2 out of 6
will it be warmer in my current position 
i m wondering if you can give me the movie times for films in the neighborhood 
book a bar with mediterranean food for three people
i d like to eat at a restaurant one minute from now that s highly rated
is it going to get windy today in tunisia
is it going to be chilly on 12/13/2025 in haugan pakistan
can you pull up the american music awards of 1975
add artist to laundry
what are the morning movie schedules for movies in the neighborhood
rate the current book five of 6 stars
i need to book a restaurant in burkettsville in 2 years  for rhoda adams  roxanne and i
add this tune to my playlist titled uncharted 4 nathan drake
add harlow wilcox to hip hop club bangers
will there be a snowstorm in eight months at chattahoochee river national recreation area
make reservations for me at a taverna in hong kong
book a restaurant in montverde in marshall islands
book a table for 4 at fish express
i want to go to the freight house in gabon
the spring classical playlist needs partners in crime added to it  
show me the movie schedules for movies playing around here today 
i would rate this album 3 stars
rate the book the varieties of scientific experience two out of 6 points
weather for carlisle gardens as
rate the current book a four
what is the weather forecast in brunei
find the book bad day on the block
rate the anatomy of melancholy 1 stars
play some good music from 2012 
i d rate this novel at 2 points
find me the painting fallen sanctuary
i would like to add to my plalist  visjoner onto the old school metal one
where is the incite mill playing
play some the lady is a tramp from timour moutsouraev
play the song si no te hubiera conocido by haidar salim
play a native us song on last fm
find the movie schedules for great escape theatres 
when is up the yangtze playing at goodrich quality theaters
play junun by noam kaniel 
play the music genre synthpop
rate the keys to the white house a zero
play some nineties music on pandora
what will the weather be like in india at 02:55:25 am
for the book the mirrored heavens  i give one of a possiable 6 stars
can i get the showtimes for films close by
find the schedule for better this world at a movie house 
show me the television show the science of breath
book a table at black rapids roadhouse in antarctica for nine
play foundling by jean grae on vimeo 
show me the book playlist: the very best of dolly parton
add go to the metalsucks playlist
what is the movie schedule for movies close by
is it cold in north carolina
show movie times of regal entertainment group
show creativity of construction project information committee
play ray davies on iheart by only hit it again
find a book called follow me
i d like to see spyforce
find me the picture live in paris 1975
add spanish harlem incident to cleaning the house
add this maksim tune to trad folk
will there be a snowfall here in the neighboring areas
what is the movie schedules for animated movies nearby
can you play me something from the eighties on youtube
play some eighties music 
does red e toby nemiciamici start thirteen hours from now
is the king of the kitchen playing in fifteen hours
book mars 2112 in rwanda for 4 people 
what films are at century theatres in twelve hours
include hermann baumann in my texas red dirt list
what time is atlantis  terre engloutie playing
play richard thompson from the thirties song book
find cascading waterfall
i m giving 0 points to a new lease of death 
find a novel called under blackpool lights 
play an asha bhosle song from around 1964
peter and the piskies: cornish folk and fairy tales only gets a three out of 6  
book a reservation for a popular restaurant in federated states of micronesia
show the trailer of deadly skies
how do i watch the television show counting the rosaries
find me the album the weed tree 
i d like to see the photograph the light
can i get the showtimes for films at malco theatres 
find the nearest movie theatre with the witness chair
find the life of riley  a photograph
find films closest to a cinema
book a spot for six on october fifth in mineola
please book a restaurant room which serves hangtown fry dish in jagual 
dragon age: the stolen throne gets 1 points
book in southern shores for 8 at ariston cafe
is there rain in nauru at 6 am
give 4 out of 6 stars to the nightmare lands
play a 2009 concerto on deezer 
when will the weather be temperate like it is now in stansbury park in tuvalu
what will the weather be like on feb  sixth  2024 at blanco state park
show me a picture called heart like a hurricane
book a spot for 8 at a popular taverna
find a photograph called cold weather 
rate a division of the spoils 5 stars
where to watch show extremely live
i want a table for 5 next fall om curacao
will it be temperate in tanana france in a week
what is party all night
please tell me the movie schedules
add paul franklin to my the bachelor party
please book me a table at a food court faraway from saint kitts and nevis 
can you find the show the dumping ground survival files
play some music from the thirties 
can you get me seating for a party of 4
rate the previous textbook a 4 out of 6
add this artist to the this is dirty projectors playlist
my sons and i want to dine at the water club in georgia
book a food court indoor at penermon for my step father and i
play best fourties from david izquierdo on album
show me the video game the stillest hour
bar restaurant for november the twelfth  2030 that is popular and for a party of ten
will it be sunny one hundred thirty five days from now in monterey bay national marine sanctuary
book a table at a brasserie type restaurant that serves jain for a party of 8
find set the thames on fire for seventeen
find framing the early middle ages  a game
what will the weather be in deer river
play the widow of saint-pierre saga
book a brasserie that serves mezzes in iowa 
give this a four for the next series of points
let me hear the live from the ghetto album by beau jocque 
play music from 1969 on lastfm  
is the swan available to watch at the movie house now
is it going to get chillier at 5 am in trussville  bosnia and herzegovina
find the pop has freed us saga
play some fourties music from erin harkes
i need a table for 6 to eat at nearby in clinchco 
add artist to my texas red dirt playlist
look for all broken up and dancing which is a video game
add another tune to my verano playlist  
at 8 am i want to eat at the rosebud in the federated states of micronesia
will you play my nuestros 80 playlist
rate this novel 1 out of 6 points
please find the tv show  the dreamstone
the previous novel is worth two out of 6
add little walter to women of comedy playlist
what s the forecast for francisco  netherlands antilles around eleven pm
rate the loneliness of the long distance runner 0 points / 6
add my favorite artist to the focus now playlist
rate the odd angry shot five points
rate this current essay five stars out of 6 total
add philip labonte to women of r&b playlist
find me the novel titled fertile ground
will it rain in paisley
what will the weather be in the current place 1 minute from now
show the legend of jesse james novel
plays some akb48 on youtube
play some sister rosetta tharpe songs from the eighties
book a table for six at the cherry street tavern for january sixteenth  2024
play music from 1954
find me a table at a javanese brasserie
please play me something by new wave of american heavy metal
what film is playing at landmark theatres
i want to give the book heart and soul three stars 
book a spot for 1 at a bakery with crab cake not far from new jersey
find the schedule for tailspin tommy in the great air mystery 
add a new entry for mon beau sapin in lela s música libre playlist
rate this book four out of 6 points
please book a room in the river café restaurant  to accommodate eight members in andorra
put this tune on my playlist technical&brutal death metal 
rate my current novel 2 out of 6 points
what is the nearest movie house playing black scorpion
i want to listen to roger daltrey from the sixties on slacker
add how to my week end playlist
what will the weather be in wakarusa
add artist fabri fibra to this is earth  wind & fire
the current essay is worthy only of a 0 out 6 score  
need to book a table at a fast food restaurant for a party of nine on november seventeenth  2019
please play this is the day by brian robertson 
what will the weather be doing at midnight in brazil
play the top ten theme music from 1975 by tom baxter
weather for four weeks from now in oregon
add chas chandler to my aux cord privileges
this current album would get 6 stars or a rating value of 1
will the weather be okay in northern luzon heroes hill national park 4 and a half months from now
play music by paulinho da viola from 1965
i want to give the black cloud one points
play the soundtrack for the lord of the rings: conquest
play a top fifty track from the twenties
what movies are playing at the nearest movie house
what will the weather be here
play a 1977 record by bitty mclean on google music
i d like to watch all on the red at 9 o clock
where to buy painting target practice
look up the stars are indifferent to astronomy
rate this essay four
find a trailer called eurythmics discography 
add warning device to my mac  n cheese playlist 
what will the weather be in the current position on dec  23
find a painting called the other bank
please give me the weather for federated states of micronesia 
i give the penalty three stars
book a bakery with smoking room for nine in niger 
what is the weather like for fleischmanns  lesotho 43 weeks from now
tell me if it ll be hotter a week from now  in waxhaw
is the weather hotter in old furnace state park
give this textbook a 0 out of 6
tell me if there s a snowstorm in the forecast twenty seconds from now in holtville
add this track to punk rock workout
incorporate a roberto parra sandoval track into the cena elegante playlist  
add this song to indie hipster
find a novel called downward to the earth 
where can i find the sounds to consume album
play a concerto by thekra 
book a table at dillard house in exell  ia
will there be fog in nebraska
will it feel nicer in finland or new mexico today
play a song on zvooq
will it be warmer at fourteen o clock in atlas mongolia
play chad i ginsburg
play a track from the thirties
show me a copy of the picture double deal 
i want to see far cry vengeance
find the photograph the remix please
book a table over the internet for six at a food truck in vanuatu for two pm
i feel that sons and lovers deserves a rating of 2 
what s the weather going to be like tomorrow at black hawk state park
add wiktor coj to the sleep playlist 
what s the weather forecast for next saturday in granite  wi
book a brasserie type restaurant that serves pizzas in american samoa
give me a weather forecast for ca
give this book a rating of four out of 6 
i need to find a restaurant in pw 
show air cuan dubh drilseach
rate galactic pot-healer two points
add cream to the funk playlist 
what are the movie schedules for any animated movies playing in the neighbourhood
where can i watch gaddar: the traitor
is there rain in afghanistan
what is the lualualei forecast for one minute from now
play me east side story
add paul wickens to lo mejor del rock de españa
find the case of the frightened lady 
add the green book in my playlist mellowed out gaming
find the schedule for movie times for movies around here 
show investigating sex album
find the movie schedule for nearby movies 
give this album a 4 out of 6
put track on my synth pop list
book something at a highly rated and distant cafe in kazakhstan for two on april 21
play barbra streisand music from 1997 
find the movie schedules at the neighborhood cinema group
book in falkland islands at atomic cafe
give 4 out of 6 stars to this textbook
find an album called the aboriginal port folio 
give the current series a two
find trailer for iraq for sale: the war profiteers
give anatomy of a typeface a 1 rating 
list movie times at b&b theatres
add this track to my playlist it s ok to like jazz
what is the weather forecast going to be on august 15  2038 for hoffman hills state recreation area
i want to watch the tv show down on abby
what time is ghostbusters - acchiappafantasmi playing at imax corporation
can you get seating for my father and i at a restaurant in birch run
find me the movie times for the alamo drafthouse cinema
tell me the weather forecast for molino  washington
play miami 2017 by rodney whitaker
buy novel brokeback mountain
i d like hear the song sit down and talk to me
is it hot in fl
is there forecast to be snow in gu this summer
play the album will rap over hard rock for food
play a martyn bennett from 1957 on pandora
play this is: animal collective please
what is the weather prediction for acworth  north korea in six years  
use iheart radio to play eighties music from hugh masekela 
rate the previous album 0 points out of 6
tell me if it ll be chilly here at 0 pm
book a table for 5 people in goodland  ak 
i d like a movie schedule for a close by movies
is it colder today in college park then in serbia and montenegro
book a brazilian diner for 9 that s highly rated within the same area as comoros
book a restaurant with a spa in connecticut
will it be cold this autumn in norfolk island
show me the movie schedule for caribbean cinemas
ad sabah to my evening groove playlist
add this track to my rock hard playlist
i want to check out a pub that has internet in homer city 
what s the weather like in ojo amarillo
i want to see movie schedules at plitt theatres 
what is the weather in ct
what will the weather be faraway in new jersey in ten weeks
add another tune to my songs for you  not your parents playlist  
rate this essay two points
find the creeper 
is redacted playing at the closest cinema
can you let me know the films that are on the movie schedules in the area at noon
play metal crash course playlist 
add children of telepathic experiences to the playlist named baladas románticas
i need to book a restaurant at supper time in il
what s the temperature here
play songs from the sixties
play me songs from agreable
show creativity of sing to the dawn
will the weather be temperate in betances
will it get chillier in arkinda  myanmar
give star trek: the motion picture a five out of 6 
what s the weather forecast for nishi sonogi hantō prefectural natural park three years from now
i give the current chronicle one of 6 stars
whats the closest movie house showing medal of honor
i need a table for four at a restaurant in al
where can i watch the tv series breed the pain
play the cross and the crucible by angela au man sze on google music
play crazy=genius by the alchemist
can you put the album onto cierra la puerta
find mash confusion
add irving berlin to my dishwashing
what will the weather be like in lambertville  india at ten pm
play me benjamin kowalewicz s top hits
add the artist to my emotron playlist
give two points out of 6 to this essay
play fifties track music
book a food truck that is highly rated in honduras
play the new timer by augustus pablo with itunes
play the track r u professional by roberto carlos braga
can you tell me the movies that are going to be scheduled at the closest movie house
add steel guitar rag in acoustic covers the mash ups
add some jim diamond to peace
i need a table at a tavern that has bougatsa
where can i listen to the song the lost worlds of planet earth
give 2 for this essay
i want to listen to some aaliyah
play me memoirs of modern love: curious age
play some music from the thirties 
i give the previous saga 4 out of 6
add give us rest to my very nearly nashville playlist
play me a twenties tune on deezer
book a spot for 1 at a pub with internet
look for the book titled iranian journal of fuzzy systems
play ballad from mandy moore
i want to give the current textbook 0 stars
whats the closest movie theatre showing animated movies
book a spot for marlene  jordan and i on oct  the 6th
play rhythmic
give four stars out of 6 to practice to deceive
tell me the films playing at the closest movie house to me
i want sugarfoot
play some don ho on netflix
show the creativity of the attic
i give nothing lasts forever 5 out of 6 points 
give me a top-rated restaurant that s eastern european
please book highly rated restaurant  with food truck tuscan for me and adela in hallam indiana 
find a saga called lovex discography 
what time is the challenge showing at the local movie house
book a reservation for 4 people at a restaurant within the same area as my step daughter s position
party for 2 in cleveland
can you give me the movie schedules at mann theatres
i want to go to a highly rated fast food restaurant around togo with two people total 
rate earth made of glass 1 of 6
find a song called this champagne mojito is the last thing i own 
i d like to hear cry baby cry by ally kerr 
give 3 out of 6 points to current novel
rate this novel 4 out of 6
put wreck of the tennessee gravy train in the kids workout playlist  
how do i watch the tv show nba access with ahmad rashad 
can you pull up showings for pop goes the easel at the local movie theatre
add ross the boss to laurie s listas de éxitos list
play the most popular music by ronald isley on google music
can you tell me if it ll be freezing in wrightstown in seven years 
add a shot at glory  to calm before the storm
want to find the novel called innocent until caught 2: guilty
play safe rock and roll sucks on lastfm
give a 5 to a picture of her tombstone
find carry me in your dreams
i need a reservation for harveys this winter in neighboring wisconsin for terri and i
book a restaurant for 8
i want to hear a good song from 2016
is the love guru playing 
add a song by jil y creek to my spring music
find a show called star trek: starfleet academy starship bridge simulator 
book a reservation at a restaraunt in ct
i think this album deserves 0 points
rate this textbook zero stars
add the spirit of life to nação reggae
what time is the hotline playing at the movie theatre
i need a table for six near the russia bistro that has wifi
when is stripped to kill ii: live girls playing at the nearest movie house
give signals of belief in early england four of 6
i d like to watch dirty laundry at the movie house 
add song to instrumental study
add scarlet begonias to my para entrenar playlist
add the ragged curtain onto the playlist called party through the decades
i want to listen to the soundtrack the om years
i want to see the trailer for the entity
add los hombres calientes volume 3 new congo square to my descanso infinito playlist  
rate of old hearts and swords a 0
play soheila zaland
add this elbridge bryant song to my inyección musical playlist
book at the halal guys on oct  17
use google music to play a song
will it be snowy here soon
book a table for six in a togo restaurant
is there going to be a depression in point washington state forest
add jeanette to extreme metal workout
add the artist beardyman to my classical x playlist
need a table at uncommon grounds coffeehouse at eleven for nine
add the hellacopters singles to my teen party
will it be overcast in seventeen minutes in the united arab emirates
add the artist to my duetos 
find a table for 2 at a restaurant in saint vincent and the grenadines
make reservations at a restaurant in adrian that serves cheese steak
will it be warmer in ristigouche ecological reserve on nov  the twentieth
book a restaurant for my baby and i in delaware
party of four somewhere in sd
add this album to my orgánica playlist 
add this track to my comedy new releases
add an album to my list la mejor música dance 2017
i want to hear a gucci mane song from last fm from 2002
add this tune to my bedroom jams playlist
add this artist named kirk hammett to my playlist los 40 radio éxitos
i want to add in the mood to my playlist called my folksy love
please tell me movie times
what will the weather be like this week close-by saudi arabia
rate this textbook two out of 6 points
play music from 1968 on vimeo 
book a brasserie with internet fascility for 5 in a year  in oklahoma
which movies are playing at amc theaters 1 second from now
where can i find the painting for a christmas story - una storia di natale
rate the taking series a zero out of 6
i want to give this novel a four out of 6 stars
i want to watch tv series the practical pig
add vicky leandros to my piano ballads playlist
give rathinirvedam a rating of 3 out of 6
what is the predicted weather for my current spot next month
add the artist gwenno pipette to the sexy as folk playlist  
add this song to tania s new boots
let me know how the weather will be in rainelle at night 
is it warm in albania at noon
add another tune to my trance life playlist  
add sifow to my skatepark punks playlist
play me some chant from the last half of the sixties
will there be a storm in palm city  wv
which films are playing at consolidated theatres
can you give me the weather forecast in tajikistan
i need a table for four at a pub in heard island and mcdonald islands
find a television show called the passion of the betty
put this tune on my nothing but a party r&b playlist
i rate the current novel a 1 of 6 stars
is it warm in the current spot
play some classical music on spotify
i need a reservation for roscoff restaurant in valley mills
lets eat now somewhere in roach
i m looking for the show sex and candy
play the album remember shakti – the believer 
rate the following series five  points
add adele onto funtime activity playlist
give 5 out of 6 stars to the intimidators chronicle
please search for the legend of korra book 
rate battleaxe five out of 6
add an album by cowboy troy to my piano in the background playlist 
show me the movie schedules
book a restaurant in one minute for five people in canal fulton 
what is the weather close-by my current spot
show the information: a history picture
find movies nearest to a movie house
put anna grigorjewna semenowitsch in all out 00s list
put an inyección musical track in the nanette s playlist  
add this song by torch to my sing along playlist
play latina
book a table at a churrascaria for august 5 that has parking
i would like to book a restaurant within the same area as myrtle av for 6
advise me on the movie schedule of films that will be playing at 07:31:32 pm at a place close by 
i need the forecast for close by becharof national wildlife refuge in nine months
please find me the rear mirror saga 
what movie schedule
book the dunbrody country house hotel in ne for 8 people 
play netflix ballad by mike shinoda that is popular
add vertexguy to beach vibes
put k maro track on my soul lounge list
rate this essay four out of 6
want a table at monty’s hotel  secunderabad  in the state of vermont
find the so this is goodbye saga
is it going to be foggy in jewell cemetery state historic site 7 weeks from now
will it get chillier in 2 seconds in republic of the congo
find i love you too  a saga
play vanlose stairway by janove ottesen
how is the weather in indian creek village
play a new song form the eighties
can you find me the painting titled across the line
is the right to strike playing at star theatres
me and terrie need a table at a bar in hypoluxo  ut
book me a restaurant that serves festoni for eight in new hampshire
add art garfunkel to the chill tracks playlist  
what movie house is playing the animated movies nearest
what time is the bodyguard at malco theatres playing
what is the nearest cinema playing romance of the limberlost
play the greatest ricky bell music
play bald by kaskade 
what s the weather forecast for saint pierre and miquelon
give 1 points to the duel: pakistan on the flight path of american power saga
will it in hail in my current position on 12/10/2035
show me the picture unfinished monkey business
add christopher lawrence to my always pop punk playlist  
add entity eternally to playlist lazy chill afternoon
please find me the purple vigilantes book 
where is among the great apes with michelle yeoh playing and when
i need a table in your position at churrascaria for a hot dog in the same area
book a restaurant with a pool far from robbie s hostel for me  chandra and noelle at nine pm 
will it be hotter close by here at 13 o clock
add country nights by a journal of the plague year to playlist
book reservations at a restaurant in iron springs
find the movie schedule for century theatres 
add this tune to the deep dark indie folk playlist
book a restaurant in ms that can seat ten at 01:51:47 pm
will it be colder in connorville 
find stays in mexico 
play the top-ten soundtrack from kiara 
how humid is it in paducah
the latham diaries deserves a rating value of 0 and a best rating of 6
need to find the tv series called administrative behavior
what are the movie times for movies premiering in the neighbourhood 
book a table in mississippi on may nineteenth  2034 for me  silvia and sandy
add riddim driven engine 54 & humanity letha s all things post
please put book of love on my ntc high intensity training tracks playlist
what s the weather forecast for breakfast time in palau
score this album 5 stars
please search the big game show 
can i see the movie times for the great escape theatres
i want to watch the movie x window display manager
play 1988 chant music on itunes
the night lamp was ok at best  two stars out of 6 possible 
will it be warm at tembe elephant park on san jacinto day
play soem nineties charles thompson
will it snowstorm in lampi island marine national park
movie schedules of movies in the neighbourhood at zero am
please pull up the photograph entitled another period
when is janeane from des moines playing at the nearest movie theatre
add this track to anochecer urbano
is there snowfall in hineston new hampshire
what will the weather be like 1 minute from now within the same area of my current location
add this clint mansell song to latin pop classics
add brian may to my reggae infusions list
open last fm and play the top song from daniel lee chee hun
i want to eat at a brasserie that has internet near greenland at elevenses 
will it get colder by 11 in jacobsburg  syria
show movie times for amc theatres
put claude vonstroke onto my this is earth  wind & fire
play oj  jelena  jelena  jabuka zelena by ler lalonde 
add this song to my the perfect italian dinner playlist
what is the closest cinema today playing animated movies
play a twenties song
the series city on fire is a four
play music on the playlist electronic gaming
fine the movie schedule for warren theatres 
find later that evening
add julia fordham to the massive soca hits playlist  
when is we stick together through thick and thin playing at arclight hollywood
i think this textbook should have four stars and a best rating of 6
play my playlist springtime
what s the weather in totowa wy one minute from now
add yuna ito to the hot rods & horror shows playlist  
rate rajinikanth: the definitive biography one out of 6 stars
weather in 3 minutes at jean lafitte national historical park and preserve
find the movie schedule for movies in the area 
i d rate the current chronicle 2 points
what will the weather be in nm in 1 minute 
add this album to my adrenaline workout 
what movie theatre is the closest that is playing cheat you fair: the story of maxwell street right now
tell me the weather for sewickley at twelve am
play the game piety street
i have eight that would like to eat cretan in a cafeteria and need reservations 
play track her majesty
i want a table for 7 at a popular cafeteria on holy saturday in ga
what s the weather forecast for etna green in 11 months 
how much fog is there in hahnville
play the song le renouveau
what is the eugene t  mahoney state park forecast for 2 days from now
what are the movie schedules for films in the area
will it be colder this autumn in wren  saint martin
show me the show goldimouse and the three cats
add song to trap land
add the entity por una cabeza to my playlist forever alone
find the world is ours at a movie theatre
play zvooq
can you find the soundtrack for westcountry live
i rate three points for the book the early coorgs
give 5 out of 6 points to thorn castle
what time is careful  he might hear you playing at the cinema
book me a restaurant ten minutes from now
where can i find the brave little toaster to the rescue book
rate the lost hero chronicle four out of 6
is it going to get chillier in kuwait
find the video game journal of criminal law & criminology 
the postman is awful and only gets a 1 out of 6  
add east grand blues to the this is nicky jam playlist  
find dipson theatres animated movies
what is the forecast starting on 5/17/2037 for austria for warmer temps
find live at bonnaroo 
will there be a depression in wheatley
which animated movies are playing today at kb theatres
give a human being died that night 3 stars 
add this song to my southern gothic playlist
book the last exit on brooklyn 5 hours from now for one person 
i would rate this album a 3
play some movement music by perez prado on iheart
give setting free the bears series a four out of 6 stars rating 
play anything from 1970
i give the lacuna a rating of 5 stars under the chronicle rated at 6
can you play fifties theme music by mohsen chavoshi
find the movie don’t break the heart that loves you
are there any painting of the 1st concert oh yeah 1999
book me a tibetan restaurant for my boss and i 
i want to add broken hearted melody to the playlist post garage wave revival
i want to watch the movie maxime
play the crowd: a study of the popular mind soundtrack
add the artist  tony thompson to my canta en la ducha playlist
will it get hotter far away in afghanistan
book a table for five in unalaska this month 
i d like to see sex tape - finiti in rete
is f i s t  at malco theatres
add jerry dixon to my chill out list
will it be warm in hematite
i want to find the video game masada anniversary edition vol  3: the unknown masada
add the stars and stripes forever to the soulful disco playlist 
find the movie schedule
book a bar for 2 in hayden row on friday
play music from the eighties on slacker 
give the slap 0 stars
have zvooq play songs from the fifties
find the schedule for central airport at the closest movie theatre 
find a trailer called colony 7 
add tolmatschowa schwestern to my street dance playlist
please find me a table at a place that serves glace  has room for six and a pub atmosphere
i want the video game two more years
book a table at the eighth step coffee house that isn t too far from vineyard haven for candace phillips  debbie and sondra
put this kes song on the feel good indie rock playlist
what is the book sell your body
add tara blaise to my power gaming playlist
book a brasserie at turtle creek neighboring on march sixth  2038 for eight
play me a song by saki nakajima
i d like to visit a pizzeria with a pool at fourteen o clock 
open spotify and play a song from the twenties by richard harvey
what is the weather forecast for djibouti
find the novel meg and seron
book reservations for five at eleven madison park today within walking distance from flaxton
how much humidity in mancos
play abhijeet bhattacharya from 1986
this current album deserves only a one rating
add nothing can stop us to my lazy chill afternoon playlist 
rate this textbook 5 out of 6 points
show me the work not a little girl anymore
book a brasserie for connie scott and madeline in northern mariana islands in eleven hours
play melody music from the fourties 
play the top twenty chant by wise 
i need a photograph of the oregon desert
add this album to my mediodía acústico playlist
which films are playing at the imax corporation
play bill evans album the best of the 12" mixes
find the schedule for tube at the closest movie theatre 
add pimp c to my workout remix  
please book a brasserie restaurant for eight in ireland
i d like to get reservations for four at a restaurant that serves apple sauce 
what is the forecast for dec  15 in lake woodruff national wildlife refuge
book a table for three at a restarunt in federal hill
play some glenn miller 
play my acoustic covers playlist on spotify 
i d give the quotations from chairman mao tse-tung saga two of 6 stars
find the photograph jboss enterprise soa platform
look for the chu chu and the philly flash picture
book a spot for ten at a pizzeria that has tourte in minnesota in 22 and a half weeks in yamhill
play a song off the nicht sprechen album
how s the weather going to be on jul  2 in whiteside
add another artist to my soul bpm playlist
book a restaurant for ten in exmore at sunset
add gregory douglass to my whm list
can you add a tune by natalie macmaster to my viajes playlist
i want you to put this track onto the playlist called throwback party 
i need a novel about polymer chemistry 
for my playlist fresh finds hiptronix add the name polka medley
what time is one night stand showing at cineplex odeon corporation
can you get me a table at a tavern in slovakia
incorporate a russel walder track onto gay s funk rock playlist  
what s the weather like here
where can i find police story 3: supercop
play some ray williams music from the nineties on spotify
what is the nearest movie theatre showing ocean’s 13
can you give me a list of films at cinemark theatres
book a restaurant for ten in germfask 
i need to episodes for the tv series  fast food nation 
is it cloudy here
add the artist to the latin jazz playlist 
would you please play me a symphony from 1995
add this track to the playlist korean osts
what s the weather faraway from here on sep  the fifteenth
find movie schedule for animated movies in the area
play a 1964 track from shahram nazeri on pandora 
add my old kentucky home to fresh finds fire emoji
find heroquest ii: legacy of sorasil 
book a pub that serves fries for 9 people 
i want to rate the turbulent term of tyke tiler a 3
give five out of 6 to this book
can i get the movie schedule for megaplex theatres 
will it be chillier in uruguay in 213 days
i want to hear la jaula de oro by mc ren on google music 
what movies are currently playing at the caribbean cinemas
i would like reservations made for masonville  vermont nov  7
add anthony hamilton to my list women of hip hop
rate this album three stars
whats the closest movie house showing home room
i want to add robin hood and queen katherine to my playlist entitled genuine r&b
fine movie times for animated movies in the neighborhood 
i would like to rate the book the three impostors 2 to 6 stars 
what s the temperature today in griffin  ne
play a new ballad by valy on iheart
how can i watch the television show tinker bell and the legend of the neverbeast
rate the making of a teacher a two
i want to give the unpleasantness at the bellona club 5 points
book me a table for 8 at a restaurant for seven pm
find chained heat
rate 5 out of 6 stars to this album
book a reservation for seven people at fraser mansion in il
i give the following album two out of 6 stars 
will it rain on sep  25th in east tawakoni
play tomorrow
what s the weather forecast for belknap
book a table in a haines borough restaurant for nine that is within walking distance 
give four out of 6 points to current album
play a seventies tom thacker ballad
play thirties on lastfm
what is the weather like in hebbronville venezuela
add song to orgánica
add nina hagen to essential folk
play some mf doom from the sixties on pandora 
rate the warrior prophet 3 of 6 stars
book a spot for robyn martinez  maude and i at a steakhouse not far from their place
what is the weather going to be at dinner time in the lake le-aqua-na state recreation area
play the album cara de dios 
play me a seventies song
book a reservation for a pub with internet for 2 people
show me the album andrews university seminary studies
i need a table at light horse tavern in city of the dalles nh for kathleen  brianna and i
play hasan saltik from 2004
will there be rainfall the day after tomorrow far from rodna national park 
book the kegs drive-in in 37 weeks  in saudi arabia
add this tune to the duetos playlist
add jonny buckland to my playlist weekly buzz
find spirit of the bush 
book reservations at a restaurant with vickie and caitlin on february the second  2018
weather for my current location tomorrow
what is the weather in nd the city of evangeline
will it be hotter in pecan grove
play slacker tunes by smog from movement in 2015
show movie times at sunrise
what will the weather be in a month from now at my current location
add nitti to my family favorites playlist
when is red shirts showing at dickinson theatres
add this annabella lwin track to indie alternativa
i want to watch wide-eyed and ignorant
play the ashley tisdale discography tv show
book a table for 1 on november the first  2022
i need seats for 10 at a highly rated restaurant
find a reservation in hesston nc at a new restaurant
i d like to book 4 seats at a restaurant 
add this artist to lo más dance playlist 
how will the weather be on may 9 in wyoming
what s the weather close-by triumph
book a reservation for eight people in north dakota
can you please look up the game  the islanders
play some 1982 movement music on slacker
the current book i m reading should be rated zero out of 6
what time is in old new mexico showing today
play a top five linda strawberry ep
please find me the magic hour saga 
i want to see return to yesterday
put the artist michael todd in my afternoon train ride list
show the creativity of where what when
find the schedule for for the unnaturals at 13 
is the weather temperate in millinocket
play a good john maher record with netflix
what time is the sea chase playing
where is puthri playing
add this song to my cleaning the house playlist
will it get hotter in zenith ct
play me the trailer for gainesville daily register 
find pat garrett y billy the kid 
rate the honourable jim a three
find long walk to forever  a novel
i m looking for a novel called the adventures of lolo ii
i need to book a restaurant that has wifi far from tx for me and my parents
at 4 am book a bar in the spa in shamrock for eight
rate this current textbook 0 points
find a loews cineplex with films
play me the soundtrack ready
add a bill deasy track to the conexiones playlist  
add song to my club hits
i would like this artist on drum & breaks 
which movie theatre nearest me is showing animated movies starting now
find the envoy of lucifer show
what s the weather like in saint regis falls nd
what is the forecast for january twenty-eighth in kentmore park
what is the current position forecast for starting on july 22
book a diner place or me and my best friend on holy saturday  capital of united arab emirates  where they serve pepperoni dishes
find a painting called thunder in the sky 
grab a table at a restaurant in minnesota that serves ice cream cake
show me the book the republican brain
i want to eat at the bar saint vincent and the grenadines at thursday for five people
add joey fatone to my spotlight on country 2016 playlist
what is the forecast for bonner starting oct  24th  2025 for argentina
book a table for 3 in macao
show the movie schedule
show me the book pokémon: the johto journeys
can the artist big mama thornton be put onto my trabajo relax playlist
please get me the british journal of dermatology game 
what is the colder forecast for nationaal park bidoup núi bà in a week 
rate the scoop 4 of 6 stars
i want movie times for fox theatres
tell me when it ll be sunny in ralls  marshall islands
edit classic road trip songs put on sammy cahn
give this textbook a four 
add dave carpenter to my acoustic blues playlist
show schedule for loved by thousands
when does of stars and men play
what is the forecast in wild river state park
this essay is five stars for sure
find animated movies movie schedule in the neighborhood
play 2006 chant music 
when is the blood stain playing at the movie house
add tune to my instrumental funk playlist
give the current chronicle three points
rate the strange death of tory england 1 stars
rate this chronicle 3 stars
is dead fish playing at the movie house
what s the weather this month in mozambique
i need a reservation for 3 at clinton street baking company & restaurant 
please play me some satire music
get me reservations for an indoor honduras restaurant 
is unsettled land playing at the movie theatre
what s the weather in mountain center
what time does the maze start at cineplex odeon corporation
the current book deserves a rating of only one 
add the 3rd world to my focus now
please find me the youth against fascism television show 
what time could i see a mile in his shoes
i want to hear a 1976 symphony by jam master jay
can you put dj kay slay onto the 2010 decade playlist
what will the weather be like in 16 weeks at the ivory coast
is there a storm in maliau-basin-conservation-area now
is it going to be warmer in cinnaminson  north carolina at 06:59 am
can you play a top song from a chyi chin concerto
what s the weather like in el salvador on wed 
i want to book the best manadonese restaurant for six at 21:49 that is distant from my baby s work 
what cinema is playing the strongest instinct now
i want to book a table at a nearby restaurant in andorra for me and my kids 
how s the weather looking in pheba
is it snowy in demotte ms
what will the weather be like on september the eighteenth in puerto rico
book a stuffed peppers serving bakery for 9 at woodsfield vi
what time is showcase cinemas playing straight is the way
add tune to soft rock playlist
what time does johnny got his gun play
make me a reservation for a party of six at the k club on feb  7th
add another song to the country playlist  
add beverley knight to my mellow beats playlist
rate this album 2 points
how will the weather be at 9 am in anguilla
what will the weather be in umatilla malta
add bedroom jams to album
show me the advocate
in seven hours from now will it rain at my current place
give upon some midnights clear chronicle four out of 6 for a rating 
tell me if it ll be freezing here in 21 seconds
i need some ambient music  
show creative song called holidays on the river yarra
play the song waar is de zon on slacker
i d like to see the trailer for history and theory
will you please pull up movie schedules for me
show me the schedule of outlaw of gor at nearest movie house at 5 a m 
can i get the cineplex odeon corporation showings for small town story
show the man from london video game
play chant from the nineties with last fm
give this novel 5 stars
what is the gearhart forecast
in 1 hour and 1 minute find a cinema nearest for films
find cluster computing  a game
this novel should get zero points for how intrepid it is 
give 5 points to current novel
rate the current novel a zero 
add some fujimoto yae to my women of rock list
will it be snowy in crouch  french polynesia
give two points out of 6 to this novel
i want seats for 4 at a sichuan food restaurant in indonesia
rate the archivist three out of 6 stars
fine movie times for loews cineplex entertainment 
play the album a kiss before you go by bt
is it hot in neighboring algeria
find a reservation for eight at rhodes twenty four in gu
rate the current textbook 1 of 6
what is the weather forecast for here
are there any animated movies playing at the mann theatres
where to buy book bright ambush
show me the closest movie house playing animated movies please 
i m looking for paris match
book a table in eastern european restaurant in macedonia 
tell me what films are around here
find movie times for films close by
make me a reservation at the restaurant at meadowood for a party of 7 in armenia
please add this album to the playlist titled hip hop 2017 new school
find a soundtrack called fast as you
put sungmin into my summer playlist
find a painting called chettathi 
i d like a table for my teenager and i at the washington  d c  jewish community center
i m looking for you to get me jack of shadows 
book a bar with a pool in mountain iron 
i d like to hear one of eric clapton s most popular melody on pandora 
give this novel two points
rate the book giants of the frost two out of 6 points
play the greatest 1972 album by wes dakus
put dj green lantern on my targeted playlist
what animated movies are playing nearby right now
what is the forecast for around putnam lake
what is the weather in twenty three minutes in nv
will weather conditions be stormy here from 6/15/2025 onward 
check which cinema currently runs when the last sword is drawn 
find starcross
show me the lowest price for the game sinatra reprise: the very good years 
find me a saga by reproductions
book a table for 10 at a restaurant in federated states of micronesia 
please check the weather forecast here 
play roland alphonso tunes that are most popular
play the latest 1973 album by peter derose 
give 99 coffins 0 stars out of 6 
when is em4jay playing at the movie theatre
want to find a creative work called the prayer
play a concerto top ten sort by lloyd 
will there be a depression here on october 26
book a table at a restaurant which serves sushis next week 
play popular eighties record
the chronicle of the emperor wears no clothes was too naive and simple  i d give it 1 out of 6 stars 
book a table in oh the city of bock for party of ten for tonight
book a joint for feb  the seventh in oklahoma within walking distance for six that is highly rated
where can i find appalachian journey
play punk essentials on google music
how is the weather in oh
search for a picture of darker than black
what is the british virgin islands forecast for next november
play some rui da silva 
find me the big sean discography soundtrack
add a randy travis song to deep dark indie folk
i want to hear some freestyle music 
i want to make a reservation at the conflict kitchen for one 
i need a table for me  violet and maude at a restaurant in ne 
what is the forecast for march the twelfth faraway from pine mountain state resort park
i give the elegant universe five out of 6 stars
book a spot at a restaurant with trattoria in otho de
show the latest animated movies movie times for the nearest movie house
play angelo amorevoli
where can i watch mabel’s dramatic career at twenty two o clock
is it snowy in ocean shores
book a spot for ten in upper marlboro pr
find the movie schedule for great escape theatres 
play seasons in the sun by rosco gordon on iheart
i want to give the nightmare fair five stars and a rating of 6
show me the nearest movie house showing moron 5 and the crying lady
do you know if it will be chilly today in puerto rico
freud: a life for our time deserves a solid 4
add tune to my folk music at the gaslight café
find a game called a very special christmas 7 
can i get the movie schedules  for loews cineplex in six hours seventeen minutes and eighteen seconds 
can you help me find the author author trailer
weather on september 14 in crofton ukraine
add tune to women of pop playlist
include jesper kyd in the grime instrumentals playlist 
how cold will it be in palau around fourteen o clock
add annette artani to the playlist titled all out 90s
add genocide to electronic bliss
make me a reservation in ne at a distant resturant that is a pizzeria
please book a joint type restaurant room with spa facility to accommodate 8 members
where is project a part ii playing
play brian clifton off groove shark 
find the closest movie theatre with animated movies
put this song on my indiespensables playlist
play some dj qbert 
i need movie times for films in the neighbourhood 
what time is the riders of the whistling skull playing at magic johnson theatres
find a novel called chemistry - an european journal
play some nineties music on zvooq
play some sad songs from the fifties
add this song to noreen s fresh finds six strings
i would like reservations for giodi s in piper az 
play goldie hill s record on google music 
rate the previous essay 5 out of 6
add elastic love to this is stormzy
show movie schedules for animated movies playing close by now
i wish to hear the playlist estado de ánimo on last fm 
play music on spotify 
i would give basic battle skills a rating of four
can you give me the forecast for keytesville for 12 minutes from now
what is the forecast for orienta for hotter weather
please locate sad love story novel for me 
i need to find best of the west rides again
i want to hear a top ten soundtrack from 1984 by shinehead
what will the weathr be in akin jamaica
find movie times 
what will the weather be like in the bahamas eleven years and a half from now
play eighties
open spotify and play a couple of celtic songs
add embryo to lessie s hands up
what is the movie schedules
add this tune to my playlist guest list mashable
i d like to eat at the original spanish kitchen in north carolina
restaurant in west virginia for my son and i
i d like to see snowball express
the book the chymical wedding is only worth 3 points 
what is the depression forecast for in five years  in altyn-emel-nationalpark
find movies at the nearest cinema
add undressed to my country icon playlist
in a week  make a reservation for a table of 7 in district of columbia
i d like to watch abbott and costello meet the keystone kops at amco entertainment at 04:08:11 am
what will it feel like in the current place in july
where can i see animated movies in the neighborhood 
play the greatest james yorkston song
book a spot at a crown burgers that is close by west compton
i give the knife of dreams saga a 0 of 6
search for comedy underground with dave attell
i want to see animated movie in the neighbourhood
i m looking for an album called the orchestrion project 
book a best restaurant in wrigley 
put kan on my indie rock road trip
add hello  my lover  goodbye to my deathcore playlist
play glenn yarbrough tunes
i want to read the book the lion sleeps tonight
book a reservation for irene and rosella at the room in the elephant in israel
find a painting called break down 
book a bar that serves stracciatella in north dakota for four at four am
play music on netflix by don kikas
what time is sundown: the vampire in retreat showing
rate this album 4 points
rate this album 0 points
add a mina caputo album to my after hours party 
play an masaki aiba tune
show me the schedule of american primitive in santikos theatres
add monsters this is prince playlist
find plitt theatres now showing poverty and nobility
rate dick sand  a captain at fifteen a two out of 6
give this album three out of 6 points
can i get the movie times for in the neighbourhood movies
play some psychadelic music 
play stereo by jonathan davis on deezer 
book reservations at a restaurant that serves puglia for jan  24th
is there a snowstorm coming in dana at 4 pm
this essay should get 1 of the points
look up the gun soundtrack
what time is kickboxer showing at cobb theatres
i want to hear music off my indie festival playlist
book a table for 8 right now for a restaurant in meadow vale
play me the greatest howard levy song
please use pandora to play a record from 1993
what will the weather be like in nickelsville
i m looking for the saga lifelong ambitions
find the schedule for heart beats 
is it temperate in the current location now
i want to hear music from carman from the 1966 album
is liberator playing at the imax corporation at 11
what s the weather forecast for pointe-heath ecological reserve at midnight
add tune to nusic
add etta james to my anochecer urbano playlist  
is transcending fear at malco theatres
show me the movie black summer
play some music from the thirties
i m looking for a local cafeteria that has wifi accesss for a party of 4
will it be warmer in amnicon falls state park
please use itunes to play something from 1986
book a spot for me and sonja at a popular pizzeria
find animated movies close by with a movie schedule
what s the weather forecast for mansfield
is it colder in paraguay this morning
add amir khan to my playlist acoustic blues
play the top caleigh peters 
i d like to get a restaurant booked on mar  fourteenth in md 
add all together now to my playlist the road to punk rock 
show me the album apache axis2
is it going to be hot in chrisman
open netflix and find a movie with the song heartful
i need a table for six at a bar that serves varenyky
rate my current album 5 points
wuill it be cloudy in dickson city illinois
i wanna listen to a the top-twenty track of denniz pop in pandora
what film to see at arclight hollywood
find the picture nur mit dir – a walk to remember
i d like to watch abbott and costello meet captain kidd at the nearest cinema
give the book buzz about bees a 2 star rating out of 6 
what animated movies are at the closest movie theatre
play the latest melody from cliff edwards on deezer
rate the current essay one out of 6
give 0 out of 6 points to current book
rate the philosophic thought of ayn rand three of 6 stars
find remedial chaos theory  a soundtrack
book a fried fish serving restaurant for one at 20 hours from now
find me the showtimes for how to commit marriage 
find a movie called no more sadface
find a soundtrack called the book of folly
find the song the fourth man
what animated movie are at the theater in the neighborhood
give this novel a two star rating 
put this song on my ntc high intensity training tracks playlist
rate this album three out of 6 
i want to book a restaurant within walking distance of my neighborhood 
rate the current essay book four out of 6 points
add artist to showstopper being mary jane
add this track to krystal s piano 100
add the fire and the wind to my digster future hits playlist 
add a song to my playlist independent music monday
where is the closest cinema that features animated movies
i m looking to book a seat at a bakery that serves coleslaw at 19:44:58 
how will the weather be this summer in new york
this current book only nets 3 out of 6 points
give the judas tree a zero
what s the weather forecast for next week at my current position
find movie schedules for me
i need a pub with a smoking room in ucolo reserved 
what is the forcast now in kansas
find a painting called beyond the neighbourhood 
rate current saga one point out of 6
can i get the movie times for films in the neighborhood
show me animated movies that are playig at great escape theatres
i want to find the adventures of lomax 
play twenties chant from lagaylia frazier on itunes
i would like to book a table at a delicatessen in punjabi for me  angela and vilma
what time is last exit to brooklyn playing at movie house
i d like to take a party of five today to a place in colorado
i rate cold tom four points and a best value of 6
book for lobster newberg this week in malaysia at a restaurant for four
i d like to watch broadway nights at megaplex theatres
play fourties chant music on last fm
get soundtrack of comprehensive knowledge archive network
play a record from 1950 
add glory in the highest a christmas record in my playlist cleaning
play concerto from 1951
play me something by funtwo
give this textbook a four
give this essay one star out of 6
book a table for a party of 7 next year in id 
what are the movie times for films playing nearby
add this track to my gold school playlist
what is the forecast for here at 8 am
add this track to my love hurts playlist
play some fifties music by origa 
whats the closest cinema showing swamp water
play the seamus heaney collected poems song
in twenty three hours and 1 second my daughter and i want to eat at a restaurant
play a 1994 tune by lena horne
i give this series a value of one and a best rating of 6
rate the book the outlaws of sherwood two stars
i d like to hear songs from iheart
rate this book three out of 6
what is the forecasted humidity in ghana for epiphany
find the transformers: generations video game
i want to hear the latest twenties album from kyle riabko
give 1 points to current textbook
lets eat at newport creamery in carnot
whats the forecast for redby
i would give this novel four stars
the current album deserves 0 stars
rate this book one for this stars judging
where is ennarukil nee irunthal playing
shawn lane should be moved to my cena con amigos playlist
rate this book 3 out of 6
can you play a song from the newest movement by prince on lastfm
show me the movie schedule in the neighbourhood movies
i want to see the television show the muppet christmas carol
add agua y sal in classic jazz funk
put the orange and the green on los 40 radio éxitos
is it overcast in ziwa rhino sanctuary
book a spot at a highly rated afghan restaurant
can you add john scofield newest tune the selektor  to the playlist
i want more francis healy in the rockin  vibes playlist  
reserve a table for my bf and i at montreal pool room in indiahoma
what animated movies are playing at fox theatres
is it forecast to be temperate here
play the top chant music from 2014 
book reservations at a restaurant for eight people in new jersey
is it overcast close-by in illinois
rate this book one stars
i would like to book a food truck with mughlai cuisine in somalia
play the newest ep from the sixties
rate current book 2 of 6 
play music by ryan malcolm from sympathy for the devil on pandora
what is the forecast on 12/9/2039 at florida caverns state park
where can i purchase papers in regional science  the album
i need a table for 8 people at a restaurant in district of columbia 
what animated movies are playing at imax corporation
play me some music youtube
add a jang nara track to the hip hop gaming playlist  
what s the weather going to be like in a week at big walnut creek nature preserve
i d like to book a place to eat in ny 
find a tv show called studies in logic 
i am giving this current textbook 4 stars
what films are showing at the closest movie theatre
can you make reservations for a party of eight in iowa
rate this current saga one points
i want to eat supper at a lesotho place
give me showtimes for films in the neighbourhood 
can you play an ep by tatjana iwanowna bulanowa
gve 2 points to the stinky cheese man and other fairly stupid tales
play christian gangsta rap
play a top-10 ballad from 1995
play new melody by kenji ito on itunes 
find a video game called the yellow claw
find soundtrack titled the house of the yellow carpet
where can i see the show latin for lovers
add robert nighthawk to novedades pop
i d rate glaring through oblivion a zero of 6
please book a coffeehouse restaurant type room to accommodate gretchen  trisha and amber which serves pastelaria dish
will it be freezing in new ringgold nebraska
i give one clear call zero out of 6 points
find journeyman 
what s the weather forecast for connecticut
glory season deserves a perfect 5 points 
find fanatic 
rate merlin effect a 0 
tell me if it ll be freezing in 5 years  in rockholds  norfolk island
play iheart tunes by neil finn
play music from the year 1964
where can i find the video game called izuna 2: the unemployed ninja returns
a sport and a pastime is a solid 5 out of 6 points
reserve a table for two at a  restaurant which serves creole around here in myanmar 
add reggaeton classics in playlist jennie  jennie
play the it could only happen with you album by lawrence
i d like to watch movies now right nearby
can you pull up the sanford herald
find dickinson theatres showing from bondage to freedom
i need a table somewhere in culver city wa
what movies are scheduled at the nearest movie theatre
find back to boomtown: classic rats hits  a soundtrack
is the expected weather temperate here in 1 month
i would like to see the closest cinema playing films 
i rate the book you only live twice two points
play some rock music on youtube
add paula abdul to classic acoustic playlist
play a soundtrack from 1954 
play oliver cheatham s symphony from the thirties 
find dyskografia nick cave and the bad seeds 
i d like to watch movies close by
can i get the showtimes for animated movie in the neighbourhood
please find me the book step into my groove 
add this infernus tune do marsha s de camino a clase
rate shadows alive 3 out of 6 points
is it cold in windhorst
book a restaurant in myanmar for 4 
add artist matt noveskey to journey
go to bioruby
find kerasotes theatres with movie times
will it be hot in the cayman islands on november 12th  2035
what is the weather in port vue
play vivian stanshall from 1962
what is the forecast for farmerville in cape verde
book a table for doris and i in new tulsa
add current album to my pop gaming playlist
give four stars to what the day owes the night
what is the read all about it picture
add this piece to my spotify orchestra cello playlist: colors of the wind
play some music from roberto carlos
please look up the novel  heroes of annihilated empires
what s the weather forecast in nationalpark banc d’arguin
play music from 1959 by lenny leblanc on pandora 
i want this chronicle to get a rating of 4
i d like to watch bound for glory at the closest movie theatre at 21:41:08
what animated movies are at fox theatres
book me a reservation for an osteria campanian on jun  the 7th  2022
can you give this textbook a 2 out of 6
show me the movie times for animated movies in the area  
i d like to hear helen baylor
show me the movie schedule for movies around here
tell me if there will be hail at tea time in nordland
add naseer shamma to piano chill
where do i play the video game the wild geese
rate the pig scrolls one of 6 points
what s the weather in niagara
rate this album 0 points
book a restaurant in swaziland in 1 hour 
is it warm at seven am in greenland
play most popular from nil burak on slacker
i give the following textbook three points
rate the current textbook 3 of 6
show me it might as well rain until september
find me the jquery mobile tv show
i think memorial day should have a rating value of 3 and a best rating of 6
what is the weather now in james city
restaurant scandinavian in grenada
what is the best restaurant in kentucky for ten at 0 am
give the current novel a rating of 5 out of 6 
play magic sam from the thirties
add the album to the metalcore playlist
what is the weather in steward
put sarah blasko onto my the metalsucks playlist 
book a reservation for seven people at a highly rated restaurant that serves moroccan food in east greenville
play me a song from 1972 by sweet emma barrett
find the movie schedule for the cineplex odeon corporation 
add this artist to reggae classics playlist
play clay aiken s the bonny hind on groove shark 
book a spot for 6 in pilot mound palau on feb  the twenty-fourth
what is the forecast for this current position for chilly temps
add the artist leann rimes to the women of indie playlist  
find the movie schedule for fox theatres at supper time 
will it snow in haigler bosnia and herzegovina
i want to hear a silvia night ep from the sixties
incorporate nao kawakita into the epic classical playlist  
please call and reserve seating for march 6 at a diner in kyrgyzstan
i am giving this book called the wide window one out of 6 stars
i d like to see the picture chrome dreams
add this artist to sunshine reggae 
list movie schedules
give me a list of films at amc theatres
antoinette and i want to eat at an oyster bar that serves pizzette in south duxbury me
play anything from the twenties
reserve me seating midday at bear hotel
 what is the nearest cinema playing the hour of temptation
what is the price for the album praise the lord and pass the ammunition
i give jonathan livingston le goéland 2 of 6 points
i give the alchemyst: the secrets of the immortal nicholas flamel 2 out of 6 stars 
show the monkey soundtrack
play the best chant of 1975
show the second civil war saga
rate this awful book called cold with 0 out of 6 points
rate my current textbook three out of 6
play some dance music 
when is game in the sand playing at the movie house
please get me the very best of chicago: only the beginning 
rate this novel one of 6
forecast for vi 
book a table for me and my step uncle in malta at a cafeteria
what will the weather be in palm bay pa
i d give a man called ove a 1
i give a zero rating for this essay
add an album in my playlist in the name of blues
is there a lot of sun in qatar
add the private collection onto my cena elegante playlist please 
book a irish serving brasserie in az
is prophecy playing at malco theatres
play the most popular grace slick song that has a symphony sound
rate leap into darkness 1 points
add this artist to my this is miguel bosé playlist
what animated movies are showing in the neighbourhood
rate blood and gold saga 0 points
rate a thousand lies series a 3
play the last mile album
my idea of fun is a book that should get 2 stars 
what time is the taking of pelham 1 2 3 playing at the movie theatre
add artist leonard cohen to my indie brazuca
find the movie schedule 
this novel gets 1 star
open my music playlist on youtube
i want to take christy  louise and alexandra to eat at 17:38:04 anywhere in ne
i want to hear ding dong bell on groove shark
i need to book the beardslee castle in albania for me  cassie and lesley
play pandora tracks by akhtar sadmani
i would rate this textbook 5 points and a rating value of 6
what s the movie schedule at national amusements
this chronicle rates a one for first contact
on itunes play the latest anna yesipova ep
put conway twitty in the this is tchaikovsky playlist  
please rate the current textbook with 5 stars out o 6
play track real talk
show cold weather forecast in five hours and 1 minute in hokendauqua  mongolia
add a tune to the calm vibes playlist 
is the sun coming out today in lacassine national wildlife refuge
show me the album clarke
the comics we loved gets 1 out of 6 points
rate the zenith angle one out of 6 points
need a table at the goof in croatia for a party of three
i need to see cristo in india
is it forecast to be hot in greenland this winter
play gothic music
i need to book a theme restaurant this month in chile
play breathtaking music
input this album onto my all things post list
me and my father in law want go eat gratin at a restaurant
is it freezing close to dc
rate this album 1
find movie schedules for loews cineplex
i want to read the novel love is in control
find an outdoor facility for midday in datil at a pub for six
i am giving this current book under the series section one stars
show me then we came to the end
can you find the novel journal of social work
play teri meri by josh white
add artist to acoustic soul
find the labyrinthe game
rate the last saga 3
what s the forecast for my current spot
what time is the cobbler playing  at the closest movie theatre
shoe the movie showings for the closest cinema showing international movies
rate my current book 3 out of 6
please look up the song  twist of shadows 
i want to hear de eerste keer from paul caiafa  off of google music
please tell me the current and local movie times
i want to rate the saga the italian two to 6 points 
what films are showing at national amusements
the cool world gets 4 points
rate the current textbook a 5
what movies are showing at the nearest movie house
give 2 out of 6 points to current book
what is the weather forecast in 11 seconds for frederick douglass national historic site
book a table in greece for 4
find the picture their finest hour
play ballad music by jeff lynne 
i need a reservation for 2 within walking distance of hoyt st
is it warm in vietnam
weather in nationalpark nevado tres cruces on mar  4th  2020
rate the current textbook 2 stars
play the song culture and psychology
book a restaurant in mcmurray on august seventeenth for marjorie vasquez  edith and martina
i give this series a one out of 6
for this novel i give a rating of 4 out of 6
play me the last 1980 record by brenda kahn
what is the weather forecast for maryland
weather for burr
find the movie schedule 
i would like to book a restaurant in singapore for nine in 19 hours and 1 second 
i think this book should have a rating value of 1 and a best rating of 6
add tune to this is trey songz
add without your love to my showstopper being mary jane list
will there be a lot of wind in west fargo gu
rate the australian ugliness 3 points
i want to take me and my crew to the smoking room restaurant
what is forecast in keyes summit in new mexico at 3 pm
show creativity in cross currents
add however much i booze to my playlist called atmospheric black metal
i want lay down your arms in the indie español playlist  
add jalal zolfonun to my nature noise
play melody music from 1988
tell me if it will hail in kyrgyzstan
rate the city of lost souls one of 6 points
play me some music on deezer
rate religion and dharma saga 1 points
play prints in the stone by helen baylor
i need reservations in nd in the city of briarwood for me and my colleagues 
add the trey gunn tune to my french n  heavy playlist 
can i use lastfm to listen to twilight time by dj khalil
i need a bakery that serves beef manhattan at midnight for nine
this is a 6 rating for the album down to one
book a spot for seven in 8 seconds from now
make a table reservation at the top-rated brasserie in cotton center
please look for orion you came and you took all my marbles
find a photograph of time loves a hero
play deezer
what movie theatre playing animated movies is the closest
play fifties from sirusho harutyunyan
play fais les backs by sarah geronimo on youtube
add track to fresh finds
i need a reservation for nine at 03:44 am in wi
rate my current textbook 0 out of 6
can i get the movie schedules in the neighbourhood for the newest films
play lily  rosemary and the jack of hearts by chris goss
what s the weather in paulette yemen
tell me the weather forecast for my current spot 1 minute from now
show the movie schedules with animated movies around here
find movie times 
play some music from 1985 by rolf harris
find the album just for laughs
will it be warm in the current place next spring
show creativity of what is dead may never die
rate battle hymn of china five of 6 points
can i get showtimes for films in the neighborhood 
book osteria restaurant for 1 person in mi 
will it be rainy in malta
give after having spent a night among horses 0 out of 6 
i would rate this book chronicle  3 out of 5 stars 
can you play maggie mae on netflix
i want to book at a pub with parking in cuba 
find the nearest movie house for the mystery of picasso
add heat of the night to my novedades viernes sudamérica playlist
show movie schedule of films in the area
what system is bloodhounds of broadway the game for
hows the weather supposed to be on april eleventh close by lyons ferry park
will there be a blizzard in chapel point state park or in the same area
the last essay is a 2 out of 6
play dhafer youssef top-twenty on netflix
when is that forward center died at dawn playing at the closest cinema
add this album to my us latin top 50 palylist
can you add something by vikki thorn to my lo mejor de los 80 s playlist
i d like to watch monk comes down the mountain
is it supposed to get colder here on 12/28/2019
give 5 out of 6 points to short trips: a universe of terrors
tell me what movies are showing at seven am at the closest movie house 
tv series for the thirty nine steps
where can i find the album the adventures of lolo ii
add the tune to the indie workout playlist
play music from 2007 
in eight years and a half from now i d like a reservation at a top-rated bar
find a tv show called ace of spades 
book a stuffed ham serving pizzeria in independence corner
add a bum note and a bead of sweat to my stress relief playlist
find a painting called the book of folly 
what time is the bride’s journey playing at star theatres
play the cherry-tree carol by edwin mccain
play my funtime playlist on lastfm  
book me an indoor pub in jersey
reserve a table for nine people at a caribbean restaurant in white creek  utah 
book a reservation for a restaurant serving burger in malaysia
i want to read the book between a rock and a hard place
play some 2002 music
find mother earth  a tv show
read the book journal of the bombay natural history society
estelle should be on my spring playlist
this textbook only gets two out of 6 stars
rate this current essay a zero 
i want to play the game show me the wonder
whats the movie schedules for animated movies close by
is it nice in pw
find half a sixpence photograph
i need movie times for movies in the area
add el noi de la mare to the new waltz playlist
will be warm in hallwood  kosovo
play the lousy dance trailer
please include emily remler in indie bluegrass
add the “chirping” crickets to my mellowed out gaming playlist
find the tyrant
can you tell me what the weather is doing in north epworth  guam
rate the knife that killed me a three
will it be warm at mountainair
play i believe from chico buarque off of iheart
tell me the current forecast for switzerland
show me the movie schedules for animated movies around here
show  of from south africa to south carolina
add alexandra govere to my anochecer urbano playlist
what will the weather be in angle cape verde at midnight
please play some black metal music
what s the weather forecast for here on jul  23
play a sixties song by classified
play opera music on google music
book a table for 7 at a churrascaria that is highly rated
find a brunch time cinema nearest with the president is coming
i d like to eat in montana on 10/22/2030
add bright and breezy to my this is gucci mane playlist
rate the previous essay four of 6 points
i want to eat louisiana fried chicken in mccoll  ia
find saison 7 de sons of anarchy
i want to hear that track from 1991
play instrumental pop
what is the cold forecast for our current position
add welcome to the cruel world to my reggae classics playlist
when religion becomes evil is only worth 1 stars
add gary valenciano to the power gaming playlist  
i want to book a highly rated fast food restaurant now 
show weather forecast in kenya
i need a book called student demonstration time
play a record from 2005 by ruslana lyschytschko 
play ramakadha by karl davydov please
open deezer and search for scott miller and play some of his new songs
how hot will be there in kanwar lake bird sanctuary tomorrow
find manthra mothiram at century theatres
find the saison 7 de how i met your mother show
put this kan mikami tune on fresh finds cyclone
i d like to watch movies at the closest movie theatre
find the work compiled fragments 1997-2003
find a photograph called free the universe
please add a tune by kaori utatsuki to my korean osts playlist
add kisaki to family road trip playlist
what time is too young to marry showing
play steve harris false gestures for a devious public album
add toi to my timeless love songs playlist
tell me the weather forecast thirteen seconds from now in ukraine
add the go find to sólo para dos
will it hail in 1 second on riceboro delaware
please look for catch a falling star
add a track in nike running tempo mix
is it windy in custar
book a brasserie for seven in west yellowstone
find the novel make peace not war
tell me when it will be warmer in woods hole  oklahoma
add días felices to my todo reggaeton playlist
i need a cambodian brasserie restaurant that is top-rated
what will the weather be in mascoutah  tanzania at 09:04:38 am
will the weather be colder in naguabo four minutes from now
how hot is it in pesotum
find films scheudle in the neighborhood at 2
put this whole album on the playlist called old school metal
the young lion saga gets a solid 4 points out of 6 
find me the movie schedule for arclight hollywood
can you give me weather details for my current spot
book a table for seven in a pub in iraq which offers gluten free food about 141 days from now 
play some armik from the fourties
need to book a reservtion for a restaurant in maryland for me and my half sister
find waiting for touchdown  a book
find the modern world video game
what will the weather be like in three weeks in gates michigan
play the latest thelma aoyama
what cinema is playing great guy
add to laundry playlist with this song
what will the weather be like in twenty two minutes at san pasqual battlefield state historic park
i d like to eat at a restaurant with wifi
add maggie mcgill to my night vibes
can you place a reservation for me at ariston cafe
play music by young steff
add to my playlist heavy gamer the name blaydon races
i give the following saga a 5 
find movie times 
add guy warren to my bossa nova dinner playlist  
add this rob campanella tune to psychedelic rock
rate a spot of bother 3 stars
find movie schedules for close by films 
what will the weather be like at me current position in seventeen seconds
what s the weather in heritage hill state historical park
play a record from 2015
i want to find the show called fresh aire 7 
please find the movie  a jingle with jillian 
what films are scheduled around here
is it better in holi or here
book a restaurant in geddes on march the twenty-seventh for me and my husband
rate cold comfort farm a three out of 6 total
what is the weather in gem
add this track to downtempo beats
add vintage 74 to my mother s  primavera sound 2016 barcelona playlist
i want another song in the women of latin music playlist  
add quicksand to my valentine s day love playlist
i need to know when sensation in morgan’s creek is playing
need a table now somewhere nearby petit manan national wildlife refuge
add this artist to my playlist named funtime
search for the game the last horror movie
rate the crocus list five out of 6
look up the brave archer 2
give one / 6 points to who will cry when you die
please book reservations for 3 people at a restaurant in alderwood manor
please find the tv series back to bach
rate this essay 3 of 6 points
find the show portrait of countess karoly
i need a reservation for the original house of pies with three people in plandome manor pa
add this artist to dubstep
use netflix to play in the arms of a woman playlist
i m trying to find the show chant ii 
give this series three points out of 6 
what s the weather in parthenon
i think this novel should get 0 stars
i would rate this current series i m reading a two out of 6
look up adobe brackets soundtrack
play any album from the twenties
find a popular diner that serves brazilian close by oklahoma for nine people  
add jarvis cocker to my chillin  on a dirt road playlist
book a restaurant in north dakota for my child and i on november seventh  2037
i m looking to book a table at a gastropub that serves vegetarian for me and my team
book a table for six at hubbell house in ne
rate the fairy caravan 5 of 6 stars
give mason & dixon a rating of three 
i want to eat panisses the nearby cafeteria in naytahwaush
add spanish castle magic to daily lift
rate the a-z guide to arranged marriage 0 of 6
play some mike porcaro
book a table for vermicelli at a restaurant
add this artist to spain top 50
please book me seating at the food court in hazel green for nine
what is the forecast for papua new guinea for lunch for rainfall
rate this novel a 1 of 6 for me
this current essay deserves only a three rating
put some mac wiseman in my latino caliente playlist  
find the covered wagon  a game
what s the weather in waretown lebanon
show me the painting called the descendants 
can you make an addition to the old enough to enjoy this playlist with martin barre
play a sound track by mac dre 
book a table in california for rita and brenda at hurley mountain inn on january the 11th
play 1958 by wayne petti
find a reservation far from my work location in eight hours for 8 people at union auto company
my great grandfather and i would like to get together at a taverna 
can you find the trailer for the young martyr
i need to find the creative work wave
give grand conspiracy zero out of 6 points 
show me god bless the child photograph
play itunes  songs by gerard way
reserve a table at a top-rated restaurant for dinner in twelve hours  
add tracy chapman to late night jazz
play some 1991 dave barker
add the spine surfs alone to my playlist called the funny thing about football is
will there be s snowstorm at my current location this week
add yuna ito to my cena elegante playlist
i want to dine in luray
find a book called environment and behavior 
can you play under the anheuser bush by pete doherty
show movie times
check the forecast for orson for around 9 pm
play some mark tremonti from the thirties 
add potje met vet to my electronic gaming playlis
add antisleep volume 04 in all out 70s playlist
i need a reservation for eight at the original soup man in northern mariana islands
i need to book a table at bridge round house in south dakota for me  emily and gena
book a brasserie in cuney for seven people 
add keltech to my 70s road trip playlist
play the trail of the lonesome pine on netflix
add this song to the pre-party playlist
find me the show krypto the superdog
what will the weather be in romania at 4
play the most popular song by espen lind
what kind of weather was forecast near harmony flats nature reserve last march 
book me a table at a top-rated tea house in suriname
please add john deacon to the funtime activity playlist
play the artist joe
add this song to my metal playlist
rate the costs of accidents a three
i give the beatrice letters 2 out of 6 stars 
i d like to see forgetting the girl 
i want to book a restaurant for 6 on january third within walking distance of northvale
is it forecast to be stormy close to nimule-nationalpark 1 hour from now
play my under the surface playlist 
book a table for three people at john pearson soda works in mauritius 
tell me if it ll be overcast nearby papua new guinea
rate understanding physics 5 out of 6
please play something on last fm
give one out of 6 to a week in the woods
could you play the album b men gahō by nathaniel shilkret
play symphony by josh gracin on slacker 
what movie is playing at showcase cinemas 
list movie times at cinemark theatres
play music from lastfm and deezer 
rate this novel one out of 6 stars
river secrets deserves a best rating of 6 but zero points
what times is the 7 faces of dr  lao showing at united paramount theatres
i want to give among the enemy 4 out of 6 points
what will the weather be like in the falkland islands starting may 25  2022
book a reservation for a trentino restaurant in kansas
book a restaurant for one in skillman
play the newest melody by cisco adler on pandora
rate the cry of the owl a four
what films are showing in the neighbourhood
book me a table for five at the top-rated morocco restaurant 
rate the autobiography of alice b  toklas 1 out of 6 stars
what is the sri lanka forecast for snow
play chant on groove shark from 1996
i want to add a song by w c clark to my nerding around playlist
what s the weather in oregon
play music on my itunes
what is the weather in neighboring oh
what will it be like in the current place at midnight
book a food truck in argusville that has fish chips
add rattus at the roundhouse to my funk playlist 
rate the beyond this place chronicle three of 6
add song to my mellow beats list
play me a mario vazquez movement
add adam yauch to my spooning
i need to find the so nice soundtrack
play dj subroc on itunes
weather for nearby roselle
play a sixties track by noam pikelny on iheart 
book a table for eight people at a bar that has steak sauce in half moon american samoa right now
where is the adventure of the yellow curl papers playing
the dubstep dangles dirty playlist needs digital at montreux in it
i need a reservation for a restaurant close by their hostel 
make me a reservation in nh for a party of two at a restaurant close by
add so far to my retrovisor playlist  
go to attack of the planet smashers
showtimes for animated movies fro goodrich quality theaters 
i want to book a tea house for 4 that serves madeleine
where can i watch the television show you make me hate music
movie times at cooper foundation for sunset
i m in bowling green  please book a restaurant for 1 close by 
what kind of weather will be in va 12 years from now
add sirusho to the 50 clásicos playlist
play magic time by phoebus
the book as sure as the dawn gets a two out of 6 rating
please make reservations for me and my roommate somewhere in bouvet island
find a game called the guyra ghost mystery 
add this alan wilson track to my this is luis fonsi playlist
will it be warm in cotati in guinea-bissau
i want to listen to a popular melody by david bazan
what is the forecast for sanibel
add el pavo dustin to viajes
put four in blue onto ultimate 00s 
i need a reservation for claudine  kelsey and shelley at a restaurant in palestine 
book a spot for five at a brasserie on jan  7  2023
put jazzy b on lazy chill afternoon playlist
what s the weather forecast for sweden on oct  the fifth
give the current part of the series 1 points 
will it be colder this saturday in nc
what time is three cuckoo clocks playing
play trace adkins  music from the thirties 
i want to hear a track by ryohei yamamoto on vimeo
show me the picture sex and drugs and jesus christ
i am rating this book titled the billion dollar ransom 3 stars 
will it be colder 1 minute from now in jersey
can you play something off johan larsson s travelers and thieves
i need a list of places in the area  that i can see animated movies in six minutes 
play mea culpa by rahim shah
what is the weather forecast for laos
find welcome to the el-palacio  a movie
book rosalie stewart and evelyn at a restaurant
add track to all out 70s
tell me the weather forecast faraway from tx
i want to book a pub in ms that serves festoni
what is the weather in arkansas the city of morrison
i d like to watch films at marcus corporation at twelve p m 
play me some music from 1999
where can i watch the tv series the trifecta
find a picture called cahoots
give zero star for current album
give the dark abode chronicle 2 out of 6 points 
play some fourties music on zvooq
will it be hot during winter
weather for oct  16 in mo
book bullfeathers
add salil chowdhury to my 35 soul classics 1970 to 1975 playlsit
rate my current textbook four out of 6
on dec  13  2018 i need a reservation for four in arizona
i d looking for the saga playcanvas 
weather for six am in sc
book a table for 1 at a restaurant
what will the weather be in fl on 1/11/2030
will it still be warm nineteen hours from now in pa
i want you to add a george chisholm tune to my 40 hits playlist  
play the song evocation i – the arcane dominion
search for ayumi hamasaki countdown live 2007–2008 anniversary song
i want to hear steven harwell from the thirties
give portions from a wine-stained notebook: short stories and essays 0 points 
find journal of the society for american music
one stars for the following album
show me the movie called people and masks part 2
add album to feeling blue
rate the black mask 1 of 6 stars
where is the nearest movie house that is playing sirivantha
i m looking for the birth of a nation
tell me if it ll be colder next november in granite-steppe lands of buh
what s the movie schedule for b&b theatres
please find the movie schedule for animated movies playing in the neighbourhood 
i m rating the skystone with three points
add dan the automator to forever country
show song schedule of shoot for the moon
play the album  dance hall at louse point 
find a reservation for a tea house in lorain
add all bad to the summer of love playlist  
play something from my songs for you  not your parents playlist
rate the war of the roses 2 out of 6
play peja tunes
put mike mccready in the kitchen swagger playlist  
rate this album one value
add ray noble to my chill vibes playlist 
i rate the book rusty string quartet a 4
i want to hear music from the lotus flower album by andy mccoy
please book me a reservation this year for a restaurant within the same area of my office
what films and movie times are close by
is the films 19 hours from now playing at landmark theatres
help me find the work graphics animation system for professionals
i want to see the happy thieves at marcus corporation  can you show me movie times 
look up the making of milwaukee
i want to book the commons restaurant for five on dec  the eighth
is the strange case of the end of civilization as we know it playing at the movie theatre
add this tetsuya komuro track to my soulful disco playlist
rate encyclopedia of domestic animation four out of 6 stars
rate the current essay zero stars
play me a song by hank thompson from moa anbessa
use groove shark to play music from the nineties
is love coach playing at speakeasy theaters
rate the next book four stars
what films are playing at the closest movie house
rate this series one of 6
find the schedule for the cup winner at the closest movie house 
i want to hear gothic rock on lastfm
give this album four stars
show me skyfall: original motion picture soundtrack  
is a man called hero playing during brunch at the cinema
play the newest ballad from chad urmston
rate this book a zero
show movie times
play white noise 
find a television show called the high chaparral 
i want to hear choice on last fm from the twenties 
book a restaurant table at the food court in the spa sixteen hours from now
find the game blogbridge
rate wolves eat dogs 5 out of 6 points
book a restaurant in hi
add little musgrave and the lady barnard to ora s punk rock workout playlist
i want to hear dido from 1966 on youtube
is it going to be warm here for brunch
play a top-fifty 1965 album by ski
rate the current novel two points out of 6
book a spot for nine near togo
i would rate the story of the glittering plain a zero
rate theodore boone: the accused five out of 6 points
can you play a song off the album  jungle
what s the forecast for mt next week
holly and brittany need a reservation for a sardinian tea house close by co
play roy orbison tunes now
rate the postman always rings twice zero stars out of 6 
look for the journal of toxicology and environmental health soundtrack
need table for two in pleasant city
i want to book a popular fast food food place in mn for my friend and i 
will it hail in 1 minute in toms river
add this song to clarice s latino caliente playlist
what s the weather forecast for delaware right now
rate the white abacus zero out of 6 points
forecast for laguna heights barbados
what is the forecast for 8/26/2022 in vermont
please play a song off the curtis lee album rough diamonds
i need to know what the weather will be like in gradyville at breakfast  in the state of colorado 
is it sunny in qatar
book a table in alberton for me and my mother in law at a restaurant
what movies are at the nearest movie house
when is old enough showing at the movie house
play dancing through life by ronald isley on spotify
play some seventies dj colette
for the current essay i give a total of 1 stars
where and when is unleashed – entfesselt playing
show the best of minnie riperton saga
i d like to play the album beloved rogues
book a reservation for nine at an outdoor restaurant
what is the weather forecast for east cleveland  republic of the congo
what time around here can i fins animated movies
please find movie schedules
give bruce lee: the man only i knew 5 points 
let me know when i can watch actrices 
show the movie schedules in the neighborhood for animated movies
rate the simon & schuster encyclopedia of dinosaurs and prehistoric creatures 0 points 
rate this textbook 1 of 6
rate measuring the world one points
play a song off the best of siouxsie & the banshees by faustino oramas
please find me the work  ace of spades 
add track by klute to winifred s de camino a clase playlist
i d say life in the iron mills was a five
can you put this xandee song onto my chill playlist
i want to book an indoor brasserie within walking distance in me 
play the newest released song from 1951
can i see the tv show the closer i get
give 2 out of 6 points to current essay
is the skull playing at loews cineplex
play my new indie mix on google music 
where is feast ii: no limit playing
i want to hear something eclectic
will it be rainy faraway in charleston lake provincial park in 13 hours
book coney island neighboring va for marina and i 
play the playlist gypsy swing
rate this current novel 5 points
rate this book chronicle 1 points
find the television show birth of the cool
when is man in outer space playing at megaplex theatres
find a song called in your eyes 
i d like to see the show migration
add the name not fade away to the playlist the midnight hour
lets go eat this fall at any restaurant that has parking in finland
i want to give the current saga 0 stars 
add this album to digster future hits
find movie schedules for animated movies around here 
rate my current essay zero out of 6
book a table for 0 pm in fayette for rachael morris and shannon near there
book reservations at a restaurant in ne for 4 people on apr  2  2021
find the schedule for brick 
book a restaurant with a pool with alta  deborah and bertha in ia 
play a music theme by anna nikolajewna jessipowa
what is the current selling price of the novel the sims 3: island paradise
rate the current book a zero 
add the time warp to wild & free workout
is the lady and the highwayman playing at 7 a m  at dipson theatres
will it be rainy nine weeks from now close to the matlacha pass national wildlife refuge
book a brasserie for 3
show movie schedules for fox theatres
remember the city nets five out of 6 
payette national forest is cold weather and have lunch within walking distance
play the album making evening and night by cevin key 
is there going to be a depression in my current location on nov  the ninth
what is the paranormal activity: ghost dimension album
find a movie called the easy way to stop smoking 
what are movie times for animated movies close by
check the forecast for zena  arkansas on last day of passover 
will it be stormy in saint pierre and miquelon in the city of wenham
is it going to be chilly here
play the instrumental study on vimeo 
book a spot for ten in morris ranch sd on nov  the twenty-second  2023
book a restaurant for ten people 1 second from now 
rate she: a history of adventure a one of 6
give 2 out of 6 to smoke in the forest
taken at the flood only gets 2 points out of 6  
i want to put sons of the sea on the pulse of americana playlist
add shelby lynne to my playlist this is luis fonsi
can you look for the creative work called no gravity
rate breakheart pass two out of 6
add a song to the para dormir playlist 
add georgetown university alma mater to my evening acoustic playlist
tell me if it ll be freezing next month in rhode island
tell me what movies are at amc theatres 
where to buy video game of think fast
can you pull up the television show called electric boogaloo
is the forecast windy in nigeria on nov  the 6th
i need the weather in muncie
can you book a table for a party of 6 close to dekalb av
give 5 star to the book the knight of newts
show the blackberry bush show
open groove shark and play jason mizell
i want a table for 4 at any kind of goiano bar
please inform me when i can see the abdication at a movie theatre 
i would like a cafeteria at 10:41:51 am for seven
what will the weather be in croatia
make a reservation for hillary  dina chavez and alexis
give this novel a rating of 1 points 
i would like reservations for cliff house in seven months for six people 
play the track fight on  state by yuvan shankar raja
i would like to book a frozen yogurt restaurant for one
what animated movies are on the movie schedule close by
find the movie schedule 
what is the weather like now in washington
what s the weather in ri
play noctámbulo pl
what is the forecast for my current place at 23 o clock
when is the pirate fairy playing at amc theaters
find a novel called testing anywhere 
find a movie house with hollow reed
play me a tune by john clayton
find movie times for b&b theatres 
add an album to my week end playlist
what are the movie times for malco theatres
give me the movie schedule for films in the area 
play ballad music from 1958
play classical x
play david banner on netflix
show creativity of novel lock
tell me the forecast in the same area here on robert e lee s birthday
please play something that s freak folk on google music
show creative labor notes
show the movie schedule
find the trailer for bill cosby presents the cosnarati: state of emergency
play some sixties music
show me cut the rope video game
play the song victim of changes from hawkshaw hawkins on spotify
is this film going to be at malco theatres
i want to book the black cat bar in ar
when is the naked eye playing at the closest movie theatre
rate the book now and forever 1 out of 6 points
can i get the showings for films at the nearest cinema in 1 minute 
will it be colder in winnebago
search for the video game the book of heroic failures
find me haunted castle
add showcase in a suitcase to the chill out playlist  
play some gospel music 
get me a table for one  at a popular brasserie
i need a reservation for the smoking room at a fast food place for 8 people
play the song drifting on a reed by bobby g
where can i watch the mark in a cinema
look for the editor & publisher tv series
book a restaurant for a party of 7 in paraguay on saturday
play rob dougan on youtube
find the photograph move any mountain
does pacific theatres have animated movies starting in 1 minute
what will the weather be like in fourteen hours in eastville
play some nineties eliza carthy
i would give the book lavender and old lace a rating of three
rate this book five of 6 points
show me the photograph a woman from the street
play paul ortiz music from 1990
i give the journal of a sad hermaphrodite a 0 out of 6 points 
rate the man from the ussr and other plays a 0
where can i find the painting rss tracking
book on feb  the twenty-sixth  2026 in tracyton for two at a cafe
can you find me the work  frisbee: the life and death of a hippie preacher
find movie times
rate lone wolf 3 points
will it snow in my current location
play some maynard james keenan songs from scenes from the big chair
will it be overcast in my current location at twelve pm 
what will the weather be in four weeks around tsingy de bemaraha strict nature reserve
add let the season in  to my  lo-fi love
is it windy in june park
what movies are going to be screened at caribbean cinemas at fourteen o clock
i need to know the weather for san martin
add kd lang to my deep focus playlist
what is the october 19th forecast for iran
where can i buy the something borrowed saga
what s the weather in mettawa oklahoma
book a table for me and my crew scheduled for 10:47:15 pm in il 
rate the book the guernsey literary and potato peel pie society a five
can yo find me the game a silence that screams
add flying to my women of rock playlist
play the top 1991 sound track
make me a reservation for a party of 6 at a pub at five o clock in arizona that serves waffles in the city of hat creek
will there be fog tonight at beamer memorial conservation area
i d rate this book 1 of 6 stars
tell me if it will be hot on jun  the 10th in san de fuca  sweden
play a symphony from bob hardy please
how do i get the soundtrack for hearts of fencing
look for the compact forest proposal trailer
add rev-raptor to 90s indie
add ghost on the dance floor to my autumn lounge playlist
what time is tasher desh playing at the nearest movie house
weather for afghanistan in one minute 
i need a table for six pm for me and my step daughter at cafe rouge
what is the weather forecast tomorrow in french  ut
play me a song by steve hackett from manuel
add thomas a dorsey to my big band
i need another artist in the romántica playlist  
will it be chilly in milligan college  ak on law day
i need a restaurant for a party of three
play some john oates on youtube 
play the greatest vimeo tunes by angelo amorevoli on soundtrack
is there a chance of hail in holiday hills
add my very best to my road trip playlist  
is it going to be warm in cottageville
i want to hear music from the sixties 
add the yumi matsuzawa album to my sexy as folk playlist
show me the work the catholic weekly
can you please assign two points to the white niggers of america chronicle
please find the closest cinema that s playing movies at 9 am
play music by daddy yankee
book a food truck in nisswa for 4 at 5 pm
play music from 2011 
where can i watch willy wonka & the chocolate factory
add sveta ljubav to my metal party playlist
rate dragons of a vanished moon 1 of 6 points
rate decoding reality 0 points
play the last rocko music with deezer
can i get the movie schedules for marcus corporation 
what s the forecast for il around tea time 
play jono el grande from the thirties
rate this essay a 1
find a table for 7 at a joint in ok that s far from here
i give the current book two out of 6
tell me where i can watch common law cabin
find a trailer called peggy sue 
search for the exiles of time book
where can i find sebastien grainger & the mountains
i need a movie schedule for nearby animated movies
what is the movie schedule for cineplex odeon corporation
find movie schedules 
add bulat schalwowitsch okudschawa to retro pop
i d like to put ryō yamazaki onto my sylvia plath playlist 
play skin & bone by jess stacy on deezer
book a maharashtrian restaurant please 
what time is the lottery man playing
will it snowstorm neighboring the rio grande wild and scenic river on feb  the second
please let me know the weather forecast in louisiana state
put this artist in pachangueo total
play the catholic sun album
rate this album 2 of 6
for my té para tres list add cut the world
find the mary van note show
what is the weather forecast 131 days from now in atanassow-see
can you play deezer from 2007
make a reservation for 7 people at a gastropub on isle of man 
rate this  textbook 2 of 6 stars
find a table close by in the downtown area for sherri and i
add this song to my playlist named britpop  etc
add the song by brian larsen to the cardio playlist
i d like a table for three at black rapids roadhouse on february 24th  2039
book reservations at the laurelhurst theater for a party of 7
i want to book the best steakhouse with south american cuisines in alaska
find a united paramount theatres and movie times at 4 a m 
will it be stormy in charleston
get me a table at prospect of whitby in blaine hill  id
i give the following part of the series one out of 6 
play the music from the playlist get lit
i want to book the clarke cooke house in uzbekistan
look for the kiss the girls game
please find me the work  instrumental directions 
book a restaurant in michigan for 4 people 
i m trying to find the game called give me my remote 
table for eight at the berghoff in sistersville in jul 
what s the forecast for sai thong national park at 02:59 pm
add track 70s smash hits to my
put kurt cobain onto korean osts 
list movie times at general cinema corporation
is it cold in pw
play a track by ishmon bracey on iheart 
play socialism is good by terje bakken on spotify 
i want to book a spot at the local food court
when is dead birds playing
i need a weather forecast for laos at one am
show the swan princess
give 1 stars to book mr ponsonby
find the closest showing of the taste of others at a cinema
add a song by  mark schultz to my ultimate indie playlist
what movies are at loews cineplex
play dick marx
what movies are playing in the area 
i d like to see showings for all the way home at kerasotes theatres 
give me the weather forecast for the city of archie
is gods of metal playing
tell me the weather forecast for azerbaijan
rate the eighth day three stars out of 6
book a reservation for a pub serving gateau in ms
which movies are being screened around here
assign 0 points out of 6 to the gate of worlds
give me a link to the saga called copper – justice is brutal
add ivan mane jarnowick to fusion fest
what movie theatre has a matter of wife    and death
book cova in frisco city for me and therese at eight pm
find the schedule for movies at harkins theatres 
the feel good indie rock playlist needs another song 
please book me a restaurant reservation at first watch in douglas  maine 
give death on the nile a three
tell me the humidity index for elizabethville  indiana
play chant music by david cook
give the current album 1 star
book a restaurant for 4 that s not far from ca
rate bestiary of dragons and giants four of 6
i d like for you to add owen biddle to my old school death metal playlist 
play some music from 1993 on itunes 
can you let me know when troopers three is scheduled
will it be sunny on june 1  2021 in bathgate
i rate this essay a four of 6
i d like to watch the tv show hola mary lou: prom night ii
will there be fog on march 3  2038 in bonaire
book the light horse tavern for 4 people 
find a television show called servidor apache 
find the schedule for films at the douglas theatre company 
add best of uetoaya to wild country
find movie times for century theatres 
play apbl98 by alden penner 
find face the truth  a tv show
what are the movie times of films in the neighbourhood
i give the flash series 0 out of 6 
rate the book whit a zero
add kloden drejer to my listas de éxitos playlist
when can iw atch great balls of fire - vampate di fuoco
where is the closest movie house playing films now
tell me the weather forecast for apr  twenty-fourth  2028 in san diego
can you locate the novel  ismol family
book a spot for 6 at a gateau restaurant
for this book i rate four points
rate the why is sex fun saga two of 6
in the neighbourhood find movies starting in thirteen hours
rate this textbook a 5
find home fires
what is the coulee city mt forecast
rat the current textbook a two out of 6 points
i want to book a restaurant in bosnia and herzegovina 
i m looking for the show pulse 2: afterlife
play music on last fm
can you play the greatest sarah brightman song
i need to reserve a table for my baby and i at a tibetan tavern
i would rate the codebreakers a rating of 6 and a value of 2
find a table at a joint with northern brazilian food in ga
where is the nearest movie house that is playing teaching to see
give one to this novel
show the blue meaning television show
what animated movies can i see at malco theatres
what will be the wind speed around pembina gorge state recreation area october the 27th
add the artist gougoush to the soul revived playlist
book a table for 5 at a pub during my macedonia trip that serves czech food 
i want to find the very best of chicago: only the beginning
play greatest chant music from beni arashiro
what is the weather like in montchanin  nv
find animated movies nearby
add artist abdel halim hafez to my conexiones playlist
i m in tuolumne city and want fast food for a party of eight 
what is the weather like in phnom sankos wildlife sanctuary
make me a reservation that serves kebab at a delicatessen in ambler
can you find me the assassination of jesse james by the coward robert ford saga
book a bakery that serves souvlaki for tomorrow 
give this saga a 4
what is the weather forecast for kinbrae
show me the photograph rock you baby
take me to the top-rated taverna in sealy for trattoria next week for 5
put this tune on guest list take
rate the current essay 5 of 6 points
play a song from helena iren michaelsen on spotify
book now at a bakery at a spa
will it be warmer at sunrise in jeffrey city
play playlist riveting 
what will the weather be at noon in durbin oh
what do the movie schedules at b&b theatres look like
find a television show called tiny dancer
i want a table for eight in yakima rhode island
list all the movies playing in the area now 
can you put this track onto classic jazz funk
please add chris frantz to pop rising list
show me the schedule of dead snow
what is the overcast forecast for torrey pines state beach
will the weather be warm far from niger at 15 o clock
i want to listen to the soundtrack and then there was light
i d like to watch movies at amco entertainment
rate the next essay five of 6
i d like to eat at the best restaurant in coalton
when was the album start a fire released
play music by artist mark ashley
i want to play the game guitar heaven     the greatest guitar classics of all time
what s the weather in piperton rwanda
add lisa to my playlist street dance
show movie crossgenesis
add the artist to my southern gothic playlist
what is the weather forecast for new mexico
play a sixties song 
search for the dark side of the mind movie
show the minutes to midnight photograph
is it warm in califon  tunisia
find movie schedule in pacific theatres
i rate the current textbook a 0 of 6
put journey to love onto hip hop 2017 new school 
i want to view the picture in old monterey 
rate witchcraft and paganism in australia 1 points out of 6
search for the painting smart money
show me the schedule for arclight hollywood for animated movies
put the broken wave on lo más dance
play the sound track by ferry corsten
tell me if it ll be humid at eighteen o clock in my current spot
play me a song from 1976 by bennie moten
give the cia and the cult of intelligence a rating of 5 
find a show called in fondo al buio 
what will the weather be like in farmington canal state park trail
i give this book a 3 out of 6  
add driven to tears to the viral semanal playlist  
play the top-20 rita macneil songs
book a reservation for 2 at a food truck with pool in new york
give me the movie times at warren theatres 
book a table in glennie for 1 in the northern mariana islands
put sonntagskind onto the playlist called soulful disco
book a spot for seven at a bar with chicken french
please book a restaurant for party of 1 in seeley lake on july the fourteenth  2022 
i think this essay should be given four points and a best rating of 6
what s the movie schedule for animated movies in the neighborhood
book a spot at the red onion in san marino for next week
add this ricardo villalobos track to under the surface
i am looking for the tv series strays
give the current novel i am reading a five stars rating 
at 11 am will there be a snowstorm in fort pulaski national monument
i need to book a tropézienne restaurant six hours from now
what s the weather forecast at sixteen in oklahoma
find the creative work brilliant tragic
please get me stories from the english and scottish ballads show 
rate fast food nation 2 points
play music by susumu hirasawa 
add stephanie mcintosh to i love my 90s hip hop my playlist
book childs restaurants in bruno for 1 person on october 6th  2019 
give 0 rating to she and allan book
is it going to get hotter at the halfbreed lake national wildlife refuge
will there be a lot of wind far away from here on sep  the twenty-third  2021
rate this essay four out of 6
add visible wings to my playlist entre los andes
will there be a snowstorm around eight pm in reed island state park
rate this essay four out of 6 points
need a resevation for a cafeteria stle restaraunt in the country of liberia for a party of 10
will the weather in falcon heights call for rain
add tinker  tailor to my playlist titled this is trey songz
add this track to anne s playlist named just smile
i d give the mystery of the 99 steps three stars out of 6
add the album to my wild country playlist 
i give 1 stars out of 6 to this current series 
rate this album a one
what time does military history of african americans play
add this track to llegando a casa
can you play crossover
add this matt bachand tune to pure rock & roll
i want to see the local movie times
add la voce to my dubstep dangles dirty playlist
book a gastropub that serves pansette in skaneateles  pennsylvania
add gn to night vibes
book a steakhouse with a pool for eight people 
i would give things fall apart 3 stars
will there be a storm in aspinwall
add rakim y ken y to my gold edition playlist
add a rating of zero points out of 6 to the inheritance of loss
what movie house is showing sherlock holmes and the secret weapon
book me a table at a bistro that serves maple syrup for a party of 10
i d like to reserve a spot at a bakery in guyana in feb 
give 4 points to fight club
weather for cougar canyon wilderness
find the movie schedule at malco theatres 
where can i listen to the soundtrack of gibraltar: britain in the sun
book a molecular gastronomy serving restaurant on march the 20th
what movies are playing at the closest cinema
is the johnstown flood playing
can you find the painting shake otis at monterey
please find pretty baby
play some music from the twenties 
i want to read the novel alone at the microphone
i need a restaurant that can seat 3 in cochran that has wifi  
i want to see everytime we touch which is a painting
play music by shinji miyazaki
add d roc the executioner to my this is zezé di camargo & luciano playlist  
show saison 5 de game of thrones
book a restaurant for four people in wylliesburg 
show weather forecast in west crossett luxembourg in fourteen minutes
play ngola ritmos top-ten songs
what time can i expect films to start at the bow tie cinemas
put live and rare into dancehall official
book me a restaurant in the northern mariana islands
i d like to eat at ten pm  anywhere neighboring to our house
i m looking for the saga the hardest part
i gave the current series 0 points
showtimes for animated movies in malco theatres
add tune to my playlist ironing
book a restaurant for 9 people 
rate this novel 1 points 
plpay the top ten track from asia nitollano on spotify 
add josefina pla to isabelle s guest list gamesradar playlist
i d like to see completely well
play songs by cheryl wheeler
i want to watch uproar in the studio at the nearest cinema
i d like showtimes for the story of wish you were here 
find the tv series the farewell tour
what will the weather be here on dec  25th
find films at showcase cinemas
find a tv show called the god boy 
is it overcast in brazil in within walking distance
what is the movie schedules for films in the neighborhood
will it rain today in circleville
add bad news to highway 61 playlist
can you get me a table reserved for three hundred thirty three days from now for eight people at a highly rated fast food place that serves north indian food not distant from moores mill
give me the movie schedule for cineplex odeon corporation
add jonathan arons to my indie electronics playlist
play the album the outpost
i rate a moment in time  a 5
give one out of 6 points to current series
i need to know what theatre is playing a happy coersion
please play a song by ahmad jamal
i m looking for local movie schedules 
rate this series titled adolf hitler: my part in his downfall two stars
i want to see the movie schedules for animated movies around here 
reserve a table in top of the mark lambertville  vermont 
book a restaurant that serves vezione verro one second from now 
tell me the weather forecast for cape verde
what time is the secretary playing at the movie theatre
i m looking to find suryavanshi 
what is the forecast this month  in kosovo
i d like the weather forecast for albania
play some dance on groove shark
plya a tune by kancherla gopanna from 1951 on zvooq
play music using groove shark
i want to give this book a rating of 2 points out of 6 
what is the weather forecast for la cienega
rate the current essay a three
look for little computer people
will there be snowfall this month in ut
find a painting called screen souvenirs
play an album from the fourties
book a table at a pub in china 
what is the weather doing in south carolina right now
book a spot at an osteria that has goiano in ward springs
add dr know to the playlist named i love my 90 s r&b
i would like a restaurant reservation for this year for 4 people 
she me the sons of satan praise the lord picture
add always to dena s baroque 50 spotify picks playlist  
is the little irish girl playing
what is temperature in benin now
add a song to my playlist black history salute
find movie times for movies in the neighbourhood 
will it be sunny in occoquan bay national wildlife refuge by tea time
will it be chillier on october 17 nearby east glacier park
add ava leigh to my grime instrumentals playlist
find captain kronos - vampire hunter 
i need reservations at a restaurant at 20 o clock in fm
add apathy to my electro sur playlist
will it be cloudy on sep  16 in palau
what movies are playing at amc theatres
can you put this song on the metal xplorer playlist
book a restaurant for ten people  
incorporate moribund the burgermeister into the 50 shades of love playlist  
what will the weather be on april 9  2037 in new brunswick botanical garden
i need the closest movie theatre playing incense for the damned 
add the artist jill vidal to my sinfonía hipster playlist
find friendship way
can you add this tune to the night out playlist
what films are playing at the nearest movie house
show movie schedule for animated movies in the neighborhood
rate this novel two out of 6
what is the tv show comfort
tell me the weather forecast for casa grande ruins national monument
rate this textbook four stars
how cold is it in cargray  argentina
looking for the trailer for shaolin temple
what movie times are harkins theatres
play a melody from the nineties on google music
give me a list showtimes for the night of taneyamagahara 
add a guy is a guy to the infinite indie folk playlist 
i d like a table for 3 at a brasserie in hillview ne that has mineiro
what films are there playing at cobb theatres
i want to give the pilgrims of rayne three out of 6 stars 
play some house music
where can i purchase the tv series the royal sessions
rate current book 0
show me the movie schedules for any animated movies playing close by
give five points to current textbook
i need to get a restaurant reserved in sd 
give this book a rating of 3 out of 6 points 
play me a song by avispa music from 1965
what films are at national amusements
book a northeastern brazilian restaurant for 10 am
will it get chillier in las lomas  british virgin islands on nov  the 21st
give 0 out of 6 points to this essay
rate the last opium den 0 points
add clem burke in my playlist pre-party r&b jams
can you play the wanderer and his shadow 
play isaac hayes on pandora from love  sweat and beer ep
i need seats for 6 at a place in ak
add track to novedades viernes sudamérica
play newest soundtrack from 2008
check the weather forecast for sappho
play the garden of allah  from wade mainer
rate the egg collecting and bird life of australia saga a one
show me the movie schedules
list movies for nearest movie house at brunch time
can you find a picture of the rambler
play me a song from movies for the blind on pandora
what s the weather forecast for devils den
i want to rate the current chronicle a two
help me find the work unite and win
book a spot for selma and molly at a steakhouse with saucisse that is close-by mcsherrystown
i want to book a food court  for 5 at 1 am
book in rocky mound for four 1 hour from now
can you find the tv show so what
show the chemdex com photograph
is it going to be colder in bonnie
book tun tavern for morning in norfolk island
give 3 out of 6 stars to the submarine caper chronicle
book for one in indiana at a restaurant
rate the sunrise lands a zero
i m looking for right on track 
is it going to blizzard at my current position
sort to the last song on playlist from 1983 a chant by mark oliver everett
add this tune by rafet el roman to my latin pop rising playlist 
add venetian snares onto the atmospheric calm playlist
rate this book 1 of 6 points
give me the schedule for getting there: sweet 16 and licensed to drive
will there be wind in loyola
in my playlist rock gaming add mariem hassan con leyoad
book a  table for 9  scheduled for april the 8th in nj 
i want to book an indonesian food truck 
play music using last fm
can you put live in detroit on the playlist peaceful piano
find the saga a very school gyrls holla-day 
find a movie called greatest time of year 
can you play an ep from the year 1958
what is the weather like now in ak
show me movie times at mjr theatres at 02:39:23 pm
add bossa nova soul samba to my jukebox boogie rhythm & blues playlist
play some jpop on google music 
i would rate this chronicle 4 stars
i want to listen to merrily we roll along by marko desantis 
find a soundtrack called the alice cooper show 
book a popular restaurant for two which is distant from avalon 
what time is stranger in town playing at the nearest cinema
can i get the showings for mysterious crossing
add song to thrash attack
i d like to go to douglas theatre company to see in beaver valley  what times will the movie be playing
i want to add a song to the sunshine reggae playlist  
add another song to the cita romántica playlist  
book a restaurant on martin luther king jr  day with parking
find painting big ideas
book a highly rated bar in burkina for georgia and i
show thousand miles movie
will it be chillier seven weeks from now in senegal
rate the current book 3 out of 6
book a table for 4 in california
i want to add lady maisry to my playlist lo que suena new york
i want jimmie noone on the playlist titled lo mejor de los 00 s
what s the nearest cinema showing the death of stalinism in bohemia 1 second from now
find the show titled hell on earth 2006
i would rate the chronicle the monks of thelema a 2
book a table for 10 people at dunbrody country house hotel in strandburg 
what will the weather be at thirteen in nj
book the boon brick store for nine people 
i rate the blood of others series only five points 
rate seeing the big picture a zero out of 6 points
pull up the video game  apothecary rx
add the essential jacksons to my perfect concentration
what is the humidity in missouri city sc
book a restasurant in pohick delaware 
rate the book the world is full of divorced women 2 out of 6 stars
where to get painting of channel 4 news
play top-twenty fourties movement music by mohammad reza lotfi 
is there an expected blizzard in brook  tennessee today
where can i watch chaos and desire
what weather is in saint vincent and the grenadines on thursday
painting of live from the el rey theatre
play a track by alpha blondy with deezer
does wildorado have a hot temperature
assign 4 stars out of 6 to the chronicle  god and man at yale 
play one good reason by tommy flanagan on itunes
evolution and the theory of games gets a five out of 6 
i need a table at t-rex for nine in brunei
what will the weather be like in 1 hour in bethesda
rate this chronicle two points
tell me if there s be a depression in brazil
find the book the crowd roars
rate the seventh decade two of 6 points
give zero point to this textbook
i need the weather for 7/13/2036 in gwynedd valley
what is the movie schedules at consolidated theatres
turn on last fm to listen to chara ballad from 1988
i want to watch the television show little things
find the ghostly swim 2 book
book me a reservation at a burger joint close-by choate on july 16th  2022
what weather will hi have will there be hail twenty one minutes from now
will you pull up my jueves de antaño playlist
when and where is distrowatch playing
please play a song for me from 1959
in nh will it be chillier in west york at noon
rate the overton window series a two out of 6
which animated movies are being screened at marcus corporation
give the current saga three stars
rate hunting and gathering a two
play me the soundtrack for nothing personal 
i want tanya stephens in my 35 soul classics 1970 to 1975 playlist  
the sleep machine rainforest playlist needs another tune
show me a movie theatre where screamplay is playing
rate the doors of perception 3 stars
what is the philippines forecast for humid weather
find vegucated starting at zero pm
book a table for june the thirteenth  2033 in saint barthélemy for 6 at an indoor tea house
will it be warm in gilmer  keeling islands
i want jean-georges for a party of 2
let me listen to rouhollah khaleghi on deezer 
when is the blue of heaven playing
what films can i see at malco theatres
book a brasserie for me and my team at four am
add concrete roots to punk español playlist
can you get me the television show called start it up
play these four walls by yummy bingham 
play some alternative music on vimeo
what films are showing at three o clock at the neighborhood cinema group
will it be foggy in 1 hour and 1 minute from now in ok
please reserve a table at the food truck in wheeler for december 4th  2019
find kb theatres with movies
the evil experiment gets zero out of 6 points
what s the weather forecast for sequoyah national wildlife refuge
add silver apples to teh sin estrés playlist 
i would rate the kid from hell a value of 1 and a best rating of 6
tell me the weather forecast for inniswold  réunion
can i get the showtimes for the scarlet and the black  at 12 pm 
what will the weather be like here on february 22  2024
is it hotter here on navy birthday
play the most popular sound track from the 2006
renee sanders  marlene and jewel want to go to a gastropub in the spa
find a painting called pulsions 
what will be the temperature 1 minute and 8 seconds from now in green bottom wildlife management area
i rate 4 of 6 points for this textbook
rate this book titled house of dolls three out of 6 stars
play music by country dick montana 
can you put falling upstairs on my playlist entitled this is thomas rhett
rate the fall-down artist 5 stars 
what films are playing at the closest movie house ar elevenses
add the album to my top 100 indie tracks on spotify playlist
tell me when it will be hotter in china
play the best songs by jes brieden
rate the current essay four stars
put this tune playing into my la mejor música dance 2017 playlist
add księga urodzaju to abigail s concentración
rate this textbook a four
is there going to be any snowfall today in lebanon
find flesh and bullets
book a reservation for 7 people at the french laundry on june the 8th  2029
they knew mr  knight should get out of 6 a rating of two
i want to hear sarban s greatest hits
the horrible book the black gryphon only gets 2 out of 6 
what movies are showing at the nearest movie theatre in 8 minutes
out of 6 stars i give the chronicle three and look forward to what s next 
find movie schedules for movies in the area 
book a table at one o clock at a bar that has parking
search for the album frog and the birdsong
zero points for birds of south asia  the ripley guide
what s the closest movie theatre that s showing dough nuts
what time is the nearest cinema playing the hopes of blind alley
find touch of eva  a tv show i want to see
when can i see red hot tires
play kings of the wild frontier by andrea bocelli
please look up the around the world in eighty days movie 
find a reservation for a highly rated brasserie for me and my step sister
add song to punk playlist
book a spot for 6 at a tea house in tokelau
book a tavern in colorado for two
what was the weather in my current position last october
where can i download the game miss robin hood
1 points for victory for us is to see you suffer
will it be colder in oswego 16 weeks from now 
find the schedule for fear chamber 
i want to hear something from post-punk revival
i m looking for the television show titled justice league
what is the weather forecast for moffett
what s the forecast for emily  florida for aug  17th  2020
rate my life as a book five out of 6
tell me if snow is in the forecast for teterville
add time flies 1994-2009 to the jazzy romance playlist
rate the book oath of swords three for 6
i give the tin can tree a five of 6
rate making sense of marx 2 stars 
give 3 out of 6 stars to this essay
add this artist to my morning rhythm playlist
give four out of 6 stars for this chronicle
find films in 12 hours at the nearest movie theatre
list movie times with meal
can you help me locate the game  coast
book a spot in 1 second that is neighboring robin s hotel
add a kanon wakeshima track to the feeling blue playlist  
what is the weather forecast for red rock lakes national wildlife refuge
i want to watch the tv show official detective
add como un tatuaje to my hits of the 70s playlist
i want to hear a fourties ballad by luciano
find the tv series the parent trap iv: hawaiian honeymoon
find warren theatres films
find a tv show called the fighting men
find a show called chompa toung 
show movie schedule in the neighbourhood films at five hours from now
add jack be nimble to my reggae bombastic list
please add something by steve freund to my this is luis fonsi playlist
find stained glass windows 
i d like a table for two at a place in west whittier nevada on indigenous people s day
add jeff burrows album to my country hits playlist
i would like to book a restaurant for 9 on dec  13
add rodriguez artist to my mujeres y hombres y fiesta playlist
what s the weather for mccracken in niger
find the photograph the air is on fire: soundscape
add koichi sugiyama to whm
will there be fog in fairwood
play some eighties movement music
give two points to wild blood
find the novel called loyalty 
play music by francis healy
add shake your rump to  my concentración indie rock playlist
what s the weather in belize close to ten pm
where is all night long 3 playing 1 hour from now
is it going to be snowy in ochopee massachusetts
include in my dreams in the this is new edition playlist  
what is the current place forecast
please show me the closest movie house playing wild on the beach in 1 minute 
i want to watch looney tunes platinum collection: volume 1 at a movie theatre
is it chilly in alaska
can super turnt up get added to my emotron playlist
find the rewind the film tv show
what are movie times for movies playing in the neighborhood
find the picture louder than bombs
rate the vanishing thieves 4 out of 6
find the novel what we did on our holiday
add album to my massive soca hits
when is one sunday morning scheduled to be played
play if you go
i give 4 of 6 stars for the saga a severe mercy
can you book me a table for 9 in de
what s the forecast for the weather at eight am in oxford
please put this artist into my lo mejor de radio 3 playlist
find next of kin
what is the weather in mascotte
show movie times at kerasotes theatres
play music off itunes 
what is the johnson creek forecast for chilly weather
add dean martin track to metal xplorer playlist
book for six on jan  18  2029
rate the current textbook zero out of 6 points
include hohenfriedberger marsch to my novedades pop list 
what is the movie schedule for films nearby
book a stracciatella provider coffeehouse  for 10
can you add psycho to canciones que lo van a petar
play odessa by maartin allcock 
i would like reservations to a popular pub in burkina for 10 people 
play music from alison sudol
play music by don reno
play the last 1957 movement
is it going to be humid faraway from here around dinner time
find a painting called songs from tsongas
find movie schedules for amc theaters
play the greatest melody from paul wright on pandora
what is the weather of pine city
i think that this novel should get 2 points and a rating of 6
play some music from the last album of 1988 on lastfm
play ebony bones on itunes
i think the dictionary of new zealand biography deserves 2 points
show creative album heredity
add album to my french n  heavy list
add pete shelley to is it new wave
i want to play the game the carny
find seduced by madness  a trailer
will there be a storm faraway from chapman ranch
add song to this is philip glass
what s the forecast for wendell
give 5 points to the white hotel
what was the weather last february in william a  switzer provincial park
go to cali fire and add refrain to my playlist
where is nichiren to mōko daishūrai playing
add inconfundible to stomp & holler
book at tavern on the green for in 1 minute in co
use pandora to play korean osts
reserve me a table a bar that serves african food for thirteen o clock for 1 in moravian falls 
play some contemporary christian on groove shark 
please get me the crime and punishment in suburbia trailer 
find the movie schedule for animated movies close by 
can you give me the forecast for 11 in bradner  ia
is blood is not fresh water playing at this movie theatre at 2 am
is it freezing near medley
play kaori mochida s most popular music on google music 
what is the 11 pm forecast for here and far
where can i view the photograph the phantom horse
play my mellow beats playlist please
play the playlist  hardstyle  baby 
search for big ideas painting
please tell me the movie times  
find the gamble 
what is the weather nearby bermuda a week from now 
ply best 1973 sound track
find the schedule for for corn at eleven a m  at loews cineplex entertainment 
what is the forecast now in duson 
i d like to see the picture teleform
find information about the album flipper city
add shooter jennings to the all out 70s playlist  
will it be windy in tequesta
give 0 out of 6 points to current textbook
what animated movies are playing at the douglas theatre company
look for the trailer of guitar heaven: santana performs the greatest guitar classics of all time
please make reservations for three at a kosher taverna nearby our secondary residence 
play music from hide
can you locate the saga for the ringo sheena discography
are there any animated movies playing at the closest cinema
put this song by rayvon on my all out 80s playlist
book a pizza serving tavern for me and my brother
i give emile  or on education five points 
find the real story with gretchen carlson
show famous classic tales television show
what is the forecast for temperate conditions in thailand in lopeno
how much sun will there be at 07:03:43 pm  in jones chapel
what is the weather forecast for my current spot on jan  third  2036
will it be cold in allardt  aruba
rate the current book series 4 out of 6
book a table for 2 at a highly rated restaurant within walking distance of taverna ok
find a novel called a perfect day 
mars probes gets a 1 rating 
play the newest sound track from the thirties
book a table for my granddaughter and i at the restaurant  
book the crown at whitebrook in the solomon islands for dec  the twenty-third  2029 
add to my mac  n cheese playlist with tsūzetsu
find the television show called tactics
when is his english wife showing at the neighborhood cinema group
add another tune to kristine s laundry playlist  
play a top-five song by pete candoli 
rate the current essay 1 of 6
play top-50 peter frampton songs
add tune by leonard cohen to road trip
what is the forecast for in eighteen minutes here for colder temps
i need a reservation for apr  the sixteenth  2027 in cazenovia  ca
put sita on bettie s global funk playlist
book a churrascaria restaurant for 2 which serves mezes 
find a highly rated brasserie restaurant in liberia and book a table for 5
will the weather be temperate 188 days from now in zimbabwe
play the theme music from 1963 by yuki koyanagi
play music from lastfm 
please play some music from 1996
find afternoon movie times for movies in the neighborhood
find the passion of michel foucault novel
i want to give the saga in praise of the stepmother 2 out of 6 points 
book a spot for six at a restaurant that serves fish and chips
include badmeaningood volume4 in jaime s animal stories playlist  
what films are playing at pacific theatres
i want to add club mix to the playlist with the title 50 clásicos
please make a reservation at ten at a bakery which serves burrito 
rate the current series a one
rate 12 great classics of science fiction zero out of 6 points
add the song to my we everywhere  playlist
book red crown tourist court now for ten not far from tin city
will it be colder here one minute from now
show the schedule of movie unborn but forgotten
i want to give this novel zero
what animated movies are playing at the closest movie house
find movie times 
i feel like this essay deserves four stars
is it going to be colder in louisiana
play pop
book me a restaurant for me  geneva and wilda for now in blacksville
find the living room tapes  a tv series
make me a reservation in colorado at nine am at national cash register building
play some gotye
play the heinz strobl ep from 2016 on groove shark
when is harassed being played at plitt theatres
how will be the weather in cotopaxi national park at breakfast time
rate the current book one of 6 points
what s the weather in organ pipe cactus national monument
get me a highly rated restaurant in nigeria
listen to vertexguy track
i give the next essay 4 out of 6 points 
i need a photograph of days of wine and roses and other tv requests
what films are playing at great escape theatres
what time are the animated movies playing at mann theatres
play used to love her by dara 
please add 80s classic hits asking for it to my playlist
i want to give this current novel 4 points
what s the forecast for maltio strict nature reserve
the mystery of the brass bound trunk deserves only a 1 star rating 
i need another artist in the new indie mix playlist  
rate the at the villa rose series 3 of 6
book something for darlene  tessa and maxine at a restaurant for 09:58:27
find harry potter and the deathly hallows – part 2
can you tell me the movie schedule for general cinema corporation
give 0 stars to this textbook
find the schedule for project shadowchaser ii at the cinema in eighteen hours 
pull up the tv show  40 seasons: the best of skid row
i want to play a game called scotland tonight 
book a spot at a soul food food truck in cawker city
add a tune to skylar diggins  training mix
book a taverna for a party of 10
will it be cloudy in one minute in jungo mh
find the movie schedule 
give love in the time of foreclosure 4 of 6
is it going to get hotter in my current position
i want the complete global albums collection
when are animated movies playing at goodrich quality theaters
rate nothing lasts forever a value of 3
tell me when howling ii: your sister is a werewolf is playing 
play the top 5 by akira the don 
add bilal to winter
book a table for one at a highly rated bistro
add artist to my working day
add hanging on to my just dance by aftercluv playlist 
find movie times at national amusements
i want glam added to the ntc gym strong playlist
can you help me find tears from a willow
add tune this is puccini to my playlist
show the singles collection volume 4
give 0 out of 6 points to the paper men
play some good amber gristak on lastfm
will there be hail in kaffir
tell me the weather forecast for croatia now
weather forcast for current location now
play fifties movement songs by fabio on last fm
use itunes to play dancing playlist
find a soundtrack called the spanish jade
book a spot for seven at a japanese joint in grandview heights
play frankie laine
rate break no bones series a 1 of 6
what time is truth about kerry playing at movie house
is it going to be nicer next week in hamel belize
open pandora and play music from the fifties  
i want to hear the top 5 jamie lidell songs
rate human capital supply chain four of 6 points
what is love in a mist
book for jessie  dale wright and lupe at a bistro on feb  20  2040
show the creativity of saga the dissociatives
book a caucasian serving steakhouse for 4 in saint pierre and miquelon
use service vimeo to play music from the artist mick track now we are 5
play the view from the afternoon by malese jow on last fm
rate this saga 4 out of 6 stars
need a creative work with the title unholy confessions
book for crepes at a restaurant in sint maarten
play the news virginian song
add this song to my playlist under funky jams
i give the following textbook 3 points 
add to anacreon in heaven into the playlist girls  night
what will the weather be in worthington springs
will it be colder in noblesville east timor at 3 pm
please book a restaurant for nine members on august 25 in dc
play the top ten by andrea del rosario 
book a spot at a crab restaurant
will it rain here
what will the weather be like four seconds from now in south dakota
rate a battle of nerves three stars out of 6
can you get me seating for 5 at a highly rated restaurant in wisconsin
i am giving the book after henry a rating of 0 out of 6 stars
search for polish assault
give 5 out of 6 to this book
play a song from 1994 
book a highly rated bar in curacao for one
rate pastwatch: the redemption of christopher columbus chronicle zero points
book me a reservation for ad hoc in brazil for a party of 7
movie schedule at speakeasy theaters
give enemies  a love story 4 points out of 6
add blag dahlia to pura vida
what is the song the beast from 20
please book a bar type goiano room accommodate for 2 members 1 second from now in pr
the points given are five for dust and shadow
find me a table at a european bar for six in the neighboring downtown area 
put this track on soul bpm my playlist
find a saga called shame on you
i need to book a restaurant for 6 people  
rate the current album 3 points
put artist hridaynath mangeshkar onto my night out playlist
show that little band of gold
please put this artist on my indie mim playlist
make me a reservation at a popular place that serves udupi at a restaurant
i give this textbook a four
what is the weather forecast here one minute from now
where is the creative work seven pillars of wisdom
play murder the mountains by mana on netflix
rate the sacred fire series 5 points
is the man who won playing at 6 p m 
what will the humidity be in beroun on aug  26
can you put the little grey mother who waits all alone into uncharted 4 nathan drake
find the burn the sky down album
what will the weather be like in louisiana will it be colder then now
will it be raining one hundred thirty days from now ion gobles canada
hot weather forecast for pilar  réunion 
book a restaurant for 2 that has internet
is there a freezing forecast for minto  nicaragua
find a reservation for six at a top-rated brasserie
add erik santos in my playlist metal xplorer
give me the showtime for bobby yeah playing at the cinema
add on with the show to my beast mode playlist
in google music play the top singles released in 1972
rate the current album a 2
book helianthushof in hurffville  nj
find me the movie schedules
open youtube and play renaldo lapuz record from the eighties
give me the weather forecast in boma for next summer
what s the weather here
find plitt theatres showing animated movies
when is robotix playing
rate this novel five points
find beavis and butt-head
will it be cold at 1 am in boon
let me know when the maiden danced to death will be screened at a cinema 
give this album a three
play 1970 trunes
will it be chilly at boggs mountain demonstration state forest
i d like to find the days of glory saga
play some stephen jones on youtube
give highways in hiding a 5 out of 6 points 
i want if i could be with you added to mellow dinner
rate getting it wrong from the beginning a value of 4
where can i buy a photograph called feel the love
add this artist to this is rosana
i d like to eat salads at a restaurant
play me the track mama liked the roses
find me the rise and fall of the great lakes saga 
find five points called the origins of virtue
put an album by mohammad reza shadjarian in my chillin  on a dirt road playlist 
please search cardin in australia saga
i need to book a restaurant for five in 1 minute that serves chichi in east prairie
give three out of 6 points to this textbook
rate this textbook a 4
what films are at imax corporation at 11 p m 
give 0 out of 6 stars to this album
show weather forecast for lewis center
can i put johnny burke onto my lo que suena los angeles playlist
ad i should have known better to this is bb king
add puzzles like you in my playlist reggae
rate doctor no one of 6
please play every woman in me
add name house of gold to the de manhattan con amor playlist
play igor nikolayev music from the fourties
play me a song by stephen jones
play some christian rock
i d like a table at the san francisco brewing company in puerto rico at noon
tell me if there will be a depression today in kiribati
play a top twenty symphony of 2010
add banana republic to my this is puccini playlist
i d like to see the current showtimes for his kind of woman
what s the weather forecast for my current spot
play show of cissy houston
book a spot for 3 at supper time in il
will dick tracy e il gas misterioso start twenty one hours from now
play the energic itunes
play some music on itunes
give life: a natural history of the first four billion years of life on earth 1 points out of 6
book a reservation for a gastropub serving liver and onions
please find the schedule for jappeloup at bow tie cinemas 
will it be hot in west union  malaysia
add this album by don reno to my playlist named indiespain
find the inspector for me
play a track by titiyo
play the top song by amon amarth on groove shark
show creativity of the force behind the power
play the best ballad by the rascals 
rate current book 0 stars
find the real dirt on farmer john  a saga
i need to find the creative work prince hours
what are the movie schedules
book in one hour within walking distance of a restaurant downtown
what theaters are showing a lonely place to die – todesfalle highlands starting at 14:40
will it be stormy in distant holly river state park
give this book four stars as a rating review 
play zvooq latest track by peter appleyard
add halfway between here and there to my canadian country playlist
what is the idledale forecast
play an alla pougatcheva ballad on pandora
will it be hotter in ct at 6 am
what s the forecast for lake ilo national wildlife refuge
rate this textbook 2 points 
can i see the album swat force
show me the nearest movies at movie theatre for twenty one o clock
what are the movie times for dickinson theatres
include stefanie in pre-party r&b jams
play me a song by kevin cadogan
is it going to be cold at 4 o clock far from here
find a movie theatre showing the tailor of panama
book a table for three at a restaurant in louisiana
at ten am i want to reserve a spot for 9 people to eat in monaco 
play the album by paul barker playing the greatest from 1978
set me up with a table at a bar with salade for 5
what is the weather forecast for winger
find a show called the crowd roars
play the music of filipp bedrossowitsch kirkorow s theme
play the top-5 sort of ballad music from 2012 
where can i find on the marble cliffs
find films in cinemark theatres
what time is mulawin: the movie showing at the nearest movie house
i think this essay is only good for one stars
find a photograph called accion newspaper
show me the movie schedules for movies playing nearby 
play miyavi s music from seventies on google music 
please book me a table for 6 people at top of the mark in raleigh hills  kentucky
make a reservation for 8 at a diner that serves haystack
find a tv show called full house
what will the weather be here at 07:08:00 am
showings for animated movies in the area 
play fifties music on deezer
fine movie times 
will it be warmer at lunch in prentice  armenia
i would like to book a donut serving delicatessen in cuba for 5 on april eleventh
i need a reservation for red square on aug  the 9th
i d like seats for one at a restaurant in 1 hour at a place in la madera that has parking
in morgan mill will it be sunny
where can i purchase the twenty chickens for a saddle saga
find me the young doctors in love tv show
show creativity in the red saga
play tenerife sea by daniel salomon on lastfm
find the schedule for the kentuckians 
play music from 1976 on deezer
play dj scratch s eighties music on iheart 
this track should go on my evening chill playlist
i want to see the novel  the green
give 2 stars to mulligan stew series
play music by damien rice
can you find the movie accidentally in love
please get me infernal devices game 
find an album called thursday night baseball 
find a tv series called all time greatest movie songs 
rate my current album 3 stars
wish to hear music from the year 1996
proceed with music from 2003 
check the weather forecast for biscay
what are the movie times for united paramount theatres
is it going to be foggy at two am in barberville
need the saga called the black lamp
is it going to be chillier in new mexico this spring
book a table somewhere in dominica for 2 minutes from now
when will wi be temperate
for the curious incident of the dog in the nightdress i rate it 2 of 6 points
i need a reservation for arcadian court on june the fifth  2035
i need a forecast for zachary
what is the currituck national wildlife refuge forecast for chilly conditions
find a soundtrack called the outpost 
find movie times for alamo drafthouse cinema at 10:37 p m  
play harel skaat
rate the longest day with zero stars out of 6 
show chillier conditions next week in camp bird
what time are movies showing around here
give this textbook a five
i am rating this book titled a history of warfare under the war series 1 out of 6 stars
i want to add kiara to my digster future hits playlist
add 9am in dallas to my classical music for smart kids
find a television show called happy trails
add this artist to piano chill
i need a party of 4 to get a table reserved at a pub with southeastern cuisine 
find a reservation for a highly rated steakhouse in china for a party of five at 05:51:52
can you get me a reservation at wwe the world around av u
find movie times
find the schedule for chronicle of my mother at the nearest cinema in 1 minute and 8 seconds 
search for the hills have eyes: the beginning tv show
show me the movie schedule
play robert stoddard from 1988
mark the current textbook a 1 from the total of 6
i want to hear the new movement from richard harvey
play the most popular sort by ep by brooke fraser
book at dutchess manor in portugal for 6
play dj drama from the 1976
how s the forecast for chad on september 28  2034
can i have the forecast for bear rocks lake wildlife management area
i wish to listen to some instrumental music 
show the schedule of movie the statue
add monster monster to my throwback thursday playlist
add a gate through bloodstained mirrors to feelin  good playlist
make a reservation at a tavern which serves clam cake for a party of 8 in western sahara 
book a table on 6/14/2035 at a bakery within walking distance of equatorial guinea that serves paella
i want to book a restaurant for a year from now in maine 
show me movie times
find the album smoke and mirrors
book me a reservation at a highly rated tavern in hornersville
please put an album by joseph meyer on my pop goes the 80s playlist
what s the weather in paris
find the movie times now 
give the current chronicle a three 
book a restaurant this year in manning
book the coon chicken inn in baker city for 4 people 
i would rate this essay four stars
add tatico henriquez in my playlist called bleeps & bloops
i want to book a reservation within the same area of amelia court house for 4 
find the schedule for the voice in the fog at night at the closest movie house 
play good music by general woo on deezer
what s the weather forecast for neighboring delft national park on aug  the 8th  2028
find the movie schedule for 12:53 am
can i hear a tune from vladimir vysotski
when is the bleeding house playing at amco entertainment
play some joeri basjmet 
find tv series of noroi - the curse
this track should get added to spain top 50
give a mile beyond the moon five points
i would like to book thomas hynes house for 6 in minnesota
book a restaurant for marcella  erma and leanne rivera 
where can i purchase the tv series liar game - the final stage
play my trapeo playlist 
what s the weather forecast for tomorrow around sankertown
play me the show house of stairs
find me the photograph the late music
play music form the fourties with slacker
add sam moore to lo mejor de los 00 s
play some space music on google music
i need a reservation for a party of ten in algeria 
what is the fiji forecast for warm temps
book a meal for four in dc
play a ballad by giorgio moroder
is it going to hail in niger
add this tune to morning commute
find me the movie times
i need movie times at fox theatres around zero pm
play some sam moore 
what is the forecast for bad branch falls state nature preserve for in 1 hour and 14 seconds
make this essay two out 6 stars
play music off netflix 
what times will animated movies be showing nearby
i want to hear aki nawaz  play the song fair annie 
do an image search for the picture perfect storm: disasters that changed the world
when is ode to billy joe playing at the closest movie house
will it rain in barberville
what is the weather forecast for manassa
add la jaula de oro to my evening commute playlist
add this david cole track to my totally stress free
find the movie schedules for cobb theatres 
show creative game elements of life: remixed
my brother in law and i would like to go to guinea-bissau for food
i gave the current chronicle a 3 of 6
want a work called walk the river
book the best halal restaurant in slovakia for brigitte taylor  katelyn and natalie on jun  2 
put another tune into my dancehall official playlist  
book a restaurant this year in pagosa junction for a romanian stle cusine for a party of two
add tune to my playlist eletro br
what s the weather forecast ten years from now in mount victory  macao
what is the forecast here for september 16
find seven am movies at dipson theatres
give this book titled othappu zero points
rate the current album 4 of 6 stars
find the tv show hot air
i am giving this current novel 4 out of 6 stars
add entre um coco e um adeus to taylor s this is john williams playlist
what films are showing in the neighbourhood 
what is the forecast for cold temps in west virginia next autumn
give the current essay 5 out of 6 points 
find a nearby movie schedule for movies
what cinema is the railway children
provide me the movie schedules
find back for good  a novel i want to read
book a popular brasserie in roads end
play me a bluegrass song
when is the next showing of star wars: the clone wars
what is the weather looking like in prosser on feb  the 18th
what is the weather looking like for december the eleventh  2034 in md
look for the saga called death in paradise
book a reservation for five people at a restaurant with pool in benkelman  mi in apr 
add this song to cleaning
check the weather forecast for the current position 
play furusato on google music 
book a table for seven people at a restaurant which has internet 
find chant down babylon: the island anthology
play music from paul landers
can you give me the forecast for osgood
what will the weather be in bernie id
which cinema is playing das ende – assault on precinct 13
find the flying ace
book a restaurant for nine in south sudan 
give mistborn: the well of ascension four out of 6
add happy holidays to my playlist called it s ok to like jazz
what films are at the closest movie theatre 
find movies in the neighbourhood with movie times
rate this novel 5 out of 6 stars
find the watcher at united paramount theatres
the previous textbook is a 3
where is boo to you too winnie the pooh playing
give the englishman of the bones 2 stars out of 6 
add xsuie in your favorite coffeehouse
please provide the rainbow mars series a zero out of 6 points 
play a chant from 1978 
what s the weather in south hill
what is the loco weather forecast
i would rate coming through slaughter a four out of 6 
pull up mafia: the city of lost heaven
add norma jean to my pure rock & roll playlist 
i am giving this current textbook zero out of 6 stars
what is the weather starting at 11:47:52 for south africa
find the closest cinema playing little red monkey 
rate the desert column 3 out of 6 
find a trailer called just say noël 
play some nineties chant music from nicoleta nicola
add see me now to my enamorándose playlist
find the nearest movie house with pirates of the 20th century
play a paul davis melody
i d like to eat at an outdoor restaurant
what is the temperate in beltsville
what movies are playing at the nearest cinema
play the top-twenty margaret becker songs with google music
rate this novel a 4
show me happiness was free 
book a restaurant for me  valarie and caroline in 56 weeks  in soldier pond
will it be cold in carnot or
i would give this chronicle 0 stars
i d like to watch movies at the nearest movie house
is the suicide shop playing at southern theatres
what is the forecast for here and now
i give this essay 0 of 6 stars
find me the movie with the title of twitches
play me track september  gouden roos by artist daedelus
what are the movie schedules for the caribbean cinemas
please play some music for me on netflix
will there be a storm six weeks from now in albania
will it get windy this week-end in selva jedediah smith
i need a schedule for the cinema that is showing the shiralee
i need a reservation for a party of three  maybe a gastropub that sells steak 
add atticus ross to the playlist electrosafari
will you show me a schedule for movies around here
book an outdoor restaurant 
is it going to be chillier in saint augustine  wy on may 3rd
what is the weather in deeth
book a restaurant for me and my mother in law in montserrat
how can i see the tv series mothstorm
what is it like on 7/10/2023 in the current place
sort eighties ep from the last
include dschiwan gasparjan in beth s rare groove playlist  
show me the trailer a self made hero
book spot at a balinese joint
find animated movies at the nearest movie theatre
find me the show girl soundtrack
add beijing huanying ni to my workday lounge playlist
book a restaurant reservation for my gf and i within walking distance of sondra s university
weather for notasulga at elevenses
can you get me a table at a chicken and waffles joint in new mexico
add hopeful to my this is enrique iglesias
let s listen to the most popular marty friedman songs on zvooq 
add sweet black angel to my diarios de bicicleta playlist
find animated movies at the nearest movie theatre
rate this book 3 of 6 points
play listen to the mocking bird by billy martin on youtube
please book a restaurant for nine members 
add a track by bt to my independent music monday playlist 
plau me the song the french chef
at thirteen hundred hours what will the weather be on ghana
play ep from quasimoto from the nineties
play music from youtube 
play music on deezer by imogen heap
will it get colder in alaska
can you find me the work titled  a little curious
book a table at a brasserie far from my livonia av 
i want to book a restaurant in barbados that serves creole 
what is the weather like right now in the same area as georgia
add track to rapcaviar
what is the expected weather forecast for beckley
what s on the movie schedules at amco entertainment
add lari white song to my soulful disco playlist
i have four people needing a restaurant reservation 
play calico skies by john feinstein with netflix
add hello i must be going to the power ballads playlist
can you tell me the weather conditions for patricia
add an album by jenifer to my travelling playlist
is jack the ripper playing in one hour at the nearest movie house
find a trailer for pesterminator: the western exterminator
i need a table for a party of 2 at co-operative block building in old glory
play music on the playlist urban hits
play melody music from the thirties
i want this album on my indie alternativa playlist
what s the movie schedules for magic johnson theatres
play a fairouz tune on deezer
book a table for sep  the second  2020 at a highly rated place for me and my baby at a joint serving cambodian
add an artist to my playlist this is verdi
give the following essay one stars
what s the weather forecast for 8 hours from now in cape verde
is it supposed to be windy in me on june the 14th  2024
rate anarchy  state  and utopia saga a 5
find the song tholireyi gadichindi
what is the forecast for 15:04 in georgia for overcast conditions in valley view
insert rock me up song to my list
rate this series one out of 6 
play the track goodbye alexander  goodbye honey boy from ehsaan noorani
the current album gets three out of 6 points
where can i find lonely hearts
add falcon to the top tracks in metal playlist  
rate how to eat fried worms two stars
play paul riley on youtube
give drift: the unmooring of american military power 0 out of 6 points 
add mike mantler to playlist girls  night
add be yourself tonight to i love my 90s hip hop
show me the album til the morning
show me the picture the afternoon
where can i see the show twentysomething
add the name the 3rd world to the playlist rock me up
how much humidity is there in ut
can you tell me what time the fickle is playing at the closest cinema
where can i buy a barometer clock
rate the following series a one out of 6
list movie schedule 
rate the current saga zero of 6 stars
book a table at carter house inn in saint bonaventure  alaska 
play té para tres
is it currently cold in elsmore  luxembourg
add this song by george melly to my 90 s baby makers playlist
play some 1962 theme music 
put this track on operación bikini
is it supposed to snow in nv
to the stars: the autobiography of george takei gets four out of 6 stars
play luis alfonzo larrain from 1995
what cinema is health warning playing in eleven hours
show the forecast for two years from now in lake telemark sudan
book a restaurant for six in mp
what movies are at malco theatres
what time can i see the conflicts of life
what s the weather forecast for haigler
is it chillier in mint hill fm
will there be hail around khao phanom bencha national park
book a restaurant in ca for my parents and i on oct  the seventeenth
show me the movie schedule 
give one out o 6 stars to this chronicle
can i get the movie schedule for the bow tie cinemas 
is it hot here
can i get the showtimes for films at dickinson theatres
play alfredo zitarrosa on spotify 
add the name kids in the street to the plylist new indie mix
i want to put this artist in mellowed out gaming
i would give the lady of the rivers 0 stars
is judgment day: the john list story playing at megaplex theatres
will it be chilly at 4 in druid hills american samoa
find me the river of love saga
play a concerto that was most popular in 1958 by mickey hart
show me the show live at the fillmore east
play the busco un pueblo album
book a table at a diner which serves thousand island dressing in ivory coast 
book a restaurant in san juan capistrano for 6 people at ten am
play piano 100
find wish you were here  a movie
add tune to my the southern highway chronicles playlist
find a cinema closest with animated movies
add kirk hammett to calm down
find a movie schedule
give zero out of 6 points to the false peace
rate my current novel 3 out of 6
play the top-twenty songs by the kleptones on spotify
find me the tv show ask a woman who knows
play the top hits of 2016
is tomorrow at seven being played at douglas theatre company
book a reservation for a taverna at sunrise in kaanapali
rate the race a two
find phinally phamous
play march of the soviet tankmen from gloria gaither
book a table for me  naomi and elisabeth at a brasserie with wifi
give two out of 6 stars saga called the big question
i need to book a highly rated restaurant in coronado
please find me a novel called the caledonian-record 
find journal of the european economic association  a movie i want to see
play a top twenty symphony by bumble bee slim
i give the caxtons chronicle 1 out of 6 stars 
add this tune by nokio the n tity to my this is bb king playlist
show movie schedules
show me the tv show have a nice day
play the graduate faculty philosophy journal album
book a reservation for seven people at a bar in kentucky
play me the trailer for chasing after shadows    living with the ghosts 
therese  clara and i want to go to the tennessee ridge
i want to rate the medici seal two out of 6 points
show me movie times at my local theater 
give 4 stars to the current essay
book a reservation for me and my wife at the middle east in guernsey
play me a twenties song
how temperate is it in lopeno  thailand
what s the weather in andorra
show me the films close by and the movie times for today 
play music from the twenties
is a short film about killing at north american cinemas
can you help me search the album titled playmaker football
what time is exploits of a young don juan playing
rate this textbook 4 out of 6 stars
play the top fifty record from alan jardine
can you put a song by rick astley on my hot 50 playlist 
book a masala bar on march 6  2034
will it be warmer 1 minute from now at farmington canal state park trail
where is the nearest cinema playing rainbow eyes that starts in one minute
find half a truth
book a spot in town in the same area as me
check the movie timings for cracked nuts at southern theatres 
forecast for antelope island and other spots within the same area
add tony mcguinness to my playlist i love my 90s hip hop
add tune to blues
find me the nearest movie theatre that s showing the spell of the yukon
what is the weather forecast for maryland
add sheila to enamorándose
the zen focus playlist needs david franj in it  
i m looking for the show called the origin of the milky way
find an album called stumble stop repeat
play a top song by carson parks on groove shark
show weather forecast in east tawakoni italy at four pm
what is the weather forecast for nassau bay  uzbekistan
i want a table for eight at gu
rate the current novel five of 6
add this marilyn manson tune to latin party anthems
find the album future of the past
rate the doomsters four out of 6 stars
show creativity of night of the hunter
what is the weather here at 7 am
play annet artani soundtrack on slacker
find valley of the dolls
i want to hear the fear the boom and bust song from haruka shimotsuki off of spotify
rate the last series one of 6 stars
find me the martin morning saga
i need to book a table for three at a restaurant in south sudan 
play me a nineties song by joseph genaro
go to the movie welcome to tokyo
play a song by juanes on last fm
i would rate the spoiler 0 stars
listen to acapella
add kurious jorge to my synth pop
show me movie times for southern theatres
dawn of the emperors: thyatis and alphatia deserves a rating value of 1
add great grape to my playlist named novedades pop
i d like to watch the trailer for dungeons & dragons: chronicles of mystara 
rate this saga 0 stars
what is the forecast for lesotho for starting this fall
play anything from the top-50 jeff irwin record off of itunes
find movie schedules with animated movies close by
i give the budayeen nights saga five out of 6 points 
play the 2014 album from la lupe
show me the landing at low tide painting
i give the previous album one out of 6 points 
find the movie times for films in the area 
what will it be like feb  the twentieth in colorado
what is the local movie schedule
3 out of 6 for the last album
find movie schedules
rate the documents in the case series two of 6
i want to book a table for two at a close by bar in kuwait 
rate incomplete nature three of 6 stars
what s the weather forecast for spain
add a song by szahram nazeri to my playlist called this is jennifer lopez 
will it get chillier in furano-ashibetsu prefectural natural park
play dave joyal
what is the blizzard forecast for 12:06 in ms
add this artist to my sinfonía hipster
play me some grunge music
give me the weather forecast in zimbabwe 
weather for james m  robb – colorado river state park
show creative work or miami vice theme
play me some badass women on groove shark
book the best close-by bar in union city 
i m looking for the hit album  the politics of dancing 
add a song by masayoshi yamazaki to my this is los fabulosos cadillacs playlist
what is the forecast for petersville  oh
let me know what animated movies are playing around here 
book a spot at the top-rated pub in garner
find me the memorial
list movie times playing animated movies nearby
i have a party of 7 in east timor
book a reservation for 5 people next week at the pump room  chicago
book a spot for vicki and i at a restaurant in puerto rico
add metal church to my playlist named stress relief
will it be freezing in the city of sardis
i m looking to bring shawn  marguerite and della to a place to eat at near rwanda 
show movie times
book a restaurant for 7 in mn
in the neighborhood find movie times for movies
rate the watsons four of 6 stars
i would give this current novel two points or a rating of 6
what is the thursday forecast for akers new hampshire
can you play the change is made on netflix
find cut the rope
i want to give this current saga 6 points and a rating value of 1
play some music from 1989 by sanjeev abhyankar 
rate this novel four of 6
is you will meet a tall dark stranger at bow tie cinemas
what is the amc theaters movie schedule
rate current textbook 5 out of 6
show the nearest movie house with the expendables starting 1 minute from now
find the painting sleeping in your hand
i d like to see level headed 
what time is cold prey 3 playing at cinema
can you give me a forecast for weather at night in my current position
give the fox and the hound a 1
i d like to watch miss congeniality
what are the movie schedules for movies playing in the neighborhood 
i want toi hear some pop punk perfection ������ off of deezer
find the branded woman
book a restaurant in town not far from here for me and my mother in law 
show me the photograph of minutes to midnight
will there be a blizzard in ar
play the cabin fever 2: spring fever saga
find a video game called batman: the return of bruce wayne 
i want this song on the playlist called chill vibes
what is the weather forecast in 13 seconds  in grand traverse bay bottomland preserve
play some chant music from 2008 
give this current textbook zero out of 6 points 
put another artist in my opera 100 spotify picks playlist  
when will it be chillier than now in south paris in ct
find some close by movies
add keke wyatt to my evening commute playlist
how do i see the tv series to see the invisible man
play a track from 2004
book a table for 10 people at harry’s bar  benin 
find the trailer for real men cry
show me the current movie times
i m looking for a job in inversion
what s the weather two months from now in arletta malawi
[truncated: 216,747 more chars]
