# Supplementary material
Source: ML conference proceedings conference paper supplement (https://aclanthology.org/P19-1544)
Supplement: Supplementary [file P19-1544.Supplementary.zip › SF-ID-network/data/snips/valid/label]

AddToPlaylist
AddToPlaylist
AddToPlaylist
AddToPlaylist
AddToPlaylist
AddToPlaylist
AddToPlaylist
AddToPlaylist
AddToPlaylist
AddToPlaylist
AddToPlaylist
AddToPlaylist
AddToPlaylist
AddToPlaylist
AddToPlaylist
AddToPlaylist
AddToPlaylist
AddToPlaylist
AddToPlaylist
AddToPlaylist
AddToPlaylist
AddToPlaylist
AddToPlaylist
AddToPlaylist
AddToPlaylist
AddToPlaylist
AddToPlaylist
AddToPlaylist
AddToPlaylist
AddToPlaylist
AddToPlaylist
AddToPlaylist
AddToPlaylist
AddToPlaylist
AddToPlaylist
AddToPlaylist
AddToPlaylist
AddToPlaylist
AddToPlaylist
AddToPlaylist
AddToPlaylist
AddToPlaylist
AddToPlaylist
AddToPlaylist
AddToPlaylist
AddToPlaylist
AddToPlaylist
AddToPlaylist
AddToPlaylist
AddToPlaylist
AddToPlaylist
AddToPlaylist
AddToPlaylist
AddToPlaylist
AddToPlaylist
AddToPlaylist
AddToPlaylist
AddToPlaylist
AddToPlaylist
AddToPlaylist
AddToPlaylist
AddToPlaylist
AddToPlaylist
AddToPlaylist
AddToPlaylist
AddToPlaylist
AddToPlaylist
AddToPlaylist
AddToPlaylist
AddToPlaylist
AddToPlaylist
AddToPlaylist
AddToPlaylist
AddToPlaylist
AddToPlaylist
AddToPlaylist
AddToPlaylist
AddToPlaylist
AddToPlaylist
AddToPlaylist
AddToPlaylist
AddToPlaylist
AddToPlaylist
AddToPlaylist
AddToPlaylist
AddToPlaylist
AddToPlaylist
AddToPlaylist
AddToPlaylist
AddToPlaylist
AddToPlaylist
AddToPlaylist
AddToPlaylist
AddToPlaylist
AddToPlaylist
AddToPlaylist
AddToPlaylist
AddToPlaylist
AddToPlaylist
AddToPlaylist
BookRestaurant
BookRestaurant
BookRestaurant
BookRestaurant
BookRestaurant
BookRestaurant
BookRestaurant
BookRestaurant
BookRestaurant
BookRestaurant
BookRestaurant
BookRestaurant
BookRestaurant
BookRestaurant
BookRestaurant
BookRestaurant
BookRestaurant
BookRestaurant
BookRestaurant
BookRestaurant
BookRestaurant
BookRestaurant
BookRestaurant
BookRestaurant
BookRestaurant
BookRestaurant
BookRestaurant
BookRestaurant
BookRestaurant
BookRestaurant
BookRestaurant
BookRestaurant
BookRestaurant
BookRestaurant
BookRestaurant
BookRestaurant
BookRestaurant
BookRestaurant
BookRestaurant
BookRestaurant
BookRestaurant
BookRestaurant
BookRestaurant
BookRestaurant
BookRestaurant
BookRestaurant
BookRestaurant
BookRestaurant
BookRestaurant
BookRestaurant
BookRestaurant
BookRestaurant
BookRestaurant
BookRestaurant
BookRestaurant
BookRestaurant
BookRestaurant
BookRestaurant
BookRestaurant
BookRestaurant
BookRestaurant
BookRestaurant
BookRestaurant
BookRestaurant
BookRestaurant
BookRestaurant
BookRestaurant
BookRestaurant
BookRestaurant
BookRestaurant
BookRestaurant
BookRestaurant
BookRestaurant
BookRestaurant
BookRestaurant
BookRestaurant
BookRestaurant
BookRestaurant
BookRestaurant
BookRestaurant
BookRestaurant
BookRestaurant
BookRestaurant
BookRestaurant
BookRestaurant
BookRestaurant
BookRestaurant
BookRestaurant
BookRestaurant
BookRestaurant
BookRestaurant
BookRestaurant
BookRestaurant
BookRestaurant
BookRestaurant
BookRestaurant
BookRestaurant
BookRestaurant
BookRestaurant
BookRestaurant
GetWeather
GetWeather
GetWeather
GetWeather
GetWeather
GetWeather
GetWeather
GetWeather
GetWeather
GetWeather
GetWeather
GetWeather
GetWeather
GetWeather
GetWeather
GetWeather
GetWeather
GetWeather
GetWeather
GetWeather
GetWeather
GetWeather
GetWeather
GetWeather
GetWeather
GetWeather
GetWeather
GetWeather
GetWeather
GetWeather
GetWeather
GetWeather
GetWeather
GetWeather
GetWeather
GetWeather
GetWeather
GetWeather
GetWeather
GetWeather
GetWeather
GetWeather
GetWeather
GetWeather
GetWeather
GetWeather
GetWeather
GetWeather
GetWeather
GetWeather
GetWeather
GetWeather
GetWeather
GetWeather
GetWeather
GetWeather
GetWeather
GetWeather
GetWeather
GetWeather
GetWeather
GetWeather
GetWeather
GetWeather
GetWeather
GetWeather
GetWeather
GetWeather
GetWeather
GetWeather
GetWeather
GetWeather
GetWeather
GetWeather
GetWeather
GetWeather
GetWeather
GetWeather
GetWeather
GetWeather
GetWeather
GetWeather
GetWeather
GetWeather
GetWeather
GetWeather
GetWeather
GetWeather
GetWeather
GetWeather
GetWeather
GetWeather
GetWeather
GetWeather
GetWeather
GetWeather
GetWeather
GetWeather
GetWeather
GetWeather
PlayMusic
PlayMusic
PlayMusic
PlayMusic
PlayMusic
PlayMusic
PlayMusic
PlayMusic
PlayMusic
PlayMusic
PlayMusic
PlayMusic
PlayMusic
PlayMusic
PlayMusic
PlayMusic
PlayMusic
PlayMusic
PlayMusic
PlayMusic
PlayMusic
PlayMusic
PlayMusic
PlayMusic
PlayMusic
PlayMusic
PlayMusic
PlayMusic
PlayMusic
PlayMusic
PlayMusic
PlayMusic
PlayMusic
PlayMusic
PlayMusic
PlayMusic
PlayMusic
PlayMusic
PlayMusic
PlayMusic
PlayMusic
PlayMusic
PlayMusic
PlayMusic
PlayMusic
PlayMusic
PlayMusic
PlayMusic
PlayMusic
PlayMusic
PlayMusic
PlayMusic
PlayMusic
PlayMusic
PlayMusic
PlayMusic
PlayMusic
PlayMusic
PlayMusic
PlayMusic
PlayMusic
PlayMusic
PlayMusic
PlayMusic
PlayMusic
PlayMusic
PlayMusic
PlayMusic
PlayMusic
PlayMusic
PlayMusic
PlayMusic
PlayMusic
PlayMusic
PlayMusic
PlayMusic
PlayMusic
PlayMusic
PlayMusic
PlayMusic
PlayMusic
PlayMusic
PlayMusic
PlayMusic
PlayMusic
PlayMusic
PlayMusic
PlayMusic
PlayMusic
PlayMusic
PlayMusic
PlayMusic
PlayMusic
PlayMusic
PlayMusic
PlayMusic
PlayMusic
PlayMusic
PlayMusic
PlayMusic
RateBook
RateBook
RateBook
RateBook
RateBook
RateBook
RateBook
RateBook
RateBook
RateBook
RateBook
RateBook
RateBook
RateBook
RateBook
RateBook
RateBook
RateBook
RateBook
RateBook
RateBook
RateBook
RateBook
RateBook
RateBook
RateBook
RateBook
RateBook
RateBook
RateBook
RateBook
RateBook
RateBook
RateBook
RateBook
RateBook
RateBook
RateBook
RateBook
RateBook
RateBook
RateBook
RateBook
RateBook
RateBook
RateBook
RateBook
RateBook
RateBook
RateBook
RateBook
RateBook
RateBook
RateBook
RateBook
RateBook
RateBook
RateBook
RateBook
RateBook
RateBook
RateBook
RateBook
RateBook
RateBook
RateBook
RateBook
RateBook
RateBook
RateBook
RateBook
RateBook
RateBook
RateBook
RateBook
RateBook
RateBook
RateBook
RateBook
RateBook
RateBook
RateBook
RateBook
RateBook
RateBook
RateBook
RateBook
RateBook
RateBook
RateBook
RateBook
RateBook
RateBook
RateBook
RateBook
RateBook
RateBook
RateBook
RateBook
RateBook
SearchCreativeWork
SearchCreativeWork
SearchCreativeWork
SearchCreativeWork
SearchCreativeWork
SearchCreativeWork
SearchCreativeWork
SearchCreativeWork
SearchCreativeWork
SearchCreativeWork
SearchCreativeWork
SearchCreativeWork
SearchCreativeWork
SearchCreativeWork
SearchCreativeWork
SearchCreativeWork
SearchCreativeWork
SearchCreativeWork
SearchCreativeWork
SearchCreativeWork
SearchCreativeWork
SearchCreativeWork
SearchCreativeWork
SearchCreativeWork
SearchCreativeWork
SearchCreativeWork
SearchCreativeWork
SearchCreativeWork
SearchCreativeWork
SearchCreativeWork
SearchCreativeWork
SearchCreativeWork
SearchCreativeWork
SearchCreativeWork
SearchCreativeWork
SearchCreativeWork
SearchCreativeWork
SearchCreativeWork
SearchCreativeWork
SearchCreativeWork
SearchCreativeWork
SearchCreativeWork
SearchCreativeWork
SearchCreativeWork
SearchCreativeWork
SearchCreativeWork
SearchCreativeWork
SearchCreativeWork
SearchCreativeWork
SearchCreativeWork
SearchCreativeWork
SearchCreativeWork
SearchCreativeWork
SearchCreativeWork
SearchCreativeWork
SearchCreativeWork
SearchCreativeWork
SearchCreativeWork
SearchCreativeWork
SearchCreativeWork
SearchCreativeWork
SearchCreativeWork
SearchCreativeWork
SearchCreativeWork
SearchCreativeWork
SearchCreativeWork
SearchCreativeWork
SearchCreativeWork
SearchCreativeWork
SearchCreativeWork
SearchCreativeWork
SearchCreativeWork
SearchCreativeWork
SearchCreativeWork
SearchCreativeWork
SearchCreativeWork
SearchCreativeWork
SearchCreativeWork
SearchCreativeWork
SearchCreativeWork
SearchCreativeWork
SearchCreativeWork
SearchCreativeWork
SearchCreativeWork
SearchCreativeWork
SearchCreativeWork
SearchCreativeWork
SearchCreativeWork
SearchCreativeWork
SearchCreativeWork
SearchCreativeWork
SearchCreativeWork
SearchCreativeWork
SearchCreativeWork
SearchCreativeWork
SearchCreativeWork
SearchCreativeWork
SearchCreativeWork
SearchCreativeWork
SearchCreativeWork
SearchScreeningEvent
SearchScreeningEvent
SearchScreeningEvent
SearchScreeningEvent
SearchScreeningEvent
SearchScreeningEvent
SearchScreeningEvent
SearchScreeningEvent
SearchScreeningEvent
SearchScreeningEvent
SearchScreeningEvent
SearchScreeningEvent
SearchScreeningEvent
SearchScreeningEvent
SearchScreeningEvent
SearchScreeningEvent
SearchScreeningEvent
SearchScreeningEvent
SearchScreeningEvent
SearchScreeningEvent
SearchScreeningEvent
SearchScreeningEvent
SearchScreeningEvent
SearchScreeningEvent
SearchScreeningEvent
SearchScreeningEvent
SearchScreeningEvent
SearchScreeningEvent
SearchScreeningEvent
SearchScreeningEvent
SearchScreeningEvent
SearchScreeningEvent
SearchScreeningEvent
SearchScreeningEvent
SearchScreeningEvent
SearchScreeningEvent
SearchScreeningEvent
SearchScreeningEvent
SearchScreeningEvent
SearchScreeningEvent
SearchScreeningEvent
SearchScreeningEvent
SearchScreeningEvent
SearchScreeningEvent
SearchScreeningEvent
SearchScreeningEvent
SearchScreeningEvent
SearchScreeningEvent
SearchScreeningEvent
SearchScreeningEvent
SearchScreeningEvent
SearchScreeningEvent
SearchScreeningEvent
SearchScreeningEvent
SearchScreeningEvent
SearchScreeningEvent
SearchScreeningEvent
SearchScreeningEvent
SearchScreeningEvent
SearchScreeningEvent
SearchScreeningEvent
SearchScreeningEvent
SearchScreeningEvent
SearchScreeningEvent
SearchScreeningEvent
SearchScreeningEvent
SearchScreeningEvent
SearchScreeningEvent
SearchScreeningEvent
SearchScreeningEvent
SearchScreeningEvent
SearchScreeningEvent
SearchScreeningEvent
SearchScreeningEvent
SearchScreeningEvent
SearchScreeningEvent
SearchScreeningEvent
SearchScreeningEvent
SearchScreeningEvent
SearchScreeningEvent
SearchScreeningEvent
SearchScreeningEvent
SearchScreeningEvent
SearchScreeningEvent
SearchScreeningEvent
SearchScreeningEvent
SearchScreeningEvent
SearchScreeningEvent
SearchScreeningEvent
SearchScreeningEvent
SearchScreeningEvent
SearchScreeningEvent
SearchScreeningEvent
SearchScreeningEvent
SearchScreeningEvent
SearchScreeningEvent
SearchScreeningEvent
SearchScreeningEvent
SearchScreeningEvent
SearchScreeningEvent
