# Supplementary material
Source: ML conference proceedings conference paper supplement (https://aclanthology.org/P19-1544)
Supplement: Supplementary [file P19-1544.Supplementary.zip › SF-ID-network/data/snips/valid/seq.in]

i d like to have this track onto my classical relaxations playlist 
add the album to my flow español playlist 
add digging now to my young at heart playlist
add this song by too poetic to my piano ballads playlist
add this album to old school death metal
i need to add baro ferret to the urban hits under my name
add the album to the might and myth power metal playlist 
to the travelling playlist  please add this david gahan song 
please add some pete townshend to my playlist fiesta hits con lali
i d like for kasey chambers s tune to be an addition to my chips and salsa playlist 
add recalled to life to this is alejandro fernández
add nuba to my metal party playlist
add jo stafford music to the workout twerkout playlist
put jean philippe goncalves onto my running to rock 170 to 190 bpm 
add the song virales de siempre by the cary brothers to my gym playlist 
onto jerry s classical moments in movies  please add the album 
add beyond the valley of 1984 in playlist folk music at the gaslight café
add jerry calliste  jr to my te quiero playlist 
add porter wagoner to the the sleep machine waterscapes playlist 
add the artist mike to the sexy as folk playlist 
add brazilian flag anthem to top 100 alternative tracks on spotify
add andy hunter to my evening commute playlist 
put petar georgiev kalica onto the old school hip hop playlist 
can you add larry heard to my laundry playlist
put vandemataram srinivas s track onto hiphop hot 50 
add millie corretjer to the rhythm playlist
add give us rest to my 70s smash hits playlist 
add this track to my hands up playlist
i d like for you to add bobby brown to my enamorándose playlist 
add jonathan sprout album to my this is miranda lambert playlist
add ireland in the junior eurovision song contest 2015 to my jazzy dinner playlist
add the album to the the sweet suite playlist 
add sarah slean to my playlist mellowed out gaming
add this album to the spanish beat playlist
add lofty fake anagram to the la mejor música de bso playlist 
add the track to the work playlist 
add a song to this is racionais mc s
add track in my playlist called hands up
can you put this song from yutaka ozaki onto my this is miles davis playlist
add a track to playlist cena con amigos
add the famous flower of serving-men to my evening acoustic playlist 
add a song to indie hipster
add the 40 cal tune to the laundry playlist 
add the album to my perfect concentration playlist 
add the matt murphy tune to the flow español playlist 
add a very cellular song to masters of metal playlist
can i put this tune onto my sin estrés playlist
i d like to add jordan rudess onto the divertido para niños playlist 
add kent james to the disney soundtrack 
add the artist adam deibert to my perfect concentration playlist 
can you put the artist giovanni giacomo gastoldi onto the chill out music playlist
add the album to the hot 50 playlist 
add the artist pete murray to my relaxing playlist
add the track to the drum & breaks playlist 
for my fantastic workout can you add sara bareilles
add the boy george track to the emo forever playlist 
add ted heath to the road trip playlist 
can you add last of the ghetto astronauts to the playlist called black sabbath the dio years
add this artist to showstopper being mary jane
put the artist onto top latin alternative 
add michael wittig music to country icon playlist
add highway patrolman in my playlist this is al green
add richard mcnamara newest song to the just smile playlist
add annesley malewana album to playlist indietronic
add the artist to my dishwashing playlist 
add this artist to fairy tales playlist
add muzika za decu to my crash course playlist
add a derek watkins tune to this is johnny cash
add our little corner of the world music from gilmore girls to my the funny thing about football is playlist 
add the current track to my this is tchaikovsky playlist
put abe laboriel onto the escapada playlist 
add abacab to beryl s party on fridays playlist
please add this track by paul mcguigan to the deep house playlist 
can you add the current tune to my calm before the storm playlist
please add the image of you to my playlist crate diggers anonymous
add a track to jazzy dinner
add the album to the hipster soul playlist 
add this tune to my sleepify playlist
add jack white to my playlist this is shakira
add tommy johnson to the metalsucks playlist
add the chris clark tune to my women of the blues playlist 
add an artist to jukebox boogie rhythm & blues
add this artist to my electronic bliss playlist
i need to add to my infinite indie folk list the works of rahim shah
add martin barre to my punk unplugged playlist 
add tierney sutton to my novedades viernes sudamérica playlist
add this tune to dorthy s 80 s party playlist
a very cellular song needs to be added to my masters of metal playlist
add toyan to my epic gaming playlist 
add the song to the mac  n cheese playlist 
add this artist to my spotlight on country 2016 playlist
add a song to my playlist madden nfl 16
add emilie autumn to my nação reggae playlist 
add farhad darya songs in virales de siempre
add a song in my all out 60s
add we have a theme song to my house afterwork playlist
add the song to my we everywhere playlist
add roel van velzen to my party of the century playlist 
add the artist to the political punks playlist 
add the album to my club hits playlist 
book a reservation for my babies and i
book a reservation for a restaurant not far from ma
i would like to book a restaurant in tanzania that is within walking distance for my mom and i
book a reservation for an oyster bar
book a reservation for 6 people for a creole tavern in montenegro
i need a table in sacaton at a gluten free restaurant
book sot for me and my grandfather nearby west reading
book me and my nieces a reservation for a seafood restaurant in cle elum  ne on ascension day
book spot for two at city tavern
i want to book a brasserie for 3 people in netherlands antilles 
book me a reservation for the best bistro
book the best table in tanzania for 5 people at a diner
i want to book a joint in a  spa 
book a gastropub that serves turkish food for 4 people
book spot for 7 at an indoor restaurant in mp now
book a table in fiji for zero a m
i want to book a restaurant for five people in sri lanka 
i need a table for 5 at a highly rated gastropub in concord mn
i want to book oregon electric station in north city 
i need a table for 4 please confirm the reservation 
book a popular restaurant for 5 people
i want to book a joint close by the naomi s hostel for a meal for 8 people 
i want to eat a delicatessen in thirteen hours that serves eastern european food
book a reservation for nine people at a bakery in nunez
book a reservation at tavern for noodle
book spot for 4 in somalia
i want to book albany pump station in buckholts washington now for a party of 9 
i want to book a taverna in archer city for this spring for nine people 
i want to book a top-rated brasserie for 7 people 
book a reservation for 8 people in wardville  kansas
table for breadline cafe in minnesota next friday
i want to book a restaurant in niger for seven people 
book spot for 9
book me a reservation for a pub in cormorant for a party of nine
book spot for my nieces and i at a tea house
i want to book a jewish restaurant in gambia 
book a reservation for the dome  edinburgh close to brooklawn
book spot for 1 at town of ramsgate in merit
book a spot for me and kathrine  at smithville
i want to book a restaurant for my father in law and i in buckner a year from now 
book a restaurant reservation in 6 weeks
book a reservation for a bar with a spa nearby id
book spot for four at cliff house  san francisco in martinique
i need a table for 4 in saint helena at settha palace hotel
i want to book a restaurant in frenier 12 years from now for 4 people 
book seven in neighboring moorpark
i want to eat by five pm in ne for a six people
i want to book tupelo honey cafe in new jersey for five people 
book a reservation for two at mickies dairy bar in weedsport
book a table at a fried chicken restaurant
book spot for mavis  sheila and i in syria at elevenses
can you book me a table at windows on the world in cokeville   mi
book me a table for 5 this year at cherwell boathouse
book spot for six  at 8 pm at a coffeehouse in ne that serves hog fry
i want to book a restaurant close-by in inman for five people 
i need a table at eddie s attic in nevada for one
book a reservation for an osteria restaurant for 4 people on november 4
i want to book a top-rated restaurant close by in la for me  rebecca and loraine on 2/6/2020 
book a reservation for 1 at a diner in wi
book a reservation for 5 people at the top-rated brasserie restaurant
book a table on 1/20/2023 for 5 people in mh
book a table near pat s college
i want to book a steakhouse in vimy ridge 
i want a table at james d  conrey house in urbank california
like to book a seat in monaco for the yankee doodle coffee shop
i want to book a table in a restaurant in bouvet island 
i would like to book a restaurant for souvlaki cuisine in the state of ne
book a reservation for 10 people at an oyster bar with a pool within the same area of cowansburg for 10 pm
book a reservation for velma  ana and rebecca for an american pizzeria at 5 am in ma
book a spot for 4 in oklahoma at south street diner
book a reservation for my mommy and i at a restaurant in central african republic
book a reservation for five people for a tatar taverna in sargents
phyllis ward and veronica need a table at a restaurant in 152 days
book a reservation for ten at a restaurant in ohio
i want to book a tea house that serves salade far from here at midnight in panama for two people 
i want to book a food truck for seven people in the republic of the congo 
i want to book a restaurant for ten people 
lets eat near oakfield 17 seconds from now at ted peters famous smoked fish
book sot for 7 at a restaurant that serves european in stringtown on feb  the 28th  2034
book a restaurant for six at an outdoor cafe in åland
book a table for 12 am  at our step mother s secondary residence within walking distance for one
please book me a table at a pizzeria with a parking facility in ghana 
book spot for four at a indoor pub within the same area of louisiana in one minute 
please book me a restaurant
book a reservation for me and my step brother at amt coffee in lakemoor
i want to book a churrascaria in romeoville at ten a m for four people 
table for 5 a m  at baker s keyboard lounge
please book me a table at a bistro which serves lorna doone 
i want to book a restaurant for six people in wagstaff ak 
i would like to book a highly rated restaurant for a party of ten 
i want to book a sundanese gastropub nearby in texas for 3 people on 5/20/2025 
book a party of five at seagoville for 06:42
book spot for 9 at thurmont
i want to book a restaurant in sixteen seconds for 5 people in gold point montana 
i want to eat in ramona
book a party at their campus within the same area for churrascaria
book me a reservation for a party of 3 at a pub in northern mariana islands
i want to book a bougatsa restaurant in next year nearby penn for three people 
book a reservation for nine people at the best pub nearby tangier in six months
need a table somewhere in quarryville 14 hours from now
what will the weather be faraway from here
will there be fog in tahquamenon falls state park
tell me the weather forecast for gibsland
is there a storm now in nc
what will the weather be in monument of lihula on december the 5th
weather next year in dominica
when will it be hot here
what will the weather be in 1 day in kuwait
what kind of weather will be in ukraine one minute from now
humidity in olvey new hampshire
what s the weather going to be in ut
humidity not far from colorado city on november the 7th  2024
what is the forecast for wyoming at stanardsville during the storm
what will the weather be in north carolina
what is the forecast starting 11 weeks from now nearby the state of wisconsin
will it be rainy at sunrise in ramey saudi arabia
check the forecast for nebraska 
will it be warmer in north korea at nineteen o clock
let me know the weather forecast around ten pm faraway from here in park narodowy brimstone hill fortress 
will it be stormy in the ouachita national forest
tell me if it will be snowy 8 hours from now in mount airy  vi
what will the weather be nineteen hours from now neighboring saint kitts and nevis
will there be hail on 11/12/2036 in singapore
will it be colder here in 48 and a half weeks
what s the weather going to be in knobel
what will the weather be in dane on sep  the fifth  2030
what will the weather be in ohio
i need to know the weather for jan  the 3rd in mexico when i go to port vue
what is the forecast for ōtone prefectural natural park in 1 hour and within the same area
what kind of weather is forecast around one pm near vatican
will it be chilly in weldona
will it be colder in virgin islands national park
will it be hot at 13:19 in de funiak springs serbia and montenegro
what is the weather going to be like in virginia on st  patrick s day
weather in kaneville maryland
when is sunrise for ar
what will the weather be not far from here on october the nineteenth  2026
what is the forecast for waurika in samoa
tell me the weather forecast here
what is the weather forecast nearby nicodemus
what will the weather be in nov  in brookneal
will it be colder four months from now in suwanee ak
what is the weather forecast for burundi
what s the weather in benton city
what will the weather be in ky on oct  16  2036
will the sun be out in 1 minute in searcy  uganda
what is the weather here
what will the weather be one second from now in chad
what kind of weather is forecast in ms now
what is the forecast for la for freezing 
how cold will it be here in 1 second 
what is the forecast for hotter weather at southford falls state park
what is the overcast forecast for the current position starting on jul  19  2030
what is the forecast for morocco  at lake ozark on december seventeenth  2022
what will the humidity be in the current spot at 15:19:29
what is the forecast in nicodemus and nearby
what is the weather going to be like in benton colorado in 2 and a half months
what s the weather forecast for bothe-napa valley state park close by february 20
what is the forecast for beginning on nov  17 for franklinville
what s the forecast for sep  26 in emerado saint pierre and miquelon
will there be a blizzard next winter in visalia  idaho
will it be warmer in the district of columbia on may 25  2033
what will the weather be here on dec  7th
what is the forecast for colder temps beginning on law day here
what s the weather like in tyonek  new jersey
what is the forecast for here for blizzard conditions at five pm
will there be a storm in gibsonia at 8 p m
what is the cold condition of our current position for tomorrow
what will the weather be in hialeah gardens on october the 24th
will it be freezing today in delaware and lehigh national heritage corridor
what is the forecast in admire in tx starting at seventeen 
what is the forecast in north carolina for edgemoor
what is the forecast for costa rica
need weather for parc national tolhuaca to see if it will be fog today
weather in walden russia on 12/26/2018
what s the humidity here right now
how s the weather at petit manan national wildlife refuge and nearby right now
what is the forecast for lansford for temperate weather
overcast on state holiday in pawling nature reserve  and neighboring places
i need the weather in wakarusa
tell me the forecast for 6 am in tatra-nationalpark
tell me the weather forecast for ut on thursday
what is the forecast for turtle islands national park
will it be hotter in pr at 23 o clock
weather in two hours  in uzbekistan
what is the forecast for this afternoon for blizzard conditions in dieterich chad
how s the weather here at two am
will custer national forest be chillier at seven pm
what is the forecast for starting at three a m in two buttes for warm weather
what s the weather in fox chapel
what is the rain forecast for one hour from now in south korea
tell me the weather forecast here
will there be a cloud in vi in 14 minutes 
how much colder will it be not far from utah around 3 am
will it be chilly midday in cresbard afghanistan
what will the weather be in sarygamyş sanctuary on august 21  2035
will it be rainy in tenino
will it be hot in the netherlands on february 16th
where is belgium located
what will the weather be in milleville beach
can you put on like a hurricane by paul landers
play the happy blues by ronnie wood 
play the newest melody on last fm by eddie vinson 
use groove shark to play music
please play something good from u-roy   any song from 1975 on zvooq will do 
play a symphony from 2013 
let me hear the good songs from james iha
play my inventive playlist
i want to play music from iheart
play subconscious lobotomy from jennifer paull 
i want to hear a seventies sound track 
play a john maher track
please play something from dihan slabbert that s on the top fifty
please play something catchy on youtube
play something from 2004 by imogen heap on spotify
play seventies music please 
play music from the artist sean yseult and sort it through top-50
play anything jd natasha did in the thirties
play music off netflix 
nineties songs on zvooq
open itunes and play ben burnley ready to die
play an ep by zak starkey 
play an album from nithyasree mahadevan 
i want to listen to something on youtube
start playing something from iheart
play trance life on zvooq 
find and play a concerto on zvooq from 1978 by ginger pooley
play all things must pass 
i want to hear music from allen toussaint from the fifties
turn on last fm
play a song by rahsaan patterson 
play femme fatale by bonobo
play some anneliese van der pol from the thirties on groove shark
i want to listen to an ep from 1998 
play paul mccartney
play jill sobule album
play chant s from 1973 
play something from 90s pop rock essentials
play have you met miss jones by nicole from google music 
play chant by nigger kojak on itunes
play some sixties songs on google music
play a fifties album from dj yoda on last fm 
please play my ecstatic playlist 
open deezer and play curtain call: the hits by junichi okada 
let s play jamie robertson s handover on vimeo 
play a sixties soundtrack
play this is: miles davis on lastfm 
live in l a joseph meyer please
play the top twenty hisham abbas on youtube
play some seventies filipp kirkorow
play the most popular puretone
play music from e-type 
can you play a j  pero on groove shark
play a bob burns song
i want to hear leroi moore on vimeo   play the song chance of a lifetime 
play some symphony music from david lindley 
please play something on iheart from artist ari gold last album
i want to hear them from the artist murcof
play sound track music from the twenties
play dance with the devil by mr  lordi
play music from 1996 
go to itunes and play dr  lecter by david hodges
play s t r e e t  d a d  from hiromitsu agatsuma through pandora 
play some movement from the fourties
please tune into chieko ochi s good music
play the greatest music from bryan maclean 
play something on last fm
play music by joy nilo 
play some gary lee conner
play music by brian chase 
can you play top zvooq by fink
play the top-20 nawang khechog soundtrack
let s hear stuff from andrew hewitt 
play a good ep from the eighties by peter murphy 
play another passenger from louis nelson delisle 
play the top music from the railway children off last fm 
play the best becca
play something by duke ellington from the seventies
use the last fm service to play a mis niños de 30
play my black sabbath: the dio years playlist 
play an ep from mike harding 
i want to hear anything from the rock symphonique genre please 
please play a 1997 record 
put what color is your sky by alana davis on the stereo 
please play a movement from george formby jr 
play some new les vandyke on slacker
please open zvooq
play progressive metal 
i want to hear soundtrack music on youtube from helena iren michaelsen
play a song by ramesh narayan from 1960
play some blues britânico 
proceed with hitomi nabatame music from 2003 
play something on zvooq
play music from lynn & wade llp 
let me hear chris knight music
let s hear good mohammad mamle on vimeo 
please play a sound track from the fifties that s on iheart
play music from van-pires by dmitry malikov 
play rich sex on iheart
play modern psychedelia 
rate this album four out of 6 stars
give this textbook four stars 
rate a twist in the tale zero out of 6 points
rate the children of niobe 1 out of 6 points 
give zero stars to halo: ghosts of onyx
give this novel a score of 5
give the current series four of 6 points 
give 4 out of 6 points to the spirit ring chronicle
give two stars out of 6 to 36 children
rate the sneetches and other stories a three
rate the current series four stars 
rate this book a 4 out of 6
rate the current novel 5 of 6 stars
rate this book a 1 
give zero out of 6 to the current album
give this album 5 points 
rate the mystery of the tolling bell series 4 stars 
give the current novel two stars 
give the current book 4 stars
give joe magarac and his usa citizen papers 5 points
rate the guilty 0 of 6 points
rate this textbook four out of 6
give the catedral series four stars 
reminiscences of the anti-japanese guerillas chronicle deserves zero points out of 6 for a rating 
give small screen  big picture a 0 out of 6 rating 
gods and pawns should get a three
give zero stars to this textbook
rate the current novel a 4 out of 6 stars 
rate the book the atmospheric railway 5 out of 6
rate black boy 4 out of 6
rate the chronicle current 1 star
mark this album a score of 5
rate the current novel zero out of 6
rate the current novel a 2
give the giant devil dingo 4 points 
rate this current novel two out of 6 
give monthly index of medical specialities a two out of 6 rating 
rate this novel 2 out of 6 points
rate the current novel 3 stars
rate the current essay zero out of 6 stars
rate this current album 0 stars
give a brief stop on the road from auschwitz 1 out of 6 stars
rate this album 4 out of 6 stars
rate hate that cat 1 out of 6 stars 
give my current book one of 6 stars
rate current novel one stars 
give five out of 6 points to this album
give a rating of 2 to juneteenth 
rate ruth five out of 6 points 
rate the sea of trolls 1 stars out of 6
give the zenith angle one out of 6 points
give zero stars to rhialto the marvellous
give the current book a zero of 6
rate personal demons 0 out of 6 points
rate the current series a 4
give one of 6 points to who will cry when you die
give zero out of 6 stars to this album
give this novel 2 stars
rate the 8-week cholesterol cure three out of 6 
rate this novel 3 out of 6 points
rate the lives of john lennon five points
give the american scene 2 of 6 stars
rate this textbook a one 
give summer of the swans 1 points 
give the current textbook a rating of five 
give 4 points to the person and the common good
give a four rating to a world apart 
rate this chronicle 0 points
give wilco: learning how to die a rating of four points 
rate this saga two out of 6 
rate the gift: imagination and the erotic life of property five stars
rate neverwhere four out of 6
rate in the company of cheerful ladies a zero out of 6
give one start to the current book
give this chronicle a 2 rating 
rate this essay a 1
out of 6  give rivers of babylon a 1
give 5 of 6 stars to expressive processing
rate the ghost house series a one
rate know ye not agincourt 2 out of 6 stars
i would rate theft: a love story four out of 6 stars 
rate the further adventures of the joker four stars
give 0 rating to in the heart of the country
give 1 out of 6 rating to the current textbook
give the current chronicle five of 6 points
rate cotton comes to harlem a 2
give this album one stars
rate the adventures of augie march one points
rate soul music a 0 
give hindu temples: what happened to them a 5 out of 6 stars 
give this novel a 1 
rate the current textbook 1 out of 6
give this textbook 0 out of 6 stars
give the crystal snare 5 stars
rate this saga two out of 6 
give wilco: learning how to die a rating of four points 
rate this book 3 stars out of 6
rate the three junes one out of 6
give four stars to the broken window
rate the current series 4 points
wish to find the movie the heart beat
please look up the tv show  vanity 
get me the elvis  christmas album tv show 
please find me the saga  the deep six 
wish to see the photograph with the name live: right here
looking for a novel called death march
can you find me the work  the curse of oak island
please get me the sacred and profane love machine game 
need a creative work called hit by love
search for the trailer for the office
looking for a creative work called plant ecology
find the television show to me
can you please find me the saga chump change
can you find me the ridiculous 6 book
please fine me the tv series  now we are married 
please look up the work  bachelor pad 
please help me find the late night heartbroken blues television show 
please help me find  bend it like beckham the musical 
please look up the tv series parables for wooden ears 
can you find me  hey man
please search for switched 
can you get me the controlled conversations tv series
please look up the song the mad magician 
please search for the tv show  the best of white lion 
please find me phineas redux 
get me the procession of ants tv show 
looking for a game called phinally phamous
can you search the daring youth saga
look for the book the girl who was plugged in 
find me a tv show called baby blue
search for appalachian journey
look for the television show meet the prince
can you find me cracks the safe
please help me search the hell money saga 
get me the secret south song 
can you find me the work titled music for millions
please search for the painting titled this is the night 
could you locate the epic conditions picture
get me the trailer of good morning sunshine
please search the an introduction to karl marx painting 
can you find me the blue spring trailer
could you find the tv series the approach
search for the tv show  a lawless street 
please look up three essays on the theory of sexuality show 
please get me the compulsive disclosure song 
can you look up the molecular oncology saga
search for the sound of one hand clapping
find the creative work deadly weapons
need the creative work called the logic of scientific discovery
can you find me the national anthem of the ancient britons television show
can you please find me the harry hood saga
can you find me the work  bible translations into hawaii pidgin
please look up and find me monty python live at the hollywood bowl 
please search for mary 
please search the game atla: all this life allows 
find me the novel with the name to lose my life …
looking for a song with the title of live at the kings center
can you find the american bison photograph
can you find me the free for all show
please find me the olympia 74 soundtrack 
look for the album slave to the grind
please find me the projekt: the new face of goth 
can you get me the message from god saga
find me the soundtrack a honeymoon adventure
please get me the henderson kids saga 
find the movie splendor in the grass
am looking for a book with the title free to play
look for the tv series jersey boys
can you search the book  paris - when it sizzles
looking for a painting with the title with you
please find me the classified book 
look for the show v-the new mythology suite
find the creative work face down
find four songs
find me the soundtrack live at the greek theatre
please search for the television show  episodi di the blacklist 
find a creative work called fire in the hole
looking for the picture with the name of who made stevie crye
look for the album wolves within
find the album orphan girl at the cemetery
please find me the journal of the british astronomical association movie 
find the tv show the daydreamer
can you please get me the book dracula 5: the blood legacy
please look up the novel  live to dance 
please find me the video game titled 20 hours in america 
find the creative work the devil in stitches
please look up the work  prophets 
i m looking for welcome to the canteen
please search for the journal of official statistics show 
please look up show-biz blues photograph 
please search the woodsmen of the west 
can you find the creative works associated with caryl & marilyn: real friends
please get me the dead soul saga 
please search the live from leeds album 
please look up the johnny english - la rinascita painting 
can you find me the sword with no name trailer
i wish to watch the fold trailer  please search 
can you find me the almost human painting
please find me the work  serious awesomeness 
search for the game difficult loves
is babar: king of the elephants playing 
is the ghost playing
is bartok the magnificent playing at seven am
what s the movie schedule
i want to see jla adventures: trapped in time
when is the fox and the child playing in this cinema
show me the schedule for rat rod rockers
is any which way you can playing in 15 seconds
i want to see the portrait of a lady at the nearest cinema 
where can i see the prime ministers: the pioneers
i need to find the movie theatre showing the crooked web closest to me
i want to see while the sun shines at the closest movie house 
i want to see those kids from town  when will it be showing
find the schedule for the comedian at santikos theatres 
what are the movie schedules for my favorite theaters 
what are the movies showing in the neighbourhood 
is without witness playing twenty two hours from now
i need animated movies in the area for dinner time
i want to see i dream of jeanie in a movie theatre
can i see ellis island revisited in 1 minute
i want animated movies at mjr theatres
show me the schedule for the oblong box
i want to know if there are any movies playing in the area 
is what a wonderful place showing at cinemark theatres
show the closest movie theatre that shows boycott
i want to see doa: dead or alive at loews cineplex entertainment 
is the nightmare showing six hours from now at the nearest cinema 
what is the nearest movie house with window connection playing at lunch
is patrick still lives showing at amc theaters
fine the movie schedules for the wanda group 
give me the movie schedule nearby
find the schedule at the douglas theatre company 
show me the movies at harkins theatres 
what movies at star theatres 
i want a movie schedule 
can i get the movie times
i want to see medal for the general
can i get the times for movies in the neighbourhood
may i have the movie schedules for speakeasy theaters
find animated movies close by
is american primitive showing in santikos theatres
what are the movie schedules in the neighborhood
check the schedule for bow tie cinemas 
check the timings for snowbound at the closest movie theatre 
what are the movie times at caribbean cinemas
i need films in the neighborhood
show the movie schedules in the neighborhood
where s the nearest movie house showing foreign films
what movies are showing now at the closest cinema
is rumor has it playing
i need a list of speakeasy theaters movie times
when is the outer space connection playing at the nearest cinema 
find the movie times at harkins theatres 
find the films at century theatres 
show the animated movies playing in the neighbourhood
i want to see fear chamber 
show me southern theatres movie times
is the unnaturals showing at 13 
is no time to be young showing at amc theaters
find the movie schedules for regal entertainment group 
i want to see shattered image 
find the schedule at star theatres 
will i think i do be playing at 7 pm
show me the schedule for arclight hollywood for only animated movies
find the schedule for great mail robbery 
give me the movies in the neighborhood 
what movies are playing close by
is the two gladiators playing
what s the movie schedule for great escape theatres
find the movie schedule close by
i want to see outcast 
show me the schedule of movie the great gildersleeve near movie house
i need times for a yiddish world remembered at dipson theatres
find the movie schedules at goodrich quality theaters 
show me the movie schedule in the neighbourhood 
show me the movie times for films  nearby
show the movie times for animated movies in the neighbourhood
is the eye – infinity playing at general cinema corporation
can you check the timings for super sweet 16: the movie
is we are northern lights playing in any movie theatre
what times will the young swordsman be showing at my cinema
show the sexy dance 2 times at the  closest movie house
what are some close by animated movies showing
movie schedules close by for animated movies
what films are playing close by
find the movie schedule in the area 
is cowboy canteen playing
is rare birds showing at the nearest movie theatre at noon 
what are the movie times
where can i find the movie schedules
find the movie schedule for north american cinemas in eleven seconds 
find the nearest cinema with movies playing
what are the movie times
what are the times for the gingerbread man
what films are playing close by
is any cinema playing the spirit of youth
what are the movie times for animated movies in the neighbourhood
what s the movie schedule at great escape theatres
show the times for cheers for miss bishop at dipson theatres 
i want to see married to the enemy 2 at a cinema 
